# Supplementary material for: Short-Term Omega-3 Supplementation Modulates Novel Neurovascular and Fatty Acid Metabolic Proteome Changes in the Retina and Ophthalmic Artery of Mice with Targeted Cyp2c44 Gene Deletion
Source: Cells. 2022 Nov 4;11(21):3494. doi: 10.3390/cells11213494 (PMC9658563; doi:10.3390/cells11213494)
Supplement: Supplementary file 1 [file cells-11-03494-s001.zip › Supplementary tables_Perumal et al 2022_Cells.xlsx]

## Sheet: Table S1
	Supplementary Table S1: MaxQuant parameters for ophthalmic artery and retina
	Parameter	Value
	Version	2.0.1.0
	Include contaminants	FALSE
	PSM FDR	0.01
	PSM FDR Crosslink	0.01
	Protein FDR	0.01
	Site FDR	0.01
	Use Normalized Ratios For Occupancy	TRUE
	Min. peptide Length	6
	Min. score for unmodified peptides	0
	Min. score for modified peptides	40
	Min. delta score for unmodified peptides	0
	Min. delta score for modified peptides	6
	Min. unique peptides	0
	Min. razor peptides	1
	Min. peptides	1
	Use only unmodified peptides and	TRUE
	Modifications included in protein quantification	Oxidation (M);Acetyl (Protein N-term)
	Peptides used for protein quantification	Razor
	Discard unmodified counterpart peptides	TRUE
	Label min. ratio count	2
	Use delta score	FALSE
	iBAQ	TRUE
	iBAQ log fit	TRUE
	Match between runs	TRUE
	Matching time window [min]	1
	Match ion mobility window [indices]	0.05
	Alignment time window [min]	20
	Alignment ion mobility window [indices]	1
	Find dependent peptides	FALSE
	Fasta file	Database, Human (9606); Date, 21 May 2021; Total proteins annotated, 20395
		Database, Mouse (10090); Date, 21 May 2021; Total proteins annotated, 17073
	Decoy mode	revert
	Include contaminants	FALSE
	Advanced ratios	TRUE
	Fixed andromeda index folder
	Combined folder location
	Second peptides	TRUE
	Stabilize large LFQ ratios	TRUE
	Separate LFQ in parameter groups	FALSE
	Require MS/MS for LFQ comparisons	TRUE
	Calculate peak properties	FALSE
	Main search max. combinations	200
	Advanced site intensities	TRUE
	Write msScans table	FALSE
	Write msmsScans table	TRUE
	Write ms3Scans table	TRUE
	Write allPeptides table	TRUE
	Write mzRange table	TRUE
	Write DIA fragments table	FALSE
	Write DIA fragments quant table	FALSE
	Write pasefMsmsScans table	TRUE
	Write accumulatedMsmsScans table	TRUE
	Max. peptide mass [Da]	4600
	Min. peptide length for unspecific search	8
	Max. peptide length for unspecific search	25
	Razor protein FDR	TRUE
	Disable MD5	FALSE
	Max mods in site table	3
	Match unidentified features	FALSE
	Epsilon score for mutations
	Evaluate variant peptides separately	TRUE
	Variation mode	None
	MS/MS tol. (FTMS)	20 ppm
	Top MS/MS peaks per Da interval. (FTMS)	12
	Da interval. (FTMS)	100
	MS/MS deisotoping (FTMS)	TRUE
	MS/MS deisotoping tolerance (FTMS)	7
	MS/MS deisotoping tolerance unit (FTMS)	ppm
	MS/MS higher charges (FTMS)	TRUE
	MS/MS water loss (FTMS)	TRUE
	MS/MS ammonia loss (FTMS)	TRUE
	MS/MS dependent losses (FTMS)	TRUE
	MS/MS recalibration (FTMS)	FALSE
	MS/MS tol. (ITMS)	0.5 Da
	Top MS/MS peaks per Da interval. (ITMS)	8
	Da interval. (ITMS)	100
	MS/MS deisotoping (ITMS)	FALSE
	MS/MS deisotoping tolerance (ITMS)	0.15
	MS/MS deisotoping tolerance unit (ITMS)	Da
	MS/MS higher charges (ITMS)	TRUE
	MS/MS water loss (ITMS)	TRUE
	MS/MS ammonia loss (ITMS)	TRUE
	MS/MS dependent losses (ITMS)	TRUE
	MS/MS recalibration (ITMS)	FALSE
	MS/MS tol. (TOF)	40 ppm
	Top MS/MS peaks per Da interval. (TOF)	10
	Da interval. (TOF)	100
	MS/MS deisotoping (TOF)	TRUE
	MS/MS deisotoping tolerance (TOF)	0.01
	MS/MS deisotoping tolerance unit (TOF)	Da
	MS/MS higher charges (TOF)	TRUE
	MS/MS water loss (TOF)	TRUE
	MS/MS ammonia loss (TOF)	TRUE
	MS/MS dependent losses (TOF)	TRUE
	MS/MS recalibration (TOF)	FALSE
	MS/MS tol. (Unknown)	20 ppm
	Top MS/MS peaks per Da interval. (Unknown)	12
	Da interval. (Unknown)	100
	MS/MS deisotoping (Unknown)	TRUE
	MS/MS deisotoping tolerance (Unknown)	7
	MS/MS deisotoping tolerance unit (Unknown)	ppm
	MS/MS higher charges (Unknown)	TRUE
	MS/MS water loss (Unknown)	TRUE
	MS/MS ammonia loss (Unknown)	TRUE
	MS/MS dependent losses (Unknown)	TRUE
	MS/MS recalibration (Unknown)	FALSE
	Site tables	Oxidation (M)Sites.txt

## Sheet: Table S2
	Supplementary Table S2: Total proteins identified from the ophthalmic artery
Majority protein IDs	Protein names	Gene names	Fasta headers	Species	Peptide sequences	Taxonomy IDs	Peptides	Razor + unique peptides	Unique peptides	Sequence coverage [%]	Mol. weight [kDa]	Intensity	Intensity OA_KO ω3_01	Intensity OA_KO ω3_02	Intensity OA_KO ω3_03	Intensity OA_KO PBS_01	Intensity OA_KO PBS_02	Intensity OA_KO PBS_03	Intensity OA_fl ω3_01	Intensity OA_fl ω3_02	Intensity OA_fl ω3_03	Intensity OA_fl PBS_01	Intensity OA_fl PBS_02	Intensity OA_fl PBS_03	LFQ OA_KO ω3_01	LFQ OA_KO ω3_02	LFQ OA_KO ω3_03	LFQ OA_KO PBS_01	LFQ OA_KO PBS_02	LFQ OA_KO PBS_03	LFQ OA_fl ω3_01	LFQ OA_fl ω3_02	LFQ OA_fl ω3_03	LFQ OA_fl PBS_01	LFQ OA_fl PBS_02	LFQ OA_fl PBS_03
Q61838	Alpha-2-macroglobulin	A2m	sp|Q61838|PZP_MOUSE Pregnancy zone protein OS=Mus musculus OX=10090 GN=Pzp PE=1 SV=3	Mus musculus	HSLGDNDAHSIFQSVGINIFTNSK;VNTNYRPGLPFSGQVLLVDEK	10090	2	2	2	3	165.85	27831000	0	1914300	6592400	3561500	1503200	0	0	0	3003800	2743400	1595800	6916500	0	1265600	6552800	2406300	934620	0	0	0	1345600	2196700	2384500	2736700
Q91V24	ATP-binding cassette sub-family A member 7	Abca7	sp|Q91V24|ABCA7_MOUSE ATP-binding cassette sub-family A member 7 OS=Mus musculus OX=10090 GN=Abca7 PE=1 SV=1	Mus musculus	ALLRRPR	10090	1	1	1	0.3	236.88	76975000	0	44579000	0	0	0	0	0	0	19058000	13338000	0	0	0	0	0	0	0	0	0	0	0	0	0	0
P21447	Multidrug resistance protein 1A	Abcb1a	sp|P21447|MDR1A_MOUSE ATP-dependent translocase ABCB1 OS=Mus musculus OX=10090 GN=Abcb1a PE=1 SV=3;sp|P06795|MDR1B_MOUSE ATP-dependent translocase ABCB1 OS=Mus musculus OX=10090 GN=Abcb1b PE=1 SV=1	Mus musculus	AGAVAEEVLAAIR;EANIHQFIDSLPDKYNTR;MELEEDLK	10090	3	3	2	3.1	140.64	23730000	1104600	1862500	1055800	800210	1050300	1813200	687740	5259700	1883300	1252000	2620000	4340800	597610	1028000	891750	488120	958860	879270	645580	1148300	1471900	1397300	1058100	826400
Q8WU67	Phospholipase ABHD3	ABHD3	sp|Q8WU67|ABHD3_HUMAN Phospholipase ABHD3 OS=Homo sapiens OX=9606 GN=ABHD3 PE=2 SV=2	Homo sapiens	MQRLAMDLR	9606	1	1	0	2.2	46.008	421550	0	0	0	0	421550	0	0	0	0	0	0	0	0	0	0	0	0	0	0	0	0	0	0	0
Q5SSL4	Active breakpoint cluster region-related protein	Abr	sp|Q5SSL4|ABR_MOUSE Active breakpoint cluster region-related protein OS=Mus musculus OX=10090 GN=Abr PE=1 SV=1	Mus musculus	QLVKDGFLVEMSESSRK	10090	1	1	1	2	97.666	24405000	0	0	0	0	11517000	0	9712100	0	0	0	0	3176900	0	0	0	0	5573400	0	7874800	0	0	0	0	2585800
Q8BWT1	3-ketoacyl-CoA thiolase, mitochondrial	Acaa2	sp|Q8BWT1|THIM_MOUSE 3-ketoacyl-CoA thiolase, mitochondrial OS=Mus musculus OX=10090 GN=Acaa2 PE=1 SV=3	Mus musculus	ALDLDPSKTNVSGGAIALGHPLGGSGSR;DFSATDLTEFAAR;VGVPTETGALTLNR	10090	3	3	3	13.9	41.829	58378000	2450300	10427000	2512900	3111300	4825900	4029700	7813500	6554800	4158800	2020500	7132400	3340700	3004600	4408900	1225800	1094600	1295600	2885600	6389000	3626000	1499300	2033900	1721600	1792500
P51174	Long-chain specific acyl-CoA dehydrogenase, mitochondrial	Acadl	sp|P51174|ACADL_MOUSE Long-chain specific acyl-CoA dehydrogenase, mitochondrial OS=Mus musculus OX=10090 GN=Acadl PE=1 SV=2	Mus musculus	AGEVSREVWEK;IFSSEHDIFR;KFFQEEVIPHHTEWEK;QIVSDS;RIFSSEHDIFR	10090	5	5	4	10.2	47.907	65733000	760220	3118200	4388600	1977800	814230	7577900	5919600	9513400	3404700	15739000	11143000	1375900	0	696530	6486300	2178900	0	4008200	3156400	4374500	2952400	5133100	2066100	2671200
P45952	Medium-chain specific acyl-CoA dehydrogenase, mitochondrial	Acadm	sp|P45952|ACADM_MOUSE Medium-chain specific acyl-CoA dehydrogenase, mitochondrial OS=Mus musculus OX=10090 GN=Acadm PE=1 SV=1	Mus musculus	EEIIPVAPEYDK;KGDEYVINGQK;TRPTVAAGAVGLAQR	10090	3	3	3	9	46.481	121280000	6006200	4595200	2795900	2819000	17908000	13944000	10860000	4200000	0	19592000	30889000	7669600	2591800	5362500	3169600	4609800	12312000	5845600	6914200	4434500	0	8928300	6307400	3263700
Q8QZT1	Acetyl-CoA acetyltransferase, mitochondrial	Acat1	sp|Q8QZT1|THIL_MOUSE Acetyl-CoA acetyltransferase, mitochondrial OS=Mus musculus OX=10090 GN=Acat1 PE=1 SV=1	Mus musculus	LGTAAIQGAIEK;LGTAAIQGAIEKAGIPKEEVK;QEQDTYALSSYTR;SKEAWDAGKFASEITPITISVK;TPIGSFLGSLASQPATK	10090	5	5	5	17.2	44.816	216690000	5068900	8707900	6303600	9954300	37753000	16505000	25265000	39004000	32431000	5870800	20574000	9251100	3783700	7285900	7456600	7602700	17028000	5578900	6118800	14518000	9434800	5106800	7665800	6035700
P09470	Angiotensin-converting enzyme	Ace	sp|P09470|ACE_MOUSE Angiotensin-converting enzyme OS=Mus musculus OX=10090 GN=Ace PE=1 SV=3	Mus musculus	NGEVLGWPENQWRPPLPDNYPEGIDLETDEAK;SLYESDNLEQDLEK	10090	2	2	2	3.5	150.92	32638000	2680600	2837900	1898300	0	795970	8674700	793060	3012500	1361300	0	3438700	7144800	2316700	2017600	1707800	0	532180	4997900	545210	1865400	860140	0	1854300	3414400
Q99KI0	Aconitate hydratase, mitochondrial	Aco2	sp|Q99KI0|ACON_MOUSE Aconitate hydratase, mitochondrial OS=Mus musculus OX=10090 GN=Aco2 PE=1 SV=1	Mus musculus	AKDINQEVYNFLATAGAK;DVGGIVLANACGPCIGQWDRK;FKLEAPDADELPR;GHLDNISNNLLIGAINIENGKANSVR;IVYGHLDDPANQEIER;LEAPDADELPR;LNRPLTLSEK;NAVTQEFGPVPDTAR;QGLLPLTFADPSDYNK;RAKDINQEVYNFLATAGAK;SDFDPGQDTYQHPPKDSSGQRVDVSPTSQR;SQFTITPGSEQIR;TDIANLAEEFK;VAVPSTIHCDHLIEAQVGGEKDLRR;VGLIGSCTNSSYEDMGR;WVVIGDENYGEGSSR	10090	16	16	7	31.5	85.462	1080800000	59011000	107790000	60029000	41023000	49931000	95116000	81682000	65970000	96538000	198370000	129410000	95975000	18249000	20953000	17405000	12188000	11731000	18521000	15421000	19372000	13262000	43093000	22746000	18840000
Q9QYR9	Acyl-coenzyme A thioesterase 2, mitochondrial	Acot2	sp|Q9QYR9|ACOT2_MOUSE Acyl-coenzyme A thioesterase 2, mitochondrial OS=Mus musculus OX=10090 GN=Acot2 PE=1 SV=2;sp|Q32Q92|ACOT6_MOUSE Acyl-coenzyme A thioesterase 6 OS=Mus musculus OX=10090 GN=Acot6 PE=1 SV=1;sp|O55137|ACOT1_MOUSE Acyl-coenzyme A thioester	Mus musculus	DGLLDVVEALQSPLVDKK;SCWDEPLSIAVR	10090	2	2	2	6.6	49.656	15803000	547260	1708500	1517200	610460	1466800	1625600	1320700	0	2039900	859940	2432000	1674900	549480	952510	1134700	618710	984640	932940	911600	0	882360	743410	1316800	877360
P33121	Long-chain-fatty-acid--CoA ligase 1	ACSL1	sp|P33121|ACSL1_HUMAN Long-chain-fatty-acid--CoA ligase 1 OS=Homo sapiens OX=9606 GN=ACSL1 PE=1 SV=1	Homo sapiens	GIQVSNNGPCLGSR	9606	1	1	0	2	77.942	9970300	909940	915870	0	420380	0	0	572490	0	1890300	3094000	2167400	0	854210	683390	0	440490	0	0	488550	0	1024100	2888000	1009300	0
Q91VA0	Acyl-coenzyme A synthetase ACSM1, mitochondrial	Acsm1	sp|Q91VA0|ACSM1_MOUSE Acyl-coenzyme A synthetase ACSM1, mitochondrial OS=Mus musculus OX=10090 GN=Acsm1 PE=1 SV=1	Mus musculus	MQWLKSFQICK	10090	1	1	1	1.9	64.76	44983000	0	7353400	0	0	0	0	0	0	8043000	6222800	23364000	0	0	0	0	0	0	0	0	0	0	0	0	0
P62736	Actin, aortic smooth muscle	ACTA2	sp|P62736|ACTA_HUMAN Actin, aortic smooth muscle OS=Homo sapiens OX=9606 GN=ACTA2 PE=1 SV=1;sp|P63267|ACTH_HUMAN Actin, gamma-enteric smooth muscle OS=Homo sapiens OX=9606 GN=ACTG2 PE=1 SV=1	Homo sapiens	AGFAGDDAPR;AGFAGDDAPRAVFPSIVGRPR;AVFPSIVGRPR;CDIDIRKDLYANNVLSGGTTMYPGIADR;CEEEDSTALVCDNGSGLCK;DIKEKLCYVALDFENEMATAASSSSLEK;DLTDYLMK;DLYANNVLSGGTTMYPGIADR;DSYVGDEAQSK;DSYVGDEAQSKR;DSYVGDEAQSKRGILTLK;EITALAPSTMK;EITALAPSTMKIK;EIVRDIKEK;EKLCYVALDFENEMATAASSSSLEK;FRCPETLFQPSFIGMESAGIHETTYNSIMK;GILTLKYPIEHGIITNWDDMEK;GYSFVTTAER;HQGVMVGMGQKDSYVGDEAQSK;HQGVMVGMGQKDSYVGDEAQSKR;ILTERGYSFVTTAER;IWHHSFYNELR…	9606	35	2	0	83.3	42.009	563810000	11371000	51626000	54633000	43274000	7077600	30779000	51976000	17168000	28854000	38473000	44712000	183870000	5553200	23479000	55322000	24028000	16718000	12975000	33834000	12298000	12454000	24842000	16304000	72756000
P60709	Actin, cytoplasmic 1	ACTB	sp|P60709|ACTB_HUMAN Actin, cytoplasmic 1 OS=Homo sapiens OX=9606 GN=ACTB PE=1 SV=1	Homo sapiens	AGFAGDDAPR;AGFAGDDAPRAVFPSIVGRPR;AVFPSIVGRPR;CDVDIRKDLYANTVLSGGTTMYPGIADR;DDDIAALVVDNGSGMCK;DDDIAALVVDNGSGMCKAGFAGDDAPR;DLTDYLMK;DLYANTVLSGGTTMYPGIADR;DSYVGDEAQSK;DSYVGDEAQSKR;DSYVGDEAQSKRGILTLK;EITALAPSTMK;EITALAPSTMKIK;EIVRDIKEK;GYSFTTTAER;HQGVMVGMGQKDSYVGDEAQSK;HQGVMVGMGQKDSYVGDEAQSKR;ILTERGYSFTTTAER;IWHHTFYNELR;LCYVALDFEQEMATAASSSSLEK;LDLAGRDLTDYLMK;LDLAGRDLTDYLMKILTER;MQKEITALAPSTMK;QEYDESGP…	9606	30	12	0	71.2	41.736	8698700000	451230000	842100000	374100000	344910000	413900000	1001500000	624530000	587790000	1117700000	446050000	1418200000	1076700000	225100000	199760000	242710000	178410000	201580000	171140000	204110000	189300000	316410000	202960000	291860000	330810000
P68032	Actin, alpha cardiac muscle 1	ACTC1	sp|P68032|ACTC_HUMAN Actin, alpha cardiac muscle 1 OS=Homo sapiens OX=9606 GN=ACTC1 PE=1 SV=1;sp|P68133|ACTS_HUMAN Actin, alpha skeletal muscle OS=Homo sapiens OX=9606 GN=ACTA1 PE=1 SV=1	Homo sapiens	AGFAGDDAPR;AGFAGDDAPRAVFPSIVGRPR;AVFPSIVGRPR;CDIDIRKDLYANNVLSGGTTMYPGIADR;DIKEKLCYVALDFENEMATAASSSSLEK;DLTDYLMK;DLYANNVLSGGTTMYPGIADR;DSYVGDEAQSK;DSYVGDEAQSKR;DSYVGDEAQSKRGILTLK;EITALAPSTMK;EITALAPSTMKIK;EIVRDIKEK;EKLCYVALDFENEMATAASSSSLEK;FRCPETLFQPSFIGMESAGIHETTYNSIMK;GILTLKYPIEHGIITNWDDMEK;GILTLKYPIEHGIITNWDDMEKIWHHTFYNELR;GYSFVTTAER;HQGVMVGMGQKDSYVGDEAQSK;HQGVMVGMGQKDSYVGDEAQSKR;ILTERGYSFVTTA…	9606	35	35	0	78.2	42.019	75503000000	4935400000	8274100000	3106200000	4499700000	4572800000	6994700000	5968500000	7992900000	8036000000	4619500000	9949500000	6553700000	1285400000	1344800000	896130000	1078400000	1093100000	964990000	1214400000	961200000	1562000000	1339200000	1724200000	1427800000
P63260	Actin, cytoplasmic 2	Actg1	sp|P63260|ACTG_MOUSE Actin, cytoplasmic 2 OS=Mus musculus OX=10090 GN=Actg1 PE=1 SV=1	Mus musculus	AGFAGDDAPR;AGFAGDDAPRAVFPSIVGRPR;AVFPSIVGRPR;CDVDIRKDLYANTVLSGGTTMYPGIADR;DLTDYLMK;DLYANTVLSGGTTMYPGIADR;DSYVGDEAQSK;DSYVGDEAQSKR;DSYVGDEAQSKRGILTLK;EEEIAALVIDNGSGMCK;EITALAPSTMK;EITALAPSTMKIK;EIVRDIKEK;GYSFTTTAER;HQGVMVGMGQKDSYVGDEAQSK;HQGVMVGMGQKDSYVGDEAQSKR;ILTERGYSFTTTAER;IWHHTFYNELR;LCYVALDFEQEMATAASSSSLEK;LDLAGRDLTDYLMK;LDLAGRDLTDYLMKILTER;MQKEITALAPSTMK;QEYDESGPSIVHR;SYELPDGQVITIGNER;SYELP…	10090	29	1	0	71.2	41.792	11701000	798780	1687500	1330500	0	1670600	1410500	0	0	2173700	0	944940	1684100	781500	1201700	1376900	0	1092800	879960	0	0	1343800	0	498530	936670
Q7TPR4	Alpha-actinin-1	Actn1	sp|Q7TPR4|ACTN1_MOUSE Alpha-actinin-1 OS=Mus musculus OX=10090 GN=Actn1 PE=1 SV=1	Mus musculus	AETAANRICK;AGTQIENIEEDFR;AIMTYVSSFYHAFSGAQK;ALDFIASKGVK;ALLKKHEAFESDLAAHQDR;ASFNHFDR;ASIHEAWTDGK;CQKICDQWDNLGALTQK;CQLEINFNTLQTK;CQLEINFNTLQTKLR;DAKGISQEQMNEFR;DDPLTNLNTAFDVAER;DGLGFCALIHR;DLLLDPAWEK;DQALTEEHAR;DYETATLSEIK;DYETATLSEIKALLK;EGLLLWCQR;ELPPDQAEYCIAR;ETADTDTADQVMASFK;FAIQDISVEETSAK;FLDIPKMLDAEDIVGTARPDEK;GISQEQMNEFR;GYEEWLLNEIR;HEAFESDLAAHQDR;HRPELIDYGK;ICDQWDNLGALTQK;IDQLECDHQLIQEALI…	10090	58	58	7	56.1	103.07	5959600000	417400000	385580000	380170000	482930000	549090000	504710000	352090000	564670000	681550000	288050000	635960000	717390000	57363000	32839000	48135000	45125000	52159000	36669000	33558000	41465000	41413000	29148000	47128000	50243000
Q9JI91	Alpha-actinin-2	Actn2	sp|Q9JI91|ACTN2_MOUSE Alpha-actinin-2 OS=Mus musculus OX=10090 GN=Actn2 PE=1 SV=2	Mus musculus	AGTQIENIEEDFR;ASFNHFDR;CQLEINFNTLQTK;CQLEINFNTLQTKLR;DLLLDPAWEK;DYESASLTEVR;EGLLLWCQR;ETADTDTAEQVIASFR;FAIQDISVEETSAK;GITQEQMNEFR;GYEEWLLNEIR;HEAFESDLAAHQDR;ILASDKPYILAEELR;ILASDKPYILAEELRR;KHEAFESDLAAHQDR;KTFTAWCNSHLR;KTFTAWCNSHLRK;LASELLEWIR;LLETIDQLHLEFAK;LLETIDQLHLEFAKR;LNKDDPIGNINLAMEIAEK;QFAAQANAIGPWIQNK;QLVPVRDQSLQEELAR;QLVPVRDQSLQEELARQHANER;QSILAIQNEVEK;TEKLLETIDQLHLEFAK;TEKLLETIDQLHLEFA…	10090	32	19	5	35.6	103.83	649630000	41558000	75605000	14727000	25169000	44536000	24544000	57866000	75309000	52564000	82304000	99260000	56184000	10038000	16560000	6350100	6490000	10321000	7315800	11868000	11086000	7468800	16324000	10537000	8341300
O88990	Alpha-actinin-3	Actn3	sp|O88990|ACTN3_MOUSE Alpha-actinin-3 OS=Mus musculus OX=10090 GN=Actn3 PE=2 SV=1	Mus musculus	AGTQIENIEEDFR;ALDFIASKGVK;ASFNHFDR;CQLEINFNTLQTK;CQLEINFNTLQTKLR;DAKGLSQEQLNEFR;DLLLDPAWEK;EGLLLWCQR;ELPAEQAEYCIR;ELPAEQAEYCIRR;FAIQDISVEETSAK;GAILGIQGEIQKICQTYGLRPK;GLSQEQLNEFR;HEAFESDLAAHQDR;ILAGDKNYITPEELR;KLVPSRDQTLQEELAR;KTFTAWCNSHLR;KTFTAWCNSHLRK;LAAGLAGSLEEQMAGLRQQEQNIINYK;LASELLEWIR;LLETIDQLQLEFAR;LRKDDPIGNLNTAFEVAEK;LVPSRDQTLQEELARQQVNER;QFAAQANAIGPWIQGK;TFTAWCNSHLR;TINEVENQVLTR;VEHIAALA…	10090	28	15	7	36.4	103.04	207870000	6040900	43032000	4009500	6155800	9000400	26989000	11652000	15483000	3040800	51126000	12841000	18499000	2119900	7279700	1861100	1779900	3549500	4874500	2420200	4332000	1365600	6639500	2653500	4870900
P57780	Alpha-actinin-4	Actn4	sp|P57780|ACTN4_MOUSE Alpha-actinin-4 OS=Mus musculus OX=10090 GN=Actn4 PE=1 SV=1	Mus musculus	ACLISLGYDVENDR;ACLISLGYDVENDRQGDAEFNR;AETAANRICK;AGTQIENIDEDFR;AIMTYVSSFYHAFSGAQK;ALDFIASKGVK;ASFNHFDKDHGGALGPEEFK;ASIHEAWTDGK;CQLEINFNTLQTK;CQLEINFNTLQTKLR;DDPVTNLNNAFEVAEK;DGLAFNALIHR;DHALLEEQSK;DHALLEEQSKQQSNEHLRR;DLLLDPAWEK;DYETATLSDIK;DYETATLSDIKALIR;EAILAIHKEAQR;EALEKTEKQLETIDQLHLEYAK;EGLLLWCQR;ELPPDQAEYCIAR;ETTDTDTADQVIASFK;ETTDTDTADQVIASFKVLAGDKNFITAEELR;FAIQDISVEETSAK;GISQEQMQEFR;GYEEWLL…	10090	58	36	9	61.4	104.98	1926100000	135460000	59173000	80508000	106780000	198600000	227840000	147000000	130140000	234110000	61321000	198580000	346600000	25109000	10562000	17517000	20034000	19646000	17582000	13573000	13248000	22664000	11671000	20505000	23498000
P61158	Actin-related protein 3	ACTR3	sp|P61158|ARP3_HUMAN Actin-related protein 3 OS=Homo sapiens OX=9606 GN=ACTR3 PE=1 SV=3	Homo sapiens	AGRLPACVVDCGTGYTK	9606	1	1	0	4.1	47.371	12549000	993730	1656500	810200	1360900	693500	0	785780	1030500	1048500	915880	1181200	2072700	993730	1177600	865970	1315400	463670	0	540210	638100	662520	788580	636960	1081300
Q9UKJ8	Disintegrin and metalloproteinase domain-containing protein 21	ADAM21	sp|Q9UKJ8|ADA21_HUMAN Disintegrin and metalloproteinase domain-containing protein 21 OS=Homo sapiens OX=9606 GN=ADAM21 PE=1 SV=2	Homo sapiens	LGEIFMLK	9606	1	1	1	1.1	80.833	344050	0	0	0	0	0	0	0	0	344050	0	0	0	0	0	0	0	0	0	0	0	0	0	0	0
Q61072	Disintegrin and metalloproteinase domain-containing protein 9	Adam9	sp|Q61072|ADAM9_MOUSE Disintegrin and metalloproteinase domain-containing protein 9 OS=Mus musculus OX=10090 GN=Adam9 PE=1 SV=2	Mus musculus	LANYLDSMYIMLNIR	10090	1	1	1	1.8	92.079	29533000	0	9273700	0	5329200	1327300	6162600	0	0	0	0	7440200	0	0	0	0	0	0	0	0	0	0	0	0	0
Q640N1	Adipocyte enhancer-binding protein 1	Aebp1	sp|Q640N1|AEBP1_MOUSE Adipocyte enhancer-binding protein 1 OS=Mus musculus OX=10090 GN=Aebp1 PE=1 SV=1	Mus musculus	KGEELEEEWAPVEK;TPSQEQLLAEALAAAR	10090	2	2	2	2.7	128.36	7251000	0	0	0	361530	0	0	1075000	4069300	1745300	0	0	0	0	0	0	349430	0	0	739030	2519800	0	0	0	0
A2ASQ1	Agrin	Agrn	sp|A2ASQ1|AGRIN_MOUSE Agrin OS=Mus musculus OX=10090 GN=Agrn PE=1 SV=1	Mus musculus	CEHPPPGPVCGSDGVTYLSACELR;DQCPETCQFNSVCLSR;EAACQQQVQIEEAR;FGSLCEVETGR;SIESTLDDLFR	10090	5	5	4	3.9	207.54	77664000	3059600	2398700	8103000	4216500	11234000	9881800	7195000	11922000	8173000	0	4296400	7184700	2160700	1052700	5201700	2289200	4934100	4509500	4181300	5928000	1453400	0	3122000	3050200
P23526	Adenosylhomocysteinase	AHCY	sp|P23526|SAHH_HUMAN Adenosylhomocysteinase OS=Homo sapiens OX=9606 GN=AHCY PE=1 SV=4	Homo sapiens	SDKLPYKVADIGLAAWGR	9606	1	1	0	4.2	47.716	15182000	504550	907530	0	968170	1130500	3266600	2761800	822980	1264700	758090	1192900	1604400	501680	622110	0	861310	714530	1919000	1935900	519620	814780	665530	655920	853470
Q09666	Neuroblast differentiation-associated protein AHNAK	AHNAK	sp|Q09666|AHNK_HUMAN Neuroblast differentiation-associated protein AHNAK OS=Homo sapiens OX=9606 GN=AHNAK PE=1 SV=2	Homo sapiens	ADIDVSGPKVDVDIPDVNIEGPDAK;ADLDVSGPKVDIDVPDVNIEGPEGK;AEGPEVDVNLPK;SEDGVEGDLGETQSR;VDIDVPDVNIEGPDAK;VDVDIPDVNIEGPDAK;VEGDLKGPEVDLKGPK;VKGDVDVSLPK	9606	8	8	8	4.8	629.09	240210000	24267000	17483000	11534000	10901000	33233000	14685000	32046000	2766300	31841000	18256000	23912000	19285000	15288000	6434500	5720700	9308500	8952100	4489900	6814300	3068200	4816900	7435200	5129800	4519600
P29699	Alpha-2-HS-glycoprotein	Ahsg	sp|P29699|FETUA_MOUSE Alpha-2-HS-glycoprotein OS=Mus musculus OX=10090 GN=Ahsg PE=1 SV=1	Mus musculus	HAFSPVASVESASGETLHSPK	10090	1	1	1	6.1	37.325	67405000	21562000	0	4505300	0	17437000	0	2503100	20401000	0	996690	0	0	23743000	0	5125900	0	10131000	0	1894900	10760000	0	1431700	0	0
Q9WTP7	GTP:AMP phosphotransferase AK3, mitochondrial	Ak3	sp|Q9WTP7|KAD3_MOUSE GTP:AMP phosphotransferase AK3, mitochondrial OS=Mus musculus OX=10090 GN=Ak3 PE=1 SV=3	Mus musculus	TLTQCSWLLDGFPR;TVGIDDLTGEPLIQR	10090	2	2	1	12.8	25.426	8711500	3531400	704790	0	0	1080400	0	0	2113800	0	266900	1014300	0	2112300	795650	0	0	1001800	0	0	916430	0	538830	831280	0
Q9UKA4	A-kinase anchor protein 11	AKAP11	sp|Q9UKA4|AKA11_HUMAN A-kinase anchor protein 11 OS=Homo sapiens OX=9606 GN=AKAP11 PE=1 SV=1	Homo sapiens	ATFRNNHMKTK	9606	1	1	1	0.6	210.51	147840000	0	0	0	0	0	0	0	0	0	0	147840000	0	0	0	0	0	0	0	0	0	0	0	0	0
Q9WTQ5	A-kinase anchor protein 12	Akap12	sp|Q9WTQ5|AKA12_MOUSE A-kinase anchor protein 12 OS=Mus musculus OX=10090 GN=Akap12 PE=1 SV=1	Mus musculus	CQETESNEEQSISPEKR;SDEDNKPDAGPDAAGKESAAR;VELPLEDQVGDLEALSEK	10090	3	3	3	3.3	180.69	44824000	4319400	1947400	1802200	6678000	2897100	8418500	1679500	1817300	1470700	493310	1667400	11633000	3208000	1586200	1287600	7926100	1401200	2338900	667650	754380	650510	789580	645430	2293800
Q9JII6	Alcohol dehydrogenase [NADP(+)]	Akr1a1	sp|Q9JII6|AK1A1_MOUSE Aldo-keto reductase family 1 member A1 OS=Mus musculus OX=10090 GN=Akr1a1 PE=1 SV=3	Mus musculus	AWRHPDEPVLLEEPVVLALAEK;GLEVTAYSPLGSSDR;TASSVLLHTGQK	10090	3	3	2	15.1	36.586	30423000	1357200	1244100	2304100	1834100	1780600	1787700	2066600	1898400	3976000	5204200	4007500	2962500	731910	850300	1772300	1704300	1144500	990190	1365900	1307400	1596100	2588200	2077600	857210
P45376	Aldose reductase	Akr1b1	sp|P45376|ALDR_MOUSE Aldo-keto reductase family 1 member B1 OS=Mus musculus OX=10090 GN=Akr1b1 PE=1 SV=3	Mus musculus	ASHLELNNGTK;TIGVSNFNPLQIER	10090	2	2	2	7.9	35.732	50382000	2757500	913550	4840400	4039900	6203000	2529800	9657800	4686700	3972500	740890	4901900	5137700	1649400	664110	2667200	2034200	1995900	1490400	4107500	2967600	1399600	652290	3068700	1624800
P07724	Serum albumin	Alb	sp|P07724|ALBU_MOUSE Albumin OS=Mus musculus OX=10090 GN=Alb PE=1 SV=3	Mus musculus	AADKDTCFSTEGPNLVTR;AETFTFHSDICTLPEK;AETFTFHSDICTLPEKEK;AFKAWAVAR;APQVSTPTLVEAAR;CCAEANPPACYGTVLAEFQPLVEEPK;CCAEANPPACYGTVLAEFQPLVEEPKNLVK;CCSGSLVER;CCTLPEDQR;CCTLPEDQRLPCVEDYLSAILNR;DTCFSTEGPNLVTR;EFKAETFTFHSDICTLPEKEK;ENYGELADCCTK;GLVLIAFSQYLQK;KQTALAELVK;LAKKYEATLEK;LCAIPNLRENYGELADCCTK;LGEYGFQNAILVR;LGEYGFQNAILVRYTQKAPQVSTPTLVEAAR;LQTCCDKPLLK;LQTCCDKPLLKK;LSQTFPNADFAEITK;LSQTFPNADFAEITKLATDLTK…	10090	43	43	40	59.4	68.692	7993300000	526700000	416360000	449740000	616890000	507280000	632670000	641010000	1421100000	968150000	463310000	642060000	707990000	98449000	44345000	100150000	101070000	59788000	74424000	59885000	111540000	95476000	76590000	64726000	67772000
P24549	Retinal dehydrogenase 1	Aldh1a1	sp|P24549|AL1A1_MOUSE Retinal dehydrogenase 1 OS=Mus musculus OX=10090 GN=Aldh1a1 PE=1 SV=5	Mus musculus	ANNTTYGLAAGLFTK	10090	1	1	1	3	54.467	3337600	0	0	420310	0	0	0	1904900	0	342410	669980	0	0	0	0	352440	0	0	0	1376600	0	216540	606410	0	0
P47738	Aldehyde dehydrogenase, mitochondrial	Aldh2	sp|P47738|ALDH2_MOUSE Aldehyde dehydrogenase, mitochondrial OS=Mus musculus OX=10090 GN=Aldh2 PE=1 SV=1	Mus musculus	ANDSKYGLAAAVFTK;EAGFPPGVVNIVPGFGPTAGAAIASHEGVDK;ELGEYGLQAYTEVK;GYFIQPTVFGDVK;LLCGGGAAADRGYFIQPTVFGDVK;TFVQENVYDEFVER;VAEQTPLTALYVANLIK;VAFTGSTEVGHLIQVAAGSSNLKR;YGLAAAVFTK	10090	9	9	7	26.8	56.537	187500000	5784500	9280200	7377400	12024000	12699000	14611000	11914000	28214000	19514000	6846100	22908000	36332000	2870500	2723600	3078300	4252800	3183100	3173500	3724800	4057100	3818500	2578500	5008600	6042400
Q9EQ20	Methylmalonate-semialdehyde dehydrogenase [acylating], mitochondrial	Aldh6a1	sp|Q9EQ20|MMSA_MOUSE Methylmalonate-semialdehyde dehydrogenase [acylating], mitochondrial OS=Mus musculus OX=10090 GN=Aldh6a1 PE=1 SV=1	Mus musculus	AFPAWADTSILSR;AISFVGSNQAGEYIFER;VNAGDQPGADLGPLITPQAK	10090	3	3	2	9.3	57.915	47657000	1127400	5702700	3474600	2095300	4757600	6633400	4036400	5389500	1567400	5066500	4287900	3518100	1082300	2282500	2273200	1227900	2090300	3743900	1837100	1656800	1897200	2841300	1411000	1798000
P05064	Fructose-bisphosphate aldolase A	Aldoa	sp|P05064|ALDOA_MOUSE Fructose-bisphosphate aldolase A OS=Mus musculus OX=10090 GN=Aldoa PE=1 SV=2	Mus musculus	AAQEEYIKR;ALANSLACQGK;ELSDIAHRIVAPGKGILAADESTGSIAK;ENLKAAQEEYIKR;GGVVGIKVDKGVVPLAGTNGETTTQGLDGLSER;GILAADESTGSIAK;GILAADESTGSIAKR;GVVPLAGTNGETTTQGLDGLSER;IGEHTPSALAIMENANVLAR;IVAPGKGILAADESTGSIAK;IVAPGKGILAADESTGSIAKR;LQSIGTENTEENR;LQSIGTENTEENRR;LQSIGTENTEENRRFYR;RLQSIGTENTEENR;RLQSIGTENTEENRR;VDKGVVPLAGTNGETTTQGLDGLSER;YASICQQNGIVPIVEPEILPDGDHDLK;YASICQQNGIVPIVEPEILPDGDHDLKR	10090	19	19	2	41.5	39.355	1275900000	45053000	37360000	50925000	67232000	77347000	169990000	103040000	146380000	110560000	127110000	253660000	87291000	29525000	19005000	16988000	20735000	31110000	38094000	24587000	25347000	15287000	35121000	22748000	15051000
P39655	Arachidonate 12-lipoxygenase, 12S-type	Alox12	sp|P39655|LOX12_MOUSE Polyunsaturated fatty acid lipoxygenase ALOX12 OS=Mus musculus OX=10090 GN=Alox12 PE=1 SV=4	Mus musculus	AVLSQFQADLDNLEK	10090	1	1	1	2.3	75.389	7690600	0	0	0	0	0	0	0	2437200	0	0	3907000	1346300	0	0	0	0	0	0	0	1509200	0	0	2106900	702390
P09242	Alkaline phosphatase, tissue-nonspecific isozyme	Alpl	sp|P09242|PPBT_MOUSE Alkaline phosphatase, tissue-nonspecific isozyme OS=Mus musculus OX=10090 GN=Alpl PE=1 SV=2	Mus musculus	ANEGTVGVSAATER;DAGKSVGIVTTTR;GTRLDGLDLISIWK;ILKGQLHHNTGEETR;TYNTNAQVPDSAGTATAYLCGVKANEGTVGVSAATER	10090	5	5	2	15.1	57.514	55942000	2529200	2131000	1902000	11768000	2746000	3422500	5635200	2249000	5984500	4328400	11369000	1877400	2416900	845600	1190500	5667500	1249000	1246100	1931000	1744700	1954300	2447600	1550700	786920
Q9JJW6	Aly/REF export factor 2	Alyref2	sp|Q9JJW6|ALRF2_MOUSE Aly/REF export factor 2 OS=Mus musculus OX=10090 GN=Alyref2 PE=1 SV=1;sp|O08583|THOC4_MOUSE THO complex subunit 4 OS=Mus musculus OX=10090 GN=Alyref PE=1 SV=3	Mus musculus	SLGTADVHFER	10090	1	1	0	5	23.73	34858000	1248000	662310	3994800	3279200	1285600	6577700	1029500	3149700	12339000	1292500	0	0	1256600	474130	3973500	3191500	977380	3816000	712680	2001800	7850800	1120600	0	0
P97449	Aminopeptidase N	Anpep	sp|P97449|AMPN_MOUSE Aminopeptidase N OS=Mus musculus OX=10090 GN=Anpep PE=1 SV=4	Mus musculus	ALEQALEKTR;AQIIHDSFNLASAK;AVNQQTAVQPPATVR;DAVFKWFTENSS;FSSEFELQQLEQFKADNSATGFGTGTR;KQDTTSTIISIASNVAGHPLVWDFVR;LFENYGGGSFSFANLIQGVTRR;LQNQLQTDLSVIPVINR;RFSSEFELQQLEQFKADNSATGFGTGTR	10090	9	9	9	14.8	109.65	172040000	9517900	13076000	6304300	4621800	46327000	7920700	8742300	21123000	13388000	12415000	13114000	15494000	6786900	6058600	2974500	3333600	13576000	3899200	3856400	6393000	4929900	4212400	3933300	5051800
P10107	Annexin A1	Anxa1	sp|P10107|ANXA1_MOUSE Annexin A1 OS=Mus musculus OX=10090 GN=Anxa1 PE=1 SV=2	Mus musculus	AAYLQENGKPLDEVLRK;ALDLELKGDIEK;ALLALAKGDRCQDLSVNQDLADTDAR;CQDLSVNQDLADTDAR;DITSDTSGDFRK;DLAKDITSDTSGDFRK;GLGTDEDTLIEILTTR;GLGTDEDTLIEILTTRSNEQIR;GTDVNVFTTILTSR;GVDEATIIDILTK;GVDEATIIDILTKR;KGTDVNVFTTILTSR;RKGTDVNVFTTILTSR;TPAQFDADELR	10090	14	14	11	38.7	38.734	422870000	12732000	33481000	17476000	35057000	36948000	45830000	32805000	68924000	61400000	19137000	34519000	24564000	5589200	9540400	10096000	11777000	12330000	11308000	9166300	8286200	7211400	7839900	7504800	8881100
P97384	Annexin A11	Anxa11	sp|P97384|ANX11_MOUSE Annexin A11 OS=Mus musculus OX=10090 GN=Anxa11 PE=1 SV=2	Mus musculus	DVQELYAAGENR;GTITAASGFDPLRDAEVLRK	10090	2	2	2	6.4	54.079	46168000	809400	0	2895500	1954800	1416900	6090900	3122600	17952000	7233000	697980	3995100	0	1319900	0	3581000	2186200	1544800	4060600	2243500	6023400	2659300	810210	2492800	0
P07356	Annexin A2	Anxa2	sp|P07356|ANXA2_MOUSE Annexin A2 OS=Mus musculus OX=10090 GN=Anxa2 PE=1 SV=2	Mus musculus	AEDGSVIDYELIDQDAR;ALLYLCGGDD;DALNIETAVK;DALNIETAVKTK;DIISDTSGDFRK;DIISDTSGDFRKLMVALAK;ELYDAGVKR;GLGTDEDSLIEIICSR;GRRAEDGSVIDYELIDQDAR;GVDEVTIVNILTNR;GVDEVTIVNILTNRSNVQR;GVDEVTIVNILTNRSNVQRQDIAFAYQR;KGTDVPKWISIMTER;LSLEGDHSTPPSAYGSVKPYTNFDAER;QDIAFAYQR;RAEDGSVIDYELIDQDAR;SALSGHLETVILGLLK;SALSGHLETVILGLLKTPAQYDASELK;SLYYYIQQDTKGDYQK;SNVQRQDIAFAYQR;SNVQRQDIAFAYQRR;STVHEILCK;SVCHLQKVFER;TDLEKDIISDTSG…	10090	29	29	9	71.1	38.676	2450000000	120890000	146610000	128210000	170810000	192980000	208130000	166480000	282820000	240390000	129980000	355180000	307530000	16340000	24529000	24415000	22971000	21970000	18163000	18654000	23614000	22449000	17160000	31480000	26718000
O35639	Annexin A3	Anxa3	sp|O35639|ANXA3_MOUSE Annexin A3 OS=Mus musculus OX=10090 GN=Anxa3 PE=1 SV=4	Mus musculus	AIRGLGTDEKTLINILTER;ALLTLADGRR;ASIWVGPR;ASIWVGPRGTIK;DAQILYNAGENKWGTDEDKFTEVLCLR;DESLKVDEHLAKK;GLGTDEKTLINILTER;GTGTDEDALIEILTTR;GTIKDYPGFSPSVDAEAIR;GTIKDYPGFSPSVDAEAIRK;LHQALKGAGTDEFTLNR;SFPQLKLTFDEYR;SLGDDISSETSGDFRK	10090	13	13	10	49.2	36.384	351510000	7116000	12107000	5868700	23350000	32105000	10599000	22501000	114730000	31542000	6842000	37656000	47089000	3631700	8435500	6786500	8558000	16892000	7172400	5636300	7921000	13696000	5702300	9415600	13405000
P97429	Annexin A4	Anxa4	sp|P97429|ANXA4_MOUSE Annexin A4 OS=Mus musculus OX=10090 GN=Anxa4 PE=1 SV=4	Mus musculus	AASGFNATEDAQTLR;AASGFNATEDAQTLRK;GGTVKAASGFNATEDAQTLRK;GLGTDEDAIIGILAYR;INQTYQQQYGR;SETSGSFEDALLAIVK	10090	6	6	5	20.1	35.915	70116000	3814600	6341000	2226700	21589000	3518700	5358800	2768600	4693300	5670400	2508100	4964500	6663200	3950000	3732000	2815600	6585700	3428000	2332600	1697200	2381600	2785300	1737400	2132400	2878500
P48036	Annexin A5	Anxa5	sp|P48036|ANXA5_MOUSE Annexin A5 OS=Mus musculus OX=10090 GN=Anxa5 PE=1 SV=1	Mus musculus	AMKGLGTDEDSILNLLTSR;ATRGTVTDFPGFDGR;ATRGTVTDFPGFDGRADAEVLR;DLVDDLKSELTGK;DLVDDLKSELTGKFEK;GAGTDDHTLIR;GAGTDEKVLTEIIASR;GLGTDEDSILNLLTSR;GLGTDEDSILNLLTSRSNAQR;GTVTDFPGFDGR;GTVTDFPGFDGRADAEVLR;GTVTDFPGFDGRADAEVLRK;HALKGAGTDEKVLTEIIASR;LYDAYELKHALKGAGTDEK;NFATSLYSMIKGDTSGDYKK;QEIAQEFKTLFGR;SEIDLFNIRK;SNAQRQEIAQEFK;SNAQRQEIAQEFKTLFGR;TPEELSAIK;TPEELSAIKQVYEEEYGSNLEDDVVGDTSGYYQR;VLTEIIASRTPEELSAIK;WGT…	10090	23	23	19	60.8	35.752	2776100000	157800000	294530000	194330000	127870000	332370000	213320000	153240000	253610000	215330000	175370000	287440000	370930000	44292000	43732000	50763000	32766000	75350000	31631000	38936000	57186000	44099000	25412000	43006000	68718000
P14824	Annexin A6	Anxa6	sp|P14824|ANXA6_MOUSE Annexin A6 OS=Mus musculus OX=10090 GN=Anxa6 PE=1 SV=3	Mus musculus	ALLALCGGED;CLIEILASR;DLESDIIGDTSGHFQK;DLIEDLKYELTGKFER;DQAQEDAQVAAEILEIADTPSGDKTSLETR;EIKDAISGVGTDEK;GFGSDKESILELITSR;GIGTDEATIIDIVTHR;GIGTDEATIIDIVTHRSNAQR;GLGTRDNTLIR;GSVHDFPEFDANQDAEALYTAMK;GTVCAANDFNPDADAK;ILISLATGNR;NKPLFFADKLYK;SEIDLLNIRR;WGTDEAQFIYILGNR	10090	16	16	10	34	75.884	369840000	16633000	30082000	17013000	15521000	28654000	22453000	40851000	56914000	55202000	4061900	39306000	43147000	11220000	5905500	5745800	5321800	6828500	5090700	8508200	9581300	5849000	1162900	7347500	9206500
Q07076	Annexin A7	Anxa7	sp|Q07076|ANXA7_MOUSE Annexin A7 OS=Mus musculus OX=10090 GN=Anxa7 PE=1 SV=2	Mus musculus	GFGTDEQAIVDVVSNR	10090	1	1	1	3.5	49.925	20815000	1373600	812810	1260300	1678900	978830	2109400	1705300	2096300	1128500	2810600	1963900	2896400	1373600	577860	1347100	1622700	654440	1215300	1172300	1298100	713090	2420000	1059000	1511100
O70423	Membrane primary amine oxidase	Aoc3	sp|O70423|AOC3_MOUSE Membrane primary amine oxidase OS=Mus musculus OX=10090 GN=Aoc3 PE=1 SV=3	Mus musculus	AAALAHLDR;DAFCVFEQNQGLPLR;DAFCVFEQNQGLPLRR;EGQDATACEVNPLACLSQTATCAPEIPAFSHGGFAYR;EGQDATACEVNPLACLSQTATCAPEIPAFSHGGFAYRDN;EYQDIEEMIFHR;GVDCPYLATYVDWHFLLESQAPK;GYRIQILSFAGKPLPQESPIEK;HGGPLPYYR;HLGPGLVDAAQARPSDNCVFSVELQLPAK;IQILSFAGKPLPQESPIEK;KLLETEEEAAFPLGGATPR;LLETEEEAAFPLGGATPR;SSVPPGPAPPLQFHPQGPR;YHLAVTQR	10090	15	15	11	26.8	84.533	1750000000	46932000	173120000	81988000	179410000	78440000	142060000	110360000	77052000	210450000	87503000	223310000	339390000	21806000	22396000	21275000	34609000	15136000	15906000	15654000	15692000	33086000	19053000	29231000	38286000
Q00623	Apolipoprotein A-I	Apoa1	sp|Q00623|APOA1_MOUSE Apolipoprotein A-I OS=Mus musculus OX=10090 GN=Apoa1 PE=1 SV=2	Mus musculus	ARPALEDLR;VAPLGAELQESAR	10090	2	2	2	8.3	30.615	56476000	2483600	1893200	2274100	2789700	8173400	3641400	2239500	8659100	9876300	1955300	8806500	3684100	1458400	1301600	2201200	2826100	5023100	2198900	1469000	4553900	4929700	1592000	4977400	1482400
Q8K4Z3	NAD(P)H-hydrate epimerase	Apoa1bp	sp|Q8K4Z3|NNRE_MOUSE NAD(P)H-hydrate epimerase OS=Mus musculus OX=10090 GN=Naxe PE=1 SV=1	Mus musculus	GNPSGIQPDLLISLTAPK	10090	1	1	1	6.4	30.972	9470800	565540	0	0	372140	1244800	466420	1010400	1451300	967100	477370	1517300	1398300	565540	0	0	359690	832280	268730	694640	898710	611080	411020	818210	729500
Q99PT1	Rho GDP-dissociation inhibitor 1	Arhgdia	sp|Q99PT1|GDIR1_MOUSE Rho GDP-dissociation inhibitor 1 OS=Mus musculus OX=10090 GN=Arhgdia PE=1 SV=3	Mus musculus	AEEYEFLTPMEEAPK;AEQEPTAEQLAQIAAENEEDEHSVNYKPPAQK;VAVSADPNVPNVIVTR	10090	3	3	2	30.9	23.407	232080000	1562400	27757000	22425000	5043700	10567000	27441000	9522100	11738000	22329000	42199000	31760000	19734000	13177000	16429000	13209000	4925500	9422300	16082000	6449500	7223600	11885000	28616000	15141000	8908300
Q99MQ4	Asporin	Aspn	sp|Q99MQ4|ASPN_MOUSE Asporin OS=Mus musculus OX=10090 GN=Aspn PE=1 SV=1	Mus musculus	EIHLEHNKLK;ENDFKGLTSLYALILNNNKLTK;KIPSGLQELK;LYLSHNQLSEIPLNLPK;RLYLSHNQLSEIPLNLPK;VGVNDFCPTVPK;VVHCSDLGLTSVPNNIPFDTR	10090	7	7	4	24.9	42.572	830580000	112340000	72746000	61933000	61546000	43651000	84259000	18997000	140980000	41132000	47561000	89931000	55504000	75614000	20294000	35469000	40066000	22411000	30030000	20198000	44167000	21767000	29453000	23966000	26421000
Q2TAZ0	Autophagy-related protein 2 homolog A	ATG2A	sp|Q2TAZ0|ATG2A_HUMAN Autophagy-related protein 2 homolog A OS=Homo sapiens OX=9606 GN=ATG2A PE=1 SV=3	Homo sapiens	MSRWLWPWSNCVK	9606	1	1	0	0.7	212.86	5912900	586600	0	0	0	680600	0	408130	0	1629700	712040	876880	1019000	595010	0	0	0	524060	0	411510	0	788350	608290	475830	566430
Q9CWJ9	Bifunctional purine biosynthesis protein PURH	Atic	sp|Q9CWJ9|PUR9_MOUSE Bifunctional purine biosynthesis protein ATIC OS=Mus musculus OX=10090 GN=Atic PE=1 SV=2	Mus musculus	APSQLALFSVSDKTGLVEFAR	10090	1	1	1	3.5	64.217	14176000	1265100	2185900	1239500	0	0	1517700	0	1818200	2183700	1052000	1194000	1719700	1183500	1624300	1225200	0	0	897150	0	1176800	1198200	921210	713130	937730
Q91YH5	Atlastin-3	Atl3	sp|Q91YH5|ATLA3_MOUSE Atlastin-3 OS=Mus musculus OX=10090 GN=Atl3 PE=1 SV=1	Mus musculus	ELGGAIDSGAAYVLEQASSHIGNSTQAAVR	10090	1	1	1	5.5	60.574	11266000	0	0	0	503020	4080000	2954100	0	909840	1501800	0	0	1317100	0	0	0	745420	2353700	1718600	0	510740	1164200	0	0	622910
Q8VDN2	Sodium/potassium-transporting ATPase subunit alpha-1	Atp1a1	sp|Q8VDN2|AT1A1_MOUSE Sodium/potassium-transporting ATPase subunit alpha-1 OS=Mus musculus OX=10090 GN=Atp1a1 PE=1 SV=1	Mus musculus	AIAKGVGIISEGNETVEDIAAR;AIAKGVGIISEGNETVEDIAARLNIPVNQVNPR;AVAGDASESALLK;AVFQANQENLPILK;AVFQANQENLPILKR;DAFQNAYLELGGLGER;GVGIISEGNETVEDIAAR;GVGIISEGNETVEDIAARLNIPVNQVNPR;IISANGCKVDNSSLTGESEPQTR;IVEIPFNSTNKYQLSIHKNPNASEPK;LNIPVNQVNPR;MSINAEDVVVGDLVEVK;NIAFFSTNCVEGTAR;NLEAVETLGSTSTICSDKTGTLTQNR;QGAIVAVTGDGVNDSPALK;QGAIVAVTGDGVNDSPALKK;SPDFTNENPLETR;VDNSSLTGESEPQTR;YHTEIVFAR	10090	19	19	5	22.1	112.98	1123900000	34068000	129010000	56054000	65530000	65341000	123290000	78989000	97144000	139490000	106660000	136750000	91548000	12184000	17342000	18263000	17484000	15110000	20463000	18797000	15196000	14925000	22713000	23896000	15814000
Q6PIE5	Sodium/potassium-transporting ATPase subunit alpha-2	Atp1a2	sp|Q6PIE5|AT1A2_MOUSE Sodium/potassium-transporting ATPase subunit alpha-2 OS=Mus musculus OX=10090 GN=Atp1a2 PE=1 SV=1;sp|Q6PIC6|AT1A3_MOUSE Sodium/potassium-transporting ATPase subunit alpha-3 OS=Mus musculus OX=10090 GN=Atp1a3 PE=1 SV=1	Mus musculus	AIAKGVGIISEGNETVEDIAAR;DHTEIVFAR;GVGIISEGNETVEDIAAR;GVGIISEGNETVEDIAARLNIPVSQVNPR;IISSHGCKVDNSSLTGESEPQTR;KYQVDLSK;LNIPVSQVNPR;NLEAVETLGSTSTICSDKTGTLTQNR;QGAIVAVTGDGVNDSPALK;QGAIVAVTGDGVNDSPALKK;SPEFTHENPLETR;VDNSSLTGESEPQTR	10090	12	4	1	12.9	112.22	72655000	2310700	7552000	1252800	4607300	4774900	3143600	5331600	5155200	11887000	5370600	13827000	7442200	1567900	5105200	1785300	2668600	1841500	1096200	714190	3430500	2221100	7785100	3772100	2086200
P14094	Sodium/potassium-transporting ATPase subunit beta-1	Atp1b1	sp|P14094|AT1B1_MOUSE Sodium/potassium-transporting ATPase subunit beta-1 OS=Mus musculus OX=10090 GN=Atp1b1 PE=1 SV=1	Mus musculus	SYEAYVLNIIR;TEISFRPNDPKSYEAYVLNIIR;VAPPGLTQIPQIQK;YNPNVLPVQCTGKR	10090	4	4	2	16.4	35.194	384570000	11515000	50124000	16874000	29626000	24875000	22787000	58781000	22714000	44149000	31009000	42172000	29946000	8005200	17721000	13066000	23956000	8942500	8738500	23454000	14911000	13425000	16145000	8860100	9862400
P97370	Sodium/potassium-transporting ATPase subunit beta-3	Atp1b3	sp|P97370|AT1B3_MOUSE Sodium/potassium-transporting ATPase subunit beta-3 OS=Mus musculus OX=10090 GN=Atp1b3 PE=1 SV=1	Mus musculus	ACQFPVSLLEECSGVTDANFGYSKGQPCILVK;IIDLIPDGYPQISCLPK	10090	2	2	2	17.6	31.775	29944000	1627700	0	2711400	1582000	5525300	1832500	6519900	2027100	3666200	0	4066300	385450	1325100	0	1768100	1273400	769410	1661300	7053100	1777500	1918100	0	1408300	292990
Q8R429	Sarcoplasmic/endoplasmic reticulum calcium ATPase 1	Atp2a1	sp|Q8R429|AT2A1_MOUSE Sarcoplasmic/endoplasmic reticulum calcium ATPase 1 OS=Mus musculus OX=10090 GN=Atp2a1 PE=1 SV=1	Mus musculus	AEIGIAMGSGTAVAK;AGQYDGLVELATICALCNDSSLDFNETKGVYEK;ANACNSVIR;AVGIVATTGVSTEIGK;AVGIVATTGVSTEIGKIR;AVNQDKKNMLFSGTNIAAGK;AYTGREFDDLPLAEQR;DIVPGDIVEVAVGDKVPADIRILSIK;EFDDLPLAEQR;GAPEGVIDRCNYVR;IGIFSENEEVTDR;IMSVIKEWGTGRDTLR;IVEYLQSYDEITAMTGDGVNDAPALKK;MNVFNTEVR;NMLFSGTNIAAGK;RACCFAR;RIGIFSENEEVTDR;SLPSVETLGCTSVICSDK;STEECLSYFGVSETTGLTPDQVK;STEECLSYFGVSETTGLTPDQVKR;STEECLSYFGVSETTGLTPDQVKRHLEK;VDQSILTG…	10090	28	28	13	32.9	109.42	3605000000	94244000	357170000	134100000	155640000	209400000	536550000	374930000	333590000	229010000	511570000	294330000	374460000	31936000	88781000	38345000	51460000	60024000	64238000	60597000	64324000	44953000	126740000	71988000	57488000
P16615	Sarcoplasmic/endoplasmic reticulum calcium ATPase 2	ATP2A2	sp|P16615|AT2A2_HUMAN Sarcoplasmic/endoplasmic reticulum calcium ATPase 2 OS=Homo sapiens OX=9606 GN=ATP2A2 PE=1 SV=1	Homo sapiens	AEIGIAMGSGTAVAK;AVNQDKKNMLFSGTNIAAGK;IGIFGQDEDVTSK;NMLFSGTNIAAGK;SLPSVETLGCTSVICSDK;TVEEVLGHFGVNESTGLSLEQVKK;VDQSILTGESVSVIK;VGEATETALTCLVEK	9606	8	3	0	11.5	114.76	58225000	2369500	1545400	5529200	3341000	2791200	13286000	4318400	9375200	5434500	2591100	5079800	2563400	1842700	1604000	2596000	1504200	1535400	3181700	1861800	2678200	1412700	1594400	1965400	1820500
Q64518	Sarcoplasmic/endoplasmic reticulum calcium ATPase 3	Atp2a3	sp|Q64518|AT2A3_MOUSE Sarcoplasmic/endoplasmic reticulum calcium ATPase 3 OS=Mus musculus OX=10090 GN=Atp2a3 PE=1 SV=4	Mus musculus	AEIGIAMGSGTAVAK;ARDIVPGDIVEVAVGDKVPADLR;DIVPGDIVEVAVGDKVPADLR;SLPSVETLGCTSVICSDK;VGEATETALTCLVEK	10090	5	2	0	7.1	109.53	111900000	17901000	8792800	3849500	1840900	14985000	5539600	7815500	17812000	4380900	7609700	10862000	10510000	10433000	3870300	3009500	2881100	7377700	1788100	3818800	6000200	2036700	4778400	4437300	4135000
Q6Q477	Calcium-transporting ATPase	Atp2b4	sp|Q6Q477|AT2B4_MOUSE Plasma membrane calcium-transporting ATPase 4 OS=Mus musculus OX=10090 GN=Atp2b4 PE=1 SV=1;sp|Q9R0K7|AT2B2_MOUSE Plasma membrane calcium-transporting ATPase 2 OS=Mus musculus OX=10090 GN=Atp2b2 PE=1 SV=2;sp|G5E829|AT2B1_MOUSE Plasma m	Mus musculus	QVVAVTGDGTNDGPALK	10090	1	1	0	1.4	133.07	12173000	0	0	765900	1268000	0	1288100	2723100	830670	1249800	647220	920550	2480000	0	0	753010	1269900	0	850160	1782200	473150	726430	512600	616280	1326200
Q03265	ATP synthase subunit alpha, mitochondrial	Atp5a1	sp|Q03265|ATPA_MOUSE ATP synthase subunit alpha, mitochondrial OS=Mus musculus OX=10090 GN=Atp5f1a PE=1 SV=1	Mus musculus	EAYPGDVFYLHSR;ELIIGDRQTGK;FENAFLSHVISQHQSLLGNIR;HALIIYDDLSK;ILGADTSVDLEETGR;ILGADTSVDLEETGRVLSIGDGIAR;LKEIVTNFLAGFEP;TGAIVDVPVGEELLGR;TGAIVDVPVGEELLGRVVDALGNAIDGKGPIGSK;TSIAIDTIINQK;TSIAIDTIINQKR;VGLKAPGIIPR;VVDALGNAIDGKGPIGSK	10090	13	13	2	27.7	59.752	1181500000	105360000	87692000	39589000	35476000	113490000	102440000	143240000	110980000	58133000	148240000	134570000	102280000	41051000	21906000	16506000	15530000	25802000	22400000	45005000	32951000	14264000	38962000	29261000	20998000
P56480	ATP synthase subunit beta, mitochondrial	Atp5b	sp|P56480|ATPB_MOUSE ATP synthase subunit beta, mitochondrial OS=Mus musculus OX=10090 GN=Atp5f1b PE=1 SV=2	Mus musculus	AHGGYSVFAGVGER;AIAELGIYPAVDPLDSTSR;DSRLVLEVAQHLGESTVR;EGNDLYHEMIESGVINLK;EGNDLYHEMIESGVINLKDATSK;FLSQPFQVAEVFTGHMGK;FTQAGSEVSALLGR;GQKVLDSGAPIKIPVGPETLGR;GSITSVQAIYVPADDLTDPAPATTFAHLDATTVLSR;GVQKILQDYK;IMDPNIVGNEHYDVAR;IMNVIGEPIDERGPIKTK;ITTTKKGSITSVQAIYVPADDLTDPAPATTFAHLDATTVLSR;KGSITSVQAIYVPADDLTDPAPATTFAHLDATTVLSR;LVLEVAQHLGESTVR;TIAMDGTEGLVR;TREGNDLYHEMIESGVINLKDATSK;TVLIMELINNVAK;VALTGLTVAEY…	10090	20	20	2	48	56.3	5673900000	275770000	284830000	282910000	371270000	417040000	1109500000	468800000	352260000	416460000	561620000	611150000	522290000	111230000	73557000	116220000	116360000	122740000	120560000	115870000	94417000	82999000	164700000	121150000	131850000
Q9D3D9	ATP synthase subunit delta, mitochondrial	Atp5d	sp|Q9D3D9|ATPD_MOUSE ATP synthase subunit delta, mitochondrial OS=Mus musculus OX=10090 GN=Atp5f1d PE=1 SV=1	Mus musculus	ANLEKAQSELSGAADEAAR;ANLEKAQSELSGAADEAARAEIQIR;AQSELSGAADEAAR;IEANEALVK;IEANEALVKALE	10090	5	5	3	22	17.6	402940000	18683000	40936000	13811000	18472000	32725000	58680000	36841000	55459000	28069000	42077000	17408000	39774000	14456000	38565000	6274100	14609000	7884600	11053000	9874600	13739000	9816800	17975000	8124200	14288000
Q9DCX2	ATP synthase subunit d, mitochondrial	Atp5h	sp|Q9DCX2|ATP5H_MOUSE ATP synthase subunit d, mitochondrial OS=Mus musculus OX=10090 GN=Atp5pd PE=1 SV=3	Mus musculus	IQEYEKQLEK;LASLSEKPPAIDWAYYR;SCAEFVSGSQLR	10090	3	3	3	24.2	18.749	76724000	2186100	7749800	1690200	3943800	5353900	9785900	2678900	1400400	10541000	8195200	6644500	16554000	1248200	4299100	1430900	1376900	1937700	6012600	897250	1564900	2306200	3941200	3205700	3803900
Q06185	ATP synthase subunit e, mitochondrial	Atp5i	sp|Q06185|ATP5I_MOUSE ATP synthase subunit e, mitochondrial OS=Mus musculus OX=10090 GN=Atp5me PE=1 SV=2	Mus musculus	ELAEAQDDSILK;IERELAEAQDDSILK	10090	2	2	2	21.1	8.2355	204490000	7349200	22191000	6107700	18435000	12491000	34843000	11979000	13749000	15780000	16981000	17868000	26710000	7858200	13315000	5158000	13935000	9435300	17616000	6879800	6558500	6924300	11629000	6693200	8910400
P97450	ATP synthase-coupling factor 6, mitochondrial	Atp5j	sp|P97450|ATP5J_MOUSE ATP synthase-coupling factor 6, mitochondrial OS=Mus musculus OX=10090 GN=Atp5pf PE=1 SV=1	Mus musculus	QASGGPVDIGPEYQQDLDR	10090	1	1	1	17.6	12.496	33251000	1006600	3464800	1679300	1304000	2369600	3367500	4044500	1933300	4519200	2696000	2534900	4331800	1006600	2463300	1794900	1260300	1584300	1940200	2780500	1197100	2855500	2321300	1366900	2259900
B1B0V2	inhibitory protein OS=Mus musculus	AU022751	sp|B1B0V2|EZHIP_MOUSE EZH inhibitory protein OS=Mus musculus OX=10090 GN=Ezhip PE=1 SV=1	Mus musculus	MASSSSPERGLEALR	10090	1	1	1	2.5	61.797	45071000	0	0	2127300	1412500	0	5268000	3610400	0	18358000	0	9474500	4820300	0	0	2378900	1471000	0	2884000	2522100	0	12498000	0	4081200	2544200
Q91XV3	Brain acid soluble protein 1	Basp1	sp|Q91XV3|BASP1_MOUSE Brain acid soluble protein 1 OS=Mus musculus OX=10090 GN=Basp1 PE=1 SV=3	Mus musculus	AEPEKSEGAAEEQPEPAPAPEQEAAAPGPAAGGEAPK	10090	1	1	1	16.4	22.086	24102000	0	0	0	3103700	0	13761000	4946600	0	0	0	2291400	0	0	0	0	2999800	0	7928300	3400700	0	0	0	1235600	0
Q9R069	Basal cell adhesion molecule	Bcam	sp|Q9R069|BCAM_MOUSE Basal cell adhesion molecule OS=Mus musculus OX=10090 GN=Bcam PE=1 SV=1	Mus musculus	AGAAGTSEATSSVR;EASGLYSLTSTLYLR;EGDAVQLLCQGDGSPSPEYSFFR;EGVSCEASNIHGK;EHPEHYVLEWFLVDGTGAR;GEQVALDCTPR;LASVEPQGSEFLGTVHSLGR;LTLHYPTEHVEFWVGSPSTTEGWVR;LTWSQRGDTPAEPPFEGR;LTWSQRGDTPAEPPFEGRGWK;SGNSWTEGDEVMLTCSAR;TQSFQLIVQGAPELKPNEIMPK;VEDYDADEEVQLVK;VEDYDADEEVQLVKK;VFATPEDTEVSPNKGTLSVMDQFAQEIATCSSNNGNPVPR	10090	15	15	15	41.2	67.669	558380000	19637000	23996000	39425000	29326000	33799000	61971000	70817000	48971000	64733000	33467000	60465000	71771000	8037800	5806700	12062000	9905700	12781000	13612000	10686000	7059700	11013000	8010200	7616100	10830000
Q3B7T3	Protein BEAN1	BEAN1	sp|Q3B7T3|BEAN1_HUMAN Protein BEAN1 OS=Homo sapiens OX=9606 GN=BEAN1 PE=2 SV=2	Homo sapiens	MSFKRPCPLAR	9606	1	1	0	4.2	28.625	4973500	0	0	0	0	2938500	0	0	1186800	0	848250	0	0	0	0	0	0	0	0	0	0	0	0	0	0
P28653	Biglycan	Bgn	sp|P28653|PGS1_MOUSE Biglycan OS=Mus musculus OX=10090 GN=Bgn PE=1 SV=1	Mus musculus	CVTDRLAIQFGNYK;DDFKGLQHLYALVLVNNK;DDFKGLQHLYALVLVNNKISK;DLPETLNELHLDHNKIQAIELEDLLR;EISPDTTLLDLQNNDISELR;EISPDTTLLDLQNNDISELRK;ELHLDNNK;ELHLDNNKLSR;IQAIELEDLLR;ISEAKLTGIPK;LGLGHNQIR;LYISKNHLVEIPPNLPSSLVELR;NHLVEIPPNLPSSLVELR;RAYYNGISLFNNPVPYWEVQPATFR;TVPKEISPDTTLLDLQNNDISELR;TVPKEISPDTTLLDLQNNDISELRK;VVQCSDLGLK;VVQCSDLGLKTVPK	10090	18	17	4	47.4	41.639	2120100000	109420000	166990000	137860000	103920000	209680000	154210000	232330000	208920000	219720000	107040000	308850000	161110000	43373000	36832000	43878000	31405000	39555000	24748000	42094000	36581000	36799000	25532000	42469000	30739000
P55201	Peregrin	BRPF1	sp|P55201|BRPF1_HUMAN Peregrin OS=Homo sapiens OX=9606 GN=BRPF1 PE=1 SV=2	Homo sapiens	VQQIAMEMQLTPFLILLRK	9606	1	1	1	1.6	137.5	8241700	1864400	977190	0	0	691900	0	1268400	1813500	0	1626300	0	0	0	0	0	0	0	0	0	0	0	0	0	0
P18572	Basigin	Bsg	sp|P18572|BASI_MOUSE Basigin OS=Mus musculus OX=10090 GN=Bsg PE=1 SV=2	Mus musculus	GGKVLQEDTLPDLHTKYIVDADDR;SGEYSCIFLPEPVGR;VLQEDTLPDLHTKYIVDADDR	10090	3	3	3	10	42.444	107180000	3806100	4393000	4674800	4502400	6514200	20179000	8514300	13312000	5648200	7541500	20797000	7296400	4448900	2707700	4889300	4332700	4147300	3336300	6841800	3892500	3206200	2897000	5118600	4449400
Q6UWD8	Transmembrane protein C16orf54	C16orf54	sp|Q6UWD8|CP054_HUMAN Transmembrane protein C16orf54 OS=Homo sapiens OX=9606 GN=C16orf54 PE=1 SV=1	Homo sapiens	MPLTPEPPSGR	9606	1	1	1	4.9	24.359	6612700	1164000	0	1320700	590550	0	0	0	0	0	0	1883300	1654100	0	0	0	0	0	0	0	0	0	0	0	0
P13634	Carbonic anhydrase 1	Ca1	sp|P13634|CAH1_MOUSE Carbonic anhydrase 1 OS=Mus musculus OX=10090 GN=Ca1 PE=1 SV=4	Mus musculus	LYPIANGNNQSPIDIK	10090	1	1	1	6.1	28.33	1972300	903930	0	0	0	454010	0	0	0	0	0	614370	0	770690	0	0	0	301500	0	0	0	0	0	466580	0
P00920	Carbonic anhydrase 2	Ca2	sp|P00920|CAH2_MOUSE Carbonic anhydrase 2 OS=Mus musculus OX=10090 GN=Ca2 PE=1 SV=4	Mus musculus	QSPVDIDTATAQHDPALQPLLISYDK;SHHWGYSK;SIVNNGHSFNVEFDDSQDNAVLK	10090	3	3	3	21.9	29.032	77447000	4554100	8674200	6512800	2191900	13263000	4131300	3626700	4340500	9663000	5279100	10675000	4534900	2448300	2808600	4708500	1138000	7752500	2155500	2809400	3549400	3627100	6002300	2949500	2203700
P16015	Carbonic anhydrase 3	Ca3	sp|P16015|CAH3_MOUSE Carbonic anhydrase 3 OS=Mus musculus OX=10090 GN=Ca3 PE=1 SV=3	Mus musculus	DIKHDPSLQPWSASYDPGSAK;SLFSSAENEPPVPLVGNWRPPQPVK;SLFSSAENEPPVPLVGNWRPPQPVKGR	10090	3	3	3	18.5	29.366	51003000	0	2739600	400600	816180	0	0	0	9804900	0	7802100	24103000	5336100	0	4438400	2081100	2824700	0	0	0	4203400	0	2641400	6574000	2482400
O08532	Voltage-dependent calcium channel subunit alpha-2/delta-1	Cacna2d1	sp|O08532|CA2D1_MOUSE Voltage-dependent calcium channel subunit alpha-2/delta-1 OS=Mus musculus OX=10090 GN=Cacna2d1 PE=1 SV=1	Mus musculus	EAGENWQENPETYEDSFYKR;NRDEDPTLLWQVFGSATGLAR;YSETLKPDNFEESGYTFIAPR	10090	3	3	1	5.6	124.63	24821000	2453100	723520	1285500	0	723120	1183700	4475000	2945600	789500	2140100	3221900	4879700	3121800	784850	2231100	0	686800	697890	1482300	1070000	761180	1878200	1136100	924470
Q8N126	Cell adhesion molecule 3	CADM3	sp|Q8N126|CADM3_HUMAN Cell adhesion molecule 3 OS=Homo sapiens OX=9606 GN=CADM3 PE=1 SV=1	Homo sapiens	SLVTVLGIPQKPIITGYK	9606	1	1	0	4.5	43.299	15228000	0	0	280260	471120	0	0	0	792670	5576800	0	2584000	5523000	0	0	217880	298280	0	0	0	315560	3710900	0	1467400	3034300
Q8NFZ8	Cell adhesion molecule 4	CADM4	sp|Q8NFZ8|CADM4_HUMAN Cell adhesion molecule 4 OS=Homo sapiens OX=9606 GN=CADM4 PE=1 SV=1	Homo sapiens	EQAVEGGEVELSCLVPR;QTQYVLDVQYSPTAR	9606	2	2	0	8.2	42.785	21567000	5375900	481190	673500	768610	978160	1900000	1132100	5689300	2485800	1744500	0	338050	3913200	432000	783370	803360	725480	1281800	911350	2490500	1149800	736540	0	563060
Q05682	Caldesmon	CALD1	sp|Q05682|CALD1_HUMAN Caldesmon OS=Homo sapiens OX=9606 GN=CALD1 PE=1 SV=3	Homo sapiens	RKVLEEEEQR;RLQEALER	9606	2	2	2	2.3	93.23	119480000	9756200	1040300	13133000	11886000	0	20133000	15460000	20954000	4042000	10571000	10690000	1814300	4004500	951310	14097000	10211000	0	8465100	7734200	13237000	3685100	2589600	3252600	1365700
P0DP25	Calmodulin-3	CALM3	sp|P0DP25|CALM3_HUMAN Calmodulin-3 OS=Homo sapiens OX=9606 GN=CALM3 PE=1 SV=1;sp|P0DP24|CALM2_HUMAN Calmodulin-2 OS=Homo sapiens OX=9606 GN=CALM2 PE=1 SV=1;sp|P0DP23|CALM1_HUMAN Calmodulin-1 OS=Homo sapiens OX=9606 GN=CALM1 PE=1 SV=1	Homo sapiens	ADQLTEEQIAEFK;DGNGYISAAELR;DTDSEEEIR;EADIDGDGQVNYEEFVQMMTAK;EAFRVFDKDGNGYISAAELR;EAFSLFDKDGDGTITTK	9606	6	6	0	54.4	16.837	426880000	39932000	131520000	18789000	13835000	12897000	13896000	10238000	33834000	31089000	2149600	68919000	49788000	35092000	24160000	21722000	11115000	17839000	6943100	8929500	17831000	16562000	2191100	28915000	26627000
P14211	Calreticulin	Calr	sp|P14211|CALR_MOUSE Calreticulin OS=Mus musculus OX=10090 GN=Calr PE=1 SV=1	Mus musculus	DKGLQTSQDAR;EEDEEESPGQAKDEL;EQFLDGDAWTNR;IDNSQVESGSLEDDWDFLPPKK	10090	4	4	2	14.4	47.994	84031000	4972700	3619800	4819400	2658600	6720300	11762000	3932100	4066100	13665000	14931000	7507100	5376100	4371500	2250500	3799900	2209200	3304000	4635700	2044800	1847600	5802800	6433700	1894000	1597100
O35887	Calumenin	Calu	sp|O35887|CALU_MOUSE Calumenin OS=Mus musculus OX=10090 GN=Calu PE=1 SV=1	Mus musculus	DWILPSDYDHAEAEAR;EEIVDKYDLFVGSQATDFGEALVR;EEIVDKYDLFVGSQATDFGEALVRHDEF;EETKDWILPSDYDHAEAEAR;HLVYESDQNK;SFDQLTPEESK;SFDQLTPEESKER	10090	7	7	2	22.5	37.063	149650000	5923700	15572000	4920100	13382000	15404000	10152000	3978700	8644400	14488000	12675000	27467000	17046000	2500100	6787700	2434900	4045700	4380100	1790500	2557200	2155000	8829600	7261100	12535000	3719800
P51437	Cathelin-related antimicrobial peptide	Camp	sp|P51437|CAMP_MOUSE Cathelicidin antimicrobial peptide OS=Mus musculus OX=10090 GN=Camp PE=1 SV=2	Mus musculus	AVDDFNQQSLDTNLYR;LLDLDPEPQGDEDPDTPKSVR	10090	2	2	2	21.5	19.453	40725000	0	3306600	2229200	0	0	7018400	2051100	10439000	3475600	6942500	3602900	1660400	0	2229300	1813500	0	0	2752000	1581100	3384400	1334300	3546500	1175100	1041300
Q6ZQ38	Cullin-associated NEDD8-dissociated protein 1	Cand1	sp|Q6ZQ38|CAND1_MOUSE Cullin-associated NEDD8-dissociated protein 1 OS=Mus musculus OX=10090 GN=Cand1 PE=1 SV=2	Mus musculus	ASASYHISNLLEK	10090	1	1	0	1.1	136.33	7675700	0	1551000	715440	0	0	1418800	655230	0	995320	441090	1066900	831870	0	1112400	771440	0	0	824670	424950	0	634460	367120	580420	437820
O75155	Cullin-associated NEDD8-dissociated protein 2	CAND2	sp|O75155|CAND2_HUMAN Cullin-associated NEDD8-dissociated protein 2 OS=Homo sapiens OX=9606 GN=CAND2 PE=1 SV=3	Homo sapiens	MSTAAFHISSLLEKMTSSDK	9606	1	1	1	1.6	135.25	133870000	0	19636000	15468000	0	0	19346000	0	0	0	9951300	32246000	37227000	0	13739000	14951000	0	0	12276000	0	0	0	10764000	19081000	16205000
P35564	Calnexin	Canx	sp|P35564|CALX_MOUSE Calnexin OS=Mus musculus OX=10090 GN=Canx PE=1 SV=1	Mus musculus	DEEEEEEKLEEK;EIEDPEDRKPEDWDERPK;VTYKAPVPTGEVYFADSFDRGSLSGWILSK;VVDDWANDGWGLK;VVDDWANDGWGLKK	10090	5	5	4	12.5	67.277	197850000	19961000	23440000	4201400	3194000	19082000	17623000	38580000	28026000	7654400	9368500	17936000	8780800	9576100	15826000	4100600	7913900	5178200	9888500	15232000	4354300	9071900	7051600	6217500	6196300
P40124	Adenylyl cyclase-associated protein 1	Cap1	sp|P40124|CAP1_MOUSE Adenylyl cyclase-associated protein 1 OS=Mus musculus OX=10090 GN=Cap1 PE=1 SV=4	Mus musculus	ELSGLPSGPSVGSGPPPPPPGPPPPPISTSSGSDDSASR;NSLDCEIVSAK	10090	2	2	1	10.5	51.564	93737000	27228000	4220200	4399200	7243500	2609700	10362000	3546200	13379000	1197600	1461300	8629800	9460600	15966000	2211000	2301400	11641000	3784700	4644400	7692700	2851200	2022700	2961500	3436900	3648800
P24452	Macrophage-capping protein	Capg	sp|P24452|CAPG_MOUSE Macrophage-capping protein OS=Mus musculus OX=10090 GN=Capg PE=1 SV=2	Mus musculus	QAALQVADGFISR;YSPNTQVEILPQGR	10090	2	2	2	7.7	39.24	105750000	7109900	16510000	5603200	6535400	4605800	10707000	7721400	6316600	7579300	12945000	9013900	11105000	5375300	9332600	3869200	5491300	2007500	5363000	3493400	2719600	2024700	8706800	3063100	4393400
P47754	F-actin-capping protein subunit alpha-2	Capza2	sp|P47754|CAZA2_MOUSE F-actin-capping protein subunit alpha-2 OS=Mus musculus OX=10090 GN=Capza2 PE=1 SV=3	Mus musculus	ADLEEQLSDEEK;ADLEEQLSDEEKVR;LLLNNDNLLR	10090	3	3	0	8.4	32.967	74208000	5164600	8687200	2617000	1503800	8827000	8493000	6743700	5464200	10087000	3169400	8987100	4463000	2067600	3011000	2194200	963060	3085900	2337900	2608800	2481500	2709700	2202800	2566900	2230100
O09165	Calsequestrin-1	Casq1	sp|O09165|CASQ1_MOUSE Calsequestrin-1 OS=Mus musculus OX=10090 GN=Casq1 PE=1 SV=3	Mus musculus	AYEDAAEEFHPYIPFFATFDSK;ELQAFENIEDEIK	10090	2	2	1	8.6	46.377	79545000	4895000	11847000	3630200	2130700	6485100	4083800	8383500	11602000	3578000	9894400	6015800	6999500	5216800	5708800	2870400	1409000	3241300	2507500	4008900	5186100	1474500	5178600	2192300	2561200
P24270	Catalase	Cat	sp|P24270|CATA_MOUSE Catalase OS=Mus musculus OX=10090 GN=Cat PE=1 SV=4	Mus musculus	FNSANEDNVTQVR;LGPNYLQIPVNCPYR	10090	2	2	2	5.3	59.795	19571000	699460	763440	3843000	0	2248800	5430400	2180000	0	1115800	2145100	0	1145300	641510	349300	3577800	0	1731000	2022300	1374500	0	646600	1265600	0	548010
P49817	Caveolin-1	Cav1	sp|P49817|CAV1_MOUSE Caveolin-1 OS=Mus musculus OX=10090 GN=Cav1 PE=1 SV=1	Mus musculus	HLNDDVVK;SGGKYVDSEGHLYTVPIR	10090	2	2	0	14.6	20.538	20088000	4148200	2671100	1118700	2150000	0	0	0	0	843990	0	5062400	4094000	3312200	2636200	1151200	1287800	0	0	0	0	740310	0	1480700	2056300
P48758	Carbonyl reductase [NADPH] 1	Cbr1	sp|P48758|CBR1_MOUSE Carbonyl reductase [NADPH] 1 OS=Mus musculus OX=10090 GN=Cbr1 PE=1 SV=3	Mus musculus	SSSRPVALVTGANK;SSSRPVALVTGANKGIGFAITR	10090	2	2	2	7.9	30.641	13554000	0	181700	0	0	957390	1308800	1415800	1690400	2378500	612060	3356500	1653200	0	373900	0	0	832310	656620	528360	1064300	705010	458910	1599800	884150
P08074	Carbonyl reductase [NADPH] 2	Cbr2	sp|P08074|CBR2_MOUSE Carbonyl reductase [NADPH] 2 OS=Mus musculus OX=10090 GN=Cbr2 PE=1 SV=1	Mus musculus	ECPGIEPVCVDLGDWDATEK;TNSDLVSLAK	10090	2	2	2	12.3	25.958	31113000	1360900	0	359250	1037000	0	4861300	1800400	333270	687700	18581000	1070600	1021900	537720	0	814910	1854800	0	6202300	2740900	456990	906050	6101800	1278400	1180600
P80314	T-complex protein 1 subunit beta	Cct2	sp|P80314|TCPB_MOUSE T-complex protein 1 subunit beta OS=Mus musculus OX=10090 GN=Cct2 PE=1 SV=4	Mus musculus	LGGSLADSYLDEGFLLDKK;LSSFIGAIAIGDLVK	10090	2	2	1	6.4	57.477	16309000	1922600	769930	849040	600520	2960500	2762400	3833600	0	1250700	822690	537330	0	1723700	671830	862310	702030	1761800	1191700	2183700	0	750950	815140	951100	0
P42932	T-complex protein 1 subunit theta	Cct8	sp|P42932|TCPQ_MOUSE T-complex protein 1 subunit theta OS=Mus musculus OX=10090 GN=Cct8 PE=1 SV=3	Mus musculus	AIAGTGANVIVTGGK	10090	1	1	1	2.7	59.555	31306000	2235300	5646700	931550	1205500	3411600	3978000	2367200	1469900	2769900	4064600	3225200	0	2340700	3631400	895210	1436000	2376500	2385100	1463200	1193200	1573600	3276200	1939100	0
Q64314	Hematopoietic progenitor cell antigen CD34	Cd34	sp|Q64314|CD34_MOUSE Hematopoietic progenitor cell antigen CD34 OS=Mus musculus OX=10090 GN=Cd34 PE=1 SV=1	Mus musculus	EKGEDLIQILCEK;GEDLIQILCEK;LAQGICLELSEASSCEEFKK	10090	3	3	3	8.6	40.982	49701000	1373300	0	1298600	3019500	0	6187500	1515300	1054300	7027500	0	18818000	9407100	2577100	0	1515900	1342300	0	1587200	1904900	1225100	3592200	0	2933600	3178400
P15379	CD44 antigen	Cd44	sp|P15379|CD44_MOUSE CD44 antigen OS=Mus musculus OX=10090 GN=Cd44 PE=1 SV=3	Mus musculus	YGFIEGNVVIPR	10090	1	1	1	1.5	85.616	30518000	1265700	3769700	862120	1379100	2131100	3775300	5755400	1944000	3096600	0	2774300	3764300	1203000	2815300	875800	1266900	1619700	2067400	3958800	1144100	2137800	0	1421900	1866500
P35762	CD81 antigen	Cd81	sp|P35762|CD81_MOUSE CD81 antigen OS=Mus musculus OX=10090 GN=Cd81 PE=1 SV=2	Mus musculus	TFHETLNCCGSNALTTLTTTILR	10090	1	1	1	9.7	25.814	87305000	7877100	4117200	3655000	1676300	11334000	4407100	18230000	6576000	3600800	10245000	6925600	8660400	7787700	2919900	4116600	1616300	6433200	2532900	12502000	4062200	2269700	8799500	3725500	4507200
P40237	CD82 antigen	Cd82	sp|P40237|CD82_MOUSE CD82 antigen OS=Mus musculus OX=10090 GN=Cd82 PE=1 SV=1	Mus musculus	EEAWDYVQAQVK;IKEEDNQLIVK	10090	2	2	2	8.6	29.628	43023000	1345100	0	4918700	1480900	2857800	7112700	5397800	2270600	3353100	4840100	4888200	4558100	1470100	0	3769600	1267700	510540	2752600	2358200	1536600	2315500	3153100	1897000	1614800
P60766	Cell division control protein 42 homolog	Cdc42	sp|P60766|CDC42_MOUSE Cell division control protein 42 homolog OS=Mus musculus OX=10090 GN=Cdc42 PE=1 SV=2	Mus musculus	NKQKPITPETAEK;TPFLLVGTQIDLRDDPSTIEK;YVECSALTQK	10090	3	3	0	23	21.258	27417000	329940	0	3081600	0	726170	9154300	958990	2167800	5812200	2353900	1470400	1361900	564050	0	1362700	0	729730	2774600	894840	931140	2707400	1404700	1130700	853770
Q9Y5S2	Serine/threonine-protein kinase MRCK beta	CDC42BPB	sp|Q9Y5S2|MRCKB_HUMAN Serine/threonine-protein kinase MRCK beta OS=Homo sapiens OX=9606 GN=CDC42BPB PE=1 SV=2	Homo sapiens	KESVAHWEAQIAEIIQWVSDEK;QLEDTVALR	9606	2	2	1	1.8	194.31	6133600	0	0	0	0	1277800	0	788480	0	4067300	0	0	0	0	0	0	0	854320	0	0	0	2570000	0	0	0
P55290	Cadherin-13	CDH13	sp|P55290|CAD13_HUMAN Cadherin-13 OS=Homo sapiens OX=9606 GN=CDH13 PE=1 SV=1	Homo sapiens	INENTGSVSVTR;MTAFDADDPATDNALLR;SIVVSPILIPENQR;SIVVSPILIPENQRQPFPR;TLEGPVPLEVIVIDQNDNRPIFR	9606	5	5	0	10	78.286	146730000	5828400	8974800	4340800	23814000	21592000	4069200	7434500	11741000	7803200	7359200	31775000	12001000	5214100	3252200	3686400	10400000	8311100	2667300	5152000	8459600	3764700	4901800	8655800	3134600
Q99L43	Phosphatidate cytidylyltransferase 2	Cds2	sp|Q99L43|CDS2_MOUSE Phosphatidate cytidylyltransferase 2 OS=Mus musculus OX=10090 GN=Cds2 PE=1 SV=1	Mus musculus	AETAPLPTSVDDTPEVLNR	10090	1	1	1	4.3	51.313	36836000	3250700	3593700	1631900	796060	0	11949000	2550200	6838700	1538900	1337500	2111800	1237800	3250700	2554900	1744300	769420	0	6884200	1753200	4234800	972360	1151600	1138800	645750
Q3UKK2	Carcinoembryonic antigen-related cell adhesion molecule 5	Ceacam5	sp|Q3UKK2|CEAM5_MOUSE Carcinoembryonic antigen-related cell adhesion molecule 5 OS=Mus musculus OX=10090 GN=Ceacam5 PE=2 SV=1	Mus musculus	NLQSLFWYKGMIAEK	10090	1	1	1	1.6	106.27	2981600	2440200	0	0	0	0	0	0	0	0	0	0	541450	0	0	0	0	0	0	0	0	0	0	0	0
O15078	Centrosomal protein of 290 kDa	CEP290	sp|O15078|CE290_HUMAN Centrosomal protein of 290 kDa OS=Homo sapiens OX=9606 GN=CEP290 PE=1 SV=2	Homo sapiens	NLDLENDILYMR	9606	1	1	0	0.5	290.38	20406000	20406000	0	0	0	0	0	0	0	0	0	0	0	0	0	0	0	0	0	0	0	0	0	0	0
Q8VCT4	Carboxylesterase 1D	Ces1d	sp|Q8VCT4|EST1D_MOUSE Carboxylesterase 1D OS=Mus musculus OX=10090 GN=Ces1d PE=1 SV=1	Mus musculus	AVIGDHGDEIFSVFGSPFLK	10090	1	1	1	3.5	61.787	3261600	0	0	0	0	656400	0	695070	0	0	463500	0	1446600	0	0	0	0	437760	0	463310	0	0	404490	0	764930
P18760	Cofilin-1	Cfl1	sp|P18760|COF1_MOUSE Cofilin-1 OS=Mus musculus OX=10090 GN=Cfl1 PE=1 SV=3	Mus musculus	ASGVAVSDGVIKVFNDMKVR;EILVGDVGQTVDDPYTTFVK;LGGSAVISLEGKPL;YALYDATYETK	10090	4	4	1	39.2	18.559	61292000	1579500	6581900	2037100	2933400	4536600	9371700	6418600	3696700	7497200	1221200	6836700	8581700	1840100	1427800	1424000	2696800	1406000	3197000	1915800	2666900	2899700	1322400	1808100	2297100
P45591	Cofilin-2	Cfl2	sp|P45591|COF2_MOUSE Cofilin-2 OS=Mus musculus OX=10090 GN=Cfl2 PE=1 SV=1	Mus musculus	QILVGDIGDTVEDPYTSFVK;YALYDATYETK	10090	2	1	0	18.7	18.709	6835800	164960	1376500	0	0	930940	0	0	2990500	0	0	0	1372900	193630	736050	0	0	664150	0	0	1976000	0	0	0	764270
Q61362	Chitinase-3-like protein 1	Chi3l1	sp|Q61362|CH3L1_MOUSE Chitinase-3-like protein 1 OS=Mus musculus OX=10090 GN=Chi3l1 PE=1 SV=3	Mus musculus	HTSTEARMGMR	10090	1	1	1	2.8	43.893	495280	0	495280	0	0	0	0	0	0	0	0	0	0	0	0	0	0	0	0	0	0	0	0	0	0
O35744	Chitinase-like protein 3	Chil3	sp|O35744|CHIL3_MOUSE Chitinase-like protein 3 OS=Mus musculus OX=10090 GN=Chil3 PE=1 SV=2	Mus musculus	LLLTSTGAGIIDVIK	10090	1	1	1	3.8	44.458	11948000	228620	0	461180	0	328280	0	1163200	3506900	1200800	1647000	2777300	634430	253660	0	469020	0	241320	0	690700	2387600	834230	1559200	1141000	341050
Q91Z98	Chitinase-like protein 4	Chil4	sp|Q91Z98|CHIL4_MOUSE Chitinase-like protein 4 OS=Mus musculus OX=10090 GN=Chil4 PE=1 SV=2	Mus musculus	LLLTSTGAGFIDVIK	10090	1	1	1	3.7	44.974	1595500	0	0	0	0	0	0	1595500	0	0	0	0	0	0	0	0	0	0	0	0	0	0	0	0	0
Q8BMK4	Cytoskeleton-associated protein 4	Ckap4	sp|Q8BMK4|CKAP4_MOUSE Cytoskeleton-associated protein 4 OS=Mus musculus OX=10090 GN=Ckap4 PE=1 SV=2	Mus musculus	ELVSLKQEQQAFKQAADSER;ERDFTSLENTVEERLTELTK;HTESLESLLSK;HTESLESLLSKSQEYEQR;SINDNIAIFTDVQKR;SLGETQLALSSDLKELK	10090	6	6	5	15.7	63.691	28812000	0	1098100	1296900	1742600	636870	11630000	5579000	0	1630300	292080	1794400	3112200	0	1326500	1097400	1447300	696710	1870000	1558300	0	488140	535430	548860	1358600
Q04447	Creatine kinase B-type	Ckb	sp|Q04447|KCRB_MOUSE Creatine kinase B-type OS=Mus musculus OX=10090 GN=Ckb PE=1 SV=1	Mus musculus	AGVHIKLPHLGKHEK;AIEKLAVEALSSLDGDLSGR;AIEKLAVEALSSLDGDLSGRYYALK;DLFDPIIEER;FCTGLTQIETLFK;GTGGVDTAAVGGVFDVSNADR;HGGYQPSDEHKTDLNPDNLQGGDDLDPNYVLSSR;LAVEALSSLDGDLSGR;LAVEALSSLDGDLSGRYYALK;LEQGQAIDDLMPAQK;TDLNPDNLQGGDDLDPNYVLSSR;VLTPELYAELR	10090	12	12	7	37.8	42.713	1020600000	78722000	64214000	60441000	59985000	70874000	101680000	132550000	142120000	77956000	47768000	112260000	72055000	24085000	19335000	28849000	18928000	22901000	19749000	28977000	33121000	22583000	14913000	32299000	24963000
P07310	Creatine kinase M-type	Ckm	sp|P07310|KCRM_MOUSE Creatine kinase M-type OS=Mus musculus OX=10090 GN=Ckm PE=1 SV=1	Mus musculus	GGDDLDPNYVLSSR;GTGGVDTAAVGAVFDISNADR;LGSSEVEQVQLVVDGVK;VLTPDLYNKLR	10090	4	4	2	16.5	43.044	87502000	6406100	11665000	1575300	2164700	6566200	13624000	3877000	5346000	1723400	17539000	10103000	6912700	2440800	5255800	985210	1008100	1843400	2393100	1151100	2553800	1232200	4547300	3977000	2189000
Q6P8J7	Creatine kinase S-type, mitochondrial	Ckmt2	sp|Q6P8J7|KCRS_MOUSE Creatine kinase S-type, mitochondrial OS=Mus musculus OX=10090 GN=Ckmt2 PE=1 SV=1	Mus musculus	EVENVAITALEGLKGDLAGR;EVENVAITALEGLKGDLAGRYYK;GQDIKVPPPLPQFGRK;GTGGVDTAAVADVYDISNIDR;GTGGVDTAAVADVYDISNIDRIGR;ITHGQFDER;LGYILTCPSNLGTGLR;REVENVAITALEGLKGDLAGR;RGTGGVDTAAVADVYDISNIDR	10090	9	9	2	21.5	47.473	780670000	37745000	84984000	23303000	25214000	117060000	43386000	95877000	103630000	44015000	54894000	76913000	73656000	10163000	20821000	7740100	8847500	21138000	9557900	17650000	16271000	8070800	16006000	13765000	13899000
Q80U30	Protein CLEC16A	Clec16a	sp|Q80U30|CL16A_MOUSE Protein CLEC16A OS=Mus musculus OX=10090 GN=Clec16a PE=1 SV=2	Mus musculus	MFGRSRSWVGGGHSK	10090	1	1	1	1.4	116.23	37620000	2453400	3187000	1834100	1359300	2746500	3979500	1158700	2435500	5974400	6553500	3059900	2878500	2556600	2398900	2136600	1551200	2027700	2209300	1039500	1453200	3609000	4977700	1590000	1447100
Q9Z1Q5	Chloride intracellular channel protein 1	Clic1	sp|Q9Z1Q5|CLIC1_MOUSE Chloride intracellular channel protein 1 OS=Mus musculus OX=10090 GN=Clic1 PE=1 SV=3	Mus musculus	LAALNPESNTSGLDIFAK	10090	1	1	1	7.5	27.013	11355000	413000	1098500	1931400	641540	0	0	1954800	1457400	0	616060	1605600	1637000	455320	807140	1808500	640830	0	0	1388900	932710	0	564260	894810	882630
Q00610	Clathrin heavy chain 1	CLTC	sp|Q00610|CLH1_HUMAN Clathrin heavy chain 1 OS=Homo sapiens OX=9606 GN=CLTC PE=1 SV=5	Homo sapiens	CNEPAVWSQLAK;GQCDLELINVCNENSLFK;GQCDLELINVCNENSLFKSLSR;IHEGCEEPATHNALAK;IYIDSNNNPER;KFNALFAQGNYSEAAK;LASTLVHLGEYQAAVDGAR;LECSEELGDLVK;LKLLLPWLEAR;LLYNNVSNFGR;NNLAGAEELFAR;SVNESLNNLFITEEDYQALR;TSIDAYDNFDNISLAQR	9606	13	13	0	10.7	191.61	312850000	11134000	16619000	28075000	28815000	14820000	29413000	35757000	23012000	38164000	19527000	30325000	37192000	4334600	4181000	7034100	7228700	3936400	5803900	6107600	5487000	6006600	5821300	6815700	6778900
Q06890	Clusterin	Clu	sp|Q06890|CLUS_MOUSE Clusterin OS=Mus musculus OX=10090 GN=Clu PE=1 SV=1	Mus musculus	ASGIIDTLFQDR;EGEDDRTVCKEIR	10090	2	2	2	5.6	51.655	17371000	532760	1789900	2134000	1384200	2654000	2425900	0	1177200	2588800	0	2684100	0	0	797130	1066400	1177000	1777200	0	0	0	1085700	0	1003200	0
Q08091	Calponin-1	Cnn1	sp|Q08091|CNN1_MOUSE Calponin-1 OS=Mus musculus OX=10090 GN=Cnn1 PE=1 SV=1	Mus musculus	EQELREWIEGVTGRR;EWIEGVTGRR;GPAYGLSAEVK;KVNESTQNWHQLENIGNFIK;SSAHFNRGPAYGLSAEVK;VNESTQNWHQLENIGNFIK;VNESTQNWHQLENIGNFIKAITK	10090	7	7	3	19.2	33.355	499880000	34598000	31727000	25492000	20632000	37441000	83952000	18833000	37532000	67994000	66536000	45024000	30116000	19472000	8927800	6128300	6532300	9377200	21134000	11495000	9484200	15246000	22261000	10528000	9199800
Q08093	Calponin-2	Cnn2	sp|Q08093|CNN2_MOUSE Calponin-2 OS=Mus musculus OX=10090 GN=Cnn2 PE=1 SV=1	Mus musculus	SWIEGLTGLSIGPDFQK	10090	1	1	1	5.6	33.155	9534900	670600	1385500	0	747690	1194000	588440	442000	1357500	880790	0	0	2268400	648800	902040	0	735600	812590	345090	329180	855660	566500	0	0	1204600
Q15417	Calponin-3	CNN3	sp|Q15417|CNN3_HUMAN Calponin-3 OS=Homo sapiens OX=9606 GN=CNN3 PE=1 SV=1	Homo sapiens	THFNKGPSYGLSAEVK;VNESSLNWPQLENIGNFIK	9606	2	2	0	10.6	36.413	8448100	0	579570	568420	532960	0	951510	664930	781420	1004300	0	1598300	1766600	0	419970	561950	496530	0	0	0	497630	652640	0	886390	0
Q9QXT0	Protein canopy homolog 2	Cnpy2	sp|Q9QXT0|CNPY2_MOUSE Protein canopy homolog 2 OS=Mus musculus OX=10090 GN=Cnpy2 PE=1 SV=1	Mus musculus	ALVDELEWEIAR;INPDGSQSVVEVPYAR	10090	2	2	1	15.4	20.767	20225000	491750	509260	1152900	1202200	2175400	2668000	1866700	791580	2342500	0	4566100	2458600	495650	547930	686360	788260	734190	924630	766520	741840	865390	0	1667300	773740
Q60847	Collagen alpha-1(XII) chain	Col12a1	sp|Q60847|COCA1_MOUSE Collagen alpha-1(XII) chain OS=Mus musculus OX=10090 GN=Col12a1 PE=2 SV=3	Mus musculus	AINTFPYRGGSTNTGK;ALALGALQNIR;DLKPETDYVVNVYSVVEDEYSEPLKGTEK;DYRPQVGVIADPSSK;EVTLPLPRPQDVK;GEVQTVTFDTDEVK;GPGDLEAPTNLVISER;HHALSVGPQTTTLNVR;HVFIVDDFESFEK;IIYSPTVGDPIDEYTTVPGRR;ITYQPSTGEGNEQTITVGGR;IVDDLTINLCNSVK;IVYSPVAGTRPSESIVVPGNTR;LFYAPTSGGPEELVPIPGNTNYAILR;LGELVLGPYDNTVVLEELR;LIPDTPYSVNIVALYSDGEGNPSPSQGR;LKDEGVELFAIGIK;LKLSPADGTR;LKPDTPYTITVYSQYPDGEGGR;LSWDPSPSAVTGYK;NAFINQPTAELHPNGLPPSYTIILLF…	10090	41	41	28	20.5	340.21	1012600000	16080000	147340000	43338000	38011000	107990000	104230000	75039000	88096000	99431000	84300000	115370000	93360000	6056000	16096000	10899000	8757500	12123000	10451000	9504300	11598000	9093500	12981000	13109000	9782200
Q80X19	Collagen alpha-1(XIV) chain	Col14a1	sp|Q80X19|COEA1_MOUSE Collagen alpha-1(XIV) chain OS=Mus musculus OX=10090 GN=Col14a1 PE=1 SV=2	Mus musculus	ALLPDTEYKVTVTPVYTVGEGVSVSAPGKTLPSSGPQNLR;ASALATIGPPTELITSEVTAR;CCELPGLRDEESCPDLPR;DEESCPDLPR;DEVIDAVR;DTLFTSDSGTR;DTLFTSDSGTRR;ESGVELFAIGVK;ETLLDAIRHISYKGGNTK;HCFYGLQPDSEYKISVYTK;HVFFVDDFDAFKK;IEWHLNAFNTK;IEWHLNAFNTKDEVIDAVR;IGILITDGKSQDDIIPPSR;IGLAQYSGDPR;IGLAQYSGDPRIEWHLNAFNTKDEVIDAVR;IINFLYSTVGALDK;IVLESLQDTQAQESTVGGGVNR;IVYTSADGTEINEVEVDPITTFPLK;LQELEGPSVSIMQK;NFLENLVTAFNVGSEKTR;NLRESGVELFAIG…	10090	30	30	22	22	193.01	1833900000	32273000	242770000	181660000	51069000	88410000	212660000	167260000	145830000	178190000	138360000	184710000	210750000	13826000	40185000	26713000	16824000	22300000	30594000	29299000	26607000	29610000	35274000	31012000	29387000
O35206	Collagen alpha-1(XV) chain	Col15a1	sp|O35206|COFA1_MOUSE Collagen alpha-1(XV) chain OS=Mus musculus OX=10090 GN=Col15a1 PE=1 SV=2	Mus musculus	ADFQCFQQAR;FTGSIQQLTIYSDPR	10090	2	2	2	1.8	140.47	47884000	1971900	6673700	1709300	1371800	4108300	4104000	4266600	5940900	4206700	7678400	2663300	3189000	997680	2038400	4262000	2041900	1208600	1327900	1568900	2275700	2235900	3940300	2207300	2763000
P39061	Collagen alpha-1(XVIII) chain	Col18a1	sp|P39061|COIA1_MOUSE Collagen alpha-1(XVIII) chain OS=Mus musculus OX=10090 GN=Col18a1 PE=1 SV=4	Mus musculus	DEVLSPSWDSLFSGSQGQLQPGAR;GADFQCFQQAR;GAGLFVGQAGTADPDKFQGMISELKVR;GSVPIVNLKDEVLSPSWDSLFSGSQGQLQPGAR;TETTGATGQASSLLSGR;VSPVHCLDEEDDDEDR	10090	6	6	5	5.9	182.17	246620000	39792000	13239000	15940000	18486000	15745000	9575100	43766000	9523800	20927000	8911700	31024000	19695000	30769000	3964500	6683500	5947400	6395300	2940300	6264300	2307200	6682000	3806200	8409900	5314800
P11087	Collagen alpha-1(I) chain	Col1a1	sp|P11087|CO1A1_MOUSE Collagen alpha-1(I) chain OS=Mus musculus OX=10090 GN=Col1a1 PE=1 SV=4	Mus musculus	GETGPAGPAGPIGPAGAR;GPAGPQGPR;NGDRGETGPAGPAGPIGPAGAR;NGDRGETGPAGPAGPIGPAGARGPAGPQGPR	10090	4	4	3	2.1	138.03	4146200000	25817000	361720000	331370000	932650000	290920000	350720000	152020000	345330000	802120000	68875000	220810000	263820000	16167000	283040000	250380000	719790000	193560000	167930000	82371000	162540000	237380000	46250000	87501000	119170000
Q01149	Collagen alpha-2(I) chain	Col1a2	sp|Q01149|CO1A2_MOUSE Collagen alpha-2(I) chain OS=Mus musculus OX=10090 GN=Col1a2 PE=1 SV=2	Mus musculus	GETGLRGDTGNTGR;GPAGPSGPVGK;GPAGPSGPVGKDGR;GPRGDQGPVGR;GVVGPQGAR;HGNRGEPGPAGSVGPVGAVGPR;SGQPGPVGPAGVR	10090	7	7	5	6	129.56	1280200000	31722000	11400000	20986000	187350000	231760000	74992000	112920000	100330000	183660000	63091000	105260000	156760000	32980000	41197000	21675000	72479000	12797000	55083000	42998000	40806000	29590000	63650000	26783000	112580000
Q04857	Collagen alpha-1(VI) chain	Col6a1	sp|Q04857|CO6A1_MOUSE Collagen alpha-1(VI) chain OS=Mus musculus OX=10090 GN=Col6a1 PE=1 SV=1	Mus musculus	ADPSQDVRVAVVQYSGQGQQQPGR;ASVDAVKYFGK;DELKASVDAVKYFGK;DRLLPPTQNNR;FLSAGRADPSQDVRVAVVQYSGQGQQQPGR;FYREASSGATK;GVLYQTVSR;GVLYQTVSRK;HLFRVPNYQALLR;HLGIKVFSVAITPDHLEPR;LKPYGALVDKVK;LSIIATDHTYR;NAQDFKEAVK;NAQDFKEAVKK;NLVWNAGALHYSDEVEIIR;NNVEQVCCSFECQAAR;TAEYDVAFGER;VAVVQYSGQGQQQPGR;VFSVAITPDHLEPR;VLLFSDGNSQGATAEAIEK;VLLFSDGNSQGATAEAIEKAVQEAQR;VPNYQALLR;YLIVVTDGHPLEGYKEPCGGLEDAVNEAK	10090	23	23	19	23.8	108.49	1845900000	36216000	154580000	43799000	430860000	65418000	170950000	151250000	196970000	119430000	96128000	291550000	88711000	20005000	51765000	34094000	114410000	51466000	61737000	66005000	53356000	39221000	47947000	60766000	38967000
Q02788	Collagen alpha-2(VI) chain	Col6a2	sp|Q02788|CO6A2_MOUSE Collagen alpha-2(VI) chain OS=Mus musculus OX=10090 GN=Col6a2 PE=1 SV=3	Mus musculus	AREEGIRLFAVAPNR;ATYLNSFSHVGTGIVHAINNVVR;DFDSLAQPSFFDR;DFDSLAQPSFFDRFIR;DIANSPHELYR;EEGIRLFAVAPNR;EEGIRLFAVAPNRNLNEQGLR;EKDFDSLAQPSFFDR;EKDFDSLAQPSFFDRFIR;FVEDVSRR;GVVNFAVVITDGHVTGSPCGGIK;LFAVAPNRNLNEQGLR;LGEQNFHKVR;NLEWIAGGTWTPSALK;NLNEQGLRDIANSPHELYR;RDDDPLNAR;RFVEDVSR;VGVVQYSHEGTFEAIR;VGVVQYSHEGTFEAIRLDDER;YGGLHFSDQVEVFSPPGSDR;YGGLHFSDQVEVFSPPGSDRASFTK	10090	21	21	18	18.2	110.33	1639200000	47115000	149780000	54478000	182750000	87516000	253900000	251110000	149060000	116180000	98781000	168450000	80110000	16286000	36946000	17094000	40810000	16433000	43098000	32425000	32101000	14584000	23236000	26236000	17855000
P12111	Collagen alpha-3(VI) chain	COL6A3	sp|P12111|CO6A3_HUMAN Collagen alpha-3(VI) chain OS=Homo sapiens OX=9606 GN=COL6A3 PE=1 SV=5	Homo sapiens	DVVFLLDGSEGVR;EFRELPNIEER;GETGDDGRDGVGSEGR;GETGDDGRDGVGSEGRR;GGPGQPGFEGEQGTR;IEEGVPQFLVLISSGK;NIDSEEVGKIASNSATAFR;QIIDAINKVVYKGGR;VPQIAFVITGGK	9606	9	9	9	3.7	343.67	385790000	14935000	46230000	8911900	67823000	14987000	51211000	57490000	24701000	15750000	39622000	23399000	20724000	4410900	12454000	3680800	16943000	3486100	5265000	13208000	7182500	3113200	10139000	4423200	3783500
A6H584	Collagen alpha-5(VI) chain	Col6a5	sp|A6H584|CO6A5_MOUSE Collagen alpha-5(VI) chain OS=Mus musculus OX=10090 GN=Col6a5 PE=1 SV=4	Mus musculus	ALDFILPLIKK;ALREDGVKIISVGVQK;ALVSSVIDSFHITSNPSASESGDR;DTITSIVSDLNIR;GTAGQPIYSPCELIQFLR;IGNALQEAHR;IIKDVTQYR;KAQGVPQIAVLVTHR;VALAQYSDALHNEFQLGTFK;VAVVSYDSDTSYLIR;VNFGQNFDSLK	10090	11	11	8	6.1	289.57	561690000	14414000	32843000	32634000	40030000	78749000	55506000	66058000	87077000	20794000	22838000	70421000	40326000	4822300	17759000	12201000	18105000	11491000	11767000	13938000	31351000	6251900	8891800	13213000	13075000
Q8C6K9	Collagen alpha-6(VI) chain	Col6a6	sp|Q8C6K9|CO6A6_MOUSE Collagen alpha-6(VI) chain OS=Mus musculus OX=10090 GN=Col6a6 PE=1 SV=2	Mus musculus	ALREDGVKIISVGVQK;GKVVLLFSDGLDDGIEKLEQK;GLASFSTCDLIQYVR;IGNALQEAHR;INAGTPQVLLVLTDGR;INAGTPQVLLVLTDGRSQDEVAQAAEELR;IQDLSPQVGQAYTGAALR;IQDLSPQVGQAYTGAALRK;VALAQYSDALHNEFQLGTFK;VYYVHEFDALR	10090	10	7	7	6.2	246.32	122810000	1767600	13012000	6545400	7586900	15646000	20055000	12002000	5626600	8553300	10453000	15308000	6249400	1954800	4263100	4665300	3272700	4033500	5302100	8449700	3967700	3076300	2673200	3610200	3890900
Q9ULV4	Coronin-1C	CORO1C	sp|Q9ULV4|COR1C_HUMAN Coronin-1C OS=Homo sapiens OX=9606 GN=CORO1C PE=1 SV=1	Homo sapiens	AIFLADGNVFTTGFSR	9606	1	1	0	3.4	53.248	39563000	1178300	3801000	3320700	2577100	2379800	4319200	2671400	3318800	3110100	2521800	5641800	4723400	1178300	2702200	3549200	2490900	1591100	2488500	1836500	2055100	1965200	2171300	3042300	2464200
P19783	Cytochrome c oxidase subunit 4 isoform 1, mitochondrial	Cox4i1	sp|P19783|COX41_MOUSE Cytochrome c oxidase subunit 4 isoform 1, mitochondrial OS=Mus musculus OX=10090 GN=Cox4i1 PE=1 SV=2	Mus musculus	AHGSVVKSEDYAFPTYADRR;DYPLPDVAHVTMLSASQK;SEDYAFPTYADRR	10090	3	3	3	22.5	19.53	96394000	521200	7433000	628740	7324100	18606000	12674000	11614000	6652800	8291100	13699000	6619200	2330800	652790	4498800	806770	7696200	5647300	9910100	2804200	5779500	8146800	3698700	1324500	1322400
P12787	Cytochrome c oxidase subunit 5A, mitochondrial	Cox5a	sp|P12787|COX5A_MOUSE Cytochrome c oxidase subunit 5A, mitochondrial OS=Mus musculus OX=10090 GN=Cox5a PE=1 SV=2	Mus musculus	AGPHKEIYPYVIQELRPTLNELGISTPEELGLDKV;GMNTLVGYDLVPEPK;RLNDFASAVR;WVTYFNKPDIDAWELR;WVTYFNKPDIDAWELRK	10090	5	5	2	52.7	16.101	275580000	2723100	40418000	10262000	37627000	13686000	37859000	14635000	27366000	23091000	17309000	33502000	17102000	2266600	13943000	5810400	15614000	5199400	10263000	7839400	18618000	7774400	13556000	10184000	6173600
P56391	Cytochrome c oxidase subunit 6B1	Cox6b1	sp|P56391|CX6B1_MOUSE Cytochrome c oxidase subunit 6B1 OS=Mus musculus OX=10090 GN=Cox6b1 PE=1 SV=2	Mus musculus	AEDIKTK;SLCPVSWVSAWDDR	10090	2	2	2	24.4	10.071	51649000	5800000	1274200	3022300	7650600	1333100	6846700	1409700	2535200	1634800	5327700	6376400	8438300	1224100	2974300	2558700	3571500	2926300	3108000	3181800	1362100	3021200	2813000	2651900	4742400
Q9CPQ1	Cytochrome c oxidase subunit 6C	Cox6c	sp|Q9CPQ1|COX6C_MOUSE Cytochrome c oxidase subunit 6C OS=Mus musculus OX=10090 GN=Cox6c PE=1 SV=3	Mus musculus	SSGALLPKPQMR	10090	1	1	1	15.8	8.4689	10767000	0	961090	493000	1295000	1082200	2823400	689920	0	0	2364800	1057200	0	0	753390	620000	1186200	786480	1443900	477690	0	0	2050600	574180	0
Q61147	Ceruloplasmin	Cp	sp|Q61147|CERU_MOUSE Ceruloplasmin OS=Mus musculus OX=10090 GN=Cp PE=1 SV=2	Mus musculus	ADDKVLPGQQYVYVLHANEPSPGEGDSNCVTR;ALYFEYTDGTFSK;DIASGLIGPLILCK;DIASGLIGPLILCKK;ETFTYEWTVPK;QKDVDKEFYLFPTVFDENESLLLDDNIR;TESSTVVPTLPGEVR;TIDKPAWLGFLGPVIK	10090	8	8	8	12.3	121.15	205800000	16838000	13223000	11592000	12964000	9740200	13970000	14582000	25893000	11860000	15426000	43984000	15729000	8166200	4693900	4912600	5887300	3959700	5322400	6878200	4724200	4480600	4252700	6387400	3637100
Q8C166	Copine-1	Cpne1	sp|Q8C166|CPNE1_MOUSE Copine-1 OS=Mus musculus OX=10090 GN=Cpne1 PE=1 SV=1	Mus musculus	AQGWAPLKAPPTPGKGPAQAPQA;LYGPTNFAPIINHVAR	10090	2	2	1	7.3	58.886	41261000	0	0	3286200	0	0	1353700	9754400	5273700	9081300	3043500	3177200	6291400	0	0	3464300	0	0	1453700	4786800	1822000	5331400	2400600	2154500	2982100
P46108	Adapter molecule crk	CRK	sp|P46108|CRK_HUMAN Adapter molecule crk OS=Homo sapiens OX=9606 GN=CRK PE=1 SV=2	Homo sapiens	ALFDFNGNDEEDLPFKKGDILR	9606	1	1	0	7.2	33.83	7542600	0	0	0	0	0	0	0	5235400	0	0	2307200	0	0	0	0	0	0	0	0	3242000	0	0	1244100	0
Q9CZU6	Citrate synthase, mitochondrial	Cs	sp|Q9CZU6|CISY_MOUSE Citrate synthase, mitochondrial OS=Mus musculus OX=10090 GN=Cs PE=1 SV=1	Mus musculus	ALGVLAQLIWSR;DYIWNTLNSGR;EGSSIGAIDSR;FRGYSIPECQK;GLVYETSVLDPDEGIR;GLVYETSVLDPDEGIRFR;VVPGYGHAVLR	10090	7	7	2	15.5	51.736	387370000	21730000	68635000	17051000	33325000	40134000	18683000	11519000	58439000	11713000	12843000	38900000	54399000	9877000	15303000	10264000	9031400	16213000	6964700	9733000	15404000	8577600	15331000	15015000	17160000
Q8VHY0	Chondroitin sulfate proteoglycan 4	Cspg4	sp|Q8VHY0|CSPG4_MOUSE Chondroitin sulfate proteoglycan 4 OS=Mus musculus OX=10090 GN=Cspg4 PE=1 SV=3	Mus musculus	AHLQGPTGTSVAGPQTSEAFVITVR;DGQSVTSFSQR;DLEEGQLGLEVGKPEGR;GTDNDSGPEDLVYTIEQPSNGR;LLTTDDVAFSDADSGFSDAQLVLTRK;RGNLLLQGTR	10090	6	6	6	4.8	252.31	72991000	5698200	3623200	4336500	4843700	4752900	6257400	3403300	11217000	9019900	1327000	4663300	13848000	2346200	1700800	1527300	1045700	1394900	1850100	1782900	1835400	1976000	1848500	2153400	2511900
P21291	Cysteine and glycine-rich protein 1	CSRP1	sp|P21291|CSRP1_HUMAN Cysteine and glycine-rich protein 1 OS=Homo sapiens OX=9606 GN=CSRP1 PE=1 SV=3	Homo sapiens	CSQAVYAAEK;GFGFGQGAGALVHSE;GYGYGQGAGTLSTDK;NLDSTTVAVHGEEIYCK	9606	4	4	0	29.5	20.567	334330000	11130000	36974000	15362000	17836000	35656000	18035000	26656000	24775000	62103000	16327000	37037000	32441000	8063200	13003000	11325000	12082000	5779100	7971600	14328000	13501000	18513000	9464400	13868000	12311000
Q99LI7	Cleavage stimulation factor subunit 3	Cstf3	sp|Q99LI7|CSTF3_MOUSE Cleavage stimulation factor subunit 3 OS=Mus musculus OX=10090 GN=Cstf3 PE=1 SV=1	Mus musculus	MSGDAAAEQAAEYVPEKVKK	10090	1	1	1	2.8	82.876	15077000	0	0	0	0	0	0	0	5958800	0	0	9118200	0	0	0	0	0	0	0	0	3689900	0	0	4916900	0
P26231	Catenin alpha-1	Ctnna1	sp|P26231|CTNA1_MOUSE Catenin alpha-1 OS=Mus musculus OX=10090 GN=Ctnna1 PE=1 SV=1;sp|Q61301|CTNA2_MOUSE Catenin alpha-2 OS=Mus musculus OX=10090 GN=Ctnna2 PE=1 SV=3	Mus musculus	NAGNEQDLGIQYK;TSVQTEDDQLIAGQSAR	10090	2	2	0	3.3	100.11	14716000	0	0	647730	1696600	0	3231800	2428200	370710	1847200	1455200	1202700	1836000	0	0	647430	1778900	0	803860	1805500	214670	620750	467610	821160	1136500
P35222	Catenin beta-1	CTNNB1	sp|P35222|CTNB1_HUMAN Catenin beta-1 OS=Homo sapiens OX=9606 GN=CTNNB1 PE=1 SV=1	Homo sapiens	HQEAEMAQNAVR;LLNDEDQVVVNK;NEGVATYAAAVLFR	9606	3	3	0	4.9	85.496	6281500	363400	296910	0	662460	0	485440	793690	3323900	355680	0	0	0	402090	306450	0	533720	0	352750	619880	1004500	215900	0	0	0
P07339	Cathepsin D	CTSD	sp|P07339|CATD_HUMAN Cathepsin D OS=Homo sapiens OX=9606 GN=CTSD PE=1 SV=1	Homo sapiens	AIGAVPLIQGEYMIPCEK	9606	1	1	0	4.4	44.552	4626800	447630	0	0	0	0	0	0	0	2515500	0	0	1663600	675040	0	0	0	0	0	0	0	1272000	0	0	957970
P56395	Cytochrome b5	Cyb5a	sp|P56395|CYB5_MOUSE Cytochrome b5 OS=Mus musculus OX=10090 GN=Cyb5a PE=1 SV=2	Mus musculus	AGQSDKDVKYYTLEEIQK;ELSKTYIIGELHPDDR;EQAGGDATENFEDVGHSTDAR;FLEEHPGGEEVLR;TYIIGELHPDDR	10090	5	5	3	50.7	15.241	382140000	17619000	8579100	64220000	24058000	33746000	10798000	13087000	29547000	22342000	22620000	49144000	86380000	18061000	6231400	16735000	13293000	9330000	8637000	11466000	16070000	8927300	25710000	12058000	16730000
Q9CQX2	Cytochrome b5 type B	Cyb5b	sp|Q9CQX2|CYB5B_MOUSE Cytochrome b5 type B OS=Mus musculus OX=10090 GN=Cyb5b PE=1 SV=1	Mus musculus	ATPEASGSGEKVEGSEPSVTYYR;FLSEHPGGEEVLLEQAGADATESFEDVGHSPDAR	10090	2	2	2	39	16.318	40592000	0	6851900	3262500	2835000	571860	6756600	5215700	3668600	0	3303200	3103200	5023300	0	2851900	5722700	719680	627470	3848100	2720600	1482900	0	1722500	1371900	1687400
Q9DCN2	NADH-cytochrome b5 reductase 3	Cyb5r3	sp|Q9DCN2|NB5R3_MOUSE NADH-cytochrome b5 reductase 3 OS=Mus musculus OX=10090 GN=Cyb5r3 PE=1 SV=3	Mus musculus	DILLRPELEELR;IGDTIEFRGPNGLLVYQGK;LIDKEVISPDTR;LIDKEVISPDTRR;STPAITLENPDIKYPLR	10090	5	5	4	20.3	34.127	464750000	25662000	101960000	27287000	28594000	49511000	14130000	78400000	24209000	15675000	29000000	22616000	47706000	13171000	23157000	15088000	13108000	15630000	16205000	34684000	19074000	15550000	22068000	23528000	17773000
Q9D0M3	Cytochrome c1, heme protein, mitochondrial	Cyc1	sp|Q9D0M3|CY1_MOUSE Cytochrome c1, heme protein, mitochondrial OS=Mus musculus OX=10090 GN=Cyc1 PE=1 SV=1	Mus musculus	AANNGALPPDLSYIVR;GLLSSLDHTSIR;HGGEDYVFSLLTGYCEPPTGVSLR;LSDYFPKPYPNPEAAR	10090	4	4	1	20.9	35.327	66138000	1798800	4135900	845950	4772500	4593900	20616000	8302400	2944800	2917000	10944000	1141300	3125400	1133500	1455900	0	2188900	1601000	6128600	2650300	1234700	1648900	4127600	1064600	0
P62897	Cytochrome c, somatic	Cycs	sp|P62897|CYC_MOUSE Cytochrome c, somatic OS=Mus musculus OX=10090 GN=Cycs PE=1 SV=2	Mus musculus	ADLIAYLKKATNE;KTGQAAGFSYTDANKNK;TGPNLHGLFGR;TGQAAGFSYTDANK;TGQAAGFSYTDANKNK	10090	5	5	3	39	11.605	131220000	10579000	11183000	10116000	2364900	18167000	9387200	6447900	12602000	5899100	9086400	11193000	24195000	6674500	4494100	6717800	1866500	7450100	10186000	4747000	3846600	6168900	6092400	3391400	6048700
Q9D172	ES1 protein homolog, mitochondrial	D10Jhu81e	sp|Q9D172|GAL3A_MOUSE Glutamine amidotransferase-like class 1 domain-containing protein 3A, mitochondrial OS=Mus musculus OX=10090 GN=Gatd3a PE=1 SV=1	Mus musculus	GKITSLAQLNAANHDAAIFPGGFGAAK;ITSLAQLNAANHDAAIFPGGFGAAK	10090	2	2	2	10.2	28.09	146950000	0	14855000	5910500	0	22447000	55177000	0	0	9962000	24889000	5375400	8334000	0	8753200	5734400	0	10517000	27041000	0	0	7013200	16516000	2019700	9978300
P31786	Acyl-CoA-binding protein	Dbi	sp|P31786|ACBP_MOUSE Acyl-CoA-binding protein OS=Mus musculus OX=10090 GN=Dbi PE=1 SV=2	Mus musculus	SQAEFDKAAEEVK;SQAEFDKAAEEVKR	10090	2	2	2	16.1	10	349540000	1863700	12921000	104390000	12271000	11162000	37167000	35773000	2883300	12241000	54048000	27898000	36926000	9961400	9577700	61021000	10138000	8791400	18051000	16885000	9542900	26964000	35042000	14317000	13699000
P28654	Decorin	Dcn	sp|P28654|PGS2_MOUSE Decorin OS=Mus musculus OX=10090 GN=Dcn PE=1 SV=1	Mus musculus	ASYSAVSLYGNPVR;ASYSAVSLYGNPVRYWEIFPNTFR;DLHTLILVNNK;DLHTLILVNNKISK;EGAFKNLKDLHTLILVNNK;ELHLDNNK;ELHLDNNKLLR;ISPEAFKPLVK;ISPEAFKPLVKLER;KASYSAVSLYGNPVR;KASYSAVSLYGNPVRYWEIFPNTFR;KSDFNGLNNVLVIELGGNPLK;KSDFNGLNNVLVIELGGNPLKNSGIENGAFQGLK;LRKSDFNGLNNVLVIELGGNPLK;LYLSKNQLK;NLKDLHTLILVNNK;NLKDLHTLILVNNKISK;NSGIENGAFQGLK;SDFNGLNNVLVIELGGNPLK;SDFNGLNNVLVIELGGNPLKNSGIENGAFQGLK;TLQELRVHENEITKLR;VDAPSLKGLINL…	10090	25	25	23	50.6	39.809	2152400000	77444000	102760000	84865000	206670000	157610000	137240000	132840000	166360000	206990000	93945000	514170000	271480000	30949000	31072000	28498000	39114000	45503000	22322000	43094000	44651000	35505000	26563000	49855000	54332000
Q99KJ8	Dynactin subunit 2	Dctn2	sp|Q99KJ8|DCTN2_MOUSE Dynactin subunit 2 OS=Mus musculus OX=10090 GN=Dctn2 PE=1 SV=3	Mus musculus	ENLATVEGNFASIDAR;WSPVASTLPELVQR	10090	2	2	2	7.5	44.116	25493000	978570	3644400	1452100	914720	3370500	1356200	2083000	0	2846600	3129900	2445200	3272400	992930	1866700	1192000	593250	1606100	792830	805480	0	1283000	2734400	957520	1330200
Q99LD8	N(G),N(G)-dimethylarginine dimethylaminohydrolase 2	Ddah2	sp|Q99LD8|DDAH2_MOUSE N(G),N(G)-dimethylarginine dimethylaminohydrolase 2 OS=Mus musculus OX=10090 GN=Ddah2 PE=1 SV=1	Mus musculus	AGAGLSSLCLVLSTRPHC;GGGDLPNSQEALQK;GVPESLASGEGAGAGLPALDLAK;LSDVTLVPVSCSELEK;TVVAGSSEAAQK;TVVAGSSEAAQKAVR	10090	6	6	3	30.2	29.645	138650000	10819000	9997900	7230700	4641800	23400000	14202000	12878000	16972000	14320000	1478400	14187000	8520400	4264200	2832600	3999900	1604300	5814300	3092900	6033900	6474300	3226500	1317800	3700000	1899200
Q9Z1N5	Spliceosome RNA helicase Ddx39b	Ddx39b	sp|Q9Z1N5|DX39B_MOUSE Spliceosome RNA helicase Ddx39b OS=Mus musculus OX=10090 GN=Ddx39b PE=1 SV=1	Mus musculus	AENDVDNELLDYEDDEVETAAGADGTEAPAKKDVK	10090	1	1	1	8.2	49.035	9146200	1459800	0	2023900	362520	0	0	2278500	0	0	3021400	0	0	1459800	0	2163200	350390	0	0	1566400	0	0	2601500	0	0
Q9CQ62	2,4-dienoyl-CoA reductase, mitochondrial	Decr1	sp|Q9CQ62|DECR_MOUSE 2,4-dienoyl-CoA reductase [(3E)-enoyl-CoA-producing], mitochondrial OS=Mus musculus OX=10090 GN=Decr1 PE=1 SV=1	Mus musculus	NIDVLK;NIDVLKATAEEISSK	10090	2	2	2	4.5	36.213	1587000	0	0	0	0	184590	0	646270	0	0	0	0	756160	0	0	0	0	0	0	444300	0	0	0	0	394490
P31001	Desmin	Des	sp|P31001|DESM_MOUSE Desmin OS=Mus musculus OX=10090 GN=Des PE=1 SV=3	Mus musculus	EEAENNLAAFR;EEAENNLAAFRADVDAATLAR;ELRRQVEVLTNQR;FASEANGYQDNIAR;FLEQQNAALAAEVNR;HLREYQDLLNVK;KLLEGEESR;LLEGEESR;RIESLNEEIAFLKK;TNEKVELQELNDR;TNEKVELQELNDRFANYIEK;VELQELNDR;VSDLTQAANKNNDALR;VSDLTQAANKNNDALRQAK	10090	14	9	1	29.2	53.497	142990000	10164000	14403000	11231000	22112000	14435000	2809000	5566900	6904700	20583000	678780	1316800	32787000	8464900	9073800	5275600	5856700	5356100	2471900	1711700	2845500	3535300	1129800	405000	6049600
Q3U0B3	Dehydrogenase/reductase SDR family member 11	Dhrs11	sp|Q3U0B3|DHR11_MOUSE Dehydrogenase/reductase SDR family member 11 OS=Mus musculus OX=10090 GN=Dhrs11 PE=1 SV=1	Mus musculus	MTRAGMERWR	10090	1	1	1	3.8	28.274	39713000	3834400	4361500	4648900	5680900	1712700	2334100	8977200	0	2711300	0	0	5451500	3410700	3067100	6626800	4081400	1863800	2019800	4327000	0	2279800	0	0	2937400
O70133	ATP-dependent RNA helicase A	Dhx9	sp|O70133|DHX9_MOUSE ATP-dependent RNA helicase A OS=Mus musculus OX=10090 GN=Dhx9 PE=1 SV=2	Mus musculus	ELDALDANDELTPLGR;TTQVPQYILDDFIQNDR	10090	2	2	1	2.4	149.47	18510000	1473700	1501800	774360	459140	508570	1834900	2604500	1447200	2249700	1046900	2582300	2027300	1478900	1071600	737840	432450	782330	910050	1306100	789880	1426600	904620	1119400	910410
Q8BMF4	Dihydrolipoyllysine-residue acetyltransferase component of pyruvate dehydrogenase complex, mitochondrial	Dlat	sp|Q8BMF4|ODP2_MOUSE Dihydrolipoyllysine-residue acetyltransferase component of pyruvate dehydrogenase complex, mitochondrial OS=Mus musculus OX=10090 GN=Dlat PE=1 SV=2	Mus musculus	GLETIASDVVSLASK;VAPAPAGVFTDIPISNIR;VAPAPAGVFTDIPISNIRR	10090	3	3	3	5.3	67.941	51442000	1826200	1062900	1858100	3327500	6348300	4468100	4827200	3753100	2175600	3407600	9324700	9062700	1981900	820070	1201900	1361100	2028600	2081400	2220300	2522200	814740	3098600	2916000	1885900
O08749	Dihydrolipoyl dehydrogenase, mitochondrial	Dld	sp|O08749|DLDH_MOUSE Dihydrolipoyl dehydrogenase, mitochondrial OS=Mus musculus OX=10090 GN=Dld PE=1 SV=2	Mus musculus	ADGSTQVIDTK;EANLAAAFGKPINF;GIEIPEVRLNLEK;NETLGGTCLNVGCIPSK;NQVTATKADGSTQVIDTK;SEEQLKEEGIEFK;VCHAHPTLSEAFR	10090	7	7	5	17.3	54.272	292520000	1819500	16409000	16195000	8734900	24032000	47386000	27980000	28451000	32297000	16760000	34520000	37933000	2916500	5871500	7057400	5315500	6299800	10661000	10364000	11730000	9984800	6770600	9022900	10338000
Q9D2G2	Dihydrolipoyllysine-residue succinyltransferase component of 2-oxoglutarate dehydrogenase complex, mitochondrial	Dlst	sp|Q9D2G2|ODO2_MOUSE Dihydrolipoyllysine-residue succinyltransferase component of 2-oxoglutarate dehydrogenase complex, mitochondrial OS=Mus musculus OX=10090 GN=Dlst PE=1 SV=1	Mus musculus	ASAFALQEQPVVNAVIDDATK	10090	1	1	1	4.6	48.994	8318700	0	1843100	655350	0	0	896020	1012300	543970	1110700	0	863130	1394200	0	1377300	736270	0	0	542630	617880	345780	622080	0	447870	764550
Q8C147	Dedicator of cytokinesis protein 8	Dock8	sp|Q8C147|DOCK8_MOUSE Dedicator of cytokinesis protein 8 OS=Mus musculus OX=10090 GN=Dock8 PE=1 SV=4	Mus musculus	MATLPSAERR	10090	1	1	0	0.5	238.98	43019000	7524200	9646400	0	7998100	4429900	0	0	0	2595200	0	0	10826000	6344200	6056800	0	6430500	3980400	0	0	0	2961700	0	0	6588300
Q9QZZ6	Dermatopontin	Dpt	sp|Q9QZZ6|DERM_MOUSE Dermatopontin OS=Mus musculus OX=10090 GN=Dpt PE=1 SV=1	Mus musculus	CSNNGLVAGFQSR;GATTTFSAVER;QGFSYQCPHGQVVVAVR;YFESVLDR;YFESVLDREWQFYCCR	10090	5	5	2	28.4	23.995	178210000	2309800	16777000	4794000	8370000	20128000	2947500	7250300	13140000	17762000	4654400	47502000	32576000	1659900	5128400	1699000	6683500	7962900	1564200	4933400	4437200	7486300	2129900	11242000	15556000
O08553	Dihydropyrimidinase-related protein 2	Dpysl2	sp|O08553|DPYL2_MOUSE Dihydropyrimidinase-related protein 2 OS=Mus musculus OX=10090 GN=Dpysl2 PE=1 SV=2	Mus musculus	DNFTLIPEGTNGTEER;GLYDGPVCEVSVTPK;ILDLGITGPEGHVLSRPEEVEAEAVNR;ISVGSDADLVIWDPDSVK;KKGTVVYGEPITASLGTDGSHYWSK;SITIANQTNCPLYVTK	10090	6	6	2	20.5	62.277	512230000	8946600	27528000	68695000	15362000	13203000	29940000	19284000	51443000	22589000	165490000	60681000	29067000	15401000	21066000	27420000	32525000	8261500	26669000	29064000	14888000	13058000	59739000	33297000	13181000
Q62188	Dihydropyrimidinase-related protein 3	Dpysl3	sp|Q62188|DPYL3_MOUSE Dihydropyrimidinase-related protein 3 OS=Mus musculus OX=10090 GN=Dpysl3 PE=1 SV=1	Mus musculus	IAVGSDSDLVIWDPDALK;IAVGSDSDLVIWDPDALKIVSAK	10090	2	2	2	4	61.936	16251000	0	825210	690320	1486300	1644500	0	1449900	1087200	3071900	741150	1871500	3382800	0	531470	631170	1040300	851270	0	1164800	477920	2268100	566060	720610	2062300
Q91ZU6	Dystonin	Dst	sp|Q91ZU6|DYST_MOUSE Dystonin OS=Mus musculus OX=10090 GN=Dst PE=1 SV=2	Mus musculus	ALQEDILLR;KQQLDSALR;SAETNIDQDITNLK	10090	3	3	3	0.4	834.21	42181000	0	2862000	1019500	1531500	0	13510000	5555000	4156300	3105300	909740	2849600	6681500	0	1669800	1263600	1549900	0	3078400	4410000	1486000	1870300	1014000	1589000	2007700
Q9R0P5	Destrin	Dstn	sp|Q9R0P5|DEST_MOUSE Destrin OS=Mus musculus OX=10090 GN=Dstn PE=1 SV=3	Mus musculus	ASGVQVADEVCR;EILVGDVGATITDPFK;KFPGIKHEYQANGPEDLNR;YALYDASFETK	10090	4	4	2	35.2	18.521	132170000	9390200	7650700	8021500	7456800	17769000	16651000	6635800	11608000	10590000	6340800	13857000	16204000	5580900	3304200	4809800	4283700	5238000	5877000	3105500	4521600	3262400	3363100	4406700	5043500
Q9D7X3	Dual specificity protein phosphatase 3	Dusp3	sp|Q9D7X3|DUS3_MOUSE Dual specificity protein phosphatase 3 OS=Mus musculus OX=10090 GN=Dusp3 PE=1 SV=1	Mus musculus	VYVGNASVAQDITQLQK	10090	1	1	1	9.2	20.472	24785000	1208100	0	1862900	648090	0	7039100	1290400	1734900	3491500	1670200	2825200	3015100	1082800	0	1642100	626420	0	4331600	837140	1147400	2356300	1252100	1627200	1680100
Q9JHU4	Cytoplasmic dynein 1 heavy chain 1	Dync1h1	sp|Q9JHU4|DYHC1_MOUSE Cytoplasmic dynein 1 heavy chain 1 OS=Mus musculus OX=10090 GN=Dync1h1 PE=1 SV=2	Mus musculus	KLVPLLLEDGGDAPAALEAALEEK	10090	1	1	1	0.5	532.04	16741000	0	413680	0	1734500	5334400	1012300	1734200	0	1873700	977530	1899000	1761700	0	281350	0	1728900	2015200	505930	1229500	0	1221000	692860	729620	947840
O88487	Cytoplasmic dynein 1 intermediate chain 2	Dync1i2	sp|O88487|DC1I2_MOUSE Cytoplasmic dynein 1 intermediate chain 2 OS=Mus musculus OX=10090 GN=Dync1i2 PE=1 SV=1	Mus musculus	SVSTPSEAGSQDSGDGAVGSR	10090	1	1	0	3.4	68.393	7693200	203880	0	0	0	0	6549400	375380	0	0	564480	0	0	475650	0	0	0	0	3328100	318260	0	0	599380	0	0
P62627	Dynein light chain roadblock-type 1	Dynlrb1	sp|P62627|DLRB1_MOUSE Dynein light chain roadblock-type 1 OS=Mus musculus OX=10090 GN=Dynlrb1 PE=1 SV=3	Mus musculus	AEVEETLKR;EIDPQNDLTFLR	10090	2	2	1	21.9	10.99	14518000	5999600	869820	0	1954200	0	0	0	0	2310500	512310	2871700	0	4903400	826080	0	0	0	0	0	0	0	1329600	0	0
P70245	3-beta-hydroxysteroid-Delta(8),Delta(7)-isomerase	Ebp	sp|P70245|EBP_MOUSE 3-beta-hydroxysteroid-Delta(8),Delta(7)-isomerase OS=Mus musculus OX=10090 GN=Ebp PE=1 SV=3	Mus musculus	TTNTVPLHPYWPR	10090	1	1	1	5.7	26.215	10932000	0	0	263950	661570	0	994480	1492800	709520	647690	5023300	1139200	0	0	0	618140	930610	0	732750	1178900	771400	744500	2420300	912160	0
O35459	Delta(3,5)-Delta(2,4)-dienoyl-CoA isomerase, mitochondrial	Ech1	sp|O35459|ECH1_MOUSE Delta(3,5)-Delta(2,4)-dienoyl-CoA isomerase, mitochondrial OS=Mus musculus OX=10090 GN=Ech1 PE=1 SV=1	Mus musculus	VIGNQSLVNELTFSAR	10090	1	1	1	4.9	36.118	29122000	2827900	1456400	1089000	1764000	2405400	2677600	4401100	2919300	1118700	1130500	3575100	3757300	2821100	1032900	1161100	1734100	1604400	1539000	3018300	1803400	705180	971030	1939000	1955500
Q8BH95	Enoyl-CoA hydratase, mitochondrial	Echs1	sp|Q8BH95|ECHM_MOUSE Enoyl-CoA hydratase, mitochondrial OS=Mus musculus OX=10090 GN=Echs1 PE=1 SV=1	Mus musculus	NSSVGLIQLNRPK	10090	1	1	1	4.5	31.474	33004000	820640	998680	3262800	538130	2599500	2064000	1133100	8463600	3658200	3239500	6225600	0	820640	710000	3487300	520120	1738000	1189200	778970	5241000	2311500	2789200	3357100	0
P42125	Enoyl-CoA delta isomerase 1, mitochondrial	Eci1	sp|P42125|ECI1_MOUSE Enoyl-CoA delta isomerase 1, mitochondrial OS=Mus musculus OX=10090 GN=Eci1 PE=1 SV=2	Mus musculus	ALQLGTLFSPAEALK;ALQLGTLFSPAEALKVGVVDEVVPEDQVHSK;VGVVDEVVPEDQVHSK	10090	3	3	3	10.7	32.25	86031000	6990600	10580000	4634900	9355900	4788900	5345700	4987500	4057400	4119200	6315800	12201000	12654000	5971200	5591200	4387700	5979200	3290500	3165200	3680400	2114100	2674800	4654000	3125800	4420000
Q9WUR2	Enoyl-CoA delta isomerase 2, mitochondrial	Eci2	sp|Q9WUR2|ECI2_MOUSE Enoyl-CoA delta isomerase 2 OS=Mus musculus OX=10090 GN=Eci2 PE=1 SV=2	Mus musculus	QNYVDLVSSLSSSSEAPSQGKR	10090	1	1	1	5.6	43.267	14667000	3374400	4341300	771460	815320	0	925140	1927700	0	1544500	966900	0	0	3214300	3096300	960600	790550	0	534720	1329500	0	979050	835170	0	0
Q61508	Extracellular matrix protein 1	Ecm1	sp|Q61508|ECM1_MOUSE Extracellular matrix protein 1 OS=Mus musculus OX=10090 GN=Ecm1 PE=1 SV=2	Mus musculus	RFRAVPR	10090	1	1	1	1.3	62.832	330860	0	0	0	330860	0	0	0	0	0	0	0	0	0	0	0	0	0	0	0	0	0	0	0	0
P10126	Elongation factor 1-alpha 1	Eef1a1	sp|P10126|EF1A1_MOUSE Elongation factor 1-alpha 1 OS=Mus musculus OX=10090 GN=Eef1a1 PE=1 SV=3;sp|P62631|EF1A2_MOUSE Elongation factor 1-alpha 2 OS=Mus musculus OX=10090 GN=Eef1a2 PE=1 SV=1	Mus musculus	IGGIGTVPVGR	10090	1	1	0	2.4	50.113	83395000	8484500	5006300	5205900	3160700	13275000	8927200	5529700	7730200	9620100	5071900	6193600	5190400	8450800	3545000	5549600	3042800	8189300	5123000	3786500	4895500	5974000	4534900	3626800	3045200
P13639	Elongation factor 2	EEF2	sp|P13639|EF2_HUMAN Elongation factor 2 OS=Homo sapiens OX=9606 GN=EEF2 PE=1 SV=4	Homo sapiens	AYLPVNESFGFTADLR;ETVSEESNVLCLSK;KIWCFGPDGTGPNILTDITK	9606	3	3	0	5.8	95.337	20114000	1719200	1090000	835140	4423800	0	3924300	876270	1983100	2353900	0	821520	2087000	1381400	565370	628600	3711500	0	1973500	661160	331260	840570	0	903410	451570
Q8BPB5	EGF-containing fibulin-like extracellular matrix protein 1	Efemp1	sp|Q8BPB5|FBLN3_MOUSE EGF-containing fibulin-like extracellular matrix protein 1 OS=Mus musculus OX=10090 GN=Efemp1 PE=1 SV=1	Mus musculus	CVNHYGGYLCLPK;CYPRNPCQDHYVLTSENR;NPCQDHYVLTSENR;TAQIIVNNEHPQQETPAAEASSGATTGTVAAR;TCQDINECETTNECR	10090	5	5	3	15.8	54.952	152730000	1866800	4955200	18416000	3377400	4639300	14127000	3658300	25144000	37192000	7721500	20350000	11281000	3519500	2495800	4010900	1606100	5055200	10055000	3240500	6048600	16308000	2391200	3451800	4092000
Q9WVJ9	EGF-containing fibulin-like extracellular matrix protein 2	Efemp2	sp|Q9WVJ9|FBLN4_MOUSE EGF-containing fibulin-like extracellular matrix protein 2 OS=Mus musculus OX=10090 GN=Efemp2 PE=1 SV=1	Mus musculus	CVEPYVQVSDNR;IGPECVDIDECR	10090	2	2	1	5.4	49.425	13721000	1336100	1187100	1608800	410100	566800	1849000	538320	525310	1474300	1897100	0	2327800	936400	638570	1626200	540990	684350	640260	513840	344260	985870	585350	0	713280
Q8BH64	EH domain-containing protein 2	Ehd2	sp|Q8BH64|EHD2_MOUSE EH domain-containing protein 2 OS=Mus musculus OX=10090 GN=Ehd2 PE=1 SV=1	Mus musculus	LEGHGLPTNLPR;LFELEEQDLFR;LLEALDDMLAQDIAK;SKYDEIFYNLAPADGKLSGSK	10090	4	4	2	10.9	61.174	91967000	13518000	18328000	1976400	6427800	8579700	7264600	8217400	8417100	3240000	5252900	4845600	5899400	5625700	8283700	1833800	4741400	6095100	4295400	6241800	2093900	2429400	4083600	1953200	3396300
Q9EQP2	EH domain-containing protein 4	Ehd4	sp|Q9EQP2|EHD4_MOUSE EH domain-containing protein 4 OS=Mus musculus OX=10090 GN=Ehd4 PE=1 SV=1	Mus musculus	DKPVYDELFYTLSPINGK;DKPVYDELFYTLSPINGKISGVNAK;EGADEEEWVVAK;EYQISAGDFPEVK	10090	4	4	0	9.2	61.48	68228000	5685200	8960200	4808400	1030100	2927900	4972600	5526500	7882200	4969500	2379500	9880700	9205200	3372400	1797200	1862800	816370	1559500	2012200	1654100	3353100	1217900	1093700	2124100	1933100
Q99K41	EMILIN-1	Emilin1	sp|Q99K41|EMIL1_MOUSE EMILIN-1 OS=Mus musculus OX=10090 GN=Emilin1 PE=1 SV=1	Mus musculus	DSIISEINRLQQEATEHVTESEER;FRGLEEGQAQAGQCPSLEGR;RLDVVTGSLTVLSGRR;VAFSAALSLPR	10090	4	4	3	7	107.58	33991000	1034400	5819100	0	2082900	0	892920	5689900	534770	4541600	4061500	2370800	6963500	1364900	2327100	0	1904100	0	1559000	1951900	1717100	1685500	2509600	2381300	2371600
Q8C522	Endonuclease domain-containing 1 protein	Endod1	sp|Q8C522|ENDD1_MOUSE Endonuclease domain-containing 1 protein OS=Mus musculus OX=10090 GN=Endod1 PE=1 SV=2	Mus musculus	ILEVVNQVQDEER	10090	1	1	1	2.6	55.262	66669000	9535800	3507400	4396400	4364900	6797500	7294200	6385000	4888300	2726600	2974200	4274800	9523900	9535800	2493600	4699000	4218900	4544700	4202500	4389500	3027000	1722900	2560900	2305200	4968700
P17182	Alpha-enolase	Eno1	sp|P17182|ENOA_MOUSE Alpha-enolase OS=Mus musculus OX=10090 GN=Eno1 PE=1 SV=3	Mus musculus	AAVPSGASTGIYEALELR;AGYTDQVVIGMDVAASEFYR;DATNVGDEGGFAPNILENK;DATNVGDEGGFAPNILENKEALELLK;EIFDSRGNPTVEVDLYTAKGLFR;GVSQAVEHINK;GVSQAVEHINKTIAPALVSK;HIADLAGNPEVILPVPAFNVINGGSHAGNK;YGKDATNVGDEGGFAPNILENK;YGKDATNVGDEGGFAPNILENKEALELLK;YITPDQLADLYK	10090	11	11	8	35	47.14	205620000	11862000	12118000	9345100	6333900	26697000	16557000	19182000	34050000	13695000	13884000	23842000	18053000	4744900	2758200	5505000	2276600	4475800	4336700	4782200	4749700	3215100	5427100	5283000	4570600
P09104	Gamma-enolase	ENO2	sp|P09104|ENOG_HUMAN Gamma-enolase OS=Homo sapiens OX=9606 GN=ENO2 PE=1 SV=3	Homo sapiens	AAVPSGASTGIYEALELR;IEEELGDEAR;SIEKIWAR;YITGDQLGALYQDFVR	9606	4	3	0	12	47.268	29951000	538070	2933400	2137100	1000500	782250	6169000	3368700	1831700	4681700	3390100	3118500	0	806620	1543600	1305800	886210	512760	1875000	1644400	806150	1289400	1294700	1020400	0
P21550	Beta-enolase	Eno3	sp|P21550|ENOB_MOUSE Beta-enolase OS=Mus musculus OX=10090 GN=Eno3 PE=1 SV=3	Mus musculus	AAVPSGASTGIYEALELR;HIADLAGNPDLVLPVPAFNVINGGSHAGNK;IEEALGDKAVFAGR;YGKDATNVGDEGGFAPNILENNEALELLK	10090	4	3	2	21	47.024	31637000	6811600	2191400	590740	0	3581000	4785700	1730100	0	2011100	1705100	8230700	0	3157400	691150	649670	0	1964700	3057900	1191900	0	1589600	1771300	1965100	0
P55772	Ectonucleoside triphosphate diphosphohydrolase 1	Entpd1	sp|P55772|ENTP1_MOUSE Ectonucleoside triphosphate diphosphohydrolase 1 OS=Mus musculus OX=10090 GN=Entpd1 PE=1 SV=1	Mus musculus	DIQVSSGGVLKDPCFNPGYEK;LYGEDYTVYTHSFLCYGKDQALWQK	10090	2	2	2	9	57.205	68872000	0	30989000	1585400	2829700	2846900	0	6801600	0	4209600	5698400	3564900	10346000	0	0	0	1818100	1783600	0	2211000	0	2023900	3315100	1351100	3758400
O55026	Ectonucleoside triphosphate diphosphohydrolase 2	Entpd2	sp|O55026|ENTP2_MOUSE Ectonucleoside triphosphate diphosphohydrolase 2 OS=Mus musculus OX=10090 GN=Entpd2 PE=1 SV=2	Mus musculus	AGQSLVECLEQALR;AGQSLVECLEQALRDVPK;GGGISSYANDPSR;GGGISSYANDPSRAGQSLVECLEQALR;VLEAVTQTLTR;VLEAVTQTLTRYPFDFRGAR	10090	6	6	6	10.3	54.319	190330000	35479000	20564000	11298000	10395000	17980000	24789000	16980000	9374200	11488000	11236000	10553000	10199000	18211000	5358100	9142100	3886600	4045700	2886800	5121200	3518800	2965600	4253300	2741900	2582500
Q9D379	Epoxide hydrolase 1	Ephx1	sp|Q9D379|HYEP_MOUSE Epoxide hydrolase 1 OS=Mus musculus OX=10090 GN=Ephx1 PE=1 SV=2	Mus musculus	GGHFAAFEEPK;NIYSLTPLLGQR	10090	2	2	2	5.1	52.576	22905000	1682400	2031700	839150	1180500	1750000	2023600	2482200	2345600	2715900	1530300	0	4323600	1497800	1387900	1093600	1233500	1249100	1246900	1508500	1391700	1902300	1325500	0	1464200
P84089	Enhancer of rudimentary homolog	Erh	sp|P84089|ERH_MOUSE Enhancer of rudimentary homolog OS=Mus musculus OX=10090 GN=Erh PE=1 SV=1	Mus musculus	SHTILLVQPTKRPEGR	10090	1	1	0	15.4	12.259	264050000	22366000	54518000	4428000	4626000	22848000	6762500	45113000	19169000	9627400	34130000	15199000	25264000	22097000	33917000	4676000	4417500	12695000	3374600	24184000	9595100	6010200	25009000	7084000	10312000
O94905	Erlin-2	ERLIN2	sp|O94905|ERLN2_HUMAN Erlin-2 OS=Homo sapiens OX=9606 GN=ERLIN2 PE=1 SV=1;sp|O75477|ERLN1_HUMAN Erlin-1 OS=Homo sapiens OX=9606 GN=ERLIN1 PE=1 SV=2	Homo sapiens	ISEIEDAAFLAR	9606	1	1	0	3.5	37.839	7068200	0	0	0	1037400	0	1562100	742280	0	668430	592940	1502300	962730	0	0	0	1002700	0	900020	510300	0	422360	510530	810110	502260
P57759	Endoplasmic reticulum resident protein 29	Erp29	sp|P57759|ERP29_MOUSE Endoplasmic reticulum resident protein 29 OS=Mus musculus OX=10090 GN=Erp29 PE=1 SV=2	Mus musculus	DGDLENPVLYNGAVK	10090	1	1	1	5.7	28.823	5382300	0	827790	0	0	0	913280	1643700	562570	1435000	0	0	0	0	598350	0	0	0	565780	829110	460360	1046200	0	0	0
Q925F2	Endothelial cell-selective adhesion molecule	Esam	sp|Q925F2|ESAM_MOUSE Endothelial cell-selective adhesion molecule OS=Mus musculus OX=10090 GN=Esam PE=1 SV=1	Mus musculus	LGALQEGDSGTYR	10090	1	1	1	3.3	41.81	9081800	525380	0	0	438540	0	845970	0	3352200	2169500	708800	0	1041500	606370	0	0	516190	0	514800	0	1699300	1447900	678480	0	573870
Q3U7R1	Extended synaptotagmin-1	Esyt1	sp|Q3U7R1|ESYT1_MOUSE Extended synaptotagmin-1 OS=Mus musculus OX=10090 GN=Esyt1 PE=1 SV=2	Mus musculus	ALTLGALTLPLAR;ATYSTNSPVWEEAFR;FEWDLPLDGTLR;IHVLEAQDLIAK	10090	4	4	2	4.8	121.55	39949000	2271700	2495000	2572100	1939200	3341300	4158500	5755500	5563700	2958200	1547500	3641200	3705500	1174300	1831700	1085300	699060	1512600	1445500	1512800	1449500	1043000	1133400	1385700	1087700
Q9DCW4	Electron transfer flavoprotein subunit beta	Etfb	sp|Q9DCW4|ETFB_MOUSE Electron transfer flavoprotein subunit beta OS=Mus musculus OX=10090 GN=Etfb PE=1 SV=3	Mus musculus	GIHVEIPGAQAESLGPLQVAR	10090	1	1	1	8.2	27.623	64415000	1128700	0	4392600	0	2316500	4692400	283340	45729000	0	0	2069200	3803500	1958300	0	6423000	0	3221800	5623900	452910	11858000	0	0	2321100	4127800
Q921G7	Electron transfer flavoprotein-ubiquinone oxidoreductase, mitochondrial	Etfdh	sp|Q921G7|ETFD_MOUSE Electron transfer flavoprotein-ubiquinone oxidoreductase, mitochondrial OS=Mus musculus OX=10090 GN=Etfdh PE=1 SV=1	Mus musculus	ALNEGGLQSIPK;FCPAGVYEFVPLEQGDGFR;GAPLNTPVTEDR;GIATNDVGIQK;NLSIYDGPEQR;SGSLAAESIFKQLTSENLQSK	10090	6	6	3	14	68.09	97212000	6822600	4483200	4709100	692410	4688100	13474000	11014000	5019000	6514400	9968400	17405000	12421000	2612300	3078800	2421000	2258000	1829900	5083700	2375700	2018700	1752100	3971500	3844200	3090600
Q8BH61	Coagulation factor XIII A chain	F13a1	sp|Q8BH61|F13A_MOUSE Coagulation factor XIII A chain OS=Mus musculus OX=10090 GN=F13a1 PE=1 SV=3	Mus musculus	GVNLKDYLNVTAVHLFK	10090	1	1	1	2.3	83.206	23048000	701530	1977200	1156200	509820	4864300	0	1726400	4367400	2345400	483350	1539100	3376900	786320	1705000	1202300	603320	2484300	0	1166500	2163300	1797600	531520	891970	2137000
P19221	Prothrombin	F2	sp|P19221|THRB_MOUSE Prothrombin OS=Mus musculus OX=10090 GN=F2 PE=1 SV=1	Mus musculus	EECSVPVCGQEGR;GRLYQGNLAVTTLGSPCLPWNSLPAK;YQDFDPEVK	10090	3	3	3	7.8	70.268	36509000	395890	2377500	3948100	1660800	2462700	4696900	2007400	7331400	7899300	579430	1975200	1174500	352260	1203200	4691900	483490	1327600	3489100	1087200	2854400	2024800	1130200	1874000	605390
Q8BP22	Protein FAM92A1	Fam92a1	sp|Q8BP22|FA92A_MOUSE Protein FAM92A OS=Mus musculus OX=10090 GN=Fam92a PE=1 SV=1	Mus musculus	MPSGLPCPALDRRGAR	10090	1	1	1	4.5	39.958	12882000	0	0	2508500	3471100	0	4304900	2598000	0	0	0	0	0	0	0	0	0	0	0	0	0	0	0	0	0
P19096	Fatty acid synthase	Fasn	sp|P19096|FAS_MOUSE Fatty acid synthase OS=Mus musculus OX=10090 GN=Fasn PE=1 SV=2	Mus musculus	GGNVGINSFGFGGSNVHVILQPNTR;WLSTSIPEAQWQSSLAR	10090	2	2	2	1.7	272.43	38887000	598040	3714500	1913500	564310	1798500	7519900	1370300	5653100	1969300	4881500	5221500	3682800	563130	1055200	1569000	521530	1007900	2503600	822380	2556000	1037000	4111400	2359900	1183900
Q08879	Fibulin-1	Fbln1	sp|Q08879|FBLN1_MOUSE Fibulin-1 OS=Mus musculus OX=10090 GN=Fbln1 PE=1 SV=2	Mus musculus	AGFYFDGISR;CLSFECPENYRR;ENSDFVQGNGADLQDPAKIPDEEDQEDPYLNDR;GYHLNEEGTR;GYQLSDVDGVTCEDIDECALPTGGHICSYR;LGESCINTVGSFR	10090	6	6	3	15.3	78.032	176410000	3480400	27986000	30705000	5191600	12344000	26630000	6982200	6771600	11285000	3245600	23116000	18674000	1480800	10174000	14454000	2139900	4367300	8144300	1913000	1771400	3731700	1930900	4933300	5362200
Q9WVH9	Fibulin-5	Fbln5	sp|Q9WVH9|FBLN5_MOUSE Fibulin-5 OS=Mus musculus OX=10090 GN=Fbln5 PE=1 SV=1	Mus musculus	CIDPISCEEPYLLIGENR;DQPFTILYR;GPYSNPYSTSYSGPYPAAAPPVPASNYPTISRPLVCR;QSGQCLDIDECR;SCQDINECEHR;SVPADIFQMQATTRYPGAYYIFQIK;YPGAYYIFQIK	10090	7	7	2	25	50.193	533750000	38202000	33366000	34251000	52963000	45094000	42887000	32445000	24875000	82419000	27633000	41623000	77990000	10772000	10752000	12072000	21679000	14683000	7927300	10286000	4859800	14566000	7219700	7989900	12746000
Q61554	Fibrillin-1	Fbn1	sp|Q61554|FBN1_MOUSE Fibrillin-1 OS=Mus musculus OX=10090 GN=Fbn1 PE=1 SV=2	Mus musculus	ACEDIDECSLPNICVFGTCHNLPGLFR;AGYQSTLTR;CACTYGFTGPQCER;CDSGFALDSEER;CECEIGYELDR;CECFPGLAVGLDGR;CECPVGFFYNDK;CICNSGYEVDITGK;CICPPGYSLQNDK;CLCPEGFSLSSTGR;CNEGYEVAPDGR;CPAGHKFNEVSQK;CPPGFYTSPDGTR;CPTGYYLNEDTR;CPVGYVLR;CSCSPGWIGDGIK;CSNQLPQSITK;CVAPNRCACTYGFTGPQCER;CVDVRPGYCYTALANGR;EGYCFSEVLQNMCQIGSSNRNPVTK;EIPGVCENGVCINMVGSFR;GEGWGDPCELCPTEPDEAFR;GFSLDQSGASCEDVDECEGNHR;GFVYKPDLK;GQCVKPLFGAVTK;GYIGTHC…	10090	47	47	22	23.7	312.3	3280600000	99717000	237700000	248020000	453520000	134080000	581430000	280250000	157780000	347450000	209640000	310490000	220560000	23219000	40958000	63109000	68642000	29449000	56896000	43097000	29805000	49528000	50776000	40217000	34543000
Q61559	IgG receptor FcRn large subunit p51	Fcgrt	sp|Q61559|FCGRN_MOUSE IgG receptor FcRn large subunit p51 OS=Mus musculus OX=10090 GN=Fcgrt PE=1 SV=1	Mus musculus	ARPGNSGSSVLTCAAFSFYPPELK;ESEFLLNSCPER	10090	2	2	2	9.9	40.092	11481000	700550	548460	806400	419550	4272700	1266200	0	0	2089200	705210	672620	0	1206200	567110	1409000	589780	533620	1243400	0	0	541110	1083500	736200	0
E9PV24	Fibrinogen alpha chain	Fga	sp|E9PV24|FIBA_MOUSE Fibrinogen alpha chain OS=Mus musculus OX=10090 GN=Fga PE=1 SV=1	Mus musculus	AQQIQALQSNVR;EINLQDYEGHQK;EINLQDYEGHQKQLQQVIAK;GDFANANNFDNTYGQVSEDLRR	10090	4	4	4	6.8	87.428	156440000	8427200	9666800	3764300	10406000	7085800	34064000	11661000	13944000	4917200	21249000	16489000	14767000	2554600	2234500	3138400	9572500	5280900	9297400	4128600	5606900	4262900	7624600	3019200	9433400
Q8K0E8	Fibrinogen beta chain	Fgb	sp|Q8K0E8|FIBB_MOUSE Fibrinogen beta chain OS=Mus musculus OX=10090 GN=Fgb PE=1 SV=1	Mus musculus	ENENVINEYSSILEDQR;GFGNIATNEDAK;KEEPPSLRPAPPPISGGGYR;KYCGLPGEYWLGNDKISQLTR;LYIDETVNDNIPLNLR;LYIDETVNDNIPLNLRVLR;QAQVKENENVINEYSSILEDQR;RKEEPPSLRPAPPPISGGGYR;TENGGWTVIQNR;TPCTVSCNIPVVSGK;TPCTVSCNIPVVSGKECEEIIR	10090	11	11	9	26.8	54.752	268000000	300410	6375300	9152700	15582000	14093000	80036000	41390000	52222000	7029300	21476000	13211000	7126200	1196000	6466900	7808800	7908900	4236600	10212000	6312000	11514000	3273400	6677500	5306900	3833700
P97807	Fumarate hydratase, mitochondrial	Fh	sp|P97807|FUMH_MOUSE Fumarate hydratase, mitochondrial OS=Mus musculus OX=10090 GN=Fh PE=1 SV=3	Mus musculus	AAAEVNQEYGLDPK;IYELAAGGTAVGTGLNTR	10090	2	2	1	6.3	54.356	78167000	6706300	14025000	2957100	4752200	11159000	10433000	9467800	0	3174400	1840400	5795700	7856200	7278500	5101100	2090800	3350800	5435500	4382200	3648600	0	1469900	3363500	2263600	2870900
Q9CQ92	Mitochondrial fission 1 protein	Fis1	sp|Q9CQ92|FIS1_MOUSE Mitochondrial fission 1 protein OS=Mus musculus OX=10090 GN=Fis1 PE=1 SV=1	Mus musculus	GLLQTEPQNNQAK;KFQSEQAAGSVSK	10090	2	2	1	17.1	17.008	26588000	0	259690	3001300	2524000	3843900	3168900	906020	1310300	3266900	993460	4039700	3273600	0	227630	2021000	1200400	1735700	1861700	831050	1013300	2041200	426740	1520800	817350
P26883	Peptidyl-prolyl cis-trans isomerase FKBP1A	Fkbp1a	sp|P26883|FKB1A_MOUSE Peptidyl-prolyl cis-trans isomerase FKBP1A OS=Mus musculus OX=10090 GN=Fkbp1a PE=1 SV=2	Mus musculus	GVQVETISPGDGR	10090	1	1	0	12	11.922	33717000	1208900	0	6348100	1369500	2846000	2012500	1864000	7554200	4786300	2488800	0	3238400	1202700	0	6750100	1316900	2070500	1153500	1274800	4606000	3008700	2131800	0	1680800
Q8BTM8	Filamin-A	Flna	sp|Q8BTM8|FLNA_MOUSE Filamin-A OS=Mus musculus OX=10090 GN=Flna PE=1 SV=5	Mus musculus	AEVGVPAEFGIWTR;AFGPGLQGGNAGSPAR;AGVAPLQVKVQGPK;AGVAPLQVKVQGPKGLVEPVDVVDNADGTQTVNYVPSR;ALGALVDSCAPGLCPDWDSWDASKPVNNAR;ALTQTGGPHVK;ALTQTGGPHVKAR;ANLPQSFQVDTSK;ANLPQSFQVDTSKAGVAPLQVK;ANLPQSFQVDTSKAGVAPLQVKVQGPK;ASGPGLNTTGVPASLPVEFTIDAK;AWGPGLEGGIVGK;CGQSAAVASPGGSIDSR;DAGEGGLSLAIEGPSK;DAGEGLLAVQITDPEGKPK;DGSCGVAYVVQEPGDYEVSVK;DNGNGTYSCSYVPR;DVDIIDHHDNTYTVK;EAGAGGLAIAVEGPSK;EAGAGGLAIAVEGPSKAEISFEDRK;E…	10090	74	74	20	38.3	281.22	5944600000	355710000	449480000	326120000	625770000	327330000	826880000	455420000	270980000	678860000	322180000	485960000	819880000	45547000	28704000	37851000	61348000	26176000	45684000	37351000	27444000	44711000	38258000	34415000	46086000
O75369	Filamin-B	FLNB	sp|O75369|FLNB_HUMAN Filamin-B OS=Homo sapiens OX=9606 GN=FLNB PE=1 SV=2	Homo sapiens	GAGTGGLGLTVEGPCEAK;LVSPGSANETSSILVESVTR	9606	2	1	0	1.5	278.16	11238000	810480	0	790300	577230	0	2249200	993480	1477900	1075100	515160	1329100	1419900	714640	0	734610	557150	0	1523000	637580	1075600	635300	478140	658400	673060
Q14315	Filamin-C	FLNC	sp|Q14315|FLNC_HUMAN Filamin-C OS=Homo sapiens OX=9606 GN=FLNC PE=1 SV=3	Homo sapiens	GAGTGGLGLTVEGPCEAK;GVAGVPAEFSIWTR;RLTVTSLQETGLKVNQPASFAVQLNGAR;VKAEGPGLNR	9606	4	3	0	2.6	291.02	36623000	1107800	914260	689470	1442400	16726000	2932400	1173000	0	9463500	692310	1481200	0	2268800	1203100	1728900	2580400	5028500	3005900	1835900	0	2546900	0	612080	0
Q8K2I3	Dimethylaniline monooxygenase [N-oxide-forming] 2	Fmo2	sp|Q8K2I3|FMO2_MOUSE Dimethylaniline monooxygenase [N-oxide-forming] 2 OS=Mus musculus OX=10090 GN=Fmo2 PE=1 SV=3	Mus musculus	ILVVGIGNSAADIASELSK	10090	1	1	1	3.6	60.974	21615000	906890	2415600	793370	676930	2241500	1376300	773120	3613800	1550500	1285100	2227900	3753800	898150	1529100	849270	684220	1365000	803090	557320	2346500	1027300	1060100	1259800	2053500
P50608	Fibromodulin	Fmod	sp|P50608|FMOD_MOUSE Fibromodulin OS=Mus musculus OX=10090 GN=Fmod PE=2 SV=1	Mus musculus	ELHLDHNQISR;NLKYLPFVPSR;RVPDGLPSALEQLYLEHNNVYTVPDSYFR;SLILLDLSYNHLR;SLRELHLDHNQISR	10090	5	5	1	17.8	43.054	97563000	1087800	1063700	3850200	1543000	8759300	5765000	6416500	6796800	2396500	19676000	33157000	7051200	546460	1521800	1846000	2804100	3988300	2815500	3104200	5374700	1640300	5577300	11231000	4459900
P11276	Fibronectin	Fn1	sp|P11276|FINC_MOUSE Fibronectin OS=Mus musculus OX=10090 GN=Fn1 PE=1 SV=4	Mus musculus	APITGYIIR;ATGVFTTLQPLR;CTCVGNGRGEWACIPYSQLR;DAPIVNRVVTPLSPPTNLHLEANPDTGVLTVSWER;EESPPLIGQQATVSDIPR;EYLGAICSCTCFGGQR;FLTTTPNSLLVSWQAPR;GNLLQCVCTGNGR;GVTYNIIVEALQNQR;ITYGETGGNSPVQEFTVPGSK;LGVRPSQGGEAPR;LSDAGFKLTCQCLGFGSGHFR;NSITLTNLNPGTEYVVSIIAVNGR;QKTGLDSPTGFDSSDITANSFTVHWVAPR;SSPVIIDASTAIDAPSNLR;SYTITGLQPGTDYKIHLYTLNDNAR;TGLDSPTGFDSSDITANSFTVHWVAPR;TKTETITGFQVDAIPANGQTPVQR;TYLGNALVCTCYGGSR;VTWAPP…	10090	20	20	16	14.7	272.53	670440000	21440000	46089000	35693000	40120000	47912000	64067000	30941000	110980000	42700000	99849000	89072000	41578000	12867000	16344000	11622000	12193000	15373000	13861000	10160000	19484000	10440000	16975000	16606000	10521000
P29391	Ferritin light chain 1	Ftl1	sp|P29391|FRIL1_MOUSE Ferritin light chain 1 OS=Mus musculus OX=10090 GN=Ftl1 PE=1 SV=2	Mus musculus	VAGPQPAQTGAPQGSLGEYLFER	10090	1	1	1	12.6	20.802	12398000	1906400	808980	0	1176600	2029900	0	0	1186400	861390	270100	2630900	1527500	2056700	0	0	948940	0	0	0	709160	0	0	1530500	748660
P35637	RNA-binding protein FUS	FUS	sp|P35637|FUS_HUMAN RNA-binding protein FUS OS=Homo sapiens OX=9606 GN=FUS PE=1 SV=1	Homo sapiens	AAIDWFDGKEFSGNPIKVSFATR	9606	1	1	0	4.4	53.425	19629000	0	1004100	793280	0	4302800	0	0	0	1845300	0	8982300	2701300	0	643750	738750	0	2926900	0	0	0	1186300	0	4928000	1433800
P50396	Rab GDP dissociation inhibitor alpha	Gdi1	sp|P50396|GDIA_MOUSE Rab GDP dissociation inhibitor alpha OS=Mus musculus OX=10090 GN=Gdi1 PE=1 SV=3	Mus musculus	KFDLGQDVIDFTGHALALYR;KQNDVFGEADQ;NPYYGGESSSITPLEELYKR;SPYLYPLYGLGELPQGFAR;YGKSPYLYPLYGLGELPQGFAR	10090	5	3	1	16.3	50.521	51365000	1086200	7161900	3577200	515170	5751000	0	5215100	4129500	5603400	884470	12725000	4716000	1338200	1944000	3131800	1407600	3188400	0	2378500	1683700	1673400	2230400	1514900	2535800
Q61598	Rab GDP dissociation inhibitor beta	Gdi2	sp|Q61598|GDIB_MOUSE Rab GDP dissociation inhibitor beta OS=Mus musculus OX=10090 GN=Gdi2 PE=1 SV=1	Mus musculus	AYDATTHFETTCDDIKDIYKR;DLGTDSQIFISR;FVSISDLFVPK;KFDLGQDVIDFTGHSLALYR;SPYLYPLYGLGELPQGFAR;YGKSPYLYPLYGLGELPQGFAR	10090	6	6	4	19.3	50.537	190350000	8618300	8560700	10569000	9551400	28638000	30922000	14821000	13492000	15889000	7636600	18777000	22871000	6220700	5083500	6785400	4314800	9105600	5659100	6012000	4705000	5623600	5273600	5835800	6614600
Q9BVM4	Gamma-glutamylaminecyclotransferase	GGACT	sp|Q9BVM4|GGACT_HUMAN Gamma-glutamylaminecyclotransferase OS=Homo sapiens OX=9606 GN=GGACT PE=1 SV=2	Homo sapiens	MALVFVYGTLKR	9606	1	1	1	7.8	17.328	52289000	0	2305000	10989000	3726300	11710000	2074800	0	0	9690600	2653100	0	9141200	0	1638700	11745000	3601600	7829100	1195400	0	0	6123200	2284300	0	4769000
P26443	Glutamate dehydrogenase 1, mitochondrial	Glud1	sp|P26443|DHE3_MOUSE Glutamate dehydrogenase 1, mitochondrial OS=Mus musculus OX=10090 GN=Glud1 PE=1 SV=1	Mus musculus	AKIIAEGANGPTTPEADKIFLER;CAVVDVPFGGAK;CVGVGESDGSIWNPDGIDPK;DDGSWEVIEGYR;ELEDFKLQHGSILGFPK;GASIVEDKLVEDLKTR;IIAEGANGPTTPEADKIFLER;NYTDNELEKITR;VYEGSILEADCDILIPAASEK;VYEGSILEADCDILIPAASEKQLTK;YSTDVSVDEVK	10090	11	11	4	26.5	61.336	448300000	34422000	23275000	20685000	21192000	22709000	44082000	64824000	28469000	31342000	32001000	58511000	66789000	11485000	5824800	9866100	9381800	6495200	9958400	13254000	10799000	6166400	9607600	10766000	13433000
D3YU32	Testis-expressed protein 13C-1	Gm362	sp|D3YU32|T13C1_MOUSE Testis-expressed protein 13C-1 OS=Mus musculus OX=10090 GN=Tex13c1 PE=3 SV=1	Mus musculus	EEPVMPK	10090	1	1	1	1.2	67.298	2323300	0	378960	0	441800	0	0	399560	0	0	672310	430690	0	0	0	0	0	0	0	0	0	0	0	0	0
P21278	Guanine nucleotide-binding protein subunit alpha-11	Gna11	sp|P21278|GNA11_MOUSE Guanine nucleotide-binding protein subunit alpha-11 OS=Mus musculus OX=10090 GN=Gna11 PE=1 SV=1	Mus musculus	IATVGYLPTQQDVLR	10090	1	1	1	4.2	42.024	54147000	1590500	10143000	2221500	1464500	2765500	5240900	3261900	9595000	2853800	3854300	4799700	6356700	1590500	7211200	2374400	1415500	1849000	3019500	2242500	5941500	1803300	3318600	2588200	3316300
B2RSH2	Guanine nucleotide-binding protein G(i) subunit alpha-1	Gnai1	sp|B2RSH2|GNAI1_MOUSE Guanine nucleotide-binding protein G(i) subunit alpha-1 OS=Mus musculus OX=10090 GN=Gnai1 PE=1 SV=1	Mus musculus	EYQLNDSAAYYLNDLDR;IAQPNYIPTQQDVLR	10090	2	2	0	9	40.361	22416000	397110	3354000	1633800	2772200	1334500	1482900	2149900	0	2343100	801570	2688700	3458300	577180	1260000	1021100	1611200	929400	1241800	826660	0	883620	1003100	1351200	893640
P08752	Guanine nucleotide-binding protein G(i) subunit alpha-2	Gnai2	sp|P08752|GNAI2_MOUSE Guanine nucleotide-binding protein G(i) subunit alpha-2 OS=Mus musculus OX=10090 GN=Gnai2 PE=1 SV=5	Mus musculus	EYQLNDSAAYYLNDLER;IAQSDYIPTQQDVLR;ITQSSLTICFPEYTGANKYDEAASYIQSK;LWADHGVQACFGR;SREYQLNDSAAYYLNDLER	10090	5	5	1	21.4	40.489	182000000	14488000	9793600	7305300	6180500	8859100	11782000	36325000	22082000	16139000	9651700	17711000	21686000	8115700	4538800	4618400	3112300	3517100	3766700	14540000	7492100	4874000	5811700	5943700	5558000
Q9DC51	Guanine nucleotide-binding protein G(k) subunit alpha	Gnai3	sp|Q9DC51|GNAI3_MOUSE Guanine nucleotide-binding protein G(i) subunit alpha-3 OS=Mus musculus OX=10090 GN=Gnai3 PE=1 SV=3	Mus musculus	EYQLNDSASYYLNDLDR;ISQTNYIPTQQDVLR	10090	2	2	1	9	40.538	17607000	484120	887380	1125300	689220	1157800	2331000	0	2439300	3117900	1104500	1508900	2761300	723430	614790	794560	649180	754340	1308800	0	857310	1268600	926750	792920	1403900
P18872	Guanine nucleotide-binding protein G(o) subunit alpha	Gnao1	sp|P18872|GNAO_MOUSE Guanine nucleotide-binding protein G(o) subunit alpha OS=Mus musculus OX=10090 GN=Gnao1 PE=1 SV=3	Mus musculus	IGAGDYQPTEQDILR;LWGDSGIQECFNR	10090	2	2	1	7.9	40.084	39408000	394190	2080500	2435100	3037600	1659000	2362200	5862700	5078100	2593900	1003900	9012300	3888400	1006600	1422000	1863300	1772300	1066400	1308500	3874900	2170000	1575700	830990	3362400	1950300
P21279	Guanine nucleotide-binding protein G(q) subunit alpha	Gnaq	sp|P21279|GNAQ_MOUSE Guanine nucleotide-binding protein G(q) subunit alpha OS=Mus musculus OX=10090 GN=Gnaq PE=1 SV=4	Mus musculus	EVDVEKVSAFENPYVDAIK;EYQLSDSTKYYLNDLDR;RINDEIER;VADPSYLPTQQDVLR;VRVPTTGIIEYPFDLQSVIFR;VSAFENPYVDAIK	10090	6	6	1	22.3	42.158	166930000	13314000	9528600	14012000	6536900	10298000	11534000	9513900	11838000	28820000	14023000	15827000	21683000	5910400	2454600	5877800	3633100	3672100	4784800	4504500	4445600	5922000	4378800	6245300	7711200
P63092	Guanine nucleotide-binding protein G(s) subunit alpha isoforms short	GNAS	sp|P63092|GNAS2_HUMAN Guanine nucleotide-binding protein G(s) subunit alpha isoforms short OS=Homo sapiens OX=9606 GN=GNAS PE=1 SV=1;sp|Q5JWF2|GNAS1_HUMAN Guanine nucleotide-binding protein G(s) subunit alpha isoforms XLas OS=Homo sapiens OX=9606 GN=GNAS P	Homo sapiens	IEDYFPEFAR;YTTPEDATPEPGEDPR	9606	2	2	0	6.6	45.664	14354000	0	0	2450400	0	927170	1552800	498440	0	2759200	1662100	2954900	1548900	0	0	2321100	0	549370	792880	504580	0	1073300	2043900	1412200	716140
P62873	Guanine nucleotide-binding protein G(I)/G(S)/G(T) subunit beta-1	GNB1	sp|P62873|GBB1_HUMAN Guanine nucleotide-binding protein G(I)/G(S)/G(T) subunit beta-1 OS=Homo sapiens OX=9606 GN=GNB1 PE=1 SV=3	Homo sapiens	ACADATLSQITNNIDPVGR;AGVLAGHDNR;ELAGHTGYLSCCR;KACADATLSQITNNIDPVGR;LFVSGACDASAK;LFVSGACDASAKLWDVR;LLLAGYDDFNCNVWDALKADR;QTFTGHESDINAICFFPNGNAFATGSDDATCR;SELDQLRQEAEQLK;SELDQLRQEAEQLKNQIR	9606	10	10	0	38.5	37.377	708130000	66234000	48271000	39571000	21287000	72517000	63610000	43139000	29756000	43207000	99051000	130250000	51238000	35077000	32095000	18395000	14348000	32868000	31730000	30105000	16244000	24092000	37565000	42949000	17411000
P62879	Guanine nucleotide-binding protein G(I)/G(S)/G(T) subunit beta-2	GNB2	sp|P62879|GBB2_HUMAN Guanine nucleotide-binding protein G(I)/G(S)/G(T) subunit beta-2 OS=Homo sapiens OX=9606 GN=GNB2 PE=1 SV=3	Homo sapiens	ACGDSTLTQITAGLDPVGR;AGVLAGHDNR;ELPGHTGYLSCCR;KACGDSTLTQITAGLDPVGR;SELEQLRQEAEQLR;SELEQLRQEAEQLRNQIR	9606	6	5	0	17.9	37.331	550430000	23155000	9457800	43773000	10812000	43291000	43180000	57050000	32888000	43773000	154600000	41318000	47123000	17534000	26236000	40499000	11934000	22223000	21608000	35778000	24991000	20209000	34993000	20462000	18763000
Q9DAS9	Guanine nucleotide-binding protein G(I)/G(S)/G(O) subunit gamma-12	Gng12	sp|Q9DAS9|GBG12_MOUSE Guanine nucleotide-binding protein G(I)/G(S)/G(O) subunit gamma-12 OS=Mus musculus OX=10090 GN=Gng12 PE=1 SV=3	Mus musculus	SSKTASTNSIAQAR	10090	1	1	1	19.4	7.9972	24653000	1470700	525730	554000	5224600	2017600	1328400	703570	655780	1307200	446130	1699800	8719400	1462000	371550	588630	4860800	1341000	889690	480830	403680	952850	381850	911220	4522100
Q61017	Guanine nucleotide-binding protein G(I)/G(S)/G(O) subunit gamma-T2	Gngt2	sp|Q61017|GBGT2_MOUSE Guanine nucleotide-binding protein G(I)/G(S)/G(O) subunit gamma-T2 OS=Mus musculus OX=10090 GN=Gngt2 PE=3 SV=2	Mus musculus	AQDLSEKELLR	10090	1	1	1	15.9	7.8019	3423700	626210	0	234490	391920	625880	0	0	508320	544970	491920	0	0	658260	0	257320	350760	377950	0	0	305270	361980	445230	0	0
P05201	Aspartate aminotransferase, cytoplasmic	Got1	sp|P05201|AATC_MOUSE Aspartate aminotransferase, cytoplasmic OS=Mus musculus OX=10090 GN=Got1 PE=1 SV=3	Mus musculus	IANDNSLNHEYLPILGLAEFR;VGGVQSLGGTGALR	10090	2	2	0	8.5	46.247	40729000	6591100	4353000	2106300	1281400	2790300	2557700	1878600	3965800	3203500	2996700	4717900	4286400	4686400	1921800	1086300	1346800	2028700	524160	679710	2108800	1657200	1482400	1583200	1144200
P05202	Aspartate aminotransferase, mitochondrial	Got2	sp|P05202|AATM_MOUSE Aspartate aminotransferase, mitochondrial OS=Mus musculus OX=10090 GN=Got2 PE=1 SV=1	Mus musculus	ASAELALGENNEVLK;ASAELALGENNEVLKSGR;DAGMQLQGYR;DDNGKPYVLPSVR;DGRISVAGVTSGNVGYLAHAIHQVTK;DVFLPKPSWGNHTPIFR;EYLPIGGLAEFCK;FVTVQTISGTGALR;IAATILTSPDLR;IAATILTSPDLRK;IAATILTSPDLRKQWLQEVK;ILIRPLYSNPPLNGAR;ISVAGVTSGNVGYLAHAIHQVTK;MNLGVGAYRDDNGKPYVLPSVR;NLDKEYLPIGGLAEFCK;TCGFDFSGALEDISK;TQLVSNLKK	10090	17	17	10	42.8	47.411	1333600000	31006000	155090000	49336000	44804000	129940000	73719000	160170000	91286000	119600000	257440000	101060000	120130000	12305000	24915000	17148000	18417000	21582000	16067000	28276000	13827000	20224000	31456000	18032000	24288000
P06745	Glucose-6-phosphate isomerase	Gpi	sp|P06745|G6PI_MOUSE Glucose-6-phosphate isomerase OS=Mus musculus OX=10090 GN=Gpi PE=1 SV=4	Mus musculus	AALTRNPQFQK;ELQAAGKSPEDLEK;GGPRVWFVSNIDGTHIAK;HFVALSTNTAK;KIEPELEGSSAVTSHDSSTNGLISFIK;KIEPELEGSSAVTSHDSSTNGLISFIKQQR;TLASLSPETSLFIIASK;VDHQTGPIVWGEPGTNGQHAFYQLIHQGTK	10090	8	8	7	23.5	62.766	591720000	31252000	52735000	20685000	17852000	26193000	95912000	41195000	52379000	36008000	92259000	69235000	56016000	34101000	34303000	18900000	13684000	13159000	29904000	23820000	27070000	11755000	35970000	18219000	17509000
P46412	Glutathione peroxidase 3	Gpx3	sp|P46412|GPX3_MOUSE Glutathione peroxidase 3 OS=Mus musculus OX=10090 GN=Gpx3 PE=1 SV=2	Mus musculus	NSCPPTAELLGSPGR;QEPGENSEILPSLK;YVRPGGGFVPNFQLFEK	10090	3	3	2	20.4	25.424	90089000	7183100	7632800	4808100	8919700	8435700	3854200	4584800	6945300	10893000	4064600	11096000	11671000	7854400	2800700	3737900	5230500	3784100	1677000	2421600	2242200	3040500	2445600	2815000	3654500
P13020	Gelsolin	Gsn	sp|P13020|GELS_MOUSE Gelsolin OS=Mus musculus OX=10090 GN=Gsn PE=1 SV=3	Mus musculus	EVQGFESSTFSGYFK;IEGSNKVPVDPATYGQFYGGDSYIILYNYR;QTQVSVLPEGGETPLFK;QTQVSVLPEGGETPLFKQFFK;SGALNSNDAFVLK;SGALNSNDAFVLKTPSAAYLWVGAGASEAEK;SGALNSNDAFVLKTPSAAYLWVGAGASEAEKTGAQELLK;TPSAAYLWVGAGASEAEKTGAQELLK	10090	8	8	5	13.5	85.941	123320000	2223000	17407000	5775700	14133000	14529000	5354100	8101500	8596200	8947900	3859700	14132000	20256000	1245100	4242200	3248700	2979700	5251100	1855600	2892300	2615100	3501300	1928100	3006200	4810500
P48637	Glutathione synthetase	GSS	sp|P48637|GSHB_HUMAN Glutathione synthetase OS=Homo sapiens OX=9606 GN=GSS PE=1 SV=1	Homo sapiens	EGGGNNLYGEEMVQALKQLK	9606	1	1	1	4.2	52.384	15359000	3249200	4948900	7161400	0	0	0	0	0	0	0	0	0	3249200	2053000	7654400	0	0	0	0	0	0	0	0	0
P10649	Glutathione S-transferase Mu 1	Gstm1	sp|P10649|GSTM1_MOUSE Glutathione S-transferase Mu 1 OS=Mus musculus OX=10090 GN=Gstm1 PE=1 SV=2;sp|Q8R5I6|GSTM4_MOUSE Glutathione S-transferase Mu 4 OS=Mus musculus OX=10090 GN=Gstm4 PE=1 SV=1;sp|Q80W21|GSTM7_MOUSE Glutathione S-transferase Mu 7 OS=Mus mu	Mus musculus	FKLGLDFPNLPYLIDGSHK;FKLGLDFPNLPYLIDGSHKITQSNAILR;ITQSNAILR;LGLDFPNLPYLIDGSHKITQSNAILR;YLARKHHLDGETEEER	10090	5	5	1	20.2	25.97	80144000	947660	16675000	1784300	558690	6175200	11212000	0	15132000	1608800	3223600	20056000	2771000	869590	4727900	3744800	889960	2440000	6795300	0	8023100	1935200	3098800	2843800	1110800
P19157	Glutathione S-transferase P 1	Gstp1	sp|P19157|GSTP1_MOUSE Glutathione S-transferase P 1 OS=Mus musculus OX=10090 GN=Gstp1 PE=1 SV=2;sp|P46425|GSTP2_MOUSE Glutathione S-transferase P 2 OS=Mus musculus OX=10090 GN=Gstp2 PE=1 SV=2	Mus musculus	AFLSSPEHVNRPINGNGKQ;ALPGHLKPFETLLSQNQGGK;FEDGDLTLYQSNAILR;PPYTIVYFPVR;PPYTIVYFPVRGR	10090	5	5	5	32.4	23.609	193310000	8787400	11073000	7932800	16154000	3895900	52979000	14756000	14658000	19400000	6048400	17869000	19755000	2657000	4280200	7184800	5242400	3636400	7648900	6733700	6193100	9604000	3580600	5512100	5667800
P78347	General transcription factor II-I	GTF2I	sp|P78347|GTF2I_HUMAN General transcription factor II-I OS=Homo sapiens OX=9606 GN=GTF2I PE=1 SV=2	Homo sapiens	FAQALGLTEAVK;MVVTFLMSALESMCK	9606	2	2	0	2.7	112.42	88456000	7028200	6844100	3796300	5549800	0	6204300	14392000	13661000	7377900	4608500	11772000	7222500	6254000	5203700	4752000	5463700	0	4460100	7420400	6861200	4978200	4699100	7108900	4579300
P46976	Glycogenin-1	GYG1	sp|P46976|GLYG_HUMAN Glycogenin-1 OS=Homo sapiens OX=9606 GN=GYG1 PE=1 SV=4	Homo sapiens	TDQAFVTLTTNDAYAK	9606	1	1	0	4.6	39.383	9021900	901880	528870	661480	0	831490	707050	0	774990	791200	1082100	1642900	1099900	923070	383620	723630	0	568990	416940	0	472850	489730	953630	799740	587290
Q78HU7	Glycophorin-C	Gypc	sp|Q78HU7|GLPC_MOUSE Glycophorin-C OS=Mus musculus OX=10090 GN=Gypc PE=1 SV=2	Mus musculus	GTEFAESADAALQSDPALQDAGDTSKKEYFI	10090	1	1	1	32.6	10.329	9449100	0	1072100	1290300	0	0	1295700	0	330250	2040300	0	3420400	0	0	832870	1170000	0	0	815710	0	279600	1112400	0	2015400	0
P07305	Histone H1.0	H1F0	sp|P07305|H10_HUMAN Histone H1.0 OS=Homo sapiens OX=9606 GN=H1-0 PE=1 SV=3	Homo sapiens	TENSTSAPAAKPK;VGENADSQIK	9606	2	2	0	11.9	20.863	478050000	31276000	38066000	26449000	1713500	58968000	7020300	73674000	21647000	115200000	38358000	30388000	35293000	29239000	31184000	18010000	1908300	38861000	4660700	58362000	15446000	44311000	28143000	15304000	17213000
P14483	H-2 class II histocompatibility antigen, A beta chain	H2-Ab1	sp|P14483|HB2A_MOUSE H-2 class II histocompatibility antigen, A beta chain OS=Mus musculus OX=10090 GN=H2-Ab1 PE=1 SV=1;sp|P06342|HB2Q_MOUSE H-2 class II histocompatibility antigen, A-Q beta chain OS=Mus musculus OX=10090 GN=H2-Ab1 PE=1 SV=1;sp|P01921|HB2D	Mus musculus	AVTELGRPDAEYWNSQPEILER;EEYVRYDSDVGEHRAVTELGRPDAEYWNSQPEILER	10090	2	2	2	13.6	30.128	5563400	412790	1073800	933240	717280	0	0	1400200	0	0	0	0	1026100	476310	647750	0	617270	0	0	1083600	0	0	0	0	542410
Q9BTM1	Histone H2A.J	H2AFJ	sp|Q9BTM1|H2AJ_HUMAN Histone H2A.J OS=Homo sapiens OX=9606 GN=H2AJ PE=1 SV=1;sp|Q99878|H2A1J_HUMAN Histone H2A type 1-J OS=Homo sapiens OX=9606 GN=H2AC14 PE=1 SV=3;sp|Q96KK5|H2A1H_HUMAN Histone H2A type 1-H OS=Homo sapiens OX=9606 GN=H2AC12 PE=1 SV=3;sp|P0	Homo sapiens	AGLQFPVGR;AGLQFPVGRVHR;HLQLAIRNDEELNKLLGK;LLGKVTIAQGGVLPNIQAVLLPK;LLRKGNYAER;NDEELNKLLGK;NDEELNKLLGKVTIAQGGVLPNIQAVLLPK;SRSSRAGLQFPVGR;SSRAGLQFPVGR;VGAGAPVYLAAVLEYLTAEILELAGNAAR;VGAGAPVYLAAVLEYLTAEILELAGNAARDNKK;VTIAQGGVLPNIQAVLLPK;VTIAQGGVLPNIQAVLLPKK	9606	13	13	0	76	14.019	3550800000	153150000	502260000	130620000	120140000	362070000	362300000	444260000	493060000	284570000	206650000	360790000	130970000	125100000	231340000	89355000	82173000	178420000	123170000	160140000	102980000	129780000	109060000	145060000	122890000
Q9QZQ8	Core histone macro-H2A.1	H2afy	sp|Q9QZQ8|H2AY_MOUSE Core histone macro-H2A.1 OS=Mus musculus OX=10090 GN=Macroh2a1 PE=1 SV=3	Mus musculus	AASADSTTEGTPTDGFTVLSTK;KGGKEFVEAVLELR	10090	2	2	1	9.7	39.735	57439000	0	25463000	0	0	578200	7401000	7401700	0	4231000	4916200	1645900	5801800	0	13529000	0	0	511650	3959100	6256100	0	2478100	3759600	0	2275300
P84244	Histone H3.3	H3f3a	sp|P84244|H33_MOUSE Histone H3.3 OS=Mus musculus OX=10090 GN=H3-3a PE=1 SV=2;sp|P84228|H32_MOUSE Histone H3.2 OS=Mus musculus OX=10090 GN=H3c2 PE=1 SV=2;sp|P68433|H31_MOUSE Histone H3.1 OS=Mus musculus OX=10090 GN=H3c1 PE=1 SV=2;sp|P02301|H3C_MOUSE Histone	Mus musculus	EIAQDFKTDLR;YQKSTELLIR;YRPGTVALR	10090	3	3	0	22.1	15.328	651460000	38436000	23256000	29705000	89117000	119380000	7291300	51924000	53385000	45391000	45291000	15398000	132880000	26982000	11195000	23242000	47408000	73061000	11870000	28599000	20967000	19552000	24446000	20989000	46573000
Q14520	Hyaluronan-binding protein 2	HABP2	sp|Q14520|HABP2_HUMAN Hyaluronan-binding protein 2 OS=Homo sapiens OX=9606 GN=HABP2 PE=1 SV=1	Homo sapiens	MFARMSDLHVLLLMALVGK	9606	1	1	1	3.4	62.671	4213100000	113650000	0	315340000	266190000	907740000	453860000	343260000	207830000	517840000	281930000	359500000	445970000	113650000	0	335290000	256260000	606910000	261490000	235980000	128700000	327210000	242740000	193860000	232660000
P01942	Hemoglobin subunit alpha	Hba	sp|P01942|HBA_MOUSE Hemoglobin subunit alpha OS=Mus musculus OX=10090 GN=Hba PE=1 SV=2	Mus musculus	AAWGKIGGHGAEYGAEALER;FLASVSTVLTSK;FLASVSTVLTSKYR;IGGHGAEYGAEALER;MFASFPTTK;SNIKAAWGK;SNIKAAWGKIGGHGAEYGAEALER;TYFPHFDVSHGSAQVK;TYFPHFDVSHGSAQVKGHGK;TYFPHFDVSHGSAQVKGHGKK;VLSGEDKSNIK;VLSGEDKSNIKAAWGK	10090	12	12	10	52.8	15.085	19504000000	1254400000	2781000000	421180000	610360000	2551800000	1578600000	1253900000	3409300000	2100000000	1017100000	934800000	1591600000	350980000	546370000	319220000	394320000	637110000	584190000	332530000	832420000	567830000	323270000	327600000	336300000
P02088	Hemoglobin subunit beta-1	Hbb-b1	sp|P02088|HBB1_MOUSE Hemoglobin subunit beta-1 OS=Mus musculus OX=10090 GN=Hbb-b1 PE=1 SV=2;sp|P02089|HBB2_MOUSE Hemoglobin subunit beta-2 OS=Mus musculus OX=10090 GN=Hbb-b2 PE=1 SV=2	Mus musculus	DFTPAAQAAFQK;GTFASLSELHCDK;KVITAFNDGLNHLDSLK;LHVDPENFR;LLVVYPWTQR;LLVVYPWTQRYFDSFGDLSSASAIMGNAK;VHLTDAEK;VITAFNDGLNHLDSLK;VITAFNDGLNHLDSLKGTFASLSELHCDK;YFDSFGDLSSASAIMGNAK	10090	10	10	8	59.9	15.84	7061800000	398860000	743890000	326910000	192260000	420330000	615290000	392110000	967770000	812970000	877070000	767250000	547120000	236850000	299870000	134360000	151100000	177650000	202610000	102890000	265070000	217980000	167510000	282550000	174960000
Q99L13	3-hydroxyisobutyrate dehydrogenase, mitochondrial	Hibadh	sp|Q99L13|3HIDH_MOUSE 3-hydroxyisobutyrate dehydrogenase, mitochondrial OS=Mus musculus OX=10090 GN=Hibadh PE=1 SV=1	Mus musculus	DLGLAQDSATSTKTPILLGSLAHQIYR	10090	1	1	1	8.1	35.44	12593000	0	0	0	0	7006500	0	1444200	0	0	1289200	2062500	790760	0	0	0	0	4721700	0	983810	0	0	1069700	1121000	415820
P70349	Histidine triad nucleotide-binding protein 1	Hint1	sp|P70349|HINT1_MOUSE Histidine triad nucleotide-binding protein 1 OS=Mus musculus OX=10090 GN=Hint1 PE=1 SV=3	Mus musculus	ADEIAK;ADEIAKAQVAQPGGDTIFGK;AQVAQPGGDTIFGK	10090	3	3	2	15.9	13.777	30509000	1228400	3465300	942640	2250300	2301400	1184400	3415200	1703700	2898500	3132000	5044300	2943100	720900	1723300	570300	775820	910860	729130	2508800	609580	736140	3039200	1152400	866140
P43276	Histone H1.5	Hist1h1b	sp|P43276|H15_MOUSE Histone H1.5 OS=Mus musculus OX=10090 GN=H1-5 PE=1 SV=2	Mus musculus	ALAAGGYDVEKNNSR;GTGASGSFKLNK;GTGASGSFKLNKK;SETAPAETAAPAPVEK;SETAPAETAAPAPVEKSPAK;SETAPAETAAPAPVEKSPAKK;SLVSKGTLVQTK	10090	7	4	3	27.4	22.576	807580000	39597000	75892000	114010000	36575000	25694000	56777000	97425000	11755000	205900000	15690000	20072000	108190000	20319000	44332000	78405000	17053000	14105000	28769000	37290000	8439500	89453000	12033000	5342000	34231000
P15864	Histone H1.2	Hist1h1c	sp|P15864|H12_MOUSE Histone H1.2 OS=Mus musculus OX=10090 GN=H1-2 PE=1 SV=2	Mus musculus	ALAAAGYDVEK;ALAAAGYDVEKNNSR;GTGASGSFKLNK;GTGASGSFKLNKK;KALAAAGYDVEKNNSR;KASGPPVSELITK;SEAAPAAPAAAPPAEK;SEAAPAAPAAAPPAEKAPAK;SEAAPAAPAAAPPAEKAPAKK;SGVSLAALKK;SGVSLAALKKALAAAGYDVEK	10090	11	3	3	34	21.266	6289800000	205200000	1133900000	513040000	74500000	566990000	1135600000	494090000	511680000	1264900000	81308000	126910000	181760000	43844000	337860000	275770000	160160000	313860000	335820000	871890000	435200000	542120000	44662000	142470000	92049000
P43277	Histone H1.3	Hist1h1d	sp|P43277|H13_MOUSE Histone H1.3 OS=Mus musculus OX=10090 GN=H1-3 PE=1 SV=2	Mus musculus	ALAAAGYDVEK;ALAAAGYDVEKNNSR;GTGASGSFKLNK;GTGASGSFKLNKK;KALAAAGYDVEKNNSR;KASGPPVSELITK;SETAPAAPAAPAPVEK;SETAPAAPAAPAPVEKTPVK;SETAPAAPAAPAPVEKTPVKK;SGVSLAALKK;SGVSLAALKKALAAAGYDVEK;SLVSKGTLVQTK	10090	12	3	3	38	22.099	1601400000	63625000	389210000	70478000	84657000	95937000	328490000	32124000	303920000	97934000	87681000	32539000	14851000	84774000	73803000	44179000	23559000	67925000	113010000	59498000	92316000	54862000	56496000	216340000	67947000
P10412	Histone H1.4	HIST1H1E	sp|P10412|H14_HUMAN Histone H1.4 OS=Homo sapiens OX=9606 GN=H1-4 PE=1 SV=2;sp|P16403|H12_HUMAN Histone H1.2 OS=Homo sapiens OX=9606 GN=H1-2 PE=1 SV=2;sp|P16402|H13_HUMAN Histone H1.3 OS=Homo sapiens OX=9606 GN=H1-3 PE=1 SV=2;sp|Q02539|H11_HUMAN Histone H1.	Homo sapiens	ALAAAGYDVEK;ALAAAGYDVEKNNSR;GTGASGSFKLNK;GTGASGSFKLNKK;KALAAAGYDVEKNNSR;KASGPPVSELITK;SETAPAAPAAPAPAEK;SETAPAAPAAPAPAEKTPVK;SETAPAAPAAPAPAEKTPVKK;SGVSLAALKK;SGVSLAALKKALAAAGYDVEK;SLVSKGTLVQTK	9606	12	12	0	38.4	21.865	1852400000	65042000	414530000	152810000	18467000	127780000	238300000	80888000	171120000	247560000	21501000	172140000	142250000	30322000	98834000	71002000	10271000	47953000	41740000	29181000	97036000	66239000	14736000	48090000	47312000
Q93079	Histone H2B type 1-H	HIST1H2BH	sp|Q93079|H2B1H_HUMAN Histone H2B type 1-H OS=Homo sapiens OX=9606 GN=H2BC9 PE=1 SV=3;sp|Q5QNW6|H2B2F_HUMAN Histone H2B type 2-F OS=Homo sapiens OX=9606 GN=H2BC18 PE=1 SV=3;sp|Q99879|H2B1M_HUMAN Histone H2B type 1-M OS=Homo sapiens OX=9606 GN=H2BC14 PE=1 S	Homo sapiens	AMGIMNSFVNDIFER;EIQTAVRLLLPGELAK;ESYSVYVYKVLK;ESYSVYVYKVLKQVHPDTGISSK;HAVSEGTKAVTKYTSSK;KESYSVYVYK;KESYSVYVYKVLK;LAHYNKRSTITSR;PDPAKSAPAPK;QVHPDTGISSK;SRKESYSVYVYK;STITSREIQTAVRLLLPGELAK;VLKQVHPDTGISSK	9606	13	1	0	77.8	13.892	11163000	0	0	0	0	0	1604100	2999300	5271700	672110	0	356250	259400	0	0	0	0	0	747530	2310300	3336500	343500	0	155380	109460
Q8CGP1	Histone H2B type 1-K	Hist1h2bk	sp|Q8CGP1|H2B1K_MOUSE Histone H2B type 1-K OS=Mus musculus OX=10090 GN=H2bc12 PE=1 SV=3	Mus musculus	AMGIMNSFVNDIFER;EIQTAVRLLLPGELAK;ESYSVYVYKVLK;ESYSVYVYKVLKQVHPDTGISSK;HAVSEGTKAVTKYTSAK;IASEASRLAHYNKR;KESYSVYVYK;KESYSVYVYKVLK;LAHYNKRSTITSR;QVHPDTGISSK;SRKESYSVYVYK;STITSREIQTAVRLLLPGELAK;VLKQVHPDTGISSK	10090	13	1	0	74.6	13.92	61270000	5110900	2401900	0	0	1732900	36500000	0	0	9314900	0	0	6209200	3256600	1431100	0	0	1069900	22577000	0	0	6319000	0	0	3477800
Q8CGP2	Histone H2B type 1-P	Hist1h2bp	sp|Q8CGP2|H2B1P_MOUSE Histone H2B type 1-P OS=Mus musculus OX=10090 GN=Hist1h2bp PE=1 SV=3;sp|Q64475|H2B1B_MOUSE Histone H2B type 1-B OS=Mus musculus OX=10090 GN=H2bc3 PE=1 SV=3;sp|P10853|H2B1F_MOUSE Histone H2B type 1-F/J/L OS=Mus musculus OX=10090 GN=H2b	Mus musculus	AMGIMNSFVNDIFER;EIQTAVRLLLPGELAK;ESYSVYVYKVLK;ESYSVYVYKVLKQVHPDTGISSK;HAVSEGTKAVTKYTSSK;IASEASRLAHYNKR;KESYSVYVYK;KESYSVYVYKVLK;LAHYNKRSTITSR;QVHPDTGISSK;SRKESYSVYVYK;STITSREIQTAVRLLLPGELAK;VLKQVHPDTGISSK	10090	13	13	0	74.6	13.992	10209000000	290040000	812500000	600240000	476350000	730340000	845460000	1297900000	923660000	979250000	1373000000	1110400000	770310000	191300000	260980000	368380000	239880000	227120000	301440000	321930000	328080000	195290000	337790000	281730000	226130000
P62805	Histone H4	HIST1H4A	sp|P62805|H4_HUMAN Histone H4 OS=Homo sapiens OX=9606 GN=H4C1 PE=1 SV=2	Homo sapiens	DAVTYTEHAK;DAVTYTEHAKRK;DNIQGITKPAIR;DNIQGITKPAIRR;DNIQGITKPAIRRLAR;GVLKVFLENVIR;ISGLIYEETR;QGRTLYGFGG;TLYGFGG;TVTAMDVVYALKR;VFLENVIRDAVTYTEHAK;VLRDNIQGITKPAIR	9606	12	12	0	73.8	11.367	5141000000	275200000	556430000	261440000	265240000	797690000	297080000	709430000	364210000	503320000	447800000	321610000	341580000	143850000	165380000	65869000	147490000	322400000	45903000	189860000	115540000	99190000	62118000	85151000	120290000
Q64524	Histone H2B type 2-E	Hist2h2be	sp|Q64524|H2B2E_MOUSE Histone H2B type 2-E OS=Mus musculus OX=10090 GN=H2bc21 PE=1 SV=3	Mus musculus	AMGIMNSFVNDIFER;EIQTSVRLLLPGELAK;HAVSEGTKAVTKYTSAK;LAHYNKRSTITSR;QVHPDTGISSK;VLKQVHPDTGISSK	10090	6	1	1	59.5	13.993	3335400	0	328460	0	0	498450	0	759350	0	0	0	960300	788800	0	287860	0	0	343880	0	430400	0	0	0	573900	382130
Q7L7L0	Histone H2A type 3	HIST3H2A	sp|Q7L7L0|H2A3_HUMAN Histone H2A type 3 OS=Homo sapiens OX=9606 GN=H2AW PE=1 SV=3;sp|P04908|H2A1B_HUMAN Histone H2A type 1-B/E OS=Homo sapiens OX=9606 GN=H2AC4 PE=1 SV=2;sp|P16104|H2AX_HUMAN Histone H2AX OS=Homo sapiens OX=9606 GN=H2AX PE=1 SV=2	Homo sapiens	AGLQFPVGR;AGLQFPVGRVHR;HLQLAIRNDEELNKLLGR;KGNYSER;NDEELNKLLGR;NDEELNKLLGRVTIAQGGVLPNIQAVLLPK;SRSSRAGLQFPVGR;SSRAGLQFPVGR;VGAGAPVYLAAVLEYLTAEILELAGNAAR;VGAGAPVYLAAVLEYLTAEILELAGNAARDNKK;VTIAQGGVLPNIQAVLLPK;VTIAQGGVLPNIQAVLLPKK	9606	12	4	0	73.1	14.121	827910000	22510000	40927000	9267800	12953000	126680000	164830000	32899000	49114000	119480000	77057000	32841000	139350000	9281700	20498000	10080000	11487000	65882000	83333000	14534000	21966000	51445000	63844000	13651000	62214000
Q9D2U9	Histone H2B type 3-A	Hist3h2ba	sp|Q9D2U9|H2B3A_MOUSE Histone H2B type 3-A OS=Mus musculus OX=10090 GN=Hist3h2ba PE=1 SV=3;sp|Q8CGP0|H2B3B_MOUSE Histone H2B type 3-B OS=Mus musculus OX=10090 GN=H2bu1 PE=1 SV=3	Mus musculus	AMGIMNSFVNDIFER;EVQTAVRLLLPGELAK;HAVSEGTKAVTKYTSSK;IASEASRLAHYNKR;LAHYNKRSTITSR;QVHPDTGISSK;VLKQVHPDTGISSK	10090	7	1	0	65.1	13.994	4814300	439240	0	409000	0	0	0	1018500	808640	914040	0	1224800	0	433900	0	432520	0	0	0	748600	473510	520770	0	706100	0
P17710	Hexokinase-1	Hk1	sp|P17710|HXK1_MOUSE Hexokinase-1 OS=Mus musculus OX=10090 GN=Hk1 PE=1 SV=3	Mus musculus	GKFTTSDVAAIETDKEGVQNAK;HIDLVEGDEGR	10090	2	2	1	3.4	108.3	47575000	309950	4620300	624590	6530700	6321500	19730000	3139600	1427300	2037800	501190	1057000	1274600	0	2461000	0	4016700	5093600	13700000	1796100	1065100	1219200	0	661650	742760
P18608	Non-histone chromosomal protein HMG-14	Hmgn1	sp|P18608|HMGN1_MOUSE Non-histone chromosomal protein HMG-14 OS=Mus musculus OX=10090 GN=Hmgn1 PE=1 SV=2	Mus musculus	GKQADVADQQTTELPAENGETENQSPASEEEK	10090	1	1	1	33.3	10.152	19027000	0	0	5644600	0	0	0	5472800	0	1526100	0	0	6383500	0	0	4459500	0	0	0	4534500	0	1782900	0	0	3313300
P41235	Hepatocyte nuclear factor 4-alpha	HNF4A	sp|P41235|HNF4A_HUMAN Hepatocyte nuclear factor 4-alpha OS=Homo sapiens OX=9606 GN=HNF4A PE=1 SV=3	Homo sapiens	KIASIADVCESMK	9606	1	1	1	2.7	52.784	28163000	0	8811700	432510	2972700	4602000	8801300	2542600	0	0	0	0	0	0	0	0	0	0	0	0	0	0	0	0	0
O88569	Heterogeneous nuclear ribonucleoproteins A2/B1	Hnrnpa2b1	sp|O88569|ROA2_MOUSE Heterogeneous nuclear ribonucleoproteins A2/B1 OS=Mus musculus OX=10090 GN=Hnrnpa2b1 PE=1 SV=2	Mus musculus	LFIGGLSFETTEESLR;YHTINGHNAEVR	10090	2	2	0	7.9	37.402	11621000	1205000	0	460790	0	1522800	697470	4238000	0	1068500	0	1275700	1153100	1203900	0	491410	0	501110	632470	2369300	0	818230	0	730120	757630
Q99020	Heterogeneous nuclear ribonucleoprotein A/B	Hnrnpab	sp|Q99020|ROAA_MOUSE Heterogeneous nuclear ribonucleoprotein A/B OS=Mus musculus OX=10090 GN=Hnrnpab PE=1 SV=1	Mus musculus	IFVGGLNPEATEEK	10090	1	1	1	4.9	30.831	8959700	678500	0	613180	244540	1617400	910760	0	0	2230400	737110	0	1927800	688850	0	665380	236920	1097900	532730	0	0	1430800	552470	0	1021100
Q14103	Heterogeneous nuclear ribonucleoprotein D0	HNRNPD	sp|Q14103|HNRPD_HUMAN Heterogeneous nuclear ribonucleoprotein D0 OS=Homo sapiens OX=9606 GN=HNRNPD PE=1 SV=1	Homo sapiens	FGEVVDCTLKLDPITGR;IFVGGLSPDTPEEK	9606	2	2	0	8.7	38.434	28854000	1390100	4978400	938090	0	4453100	1991500	3870900	0	3180100	995620	2654800	4401300	1768100	1433100	1275300	0	1052000	1459400	1580300	0	1494300	1108100	1820900	1262200
P52597	Heterogeneous nuclear ribonucleoprotein F	HNRNPF	sp|P52597|HNRPF_HUMAN Heterogeneous nuclear ribonucleoprotein F OS=Homo sapiens OX=9606 GN=HNRNPF PE=1 SV=3	Homo sapiens	ITGEAFVQFASQELAEK	9606	1	1	0	4.1	45.671	3681000	0	432870	426650	196100	1175500	0	0	0	605490	0	0	844370	0	282790	379810	196610	831930	0	0	0	404970	0	0	466280
P70333	Heterogeneous nuclear ribonucleoprotein H2	Hnrnph2	sp|P70333|HNRH2_MOUSE Heterogeneous nuclear ribonucleoprotein H2 OS=Mus musculus OX=10090 GN=Hnrnph2 PE=1 SV=1;sp|O35737|HNRH1_MOUSE Heterogeneous nuclear ribonucleoprotein H OS=Mus musculus OX=10090 GN=Hnrnph1 PE=1 SV=3	Mus musculus	STGEAFVQFASQEIAEK	10090	1	1	0	3.8	49.279	26928000	830530	4096500	1317100	0	2478200	2821500	2820600	1866900	2394300	1054500	3606200	3641600	879660	2931300	1416900	0	1667700	1636200	1869200	1163500	1522700	913860	1957300	1835500
P61978	Heterogeneous nuclear ribonucleoprotein K	HNRNPK	sp|P61978|HNRPK_HUMAN Heterogeneous nuclear ribonucleoprotein K OS=Homo sapiens OX=9606 GN=HNRNPK PE=1 SV=1	Homo sapiens	DLAGSIIGKGGQR;TDYNASVSVPDSSGPER	9606	2	2	0	6.5	50.976	9270200	712130	0	540960	707640	215250	685710	934770	687670	2550100	539700	659910	1036400	949730	0	555540	604220	277160	459210	585680	476750	740120	403950	435830	537220
Q9D0E1	Heterogeneous nuclear ribonucleoprotein M	Hnrnpm	sp|Q9D0E1|HNRPM_MOUSE Heterogeneous nuclear ribonucleoprotein M OS=Mus musculus OX=10090 GN=Hnrnpm PE=1 SV=3	Mus musculus	AAGVEAAAEVAATEPK;QGGGGAGGSVPGIER	10090	2	2	2	4.3	77.648	15271000	1339200	1043900	0	0	1205300	0	239360	1187300	1077900	2164200	2358800	4654600	1318200	461350	0	0	672680	0	424510	454630	568550	1735900	1061800	1749700
O43390	Heterogeneous nuclear ribonucleoprotein R	HNRNPR	sp|O43390|HNRPR_HUMAN Heterogeneous nuclear ribonucleoprotein R OS=Homo sapiens OX=9606 GN=HNRNPR PE=1 SV=1	Homo sapiens	DLYEDELVPLFEK;TGYTLDVTTGQR;YGGPPPDSVYSGVQPGIGTEVFVGKIPR	9606	3	3	2	8.4	70.942	51655000	7098500	4327400	2467100	2073300	1431700	8843100	2221200	1424200	5776200	6145100	4142500	5705000	1901200	2550500	1920300	2025400	1552600	2542500	1298000	606940	1804600	2244300	1151600	1458400
Q8VEK3	Heterogeneous nuclear ribonucleoprotein U	Hnrnpu	sp|Q8VEK3|HNRPU_MOUSE Heterogeneous nuclear ribonucleoprotein U OS=Mus musculus OX=10090 GN=Hnrnpu PE=1 SV=1	Mus musculus	EKPYFPIPEDCTFIQNVPLEDR	10090	1	1	1	2.8	87.917	113660000	2539200	20172000	10949000	11071000	4311900	26857000	2794200	3032600	13489000	3012200	5680100	9757200	2539200	14341000	11703000	10701000	2882900	15473000	1920900	1877900	8523100	2593500	3063000	5090400
Q91X72	Hemopexin	Hpx	sp|Q91X72|HEMO_MOUSE Hemopexin OS=Mus musculus OX=10090 GN=Hpx PE=1 SV=2	Mus musculus	ELGSPPGISLETIDAAFSCPGSSR;SLPQPQKVNSILGCSQ	10090	2	2	2	8.7	51.317	50250000	3799500	2432500	2611600	4103800	3366600	6305300	4802700	3870100	4569000	5226900	2704200	6457700	3805000	1731800	2795400	3972200	2254100	3142500	3306500	2081400	2506700	4506900	1460300	2856200
P07900	Heat shock protein HSP 90-alpha	HSP90AA1	sp|P07900|HS90A_HUMAN Heat shock protein HSP 90-alpha OS=Homo sapiens OX=9606 GN=HSP90AA1 PE=1 SV=5	Homo sapiens	EGLELPEDEEEK;GVVDSEDLPLNISR;HLEINPDHSIIETLR;YIDQEELNK	9606	4	1	0	6.8	84.659	12547000	845640	0	340480	1129200	1487900	1156600	3486500	1329000	1082200	996270	0	693210	736700	0	391430	892040	832160	763620	2746700	721830	628220	982980	0	389600
P08238	Heat shock protein HSP 90-beta	HSP90AB1	sp|P08238|HS90B_HUMAN Heat shock protein HSP 90-beta OS=Homo sapiens OX=9606 GN=HSP90AB1 PE=1 SV=4	Homo sapiens	EGLELPEDEEEK;ELISNASDALDK;ELISNASDALDKIR;EQVANSAFVER;GVVDSEDLPLNISR;HLEINPDHPIVETLR;NPDDITQEEYGEFYK;YESLTDPSKLDSGKELK;YIDQEELNK	9606	9	7	0	14.8	83.263	111270000	4476200	7063200	6857700	7368500	2970800	27377000	14947000	6031500	7860400	10675000	8852700	6784400	2848500	2084800	2717000	4919800	1000700	6804100	3965100	3279400	2145400	2902200	2544900	2112000
P08113	Endoplasmin	Hsp90b1	sp|P08113|ENPL_MOUSE Endoplasmin OS=Mus musculus OX=10090 GN=Hsp90b1 PE=1 SV=2	Mus musculus	EEEAIQLDGLNASQIR;EELVKNLGTIAK;EGSRTDDEVVQR;EGSRTDDEVVQREEEAIQLDGLNASQIR;ELISNASDALDK;ELISNASDALDKIR;FQSSHHSTDITSLDQYVER;GVVDSDDLPLNVSR;TETVEEPLEEDEAAK;YLNFVKGVVDSDDLPLNVSR	10090	10	10	2	13.5	92.475	290080000	12664000	15491000	13950000	8923900	16243000	66740000	29335000	40776000	26776000	18104000	26643000	14438000	4546100	3581700	6609700	3880800	5254400	8915100	6292700	6898500	5264100	5433300	5960200	4023000
P16627	Heat shock 70 kDa protein 1-like	Hspa1l	sp|P16627|HS71L_MOUSE Heat shock 70 kDa protein 1-like OS=Mus musculus OX=10090 GN=Hspa1l PE=1 SV=4	Mus musculus	IINEPTAAAIAYGLDK;ITITNDKGR;NQVAMNPQNTVFDAK;NQVAMNPQNTVFDAKR;TTPSYVAFTDTER;TTPSYVAFTDTERLIGDAAK	10090	6	2	0	9.5	70.636	71317000	4956900	17514000	1306300	5294000	3422500	5102300	25795000	1948700	5157300	0	0	819490	4942400	4562400	6012300	5373800	8357300	3707500	4405200	2438600	4975800	0	0	2731300
P34932	Heat shock 70 kDa protein 4	HSPA4	sp|P34932|HSP74_HUMAN Heat shock 70 kDa protein 4 OS=Homo sapiens OX=9606 GN=HSPA4 PE=1 SV=4	Homo sapiens	EFSITDVVPYPISLR	9606	1	1	0	1.8	94.33	9491900	581280	1118600	0	0	1539500	905350	738870	0	1313100	869340	937160	1488700	602360	773990	0	0	1032000	522990	540760	0	800710	737400	506690	778710
P20029	78 kDa glucose-regulated protein	Hspa5	sp|P20029|BIP_MOUSE Endoplasmic reticulum chaperone BiP OS=Mus musculus OX=10090 GN=Hspa5 PE=1 SV=3	Mus musculus	ELEEIVQPIISK;ELEEIVQPIISKLYGSGGPPPTGEEDTSEK;ELEEIVQPIISKLYGSGGPPPTGEEDTSEKDEL;IDTRNELESYAYSLKNQIGDK;IEWLESHQDADIEDFKAK;IINEPTAAAIAYGLDK;IINEPTAAAIAYGLDKR;IQQLVKEFFNGKEPSR;ITITNDQNRLTPEEIER;ITPSYVAFTPEGER;LIGDAAKNQLTSNPENTVFDAK;LIGDAAKNQLTSNPENTVFDAKR;LYGSGGPPPTGEEDTSEKDEL;NELESYAYSLKNQIGDKEK;NQLTSNPENTVFDAK;NQLTSNPENTVFDAKR;SQIFSTASDNQPTVTIK;TFAPEEISAMVLTK;TKPYIQVDIGGGQTK;TWNDPSVQQDIK;VEIIANDQGNR…	10090	24	24	3	42.7	72.421	1060900000	40704000	68003000	42732000	66874000	125090000	150040000	76156000	81112000	98736000	51354000	169910000	90170000	14198000	15469000	15608000	12683000	20049000	18994000	13526000	14500000	18031000	14770000	17564000	14712000
P17066	Heat shock 70 kDa protein 6	HSPA6	sp|P17066|HSP76_HUMAN Heat shock 70 kDa protein 6 OS=Homo sapiens OX=9606 GN=HSPA6 PE=1 SV=2;sp|P48741|HSP77_HUMAN Putative heat shock 70 kDa protein 7 OS=Homo sapiens OX=9606 GN=HSPA7 PE=5 SV=2	Homo sapiens	IINEPTAAAIAYGLDR;ITITNDKGR;LLQDFFNGKELNK;TTPSYVAFTDTER;VEILANDQGNR;VEILANDQGNRTTPSYVAFTDTER	9606	6	3	2	9.6	71.027	65083000	6201600	10780000	2852100	6984800	10445000	0	3755800	0	3156500	2855900	6570200	11481000	6059800	5758400	2212500	6596800	4743300	0	2523000	0	1948900	3504500	2222600	5853000
P11142	Heat shock cognate 71 kDa protein	HSPA8	sp|P11142|HSP7C_HUMAN Heat shock cognate 71 kDa protein OS=Homo sapiens OX=9606 GN=HSPA8 PE=1 SV=1	Homo sapiens	ARFEELNADLFR;ARFEELNADLFRGTLDPVEK;DAGTIAGLNVLR;DAKLDKSQIHDIVLVGGSTR;FEELNADLFR;FEELNADLFRGTLDPVEK;IINEPTAAAIAYGLDK;IINEPTAAAIAYGLDKK;IQKLLQDFFNGKELNK;ITITNDKGR;LDKSQIHDIVLVGGSTR;LLQDFFNGKELNK;NTTIPTKQTQTFTTYSDNQPGVLIQVYEGER;QATKDAGTIAGLNVLR;QTQTFTTYSDNQPGVLIQVYEGER;SFYPEEVSSMVLTK;SINPDEAVAYGAAVQAAILSGDK;SKGPAVGIDLGTTYSCVGVFQHGK;STAGDTHLGGEDFDNR;TTPSYVAFTDTER;TTPSYVAFTDTERLIGDAAK;TVTNAVVTVPAYFNDSQ…	9606	23	22	0	39.3	70.897	1611700000	83582000	82157000	55119000	82820000	152900000	158330000	192610000	198790000	156110000	103020000	207000000	139280000	15951000	18299000	17944000	21042000	20297000	22177000	31131000	20261000	18694000	17376000	22641000	20969000
P38647	Stress-70 protein, mitochondrial	Hspa9	sp|P38647|GRP75_MOUSE Stress-70 protein, mitochondrial OS=Mus musculus OX=10090 GN=Hspa9 PE=1 SV=3	Mus musculus	ALLAGKDSETGENIR;AQFEGIVTDLIK;AQFEGIVTDLIKR;DAGQISGLNVLR;NAVITVPAYFNDSQR;QATKDAGQISGLNVLR;QAVTNPNNTFYATK;STNGDTFLGGEDFDQALLR;TTPSVVAFTADGER;VINEPTAAALAYGLDK;VQQTVQDLFGR	10090	11	11	3	19.6	73.46	286800000	19839000	28927000	9563900	11858000	35777000	21474000	31771000	24773000	20039000	26345000	32681000	23752000	4940600	4381000	2493700	2917200	4760800	3141300	5013900	4469600	4029600	4731800	4126800	4575600
P14602	Heat shock protein beta-1	Hspb1	sp|P14602|HSPB1_MOUSE Heat shock protein beta-1 OS=Mus musculus OX=10090 GN=Hspb1 PE=1 SV=3	Mus musculus	AQIGGPEAGKSEQSGAK;AVTQSAEITIPVTFEAR;EGVVEITGKHEER;KYTLPPGVDPTLVSSSLSPEGTLTVEAPLPK;QLSSGVSEIR	10090	5	5	4	42.1	23.014	156910000	10872000	13121000	11447000	9638700	13226000	20792000	13644000	3542800	24691000	6862600	11520000	17551000	3731900	12361000	4880300	5276900	2715600	11154000	3922800	1928200	7132800	7222000	3092900	5702500
P10809	60 kDa heat shock protein, mitochondrial	HSPD1	sp|P10809|CH60_HUMAN 60 kDa heat shock protein, mitochondrial OS=Homo sapiens OX=9606 GN=HSPD1 PE=1 SV=2	Homo sapiens	AAVEEGIVLGGGCALLR;DRVTDALNATR;LVQDVANNTNEEAGDGTTTATVLAR;NAGVEGSLIVEK	9606	4	4	0	11.3	61.054	94666000	4756400	8288300	4752800	2828800	8264600	10699000	4882300	6497500	7656000	11124000	10275000	14642000	2535800	2633000	2568500	1469300	3758800	2998700	2201100	3413000	3386600	7091700	2704500	5188600
Q64433	10 kDa heat shock protein, mitochondrial	Hspe1	sp|Q64433|CH10_MOUSE 10 kDa heat shock protein, mitochondrial OS=Mus musculus OX=10090 GN=Hspe1 PE=1 SV=2	Mus musculus	AGQAFRKFLPLFDR;VLQATVVAVGSGGK;VLQATVVAVGSGGKGK	10090	3	3	2	29.4	10.963	110690000	3939200	7569400	5375800	2349100	11767000	18906000	7128300	7994200	9044200	6750800	14313000	15557000	2512900	3584600	4500700	1207100	5290800	4346400	3053100	4285800	5133500	1820700	4210000	4916500
Q05793	Basement membrane-specific heparan sulfate proteoglycan core protein	Hspg2	sp|Q05793|PGBM_MOUSE Basement membrane-specific heparan sulfate proteoglycan core protein OS=Mus musculus OX=10090 GN=Hspg2 PE=1 SV=1	Mus musculus	AGLSSGFVGCVR;ALSSAGQHVAR;ATATACRPCPCPYIDASR;CESCAPGYEGNPIQPGGK;CLCLPGFSGPR;CPIGYSGLSCESCDAHFTR;DYLCDGQEDCR;EDGRPLPSSAQQR;ESLEVQIHPSR;EVSEAVVEKLEPEYR;FSDTCFLDTDGQATCDACAPGYTGRR;GHTPTHPGTLNQR;GQTVTFTCVATGVPTPIINWR;GSLGTSGETCR;HQTHGSLLR;IAHVELADAGQYR;IASVKPSDAGTYVCQAQNALGTAQK;IEGNTLVIPR;LCNECSDGSFHLSK;LDVEFKPLEPNGILLFSGGK;LPAIEPSDQGQYLCR;LRSPVISIEPPSSTVQQGQDASFK;LSFSNFAHLGQESFYWQLPEIYQGDKVAAYGGK;NIG…	10090	35	35	27	15.4	398.29	733650000	37622000	40049000	36001000	65209000	44717000	99701000	60874000	47253000	66763000	83168000	73126000	79164000	8254900	5978800	7525700	9041000	5937900	8046600	6655700	6575600	7026400	7221000	7263100	7673100
Q9JKR6	Hypoxia up-regulated protein 1	Hyou1	sp|Q9JKR6|HYOU1_MOUSE Hypoxia up-regulated protein 1 OS=Mus musculus OX=10090 GN=Hyou1 PE=1 SV=1	Mus musculus	AANSLEAFIFETQDKLYQPEYQEVSTEEQR	10090	1	1	0	3	111.18	15029000	2526500	1067500	1110600	0	3384100	0	1890800	874950	4175000	0	0	0	2121600	1162800	1250300	0	2007800	0	1521800	982500	2168000	0	0	0
P13597	Intercellular adhesion molecule 1	Icam1	sp|P13597|ICAM1_MOUSE Intercellular adhesion molecule 1 OS=Mus musculus OX=10090 GN=Icam1 PE=1 SV=1	Mus musculus	CVLELADQILETQR;LFCSLEGLFPASEAR	10090	2	2	2	5.4	58.844	15233000	0	2107500	1117400	0	3609900	454620	1510700	747850	1120200	1028200	2067100	1469500	0	731650	1416800	0	1508000	454060	665960	248640	693190	438110	602140	735990
P54071	Isocitrate dehydrogenase [NADP], mitochondrial	Idh2	sp|P54071|IDHP_MOUSE Isocitrate dehydrogenase [NADP], mitochondrial OS=Mus musculus OX=10090 GN=Idh2 PE=1 SV=3	Mus musculus	AGTFKLVFTPK;NILGGTVFREPIICK;TIEAEAAHGTVTR	10090	3	3	1	8.6	50.906	64070000	2654900	0	1782700	4354500	3616100	6809000	10412000	978220	2500700	190350	6081000	24690000	2004400	0	1341800	4865000	938100	1967600	1547200	770160	1151700	389330	1158900	14078000
P50213	Isocitrate dehydrogenase [NAD] subunit alpha, mitochondrial	IDH3A	sp|P50213|IDH3A_HUMAN Isocitrate dehydrogenase [NAD] subunit alpha, mitochondrial OS=Homo sapiens OX=9606 GN=IDH3A PE=1 SV=1	Homo sapiens	APIQWEER;CSDFTEEICR;ENTEGEYSGIEHVIVDGVVQSIK;IAEFAFEYAR;IFDAAKAPIQWEER	9606	5	5	0	15.6	39.591	94184000	4337400	5463800	2770400	3202900	9113900	7619900	8160000	9327400	6041500	3565100	18239000	16343000	3217400	2509100	2315100	2138300	1127300	1723500	2674700	6528400	2099400	2038600	4313700	3186300
P01872	Ig mu chain C region	Ighm	sp|P01872|IGHM_MOUSE Immunoglobulin heavy constant mu OS=Mus musculus OX=10090 GN=Ighm PE=1 SV=2	Mus musculus	DGKLVESGFTTDPVTIENK;GFSPADISVQWLQR;LICEATNFTPKPITVSWLK;LVESGFTTDPVTIENK;SILEGSDEYLVCK;TGGKYLATSQVLLSPK;YLATSQVLLSPK	10090	7	7	7	17.8	49.971	67630000	13728000	1729000	1375800	12276000	3262300	2847800	3617800	3657400	0	19583000	3718900	1832700	4704800	385500	503540	4367600	2036300	1522800	2069400	1289500	0	6137600	1396900	696360
Q14164	Inhibitor of nuclear factor kappa-B kinase subunit epsilon	IKBKE	sp|Q14164|IKKE_HUMAN Inhibitor of nuclear factor kappa-B kinase subunit epsilon OS=Homo sapiens OX=9606 GN=IKBKE PE=1 SV=1	Homo sapiens	KDLLLHMQELCEGMK	9606	1	1	1	2.1	80.461	12718000	0	0	0	0	0	0	0	0	12718000	0	0	0	0	0	0	0	0	0	0	0	0	0	0	0
Q9JKF1	Ras GTPase-activating-like protein IQGAP1	Iqgap1	sp|Q9JKF1|IQGA1_MOUSE Ras GTPase-activating-like protein IQGAP1 OS=Mus musculus OX=10090 GN=Iqgap1 PE=1 SV=2	Mus musculus	FALGISAINEAVDSGDVGR;SAAEEVDGLGVVRPHYGSVLDNER;TLSALRSPDVGLYGVIPECGETYQSDLAEAK	10090	3	3	3	4.5	188.74	98672000	8564100	2087200	10058000	6403500	8565500	10247000	8501800	20420000	3373600	10030000	6122600	4299700	6103800	1519400	7917500	3778300	3844200	4109400	5228000	10868000	2182700	7041500	2947500	2296900
P85094	Isochorismatase domain-containing protein 2A, mitochondrial	Isoc2a	sp|P85094|ISC2A_MOUSE Isochorismatase domain-containing protein 2A OS=Mus musculus OX=10090 GN=Isoc2a PE=1 SV=1	Mus musculus	LLDVPILLTEQYPEGLGPTVPELGAQGIRPVSK	10090	1	1	1	16	22.417	16416000	0	0	2933300	1463700	0	0	0	2852000	5042200	0	1596600	2527700	0	0	3220700	1453300	0	0	0	1814200	2841300	0	997500	1354700
Q3V3R4	Integrin alpha-1	Itga1	sp|Q3V3R4|ITA1_MOUSE Integrin alpha-1 OS=Mus musculus OX=10090 GN=Itga1 PE=1 SV=2	Mus musculus	GGFLACGPLYAYR;SLEDPLGINSGKK;TVVQYSPNLIFSGIEEIQK	10090	3	3	3	3.8	130.81	25900000	1306200	2521800	3178200	1620400	4344100	0	1362700	754110	2793900	759220	3713200	3546300	873860	1174500	2260300	1235300	1303500	0	691020	1095000	1198200	646550	1146500	1259300
Q62469	Integrin alpha-2	Itga2	sp|Q62469|ITA2_MOUSE Integrin alpha-2 OS=Mus musculus OX=10090 GN=Itga2 PE=1 SV=2	Mus musculus	YFFNVADEAALLEK	10090	1	1	1	1.2	128.95	1091400	0	0	0	0	0	0	349190	318710	0	0	423510	0	0	0	0	0	0	0	239110	193450	0	0	233220	0
Q9QUM0	Integrin alpha-IIb	Itga2b	sp|Q9QUM0|ITA2B_MOUSE Integrin alpha-IIb OS=Mus musculus OX=10090 GN=Itga2b PE=1 SV=2	Mus musculus	FGSAIAPLGDLNR;GPQALSTPTLLLTGTQLYGR;NLGFQIFQTFK	10090	3	3	3	4.3	112.68	17681000	0	877710	0	689240	1211600	0	0	0	1175900	995900	10131000	2599700	0	659800	0	853550	834060	0	0	0	467050	1081600	2288500	1286200
Q61739	Integrin alpha-6	Itga6	sp|Q61739|ITA6_MOUSE Integrin alpha-6 OS=Mus musculus OX=10090 GN=Itga6 PE=1 SV=3	Mus musculus	EGNQDKFSYLPIQK;GIVSKDDITFVSGAPR;LIATFPDTLTYSAYR;NSYPDLAVGSLSDSVTIFR;RRVNSLPEVLPILNSNEAK;TGGLYSCDITSR;VNSLPEVLPILNSNEAK;YTQELTLNR	10090	8	8	6	9.5	122.16	179510000	5559300	15708000	12123000	11128000	11617000	14814000	19111000	13893000	18698000	12659000	17535000	26664000	3538200	3927900	4661500	3780800	3480300	2581100	4837100	3527400	4172500	5225700	4180600	6805200
Q61738	Integrin alpha-7	Itga7	sp|Q61738|ITA7_MOUSE Integrin alpha-7 OS=Mus musculus OX=10090 GN=Itga7 PE=1 SV=3	Mus musculus	QRVDQALETR;SEELSFVAGAPR	10090	2	2	2	1.9	129.33	21898000	0	1391000	0	3038000	2148500	0	589520	2618000	0	147760	0	11966000	0	963550	0	1677200	1069500	0	976220	1127900	0	737130	0	2955400
A2ARA8	Integrin alpha-8	Itga8	sp|A2ARA8|ITA8_MOUSE Integrin alpha-8 OS=Mus musculus OX=10090 GN=Itga8 PE=1 SV=1	Mus musculus	FGSSVAHLGDLNQDGYNDIAIGVPFAGKDQR	10090	1	1	1	2.9	117.55	30827000	0	1609500	3232800	1310100	0	0	3857600	4218000	5676200	0	3905000	7018000	0	1144300	3455300	1266200	0	0	2652000	2611900	3586600	0	2105800	3661300
P06756	Integrin alpha-V	ITGAV	sp|P06756|ITAV_HUMAN Integrin alpha-V OS=Homo sapiens OX=9606 GN=ITGAV PE=1 SV=2	Homo sapiens	EQLQPHENGEGNSET	9606	1	1	0	1.4	116.04	10015000	336620	0	0	334080	3317000	0	0	0	767760	0	2915500	2344400	250360	0	0	240150	2199500	0	0	0	360800	0	1699300	1407600
P09055	Integrin beta-1	Itgb1	sp|P09055|ITB1_MOUSE Integrin beta-1 OS=Mus musculus OX=10090 GN=Itgb1 PE=1 SV=1	Mus musculus	DNTNEIYSGKFCECDNFNCDR;DNTNEIYSGKFCECDNFNCDRSNGLICGGNGVCR;EKLPQPVQVDPVTHCK;FCECDNFNCDR;GCQPSDIENPR;GEFFNELVGQQR;GICECGACK;KGCQPSDIENPR;LRPEDITQIQPQQLLLK;LRPEDITQIQPQQLLLKLR;LSENNIQTIFAVTEEFQPVYKELK;NVLSLTDRGEFFNELVGQQR;SGEPQKFTLK;SNGLICGGNGVCR;WDTGENPIYK	10090	15	15	11	19.3	88.231	888500000	61068000	67316000	52201000	34858000	127850000	66438000	124000000	48743000	65230000	44793000	112530000	83471000	25629000	14559000	21906000	15592000	19234000	16008000	14468000	17676000	15833000	12841000	19972000	20713000
O54890	Integrin beta-3	Itgb3	sp|O54890|ITB3_MOUSE Integrin beta-3 OS=Mus musculus OX=10090 GN=Itgb3 PE=1 SV=2	Mus musculus	GSGSSAQITQVSPQR	10090	1	1	1	1.9	86.738	5334000	0	0	0	0	561020	0	1050100	991970	529310	0	904370	1297300	0	0	0	0	456180	0	632850	583770	430760	0	493870	612770
A2A863	Integrin beta-4	Itgb4	sp|A2A863|ITB4_MOUSE Integrin beta-4 OS=Mus musculus OX=10090 GN=Itgb4 PE=1 SV=1	Mus musculus	AVEDIDGTHVCQLAK;CHCNQQSLYTDTTCEINYSAIR;ECDQLRQEVEENLNEVYR;GEVGTYNVHLR;ISGNLDAPEGGFDAILQTAVCTR;LLELQEVDSLLR;RFQVQLSNPK;SQVSPQGLQVR;VAPGYYTVTAEQDAR	10090	9	9	7	7.5	201.65	127180000	578160	6298400	9776800	6074300	12247000	10162000	9207200	20940000	25247000	2196800	6569400	17880000	761800	3363700	2387200	2502800	2653200	3322200	1908400	4861100	8096100	1392700	1629400	3780300
Q61702	Inter-alpha-trypsin inhibitor heavy chain H1	Itih1	sp|Q61702|ITIH1_MOUSE Inter-alpha-trypsin inhibitor heavy chain H1 OS=Mus musculus OX=10090 GN=Itih1 PE=1 SV=2	Mus musculus	FSLAGATNLNGGLLR	10090	1	1	1	1.7	101.07	14981000	1429300	574520	1079100	1282100	2129800	1170000	0	2035900	871630	462500	2187900	1758000	1426300	277640	1214400	1281500	1422300	811720	0	1298200	374370	270680	1235200	1022600
Q63959	Potassium voltage-gated channel subfamily C member 3	Kcnc3	sp|Q63959|KCNC3_MOUSE Potassium voltage-gated channel subfamily C member 3 OS=Mus musculus OX=10090 GN=Kcnc3 PE=1 SV=3	Mus musculus	MLSSVCVWSFRGRQGTGK	10090	1	1	1	2.3	81.945	82037000	7267800	6912200	3280000	3154100	14136000	5482400	5317600	9300000	5151200	4697500	8343900	8994400	6079600	4999100	3298800	3937500	6932900	4008000	4311800	5411800	4068600	4535300	4783600	4885100
Q15058	Kinesin-like protein KIF14	KIF14	sp|Q15058|KIF14_HUMAN Kinesin-like protein KIF14 OS=Homo sapiens OX=9606 GN=KIF14 PE=1 SV=1	Homo sapiens	DMAEMQRVWKEK	9606	1	1	1	0.7	186.49	3106700	834370	0	704180	0	0	0	0	0	0	0	0	1568200	0	0	0	0	0	0	0	0	0	0	0	0
O08677	Kininogen-1	Kng1	sp|O08677|KNG1_MOUSE Kininogen-1 OS=Mus musculus OX=10090 GN=Kng1 PE=1 SV=1	Mus musculus	AYFPCIGCVHAISTDSPDLEPVLK;ENEFFIVTQTCK	10090	2	2	2	5.4	73.101	13161000	944210	0	408560	503720	0	0	516030	8943200	518340	442400	0	884690	1616100	0	789490	880210	0	0	775550	1585100	730460	688650	0	944780
P70168	Importin subunit beta-1	Kpnb1	sp|P70168|IMB1_MOUSE Importin subunit beta-1 OS=Mus musculus OX=10090 GN=Kpnb1 PE=1 SV=2	Mus musculus	AAVENLPTFLVELSR;LAATNALLNSLEFTK;VLANPGNSQVAR	10090	3	3	0	4.8	97.183	29027000	1023300	1859400	2486100	1682600	3738500	3780000	5734900	0	4473200	2290700	1958800	0	1233500	1353400	2720500	827360	1481000	1282500	1903900	0	1705400	1876700	1628800	0
P05784	Keratin, type I cytoskeletal 18	Krt18	sp|P05784|K1C18_MOUSE Keratin, type I cytoskeletal 18 OS=Mus musculus OX=10090 GN=Krt18 PE=1 SV=5;sp|P19001|K1C19_MOUSE Keratin, type I cytoskeletal 19 OS=Mus musculus OX=10090 GN=Krt19 PE=1 SV=1	Mus musculus	IVLQIDNAR;SAEIRDAETTLTELRR	10090	2	2	1	5.9	47.538	9306000	0	0	0	0	0	0	1491400	0	0	6936700	877930	0	0	0	0	0	0	0	657060	0	0	5382100	446480	0
P05787	Keratin, type II cytoskeletal 8	KRT8	sp|P05787|K2C8_HUMAN Keratin, type II cytoskeletal 8 OS=Homo sapiens OX=9606 GN=KRT8 PE=1 SV=7	Homo sapiens	KLLEGEESR;LEGLTDEINFLR;LLEGEESR	9606	3	1	0	4.3	53.704	916480	0	0	0	0	0	0	0	0	0	916480	0	0	0	0	0	0	0	0	0	0	0	0	0	0
P35527	Keratin, type I cytoskeletal 9	KRT9	sp|P35527|K1C9_HUMAN Keratin, type I cytoskeletal 9 OS=Homo sapiens OX=9606 GN=KRT9 PE=1 SV=3	Homo sapiens	GGSGGSYGGGGSGGGYGGGSGSR	9606	1	1	1	3.7	62.064	607810	0	0	0	0	0	607810	0	0	0	0	0	0	0	0	0	0	0	0	0	0	0	0	0	0
P11627	Neural cell adhesion molecule L1	L1cam	sp|P11627|L1CAM_MOUSE Neural cell adhesion molecule L1 OS=Mus musculus OX=10090 GN=L1cam PE=1 SV=1	Mus musculus	AFGAPVPSVQWLDEEGTTVLQDER;HAYYVTVEAAPYWLQKPQSHLYGPGETAR;RLVVFPTDDISLKCEAR;TIIQKEPIDLR	10090	4	4	3	6.4	140.97	62194000	2553500	4350900	1054800	1624200	3269100	3568900	23529000	3537200	1028900	5570400	8011800	4095400	2018600	2262200	1173800	1334000	1969200	1422700	16591000	2280600	676890	1559000	2370300	1233300
Q60675	Laminin subunit alpha-2	Lama2	sp|Q60675|LAMA2_MOUSE Laminin subunit alpha-2 OS=Mus musculus OX=10090 GN=Lama2 PE=1 SV=2	Mus musculus	IGPVTYSLDGCVR;SLGLICDECPIGYTGPR;TPYNILSSPDYVGVTK	10090	3	3	2	1.5	343.81	20922000	429910	2037100	670880	666840	0	3806900	3371000	0	1554200	5831300	0	2553800	685390	1169900	741740	666710	0	1408500	2424800	0	1273500	2262600	0	1309000
P97927	Laminin subunit alpha-4	Lama4	sp|P97927|LAMA4_MOUSE Laminin subunit alpha-4 OS=Mus musculus OX=10090 GN=Lama4 PE=1 SV=2	Mus musculus	AASYFFDGSSYAVVR;ADSSNDEAVADTSR;CAPGYYGNPLLIGSTCK;CICKENYVGPNCER;CLDGYIGDSIR;CVWDLTDDLR;DFNLLEQTETLGVGYGCPEDSLISRR;ELQAKADSSNDEAVADTSRR;FCQPCPCPLPHLANFAESCYR;IPFTDIYIGGAPQEVLQSR;IQINNSENTLR;IYDAVSGIDTQIIYHKDESDNLLNQAR;KIPFTDIYIGGAPQEVLQSR;KIQINNSENTLR;LAALSIEESK;LSDLQESINQALDHVR;SLFPVVLEQLDDYNAK	10090	17	17	14	12.9	201.82	374000000	10441000	27762000	31703000	15359000	36918000	30516000	25696000	41323000	43355000	9497500	59188000	42243000	4533500	7280300	9277800	5019800	4745800	4331800	4798800	5654600	5162200	4994300	5985300	5055800
P02469	Laminin subunit beta-1	Lamb1	sp|P02469|LAMB1_MOUSE Laminin subunit beta-1 OS=Mus musculus OX=10090 GN=Lamb1 PE=1 SV=3	Mus musculus	CGGPGCGGLVTVAHSAWQK;NCEQCKPFYFQHPER;YSDIEPSTEGEVIFR	10090	3	3	2	2.7	197.09	56594000	1727800	3233300	8577300	2419900	1089000	4935400	2674800	6735400	7754700	2791800	7036200	7618000	2294400	1814500	5034700	1679800	962170	1610400	1456900	3208000	2044200	1776400	2812600	2472900
Q61292	Laminin subunit beta-2	Lamb2	sp|Q61292|LAMB2_MOUSE Laminin subunit beta-2 OS=Mus musculus OX=10090 GN=Lamb2 PE=1 SV=2	Mus musculus	AAQLDGLEAR;AEQLLQDAHR;AGNSLAASTAEETAGSAQSR;ALAERKAEGVLAAQAR;AQGAAQGAIWGAVVDTQNTEQTLQR;ARQLDALLEALK;CGGLGCSGAAATADLALGR;CLHNTEGPHCGYCKPGFHGQAAR;DGFFGLSASDPR;DGYSQQIVCQCR;DLLQAAQDKLQR;DLLQAAQDKLQRLQELEGTYEENER;DYTGGEHCER;EGQEVEFLVTSLPR;EQVGDQYQTVR;FLVFPRPVCLEPGISYK;GQVEQANQELR;GSCYPATGDLLVGR;HSNFLGAYDSIR;KAEGVLAAQAR;LPYGGQCRPCPCPEGPGSQR;LQELEGTYEENER;LTQLEAELTAVQDENFNANHALSGLER;RWDDVVCESR;TCSECQELY…	10090	31	31	20	23.7	196.58	1159100000	40327000	68593000	72627000	94757000	66350000	93156000	119330000	108040000	129240000	128680000	123950000	114010000	12988000	14143000	19180000	24918000	13046000	13182000	17452000	13133000	15148000	15475000	16345000	19689000
P02468	Laminin subunit gamma-1	Lamc1	sp|P02468|LAMC1_MOUSE Laminin subunit gamma-1 OS=Mus musculus OX=10090 GN=Lamc1 PE=1 SV=2	Mus musculus	ACACNPYGTVQQQSSCNPVTGQCQCLPHVSGR;AEQQTADQLLAR;CELCDDGYFGDPLGSNGPVR;CIYNTAGFYCDR;CKEGFFGNPLAPNPADKCK;CKPGFFNLESSNPK;CVCKDNVEGFNCER;DCGTCDPGYYNLQSGQGCER;EAQLALGNAAADATEAK;EAQLALGNAAADATEAKNKAHEAER;EDGPWIPYQYYSGSCENTYSK;EGFFGNPLAPNPADK;EGFVGNRCDQCEENYFYNR;GKAEQQTADQLLAR;HNTYGVDCEK;LGNTEACSPCHCSPVGSLSTQCDSYGR;LHEATDYPWRPALSPFEFQK;LQNIRNTIEETGILAER;LSAEDLVLEGAGLR;NTIEETGILAER;SQECYFDPELYR;SRVESTEQLIEI…	10090	30	30	20	26.2	177.3	932390000	48945000	88461000	47682000	63381000	65839000	81227000	95164000	87459000	78537000	68272000	97678000	109740000	12673000	14596000	15769000	17598000	12384000	12861000	16661000	14610000	13390000	14879000	16525000	17766000
Q6IAA8	Ragulator complex protein LAMTOR1	LAMTOR1	sp|Q6IAA8|LTOR1_HUMAN Ragulator complex protein LAMTOR1 OS=Homo sapiens OX=9606 GN=LAMTOR1 PE=1 SV=2	Homo sapiens	TDEQALLSSILAK	9606	1	1	0	8.1	17.745	2712800	540250	0	0	435050	0	0	912230	0	0	0	825280	0	514510	0	0	435340	0	0	633510	0	0	0	449550	0
Q9JKS4	LIM domain-binding protein 3	Ldb3	sp|Q9JKS4|LDB3_MOUSE LIM domain-binding protein 3 OS=Mus musculus OX=10090 GN=Ldb3 PE=1 SV=1	Mus musculus	GAPAYNPTGPQVTPLAR;SASYNLSLTLQK;SYSVTLTGPGPWGFR	10090	3	3	1	6.1	76.431	180310000	22862000	9952300	4779600	15833000	5310900	29876000	9729300	21277000	11285000	17936000	15657000	15812000	16050000	6906000	5199900	12981000	3747100	10660000	7072400	10472000	6930400	16502000	7992600	8151500
P06151	L-lactate dehydrogenase A chain	Ldha	sp|P06151|LDHA_MOUSE L-lactate dehydrogenase A chain OS=Mus musculus OX=10090 GN=Ldha PE=1 SV=3	Mus musculus	ATLKDQLIVNLLK;NVNIFKFIIPNIVK;SADTLWGIQKELQF;VIGSGCNLDSAR;VTLTPEEEAR	10090	5	5	3	19	36.498	119720000	5225500	11645000	6723400	5008800	10073000	753760	12401000	4365000	13315000	6192900	17494000	26524000	4235300	3688200	3569600	3730600	3232300	2394600	3914500	2081600	5912100	4165300	4898100	6481700
P16045	Galectin-1	Lgals1	sp|P16045|LEG1_MOUSE Galectin-1 OS=Mus musculus OX=10090 GN=Lgals1 PE=1 SV=3	Mus musculus	ACGLVASNLNLKPGECLK;ACGLVASNLNLKPGECLKVR;DSNNLCLHFNPR;FNAHGDANTIVCNTK;SFVLNLGK;SFVLNLGKDSNNLCLHFNPR	10090	6	6	3	40.7	14.866	2002700000	136350000	194540000	144740000	55107000	143680000	185980000	100790000	382110000	122880000	117560000	200430000	218510000	64279000	61093000	57318000	61246000	44276000	62734000	49885000	76121000	39384000	60669000	44502000	51991000
Q9UBR4	LIM/homeobox protein Lhx3	LHX3	sp|Q9UBR4|LHX3_HUMAN LIM/homeobox protein Lhx3 OS=Homo sapiens OX=9606 GN=LHX3 PE=1 SV=2	Homo sapiens	MLLETGLERDR	9606	1	1	1	2.8	43.357	56594000	0	0	2189700	2073500	9165000	1070800	1659500	6364500	4201000	0	18526000	11344000	0	0	3137900	1342200	5961000	413180	1943600	4441500	3412800	0	8257200	5824400
P48678	Prelamin-A/C	Lmna	sp|P48678|LMNA_MOUSE Prelamin-A/C OS=Mus musculus OX=10090 GN=Lmna PE=1 SV=2	Mus musculus	AAYEAELGDAR;AAYEAELGDARK;AGQVVTIWASGAGATHSPPTDLVWK;AQHEDQVEQYKK;AQNTWGCGSSLR;ARLQLELSK;ARLQLELSKVR;EAALSTALSEKR;EDLQELNDR;EDLQELNDRLAVYIDRVR;EGDLLAAQAR;ELEKTYSAKLDNAR;EVSGIKAAYEAELGDARK;IRIDSLSAQLSQLQK;IRIDSLSAQLSQLQKQLAAK;ITESEEVVSR;KLLEGEEER;LADALQELR;LADALQELRAQHEDQVEQYKK;LAVYIDRVR;LKDLEALLNSK;LKDLEALLNSKEAALSTALSEK;LLEGEEER;LQEKEDLQELNDR;LRDLEDSLAR;LRITESEEVVSR;LRLSPSPTSQR;LVEIDNGKQR;NSNLVGAA…	10090	40	40	4	52.6	74.237	5772700000	552860000	501350000	226720000	343590000	389630000	750680000	610770000	647430000	496540000	361950000	508490000	382730000	90812000	57854000	47209000	81000000	57886000	69299000	51820000	56682000	54204000	49919000	50579000	58848000
P14733	Lamin-B1	Lmnb1	sp|P14733|LMNB1_MOUSE Lamin-B1 OS=Mus musculus OX=10090 GN=Lmnb1 PE=1 SV=3	Mus musculus	ALYETELADAR;DAALATALGDKK;ELNDRLAVYIDKVR;ELTGLKALYETELADARR;ESDLSGAQIKLR;ESDLSGAQIKLREYEAALNSK;EYEAALNSKDAALATALGDKK;FKAEHDQLLLNYAK;IESLSSQLSNLQK;IESLSSQLSNLQKESR;KESDLSGAQIK;KLLEGEEER;LLEGEEER;LQEKEELR;LREYEAALNSK;MRIESLSSQLSNLQKESR;SLETENSALQLQVTER;STVFKTTIPEEEEEEEEEPIGVAVEEER	10090	18	16	5	27	66.785	679180000	28717000	33417000	59572000	18354000	36194000	120510000	73605000	46316000	87427000	86999000	41226000	46849000	11829000	10261000	26906000	7084000	12833000	15480000	34094000	19613000	27072000	15535000	13018000	16434000
P21619	Lamin-B2	Lmnb2	sp|P21619|LMNB2_MOUSE Lamin-B2 OS=Mus musculus OX=10090 GN=Lmnb2 PE=1 SV=2	Mus musculus	AGQTVTVWAAGAGATHSPPSTLVWK;ASLPPHAGPATPLSPTRLSR;EGELTVAQGR;KLLEGEEER;LLEGEEER;LQEKEELR;SEAELATALSDKQGLETEVAELR;SQTNWGPGESFR;TALVSADGEEVAVK	10090	9	6	5	20.3	67.317	108280000	3335800	10588000	5874200	4318700	14636000	7092100	6418500	15983000	8790900	8759700	15610000	6873400	2553600	3227000	4363700	3434700	3724500	1940400	2486800	2289400	2425800	3057300	3407000	1716300
Q8BVA4	Leiomodin-1	Lmod1	sp|Q8BVA4|LMOD1_MOUSE Leiomodin-1 OS=Mus musculus OX=10090 GN=Lmod1 PE=1 SV=1	Mus musculus	AEEEAAPSIFDEPLEK;ELDVVDPDGSIPVGLR	10090	2	2	2	5.4	66.309	75310000	1124300	3297700	4671500	3763300	8046200	8595000	5453300	11030000	7302000	3331400	8574000	10121000	4043100	1834600	3688300	3477600	3502800	3882100	2953000	4261700	3283700	2322100	4420500	3261300
Q5T3J3	Ligand-dependent nuclear receptor-interacting factor 1	LRIF1	sp|Q5T3J3|LRIF1_HUMAN Ligand-dependent nuclear receptor-interacting factor 1 OS=Homo sapiens OX=9606 GN=LRIF1 PE=1 SV=1	Homo sapiens	KMDHIK	9606	1	1	1	0.8	84.567	32578000	695610	0	1629400	1050300	0	5929600	2856700	3465400	2822200	14129000	0	0	0	0	0	0	0	0	0	0	0	0	0	0
Q07954	Prolow-density lipoprotein receptor-related protein 1	LRP1	sp|Q07954|LRP1_HUMAN Prolow-density lipoprotein receptor-related protein 1 OS=Homo sapiens OX=9606 GN=LRP1 PE=1 SV=2	Homo sapiens	AALSGANVLTLIEK;AVTDEEPFLIFANR;CPLNYFACPSGR;DCPDGSDEAPEICPQSK;ELLGRGPEDEIGDPLA;SERPPIFEIR;SGFHTVPGQPGCQDINECLR	9606	7	7	0	2.3	504.6	125030000	6998100	13084000	7030000	10998000	9778800	22926000	6509100	5171100	10826000	10897000	10279000	10535000	2450900	3957800	3256400	3450000	2918500	5685700	2173000	2379200	3580900	3231700	3150200	2409900
Q8K4G1	Latent-transforming growth factor beta-binding protein 4	Ltbp4	sp|Q8K4G1|LTBP4_MOUSE Latent-transforming growth factor beta-binding protein 4 OS=Mus musculus OX=10090 GN=Ltbp4 PE=1 SV=2	Mus musculus	AGPDLASCLDIDECR;ATECLDVDECR;CVCGTGFQAGPR;DCDPGYHPGPEGTCDDIDECR;DVDECQLFQDQVCK;EDGYSDASGFGYCFR;EYGSAICGAQR;GGYTCVCPDGFLLDSSR;IQQCPGTETAEYQSLCPHGR;SSCISQHVISEAK;VSGPWEEANPEALAR	10090	11	11	7	9.8	178.64	190060000	8368200	17051000	10699000	22947000	3565600	22852000	18815000	8414200	25627000	4385100	22369000	24962000	3459900	2040200	5027800	9275300	1741900	5343100	3717200	3169000	5135400	2826200	4432200	4353900
P51885	Lumican	Lum	sp|P51885|LUM_MOUSE Lumican OS=Mus musculus OX=10090 GN=Lum PE=1 SV=2	Mus musculus	FTGLQYLR;LDGNPLTQSSLPPDMYECLR;LPAGLPTSLLTLYLDNNKISNIPDEYFK;NNQIDHIDEK;SIPTVNENLENYYLEVNELEK;SIPTVNENLENYYLEVNELEKFDVKSFCK;SLEYLDLSFNQMSK;SLQDLQLTNNK;SLQDLQLTNNKISK;YLYLRNNQIDHIDEK	10090	10	10	8	37.9	38.265	2660000000	191350000	89859000	84562000	115850000	441640000	110850000	87028000	432550000	248690000	74928000	287850000	494880000	141820000	50536000	74573000	66599000	112930000	28178000	39071000	110490000	68011000	29838000	80842000	98538000
P0CW03	Lymphocyte antigen 6C2	Ly6c2	sp|P0CW03|LY6C2_MOUSE Lymphocyte antigen 6C2 OS=Mus musculus OX=10090 GN=Ly6c2 PE=1 SV=1;sp|P0CW02|LY6C1_MOUSE Lymphocyte antigen 6C1 OS=Mus musculus OX=10090 GN=Ly6c1 PE=2 SV=1	Mus musculus	ASDGFCIAQNIELIEDSQR;ASDGFCIAQNIELIEDSQRR	10090	2	2	2	15.3	14.09	78733000	3705000	2364300	3984600	2083500	12278000	7201000	8435900	14964000	8300500	2528700	7606600	5280900	3720900	1889900	4192900	2073400	8452600	4099900	5971500	8003100	5138300	2241800	4223500	2886500
P97412	Lysosomal-trafficking regulator	Lyst	sp|P97412|LYST_MOUSE Lysosomal-trafficking regulator OS=Mus musculus OX=10090 GN=Lyst PE=1 SV=1	Mus musculus	MRSVASDELHSMMQR	10090	1	1	1	0.4	425.28	1025500	0	0	0	0	1025500	0	0	0	0	0	0	0	0	0	0	0	0	0	0	0	0	0	0	0
P20645	Cation-dependent mannose-6-phosphate receptor	M6PR	sp|P20645|MPRD_HUMAN Cation-dependent mannose-6-phosphate receptor OS=Homo sapiens OX=9606 GN=M6PR PE=1 SV=1	Homo sapiens	GVGDDQLGEESEER	9606	1	1	0	5.1	30.993	506560	0	0	0	0	0	506560	0	0	0	0	0	0	0	0	0	0	0	0	0	0	0	0	0	0
P20916	Myelin-associated glycoprotein	MAG	sp|P20916|MAG_HUMAN Myelin-associated glycoprotein OS=Homo sapiens OX=9606 GN=MAG PE=1 SV=1	Homo sapiens	LREDEGTWVQVSLLHFVPTR	9606	1	1	0	3.2	69.068	17061000	673710	0	0	0	525620	0	860680	8297400	1323100	1384100	1291000	2705400	905950	0	0	0	332990	0	560660	4602200	792130	1129200	930050	1637000
P14873	Microtubule-associated protein 1B	Map1b	sp|P14873|MAP1B_MOUSE Microtubule-associated protein 1B OS=Mus musculus OX=10090 GN=Map1b PE=1 SV=2	Mus musculus	SVGNTIEPVILFQK;VLFPGNSTQYNILEGLEK	10090	2	2	1	1.3	270.25	23234000	2963800	1192100	1245900	813330	1913600	2896600	1701500	2181700	1581600	1068300	3292500	2382600	2702100	903610	1351500	846030	1298500	1634800	1187200	1371200	1043800	933570	1802000	1261600
P70218	Mitogen-activated protein kinase kinase kinase kinase 1	Map4k1	sp|P70218|M4K1_MOUSE Mitogen-activated protein kinase kinase kinase kinase 1 OS=Mus musculus OX=10090 GN=Map4k1 PE=1 SV=1	Mus musculus	EDMVMVLMDGSLK	10090	1	1	1	1.6	91.534	40095000	0	3897900	3115400	3135300	0	3147200	4848100	0	0	2977700	12204000	6769500	0	3085300	3558100	3226400	0	2495700	3383600	0	0	2967600	4754600	3483000
P26645	Myristoylated alanine-rich C-kinase substrate	Marcks	sp|P26645|MARCS_MOUSE Myristoylated alanine-rich C-kinase substrate OS=Mus musculus OX=10090 GN=Marcks PE=1 SV=2	Mus musculus	EAEAAEPEQPEQPEQPAAEEPQAEEQSEAAGEK;ESGEGAEAEGATAEGAK;ESGEGAEAEGATAEGAKDEAAAAAGGEGAAAPGEQAGGAGAEGAAGGEPR	10090	3	3	3	26.9	29.661	235160000	551080	24949000	21516000	7684600	31044000	44347000	18633000	3590200	46246000	1893400	11360000	23345000	2426200	10379000	13977000	1971000	22936000	30875000	18038000	1692200	6962100	1104500	4025000	7200300
Q8C0P0	Serine/threonine-protein kinase greatwall	Mastl	sp|Q8C0P0|GWL_MOUSE Serine/threonine-protein kinase greatwall OS=Mus musculus OX=10090 GN=Mastl PE=2 SV=2	Mus musculus	KADMINKNMTHQVQAER	10090	1	1	0	2	95.974	22932000	0	0	22932000	0	0	0	0	0	0	0	0	0	0	0	0	0	0	0	0	0	0	0	0	0
P43243	Matrin-3	MATR3	sp|P43243|MATR3_HUMAN Matrin-3 OS=Homo sapiens OX=9606 GN=MATR3 PE=1 SV=2	Homo sapiens	IGPYQPNVPVGIDYVIPK	9606	1	1	0	2.1	94.622	24892000	2327800	1477100	1064500	1374000	3045100	3807000	2291700	0	2294300	2267100	2694700	2248500	2327800	1050100	1137800	1328000	2035900	2193400	1575500	0	1449700	1952000	1453100	1173000
Q8R2Y2	Cell surface glycoprotein MUC18	Mcam	sp|Q8R2Y2|MUC18_MOUSE Cell surface glycoprotein MUC18 OS=Mus musculus OX=10090 GN=Mcam PE=1 SV=1	Mus musculus	LQDHYVELQVFKAPEEPTIQANVVGIHVDRQELR;LSLQDSVATLALSHVTPHDER;VWVEVEPVGLLK	10090	3	3	3	10.3	71.545	74510000	4097700	3398300	5588300	6291800	4624200	3740000	6407800	6891200	13359000	1621100	7794200	10697000	3581600	2514800	3924100	3413500	2786400	2008000	3079500	4300900	2052800	1469500	2344200	5658300
P14152	Malate dehydrogenase, cytoplasmic	Mdh1	sp|P14152|MDHC_MOUSE Malate dehydrogenase, cytoplasmic OS=Mus musculus OX=10090 GN=Mdh1 PE=1 SV=3	Mus musculus	EVGVYEALKDDSWLKGEFITTVQQR;FVEGLPINDFSR;SAPSIPKENFSCLTR;VIVVGNPANTNCLTASK	10090	4	4	1	20.7	36.511	179290000	7737900	8448200	19977000	12127000	24261000	17266000	19049000	13350000	14333000	8870900	12981000	20891000	3262700	2711000	13329000	4987500	6637200	3563400	6470300	4606800	4338600	3519700	6463900	10399000
P08249	Malate dehydrogenase, mitochondrial	Mdh2	sp|P08249|MDHM_MOUSE Malate dehydrogenase, mitochondrial OS=Mus musculus OX=10090 GN=Mdh2 PE=1 SV=3	Mus musculus	ANTFVAELKGLDPAR;ANTFVAELKGLDPARVNVPVIGGHAGK;ANVKGYLGPEQLPDCLK;ANVKGYLGPEQLPDCLKGCDVVVIPAGVPR;ASIKKGEDFVK;EGVVECSFVQSK;ETECTYFSTPLLLGK;ETECTYFSTPLLLGKK;FVFSLVDAMNGK;GCDVVVIPAGVPR;GLEKNLGIGKITPFEEK;GYLGPEQLPDCLK;GYLGPEQLPDCLKGCDVVVIPAGVPR;HGVYNPNKIFGVTTLDIVR;IFGVTTLDIVR;IQEAGTEVVK;IQEAGTEVVKAK;LTLYDIAHTPGVAADLSHIETR;MIAEAIPELK;MIAEAIPELKASIK;NLGIGKITPFEEK;NSPLVSRLTLYDIAHTPGVAADLSHIETR;TIIPLISQCTPK;…	10090	29	29	13	71	35.611	4827300000	187280000	466080000	174450000	217900000	380840000	960780000	474340000	368110000	231200000	465570000	411970000	488730000	81124000	95231000	66126000	68419000	86953000	103500000	99080000	71849000	60671000	125770000	89744000	85168000
Q9Z2D6	Methyl-CpG-binding protein 2	Mecp2	sp|Q9Z2D6|MECP2_MOUSE Methyl-CpG-binding protein 2 OS=Mus musculus OX=10090 GN=Mecp2 PE=1 SV=1	Mus musculus	SEDQDLQGLR;VGDTSLDPNDFDFTVTGR	10090	2	2	1	5.8	52.307	16200000	1171900	1626400	656060	1106700	2628900	1296500	923190	1094100	930360	734260	2434000	1597600	1188300	803990	721190	1049700	923840	757480	643600	687010	596130	657730	975180	840910
Q8WXB1	Protein N-lysine methyltransferase METTL21A	METTL21A	sp|Q8WXB1|MT21A_HUMAN Protein N-lysine methyltransferase METTL21A OS=Homo sapiens OX=9606 GN=METTL21A PE=1 SV=2	Homo sapiens	MALVPYEETTEFGLQK	9606	1	1	1	7.3	24.6	12662000	0	2502100	0	0	0	0	0	0	1395800	7334800	1429100	0	0	0	0	0	0	0	0	0	0	0	0	0
P55082	Microfibril-associated glycoprotein 3	MFAP3	sp|P55082|MFAP3_HUMAN Microfibril-associated glycoprotein 3 OS=Homo sapiens OX=9606 GN=MFAP3 PE=1 SV=1;sp|O75121|MFA3L_HUMAN Microfibrillar-associated protein 3-like OS=Homo sapiens OX=9606 GN=MFAP3L PE=1 SV=3	Homo sapiens	VTQFKTMEFAR	9606	1	1	0	3	40.165	1772300	0	0	0	1772300	0	0	0	0	0	0	0	0	0	0	0	0	0	0	0	0	0	0	0	0
Q9D1H9	Microfibril-associated glycoprotein 4	Mfap4	sp|Q9D1H9|MFAP4_MOUSE Microfibril-associated glycoprotein 4 OS=Mus musculus OX=10090 GN=Mfap4 PE=1 SV=1	Mus musculus	ADGEYWLGLQNLHLLTLK	10090	1	1	1	7	28.937	10408000	0	456250	337720	856850	2698200	0	0	0	2263100	0	1319000	2477100	0	287370	314150	839620	1828900	0	0	0	1449700	0	721100	1310200
P21956	Lactadherin	Mfge8	sp|P21956|MFGM_MOUSE Lactadherin OS=Mus musculus OX=10090 GN=Mfge8 PE=1 SV=3	Mus musculus	AFGWYPHLGR;DFGHIQYVASYK;EWLQVDLGTQR;GPCSPNPCYNDAK;KFEFIQDESGGDKEFLGNLDNNSLK;TGIVNAWTASNYDSKPWIQVNLLR;VAHSDDGVQWTVYEEQGSSK;VFQGNLDNNSHKK	10090	8	8	8	27.6	51.24	30302000	6495500	0	434650	8079900	3423900	1272600	1800800	0	1002500	589790	4697100	2505400	1287000	0	372970	8825000	418070	468550	816560	0	435510	389940	1726100	625600
Q99797	Mitochondrial intermediate peptidase	MIPEP	sp|Q99797|MIPEP_HUMAN Mitochondrial intermediate peptidase OS=Homo sapiens OX=9606 GN=MIPEP PE=1 SV=2	Homo sapiens	EPMLMVEGMLQK	9606	1	1	1	1.7	80.64	8400400	0	0	0	2014900	0	0	2364400	389380	850040	0	1166600	1615000	0	0	0	0	0	0	0	0	0	0	0	0
Q6ZQI3	Malectin	Mlec	sp|Q6ZQI3|MLEC_MOUSE Malectin OS=Mus musculus OX=10090 GN=Mlec PE=1 SV=2	Mus musculus	STPEDQILYQTER	10090	1	1	1	4.5	32.342	17454000	0	2504900	889080	1419100	1194200	3376100	0	0	1924400	2553400	1132300	2460400	0	1813000	976660	1396400	844760	1774100	0	0	1094900	2238200	621600	1254800
Q13875	Myelin-associated oligodendrocyte basic protein	MOBP	sp|Q13875|MOBP_HUMAN Myelin-associated oligodendrocyte basic protein OS=Homo sapiens OX=9606 GN=MOBP PE=1 SV=2	Homo sapiens	MSQKPAKEGPRLSK	9606	1	1	1	7.7	20.959	39273000	0	2264300	2798800	4400000	3596300	3414500	5648000	2590400	2805800	0	4432200	7322800	0	1392100	2954300	3522500	2648600	2395700	3365800	2163300	2274300	0	2640700	3338600
P25189	Myelin protein P0	MPZ	sp|P25189|MYP0_HUMAN Myelin protein P0 OS=Homo sapiens OX=9606 GN=MPZ PE=1 SV=1	Homo sapiens	DAISIFHYAK;DAISIFHYAKGQPYIDEVGTFK;DAISIFHYAKGQPYIDEVGTFKER;GQPYIDEVGTFK;GQPYIDEVGTFKER;IQWVGDPRWK;TSQVTLYVFEK;YQPEGGRDAISIFHYAK;YQPEGGRDAISIFHYAKGQPYIDEVGTFK	9606	9	9	5	21	27.554	2955700000	41437000	158160000	190420000	184910000	274020000	187560000	168560000	94167000	781820000	286390000	236900000	351300000	22331000	56147000	56069000	97521000	98051000	51835000	54972000	63216000	200440000	104840000	56648000	106460000
Q61830	Macrophage mannose receptor 1	Mrc1	sp|Q61830|MRC1_MOUSE Macrophage mannose receptor 1 OS=Mus musculus OX=10090 GN=Mrc1 PE=1 SV=2	Mus musculus	ACEQPLGYICK;TGVAGGLWDVLSCEEK;WENLECVQK	10090	3	3	2	2.5	164.98	21806000	530950	3981300	2504600	501900	356900	2650100	4843500	3110900	1146500	1516800	0	662740	954850	1226000	1071000	1047600	560240	1629900	1434100	1105200	1698000	1718900	0	884420
Q64449	C-type mannose receptor 2	Mrc2	sp|Q64449|MRC2_MOUSE C-type mannose receptor 2 OS=Mus musculus OX=10090 GN=Mrc2 PE=1 SV=3	Mus musculus	EALSLR;TLGDQLSLLLGAR	10090	2	2	0	1.3	167.07	26583000	0	1091100	838970	4556500	0	0	1223300	4305200	1353300	3569400	8742300	902870	0	2078600	2248400	2140900	0	0	2253500	1112200	2291300	1788900	1194800	1262200
Q9P015	39S ribosomal protein L15, mitochondrial	MRPL15	sp|Q9P015|RM15_HUMAN 39S ribosomal protein L15, mitochondrial OS=Homo sapiens OX=9606 GN=MRPL15 PE=1 SV=1	Homo sapiens	MAGPLQGGGAR	9606	1	1	1	3.7	33.419	177640	0	0	177640	0	0	0	0	0	0	0	0	0	0	0	0	0	0	0	0	0	0	0	0	0
Q13126	S-methyl-5-thioadenosine phosphorylase	MTAP	sp|Q13126|MTAP_HUMAN S-methyl-5-thioadenosine phosphorylase OS=Homo sapiens OX=9606 GN=MTAP PE=1 SV=2	Homo sapiens	IGIIGGTGLDDPEILEGR	9606	1	1	0	6.4	31.236	7548400	0	863160	638600	805280	0	2431000	0	319790	1157000	435320	0	898240	0	623420	650560	722620	0	1422900	0	201180	742690	402750	0	481540
P28665	Murinoglobulin-1	Mug1	sp|P28665|MUG1_MOUSE Murinoglobulin-1 OS=Mus musculus OX=10090 GN=Mug1 PE=1 SV=3;sp|P28666|MUG2_MOUSE Murinoglobulin-2 OS=Mus musculus OX=10090 GN=Mug2 PE=1 SV=2	Mus musculus	FSTSQSLPASQTR;LQVTASPQSLCGLR	10090	2	2	2	1.8	165.3	10741000	1705100	0	1121400	0	692850	0	1653800	2423500	3144700	0	0	0	1813600	0	1074600	0	415330	0	1338200	621940	2034200	0	0	0
Q99JI1	Musculoskeletal embryonic nuclear protein 1	Mustn1	sp|Q99JI1|MSTN1_MOUSE Musculoskeletal embryonic nuclear protein 1 OS=Mus musculus OX=10090 GN=Mustn1 PE=1 SV=1	Mus musculus	SEAGTPEGPIKK	10090	1	1	1	14.6	8.941	47391000	1739300	2074900	2608500	9043400	2154100	4582800	1216800	4179600	9685000	1555600	5797900	2753200	2012600	1444900	2730900	8606100	1410700	2586200	819360	2535100	5994200	1311900	3411700	1406900
Q9EQK5	Major vault protein	Mvp	sp|Q9EQK5|MVP_MOUSE Major vault protein OS=Mus musculus OX=10090 GN=Mvp PE=1 SV=4	Mus musculus	GIQDVYVLSEQQGLLLK;LAQDPFPLYPGELLEK	10090	2	2	2	3.8	95.923	32406000	595390	2151400	2516900	2270800	2495000	4880600	2398200	3065000	1110200	3662800	3325600	3934600	600550	655530	1555100	1344300	1500600	2004200	979370	1383000	694830	2058700	1246700	1316300
Q5XKE0	Myosin-binding protein C, fast-type	Mybpc2	sp|Q5XKE0|MYPC2_MOUSE Myosin-binding protein C, fast-type OS=Mus musculus OX=10090 GN=Mybpc2 PE=1 SV=1	Mus musculus	AFNELGEALAECKLDVRVPQ;TSDFDTVFFVR;VTNPVGEDVASIFLR	10090	3	3	2	4	127.35	24394000	589680	5028700	715840	0	430090	389250	1371200	3728900	0	5820800	1885500	4434400	1364900	1945300	671020	0	953140	846110	792960	1535000	0	3567800	892900	1794000
Q5SX40	Myosin-1	Myh1	sp|Q5SX40|MYH1_MOUSE Myosin-1 OS=Mus musculus OX=10090 GN=Myh1 PE=1 SV=1	Mus musculus	AAYLQNLNSADLLK;ADIAESQVNK;ADIAESQVNKLR;AEDEEEINAELTAK;ALQEAHQQTLDDLQAEEDKVNTLTK;ALQEAHQQTLDDLQAEEDKVNTLTKAK;ANLLQAEIEELR;ANSEVAQWR;CDQLIKTK;DIDDLELTLAK;DLEEATLQHEATAATLR;DLEEATLQHEATAATLRK;DLQHRLDEAEQLALK;DLQHRLDEAEQLALKGGK;EEQAEPDGTEVADK;ENQSILITGESGAGK;EQDTSAHLER;EQYEEEQEAK;ESFVKATVQSR;GKQAFTQQIEELKR;GQTVQQVYNSVGALAK;GRLQTESGEYSR;GSSFQTVSALFR;HADSVAELGEQIDNLQR;HADSVAELGEQIDNLQRVK;HDCDLLR;HDCDLL…	10090	69	24	5	35.3	223.34	639090000	59540000	82150000	26574000	76886000	63113000	55715000	60234000	24851000	23977000	53415000	44432000	68203000	12898000	8063500	6227100	14527000	8854300	6364300	8873700	6945900	3298400	10303000	4571500	8049200
O08638	Myosin-11	Myh11	sp|O08638|MYH11_MOUSE Myosin-11 OS=Mus musculus OX=10090 GN=Myh11 PE=1 SV=1	Mus musculus	AETELKELEQK;AIKLAKDVASLGSQLQDTQELLQEETR;ALEEALEAKEELER;AQKGQLSDDEK;ASRDEIFATSKENEK;ATLQAEQLSNELATER;DLELQADSAIKGR;DLGEELEALKTELEDTLDSTATQQELR;DVASLGSQLQDTQELLQEETR;DVASLGSQLQDTQELLQEETRQK;DVASLGSQLQDTQELLQEETRQKLNVSTK;EDQSILCTGESGAGK;EELAEELASSLSGR;EELAEELASSLSGRNTLQDEKR;EKETKALSLAR;ELEGHISDLQEDLDSER;ENADLAGELR;HTQAVEELTEQLEQFKR;HVSTLNIQLSDSK;HVSTLNIQLSDSKK;HVSTLNIQLSDSKKK;IAQLEEQVEQEAR;IRELEGHIS…	10090	61	61	28	28.3	227.03	4245500000	455880000	303410000	210330000	335720000	468740000	278660000	374480000	377890000	483180000	142800000	384020000	430390000	80194000	69180000	48087000	60962000	73358000	40088000	57533000	47919000	60380000	31988000	47573000	58560000
Q9Y2K3	Myosin-15	MYH15	sp|Q9Y2K3|MYH15_HUMAN Myosin-15 OS=Homo sapiens OX=9606 GN=MYH15 PE=1 SV=5	Homo sapiens	AEVAESQVNK;KAAIEAANLSEELK	9606	2	2	2	1.2	224.62	48002000	9588900	34101000	0	0	0	0	0	2432100	1880300	0	0	0	4729600	12826000	0	0	0	0	0	10136000	7996100	0	0	0
Q9UKX2	Myosin-2	MYH2	sp|Q9UKX2|MYH2_HUMAN Myosin-2 OS=Homo sapiens OX=9606 GN=MYH2 PE=1 SV=1	Homo sapiens	ADIAESQVNK;ADIAESQVNKLR;AEDEEEINAELTAK;ALQEAHQQTLDDLQAEEDKVNTLTK;ALQEAHQQTLDDLQAEEDKVNTLTKAK;ANLLQAEIEELR;CDQLIKTK;DIDDLELTLAK;DLEEATLQHEATAATLR;DLEEATLQHEATAATLRK;EEQAEPDGTEVADK;ELEGEVESEQKR;ENQSILITGESGAGK;EQDTSAHLER;GKQAFTQQIEELKR;GSSFQTVSALFR;HADSVAELGEQIDNLQR;HADSVAELGEQIDNLQRVK;HDCDLLR;IAEQELLDASER;IKLEQQVDDLEGSLEQEKK;KALQEAHQQTLDDLQAEEDKVNTLTK;KHADSVAELGEQIDNLQR;KIAEQELLDASERVQLLHTQNTSLINT…	9606	49	2	0	23.5	223.04	37843000	2147300	2870700	1435900	3520500	3092700	4676200	4190400	5129800	1784000	3188600	3720100	2087300	2157400	2050500	1541900	3163600	2077500	2706900	2606000	3191500	1067800	2758400	2015500	1034800
P11055	Myosin-3	MYH3	sp|P11055|MYH3_HUMAN Myosin-3 OS=Homo sapiens OX=9606 GN=MYH3 PE=2 SV=3	Homo sapiens	ADIAESQVNK;ADIAESQVNKLR;AEDEEEINAELTAK;ANSEVAQWR;DIDDLELTLAK;DLQHRLDEAEQLALK;DLQHRLDEAEQLALKGGK;EEQAEPDGTEVADK;ENQSILITGESGAGK;EQDTSAHLER;GSSFQTVSALFR;HADSVAELGEQIDNLQR;HADSVAELGEQIDNLQRVK;HDCDLLR;KHADSVAELGEQIDNLQR;KKHADSVAELGEQIDNLQR;LASADIETYLLEK;LQDSEEQVEAVNAK;NALAHALQSSR;TKYETDAIQR;VLNASAIPEGQFIDSK	9606	21	1	0	10.7	223.9	2986700	450740	294700	0	0	1529000	0	0	0	304110	0	0	408100	487960	210820	0	0	734870	0	0	0	318610	0	0	335360
Q5SX39	Myosin-4	Myh4	sp|Q5SX39|MYH4_MOUSE Myosin-4 OS=Mus musculus OX=10090 GN=Myh4 PE=2 SV=1	Mus musculus	AAYLTSLNSADLLK;ADIAESQVNK;ADIAESQVNKLR;AEDEEEINAELTAK;AKTKLEQQVDDLEGSLEQEK;ALQEAHQQTLDDLQAEEDKVNTLTK;ALQEAHQQTLDDLQAEEDKVNTLTKAK;ANLMQAEIEELR;ANLMQAEIEELRASLEQTER;ANSEVAQWR;ASLEQTER;CDQLIKTK;DIDDLELTLAK;DLEEATLQHEATAAALR;DLEEATLQHEATAAALRK;DLEEATLQHEATAAALRKK;DLQHRLDEAEQLALK;DLQHRLDEAEQLALKGGK;EEQAEPDGTEVADK;EEQAEPDGTEVADKAAYLTSLNSADLLK;ELENEVENEQKR;ENQSILITGESGAGK;EQDTSAHLER;EQYEEEQEAK;ESYVKATVQ…	10090	86	86	20	38.4	222.86	5506200000	446970000	698980000	228980000	519990000	336480000	424570000	350950000	690950000	176080000	826530000	368870000	436840000	68666000	115020000	63506000	77020000	49194000	53233000	55610000	91292000	22178000	125670000	60983000	54400000
P13533	Myosin-6	MYH6	sp|P13533|MYH6_HUMAN Myosin-6 OS=Homo sapiens OX=9606 GN=MYH6 PE=2 SV=5;sp|P12883|MYH7_HUMAN Myosin-7 OS=Homo sapiens OX=9606 GN=MYH7 PE=1 SV=5	Homo sapiens	ADIAESQVNK;ADIAESQVNKLR;ANSEVAQWR;DIDDLELTLAK;DLEEATLQHEATAAALR;DLEEATLQHEATAAALRK;DLEEATLQHEATAAALRKK;ENQSILITGESGAGK;EQDTSAHLER;HADSVAELGEQIDNLQR;HADSVAELGEQIDNLQRVK;HDCDLLR;IEELEEELEAER;KHADSVAELGEQIDNLQR;KKHADSVAELGEQIDNLQR;LASADIETYLLEK;LEQQVDDLEGSLEQEK;LEQQVDDLEGSLEQEKK;NALAHALQSAR;NFDKILAEWK;RDLEEATLQHEATAAALR;SDLSRELEEISER;TKYETDAIQR	9606	23	1	0	9.7	223.73	232720000	16693000	13481000	19313000	34794000	35688000	13406000	13720000	16458000	8562200	16124000	18487000	25992000	16693000	9584200	20642000	33629000	23861000	7723600	9432000	10192000	5410200	13883000	9969000	13560000
P13542	Myosin-8	Myh8	sp|P13542|MYH8_MOUSE Myosin-8 OS=Mus musculus OX=10090 GN=Myh8 PE=2 SV=2	Mus musculus	ADIAESQVNK;ADIAESQVNKLR;AEDEEEINAELTAK;AKTKLEQQVDDLEGSLEQEK;ALQEAHQQTLDDLQAEEDKVNTLTK;ALQEAHQQTLDDLQAEEDKVNTLTKAK;ANLLQAEIEELR;ANSEVAQWR;DIDDLELTLAK;DLEEATLQHEATAAALR;DLEEATLQHEATAAALRK;DLEEATLQHEATAAALRKK;DLQHRLDEAEQLALK;DLQHRLDEAEQLALKGGK;EEQAEPDGTEVADK;ENQSILITGESGAGK;EQDTSAHLER;GSSFQTVSALFR;HADSVAELGEQIDNLQR;HADSVAELGEQIDNLQRVK;HDCDLLR;IAEQELLDASER;IEAQNKPFDAK;IQLELNQVKSEIDR;IQLELNQVKSEIDRK;K…	10090	57	5	0	25.4	222.7	106000000	24662000	1183700	0	30816000	12846000	2042700	967300	2966300	1020400	0	4517100	24978000	17931000	3412400	0	26166000	1990800	4267400	2625300	1299200	5101000	0	2456300	3505800
Q8VDD5	Myosin-9	Myh9	sp|Q8VDD5|MYH9_MOUSE Myosin-9 OS=Mus musculus OX=10090 GN=Myh9 PE=1 SV=4	Mus musculus	AKQTLENERGELANEVK;ANLQIDQINTDLNLER;AQQAADKYLYVDKNFINNPLAQADWAAK;DELADEIANSSGKGALALEEK;EDQSILCTGESGAGK;EKETKALSLAR;KFDQLLAEEK;QLLQANPILEAFGNAK;TQLEELEDELQATEDAK;TQLEELEDELQATEDAKLR;VISGVLQLGNIAFKK	10090	11	5	1	8.6	226.37	41079000	3315100	0	1211400	1851400	3054800	1819900	7294300	4514700	919320	14190000	2908200	0	5903700	0	2341400	3618700	2477200	2107000	2048400	2990500	1174700	1324900	1498500	0
P05977	Myosin light chain 1/3, skeletal muscle isoform	Myl1	sp|P05977|MYL1_MOUSE Myosin light chain 1/3, skeletal muscle isoform OS=Mus musculus OX=10090 GN=Myl1 PE=1 SV=2	Mus musculus	ALGTNPTNAEVK;ALGTNPTNAEVKK;DQGGYEDFVEGLR;EQQEDFKEAFLLFDR;HVLATLGEK;IDLSAIKIEFSK;IEFSKEQQEDFKEAFLLFDR;ITLSQVGDVLR;ITLSQVGDVLRALGTNPTNAEVK;ITLSQVGDVLRALGTNPTNAEVKK;KPAAAPAPAPAPAPAPAKPK;KPAAAPAPAPAPAPAPAKPKEEK;TGECKITLSQVGDVLR;TGECKITLSQVGDVLRALGTNPTNAEVK;VLGNPSNEEMNAK	10090	15	15	12	60.6	20.594	2795300000	134970000	173130000	46743000	274880000	496590000	91590000	159360000	560160000	145490000	118530000	374020000	219830000	51374000	48811000	23763000	78917000	99010000	25261000	43095000	102810000	51431000	74448000	79459000	47368000
P60660	Myosin light polypeptide 6	MYL6	sp|P60660|MYL6_HUMAN Myosin light polypeptide 6 OS=Homo sapiens OX=9606 GN=MYL6 PE=1 SV=2	Homo sapiens	ALGQNPTNAEVLK;ALGQNPTNAEVLKVLGNPK;CDFTEDQTAEFK;CDFTEDQTAEFKEAFQLFDRTGDGK;EAFQLFDRTGDGK;HVLVTLGEK;NKDQGTYEDYVEGLR;NKDQGTYEDYVEGLRVFDK;VLDFEHFLPMLQTVAK	9606	9	9	0	58.3	16.93	1490300000	143540000	190960000	55223000	139670000	112560000	105550000	110650000	70317000	93722000	102240000	120130000	245690000	49072000	48691000	54025000	61574000	65603000	35537000	49497000	30876000	61604000	39049000	61058000	90685000
P24844	Myosin regulatory light polypeptide 9	MYL9	sp|P24844|MYL9_HUMAN Myosin regulatory light polypeptide 9 OS=Homo sapiens OX=9606 GN=MYL9 PE=1 SV=4;sp|P19105|ML12A_HUMAN Myosin regulatory light chain 12A OS=Homo sapiens OX=9606 GN=MYL12A PE=1 SV=2;sp|O14950|ML12B_HUMAN Myosin regulatory light chain 12B	Homo sapiens	ATSNVFAMFDQSQIQEFK;EAPIDKKGNFNYVEFTR;GNFNYVEFTR;LNGTDPEDVIR	9606	4	4	0	26.7	19.827	125150000	2645600	4683200	4364100	8727500	6070800	3762500	8055300	9225800	8998000	10614000	18250000	39750000	2981500	4541000	3313500	6610100	3198200	2513600	2942600	3110100	4828100	3566700	5048200	8924200
Q6PDN3	Myosin light chain kinase, smooth muscle	Mylk	sp|Q6PDN3|MYLK_MOUSE Myosin light chain kinase, smooth muscle OS=Mus musculus OX=10090 GN=Mylk PE=1 SV=3	Mus musculus	AVNVYGTSEPSQESELTAVGEKPEEPK;DLEVVEGSAAR;LQDVHVAEGEK;QAQVNLTVVDKPDPPAGTPCASDIR;VSDVYDIEER	10090	5	5	3	4.3	212.92	70514000	4061400	7590100	4947300	9055300	781790	16207000	5866600	5194300	3453300	0	11307000	2049400	3156200	3278800	3907700	2231400	1534600	3578600	2614900	1599700	3135400	0	3606500	0
P97457	Myosin regulatory light chain 2, skeletal muscle isoform	Mylpf	sp|P97457|MLRS_MOUSE Myosin regulatory light chain 2, skeletal muscle isoform OS=Mus musculus OX=10090 GN=Mylpf PE=1 SV=3	Mus musculus	DGIIDKEDLR;EAFTVIDQNRDGIIDKEDLR;GADPEDVITGAFK;LKGADPEDVITGAFK;LKGADPEDVITGAFKVLDPEGK;NICYVITHGDAK;NICYVITHGDAKDQE;QFLEELLTTQCDR;QFLEELLTTQCDRFSQEEIK	10090	9	9	2	45.6	18.955	499300000	36978000	100850000	16473000	19273000	58202000	32846000	31550000	41319000	49299000	37526000	25375000	49601000	20614000	20124000	13844000	11813000	27626000	8520800	12353000	14043000	10005000	18734000	9332600	12493000
O00159	Unconventional myosin-Ic	MYO1C	sp|O00159|MYO1C_HUMAN Unconventional myosin-Ic OS=Homo sapiens OX=9606 GN=MYO1C PE=1 SV=4	Homo sapiens	GEELLSPLNLEQAAYAR;LLQSNPVLEAFGNAK	9606	2	2	0	3	121.68	16569000	0	0	0	0	795260	4895800	1906800	2478100	0	1979000	3029700	1484200	0	0	0	0	689770	2098100	1324900	1723900	0	1133500	1043500	1265500
Q8IVL1	Neuron navigator 2	NAV2	sp|Q8IVL1|NAV2_HUMAN Neuron navigator 2 OS=Homo sapiens OX=9606 GN=NAV2 PE=1 SV=3	Homo sapiens	QMPPSDAEGDPLMNMLMR	9606	1	1	1	0.7	268.16	47623000	4759500	0	2182300	5591000	0	4741200	8337500	2096300	4881000	3400900	6351300	5281700	3734300	0	2614200	3979000	0	2829000	7399300	1950200	3006000	2929000	3167700	2841400
P13595	Neural cell adhesion molecule 1	Ncam1	sp|P13595|NCAM1_MOUSE Neural cell adhesion molecule 1 OS=Mus musculus OX=10090 GN=Ncam1 PE=1 SV=3	Mus musculus	DGEPIENEEEDDEKHIFSDDSSELTIR;FIVLSNNYLQIR;GLGEISAATEFK;IGQESLEFILVQADTPSSPSIDR;LAALNGKGLGEISAATEFK;VEPYSSTAQVQFDEPEATGGVPILK	10090	6	6	5	9.5	119.43	104630000	2437400	4580800	5548400	1766400	10012000	4149800	18605000	5527800	6918500	2590400	34030000	8465200	1161100	1621000	2216000	1005000	3506800	2286500	4212500	3001000	3034400	1037700	8582900	1412500
Q62433	Protein NDRG1	Ndrg1	sp|Q62433|NDRG1_MOUSE Protein NDRG1 OS=Mus musculus OX=10090 GN=Ndrg1 PE=1 SV=1	Mus musculus	ELHDVDLAEVKPLVEK;LNITPNSGATGNNAGPK;TASGSSVTSLEGTR	10090	3	3	3	11.9	43.008	41614000	534170	0	2227400	0	4622900	8714700	7854300	4176100	1629000	2680900	8514200	660310	486770	0	1307600	0	1837700	3260900	2565200	1354000	555340	1972400	3454300	313920
Q9QYG0	Protein NDRG2	Ndrg2	sp|Q9QYG0|NDRG2_MOUSE Protein NDRG2 OS=Mus musculus OX=10090 GN=Ndrg2 PE=1 SV=1	Mus musculus	AELQEVQITEEKPLLPGQTPETAK;AELQEVQITEEKPLLPGQTPETAKEAELAAR	10090	2	2	2	8.4	40.789	42534000	1809100	10334000	2786300	0	8028700	0	3562900	1982000	8302500	4175400	1553500	0	945890	4229400	1887800	0	4632100	0	1317800	1945100	4084200	5533100	1327600	0
Q9CQ75	NADH dehydrogenase [ubiquinone] 1 alpha subcomplex subunit 2	Ndufa2	sp|Q9CQ75|NDUA2_MOUSE NADH dehydrogenase [ubiquinone] 1 alpha subcomplex subunit 2 OS=Mus musculus OX=10090 GN=Ndufa2 PE=1 SV=3	Mus musculus	TVSLNNLSADEVTR	10090	1	1	1	14.1	10.916	24226000	0	0	888890	0	0	0	4729900	2308900	1360600	2511000	2422400	10004000	0	0	950080	0	0	0	3251700	1429700	859730	2162000	1306300	5219100
Q9CQZ5	NADH dehydrogenase [ubiquinone] 1 alpha subcomplex subunit 6	Ndufa6	sp|Q9CQZ5|NDUA6_MOUSE NADH dehydrogenase [ubiquinone] 1 alpha subcomplex subunit 6 OS=Mus musculus OX=10090 GN=Ndufa6 PE=1 SV=1	Mus musculus	QAAAAAASTSVKPIFSR	10090	1	1	1	13	15.283	13549000	0	0	0	0	0	0	0	0	795690	845680	3557800	8349900	0	0	0	0	0	0	0	0	502770	728140	1918500	4356200
P0DN34	NADH dehydrogenase [ubiquinone] 1 beta subcomplex subunit 1	Ndufb1	sp|P0DN34|NDUB1_MOUSE NADH dehydrogenase [ubiquinone] 1 beta subcomplex subunit 1 OS=Mus musculus OX=10090 GN=Ndufb1 PE=1 SV=1	Mus musculus	ELRPNEEVTWK	10090	1	1	1	19.3	6.954	31369000	0	3154200	721100	443830	1360200	3341000	575810	4191100	6010200	6983600	2431400	2156800	0	2421200	951020	409260	867640	1836400	377660	2751400	3839000	5736600	1250900	1073500
Q9CQC7	NADH dehydrogenase [ubiquinone] 1 beta subcomplex subunit 4	Ndufb4	sp|Q9CQC7|NDUB4_MOUSE NADH dehydrogenase [ubiquinone] 1 beta subcomplex subunit 4 OS=Mus musculus OX=10090 GN=Ndufb4 PE=1 SV=3	Mus musculus	YKPAPLATLPSTLDPAEYDVSPETR	10090	1	1	1	19.4	15.081	24488000	1787500	1707900	1817700	2974500	1043100	1964300	2823000	2091200	604580	3730700	3943100	0	1787500	1214200	992240	2875000	697420	1131700	1940700	1295000	382020	3212200	2126300	0
Q3UIU2	NADH dehydrogenase [ubiquinone] 1 beta subcomplex subunit 6	Ndufb6	sp|Q3UIU2|NDUB6_MOUSE NADH dehydrogenase [ubiquinone] 1 beta subcomplex subunit 6 OS=Mus musculus OX=10090 GN=Ndufb6 PE=1 SV=3	Mus musculus	MSGYTPDEKLR;SGYTPDEKLR	10090	2	2	2	8.6	15.515	30821000	612110	5685900	2441100	3274700	1602800	8379100	0	2020100	0	2883900	0	3921300	0	5850900	0	1206200	1935200	1142100	0	1857100	0	2578800	0	1188100
Q9D6J5	NADH dehydrogenase [ubiquinone] 1 beta subcomplex subunit 8, mitochondrial	Ndufb8	sp|Q9D6J5|NDUB8_MOUSE NADH dehydrogenase [ubiquinone] 1 beta subcomplex subunit 8, mitochondrial OS=Mus musculus OX=10090 GN=Ndufb8 PE=1 SV=1	Mus musculus	GGDPTKEPEPVVHYDI	10090	1	1	1	8.6	21.876	29165000	0	2190500	257960	2366900	1902200	3877800	2273800	7610000	0	5064900	1330200	2290700	0	1379200	376440	1840300	1184800	2828500	1979000	3164200	0	5521100	771110	1130800
Q9CQJ8	NADH dehydrogenase [ubiquinone] 1 beta subcomplex subunit 9	Ndufb9	sp|Q9CQJ8|NDUB9_MOUSE NADH dehydrogenase [ubiquinone] 1 beta subcomplex subunit 9 OS=Mus musculus OX=10090 GN=Ndufb9 PE=1 SV=3	Mus musculus	EAEEEFWQNQHPQPYIFPDSPGGTSFER	10090	1	1	1	15.6	21.984	16477000	0	1872100	2154900	0	0	0	0	2866000	9583800	0	0	0	0	1331000	2303200	0	0	0	0	1774700	6055700	0	0	0
Q91VD9	NADH-ubiquinone oxidoreductase 75 kDa subunit, mitochondrial	Ndufs1	sp|Q91VD9|NDUS1_MOUSE NADH-ubiquinone oxidoreductase 75 kDa subunit, mitochondrial OS=Mus musculus OX=10090 GN=Ndufs1 PE=1 SV=2	Mus musculus	ALSEIAGITLPYDTLDQVR;GLLTYTSWEDALSR	10090	2	2	1	4.5	79.776	33851000	2327200	3523200	3250100	2202600	2254400	2798700	3444300	2440800	2750700	1488900	4998900	2371100	2355500	2091400	3516000	2154800	1137700	1498300	2396700	1529800	1759200	1218800	2728400	1252000
P52503	NADH dehydrogenase [ubiquinone] iron-sulfur protein 6, mitochondrial	Ndufs6	sp|P52503|NDUS6_MOUSE NADH dehydrogenase [ubiquinone] iron-sulfur protein 6, mitochondrial OS=Mus musculus OX=10090 GN=Ndufs6 PE=1 SV=2	Mus musculus	IIACDGGGGALGHPK;TGTCGYCGLQFK	10090	2	2	2	23.3	13.02	6383800	0	1640600	0	0	1302900	0	0	0	2124900	0	0	1315500	0	1166300	0	0	0	0	0	0	0	0	0	686290
Q91YT0	NADH dehydrogenase [ubiquinone] flavoprotein 1, mitochondrial	Ndufv1	sp|Q91YT0|NDUV1_MOUSE NADH dehydrogenase [ubiquinone] flavoprotein 1, mitochondrial OS=Mus musculus OX=10090 GN=Ndufv1 PE=1 SV=1	Mus musculus	HFRPELEDR;YLVVNADEGEPGTCKDR	10090	2	2	1	5.6	50.834	18122000	0	2973800	1345000	0	1374900	2749900	0	3985200	2160100	0	3533700	0	0	2083300	1314200	0	939750	908590	0	1074800	1048200	0	2480300	0
P19246	Neurofilament heavy polypeptide	Nefh	sp|P19246|NFH_MOUSE Neurofilament heavy polypeptide OS=Mus musculus OX=10090 GN=Nefh PE=1 SV=3	Mus musculus	EAQGQEGEEAEEGEEK;IGFGPSPFSLTEGLPK;LEQEHLLEDIAHVR;SEKEQLQALNDR;SLEGEAAALRQQQAGR;TTELEALKSTK;TTELEALKSTKESLER	10090	7	7	3	8.3	116.99	123570000	2451800	3389200	1598400	10357000	13323000	9479200	4620900	5040700	9469300	17195000	18470000	28180000	3333200	3125100	1530000	7019800	5797600	3062000	2393700	2447200	2457400	5441700	3459000	4977700
P08551	Neurofilament light polypeptide	Nefl	sp|P08551|NFL_MOUSE Neurofilament light polypeptide OS=Mus musculus OX=10090 GN=Nefl PE=1 SV=5	Mus musculus	ALYEQEIR;AQLQDLNDRFASFIER;DLRLAAEDATNEK;DLRLAAEDATNEKQALQGER;EEGEEEEGAEEEEAAK;EGLEETLRNLQAR;FTVLTESAAK;FTVLTESAAKNTDAVR;KGADEAALAR;KLLEGEETR;LAAEDATNEKQALQGER;LMEARKGADEAALAR;SRFTVLTESAAKNTDAVR;TQEKAQLQDLNDR;VHELEQQNKVLEAELLVLR;YEEEVLSR;YEEEVLSREDAEGR	10090	17	16	1	28	61.508	1838600000	52711000	69937000	151930000	109110000	117020000	238590000	88870000	201020000	280360000	78372000	276330000	174410000	17070000	23103000	52259000	44898000	38777000	62239000	31670000	40353000	87208000	42765000	27733000	57012000
P07197	Neurofilament medium polypeptide	NEFM	sp|P07197|NFM_HUMAN Neurofilament medium polypeptide OS=Homo sapiens OX=9606 GN=NEFM PE=1 SV=3	Homo sapiens	DYLKTDISTALK;DYLKTDISTALKEIR;HLREYQDLLNVK;HNHDLSSYQDTIQQLENELR;KLLEGEETR;LRDDTEAAIR;LTEAAEQNKEAIR;QASHAQLGDAYDQEIR;SIELESVRGTK;SIELESVRGTKESLER;SNEKEQLQGLNDR;SNEKEQLQGLNDRFAGYIEK;SNHEEEVADLLAQIQASHITVER;TDISTALKEIR;VHYLEQQNKEIEAEIQALRQK;VQSLQDEVAFLR;YAKLTEAAEQNKEAIR	9606	17	16	0	20.7	102.47	743710000	35015000	27592000	31487000	88504000	33406000	96761000	23754000	77551000	190040000	27523000	42352000	69729000	16857000	7178600	19648000	18594000	11182000	16245000	8370200	19262000	31673000	8335100	8829500	17321000
P10493	Nidogen-1	Nid1	sp|P10493|NID1_MOUSE Nidogen-1 OS=Mus musculus OX=10090 GN=Nid1 PE=1 SV=2	Mus musculus	ASLHGGEPTTIIR;ASLHGGEPTTIIRQDLGSPEGIALDHLGR;CGNHAVCNNLPGTFR;CPDNTLGVDCIER;DESQVPAVVGFSK;GFPEVSFQPTSVVVVTWESVAPYGGPSSSPAEEGKR;GIVTDPVRGNLYWTDWNRDNPK;KVLEGLQYPFAVTSYGK;RVLFDTGLVNPR;SNGAYNIFANDRESIENLAK;SSNAGHQGVWVFEIGSPATAK;TIFWTDSQLDR;VLEGLQYPFAVTSYGK;VLFDTGLVNPR;YALSNSIGPVR	10090	15	15	13	17.7	136.54	1448200000	40137000	25701000	85830000	57571000	108740000	380840000	196970000	74881000	130340000	123120000	90104000	133990000	37515000	30494000	50691000	32572000	31980000	45138000	45651000	31883000	42615000	37796000	40344000	44537000
O88322	Nidogen-2	Nid2	sp|O88322|NID2_MOUSE Nidogen-2 OS=Mus musculus OX=10090 GN=Nid2 PE=1 SV=2	Mus musculus	AFALYSEDEGVLR;ASLEAGAEPETIITSGLISPEGLAIDHFRR;CGPNSVCVNLVGSYR;DDQYVPQCDDLGHFIPLQCHGK;ESLLEHYGGTPR;ESYNVQLQLPAR;FAVTNQIGPVEVDSAPVGVNPCYDGSHTCDTTAR;ILINKDIGLPNGLTFDPFSK;ITQTAEGLDPENYLSIK;SCVDVNECATGFHR;SHLYGITAVYPYCPTGR;VLFHTDLVNPR;YAQTQHAYPGSR	10090	13	13	9	16.3	153.91	169990000	1484800	4492600	5194500	6777100	6483800	21748000	15883000	16968000	13848000	5057600	34272000	37781000	532520	1032000	2944200	2819800	2434100	5021000	4139700	3452300	3208400	2224500	5174900	5570900
Q01768	Nucleoside diphosphate kinase B	Nme2	sp|Q01768|NDKB_MOUSE Nucleoside diphosphate kinase B OS=Mus musculus OX=10090 GN=Nme2 PE=1 SV=1	Mus musculus	DRPFFPGLVK;NIIHGSDSVESAEK;TFIAIKPDGVQR	10090	3	3	0	23.7	17.363	117470000	4810000	4519200	6562700	3990600	5902200	4955800	3909200	13126000	27543000	10263000	20638000	11249000	3914200	1502800	5232700	3092100	3369800	2153900	1954900	7625600	8763400	7860100	8841400	4841700
Q8VCQ3	Nuclear receptor-binding factor 2	Nrbf2	sp|Q8VCQ3|NRBF2_MOUSE Nuclear receptor-binding factor 2 OS=Mus musculus OX=10090 GN=Nrbf2 PE=1 SV=1	Mus musculus	MEVMEGPLNLAHQQSRR	10090	1	1	0	5.9	32.5	30672000	0	4245500	0	2665900	0	0	6830200	2893500	0	5982200	8054900	0	0	3463200	0	2446900	0	0	4319600	2668300	0	4524100	4154500	0
Q02818	Nucleobindin-1	NUCB1	sp|Q02818|NUCB1_HUMAN Nucleobindin-1 OS=Homo sapiens OX=9606 GN=NUCB1 PE=1 SV=4	Homo sapiens	LSQETEALGR;YLESLGEEQRK	9606	2	2	0	4.6	53.879	7025000	450380	0	0	1645600	788480	332930	1050100	0	0	586180	767230	1404100	577330	0	0	970420	624620	0	730950	0	0	611170	372120	736280
P49790	Nuclear pore complex protein Nup153	NUP153	sp|P49790|NU153_HUMAN Nuclear pore complex protein Nup153 OS=Homo sapiens OX=9606 GN=NUP153 PE=1 SV=2	Homo sapiens	MASGAGGVGGGGGGKIRTR	9606	2	2	1	1.3	153.94	22524000	0	0	0	0	7978200	9385700	0	5160300	0	0	0	0	0	0	0	0	5334200	5407500	0	3195400	0	0	0	0
P29758	Ornithine aminotransferase, mitochondrial	Oat	sp|P29758|OAT_MOUSE Ornithine aminotransferase, mitochondrial OS=Mus musculus OX=10090 GN=Oat PE=1 SV=1	Mus musculus	AFYNNVLGEYEEYITK;DNGLLAKPTHGDIIR;HQVLFIADEIQTGLAR;IVFADGNFWGR;KTEQGPPSSEYIFER;LAPPLVIKEDEIR;SQVDKLTLTSR;TEQGPPSSEYIFER;YGAHNYHPLPVALER	10090	9	9	4	25.5	48.354	197790000	6573800	12791000	9315000	9874400	18830000	20462000	33856000	14313000	26762000	4574200	18059000	22377000	4976500	2694200	4278600	4065100	4184900	3796900	3810700	4429000	6238800	3362700	5688800	5401900
Q9D3H2	Odorant-binding protein 1a	Obp1a	sp|Q9D3H2|OBP1A_MOUSE Odorant-binding protein 1a OS=Mus musculus OX=10090 GN=Obp1a PE=1 SV=2	Mus musculus	FAELAEEK;FAELAEEKGIPAGNIR;FAELAEEKGIPAGNIREVLITDYCPE;GIPAGNIREVLITDYCPE;LLFILGHGPLTSEQK;LLFILGHGPLTSEQKEK;LVDESPENLTFYSENVDR;TKLLFILGHGPLTSEQK	10090	8	8	8	38.7	18.469	51530000	4633900	468990	380680	569270	0	2480300	0	797930	337390	41129000	731860	0	304560	73119	80774	93929	0	175950	0	89011	58467	26085000	79550	0
Q60597	2-oxoglutarate dehydrogenase, mitochondrial	Ogdh	sp|Q60597|ODO1_MOUSE 2-oxoglutarate dehydrogenase, mitochondrial OS=Mus musculus OX=10090 GN=Ogdh PE=1 SV=3	Mus musculus	FGLEGCEVLIPALK;FLDTAFDLDAFK;FLDTAFDLDAFKK;FLDTAFDLDAFKKFS;NTNAGAPPGTAYQSPLSLSR	10090	5	5	4	4.8	116.45	130370000	4878100	10919000	4774900	6635700	6603900	30520000	8474400	10490000	5727300	14339000	13795000	13211000	2247400	1715000	2289600	2215000	1670200	11498000	2402000	1955000	1126400	4806200	2976900	3215600
Q62000	Mimecan	Ogn	sp|Q62000|MIME_MOUSE Mimecan OS=Mus musculus OX=10090 GN=Ogn PE=1 SV=1	Mus musculus	ERIEEIR;IEEIRLEGNPIALGKHPNSFICLK;LEGNPIALGK;LEGNPIALGKHPNSFICLK;RLDFTGNLIEDIEDGTFSK	10090	5	5	4	15.1	34.012	868940000	50030000	40200000	12179000	54345000	91114000	77800000	44747000	80262000	73455000	63450000	141180000	140180000	50093000	16219000	18008000	16720000	19726000	31556000	7288000	21025000	24802000	15170000	34058000	31494000
Q9D0K2	Succinyl-CoA:3-ketoacid coenzyme A transferase 1, mitochondrial	Oxct1	sp|Q9D0K2|SCOT1_MOUSE Succinyl-CoA:3-ketoacid coenzyme A transferase 1, mitochondrial OS=Mus musculus OX=10090 GN=Oxct1 PE=1 SV=1	Mus musculus	AGGAGVPAFYTSTGYGTLVQEGGSPIKYNKDGSVAIASKPR;DGSVAIASKPR;TGVKDLTAVSNNAGVDNFGLGLLLR	10090	3	3	2	12.7	55.988	69668000	1755100	1051400	1082100	3231700	963460	0	8105200	1375500	11443000	1074000	9742100	29845000	2412300	1731900	2557900	7237200	1520400	0	3115900	1973500	3941500	1097300	2613700	4564100
P09103	Protein disulfide-isomerase	P4hb	sp|P09103|PDIA1_MOUSE Protein disulfide-isomerase OS=Mus musculus OX=10090 GN=P4hb PE=1 SV=2	Mus musculus	AAAKLKAEGSEIR;EADDIVNWLK;EADDIVNWLKKR;FLESGGQDGAGDDEDLDLEEALEPDMEEDDDQKAVK;IFGGEIKTHILLFLPK;ILEFFGLKKEECPAVR;LAKVDATEESDLAQQYGVR;LGETYKDHENIIIAK;LLDFIKHNQLPLVIEFTEQTAPK;SVSDYDGKLSSFKR;THILLFLPK;VDATEESDLAQQYGVR	10090	12	12	5	32.2	57.058	327290000	18406000	25886000	32670000	19453000	16905000	44346000	24824000	29074000	13775000	24169000	54262000	23520000	11994000	10625000	14500000	9569300	7873400	5956700	9623000	10042000	3913800	8603400	6132600	7123400
P11940	Polyadenylate-binding protein 1	PABPC1	sp|P11940|PABP1_HUMAN Polyadenylate-binding protein 1 OS=Homo sapiens OX=9606 GN=PABPC1 PE=1 SV=2;sp|Q13310|PABP4_HUMAN Polyadenylate-binding protein 4 OS=Homo sapiens OX=9606 GN=PABPC4 PE=1 SV=1	Homo sapiens	SLGYAYVNFQQPADAER	9606	1	1	0	2.7	70.67	18017000	708670	605680	673610	0	1833400	0	2094200	650500	4908000	0	2106800	4436500	720750	471330	732260	0	1155500	0	1326300	409680	3154100	0	1155500	2354000
Q9ET54	Palladin	Palld	sp|Q9ET54|PALLD_MOUSE Palladin OS=Mus musculus OX=10090 GN=Palld PE=1 SV=2	Mus musculus	AAFQPEASPSHLTLNSGLVESEDL;ENESLTHSTER;IASDEEIQGTKDAVIQDLER;LQNTGVADGYPVRLECR	10090	4	4	2	5.1	152.13	82630000	1949500	4502600	2710300	1016300	11529000	5487400	2992200	15567000	27539000	622540	2336900	6377800	2172800	6743500	2138400	1998900	3814000	2065300	5219000	2683800	4368600	1176600	2654700	2019900
P19021	Peptidyl-glycine alpha-amidating monooxygenase	PAM	sp|P19021|AMD_HUMAN Peptidyl-glycine alpha-amidating monooxygenase OS=Homo sapiens OX=9606 GN=PAM PE=1 SV=2	Homo sapiens	MENKPTSSELQK	9606	1	1	1	1.2	108.33	3279900	0	0	220360	0	0	0	0	0	789680	0	983570	1286300	0	0	0	0	0	0	0	0	0	0	0	0
Q58A45	PAB-dependent poly(A)-specific ribonuclease subunit PAN3	PAN3	sp|Q58A45|PAN3_HUMAN PAN2-PAN3 deadenylation complex subunit PAN3 OS=Homo sapiens OX=9606 GN=PAN3 PE=1 SV=3	Homo sapiens	LGMLEERLVPMGSK	9606	1	1	1	1.6	95.612	4811700	0	0	0	0	0	0	0	0	0	0	4811700	0	0	0	0	0	0	0	0	0	0	0	0	0
P11498	Pyruvate carboxylase, mitochondrial	PC	sp|P11498|PYC_HUMAN Pyruvate carboxylase, mitochondrial OS=Homo sapiens OX=9606 GN=PC PE=1 SV=2	Homo sapiens	ADFAQACQDAGVR;AEAEAQAEELSFPR	9606	2	2	0	2.3	129.63	17290000	0	201110	745720	0	528790	2945400	1554300	2877800	974860	0	1515300	5946200	0	482000	1138000	0	757950	1080700	881990	1084300	508450	0	674480	1397900
Q15365	Poly(rC)-binding protein 1	PCBP1	sp|Q15365|PCBP1_HUMAN Poly(rC)-binding protein 1 OS=Homo sapiens OX=9606 GN=PCBP1 PE=1 SV=2;sp|Q15366|PCBP2_HUMAN Poly(rC)-binding protein 2 OS=Homo sapiens OX=9606 GN=PCBP2 PE=1 SV=1;sp|P57721|PCBP3_HUMAN Poly(rC)-binding protein 3 OS=Homo sapiens OX=9606	Homo sapiens	INISEGNCPER	9606	1	1	0	3.1	37.497	11747000	755150	0	375940	1159000	673890	0	2346700	712180	616500	963620	1074600	3069800	769660	0	479510	1034600	522500	0	1676400	514170	404790	825960	602150	1352600
Q61398	Procollagen C-endopeptidase enhancer 1	Pcolce	sp|Q61398|PCOC1_MOUSE Procollagen C-endopeptidase enhancer 1 OS=Mus musculus OX=10090 GN=Pcolce PE=1 SV=2	Mus musculus	SNQDQILNNLSK	10090	1	1	1	2.6	50.167	787770	0	0	0	0	0	0	0	0	787770	0	0	0	0	0	0	0	0	0	0	0	0	0	0	0
P05622	Platelet-derived growth factor receptor beta	Pdgfrb	sp|P05622|PGFRB_MOUSE Platelet-derived growth factor receptor beta OS=Mus musculus OX=10090 GN=Pdgfrb PE=1 SV=2	Mus musculus	LVEPVTDYLFGVPSR	10090	1	1	1	1.4	122.79	7998500	448680	0	757600	0	1017600	815890	0	0	1056600	1141700	1155200	1605200	450870	0	782350	0	683670	506350	0	0	670900	987770	634280	803690
P08559	Pyruvate dehydrogenase E1 component subunit alpha, somatic form, mitochondrial	PDHA1	sp|P08559|ODPA_HUMAN Pyruvate dehydrogenase E1 component subunit alpha, somatic form, mitochondrial OS=Homo sapiens OX=9606 GN=PDHA1 PE=1 SV=3;sp|P29803|ODPAT_HUMAN Pyruvate dehydrogenase E1 component subunit alpha, testis-specific form, mitochondrial OS=H	Homo sapiens	LEEGPPVTTVLTR;TREEIQEVR	9606	2	2	0	5.6	43.295	3986300	0	1816900	348320	248520	510440	0	0	0	0	0	0	1062100	0	933200	501000	402420	351720	0	0	0	0	0	0	611230
Q9D051	Pyruvate dehydrogenase E1 component subunit beta, mitochondrial	Pdhb	sp|Q9D051|ODPB_MOUSE Pyruvate dehydrogenase E1 component subunit beta, mitochondrial OS=Mus musculus OX=10090 GN=Pdhb PE=1 SV=1	Mus musculus	DEKVFLLGEEVAQYDGAYKVSR;DIIFAVKKTLNI;VFLLGEEVAQYDGAYKVSR;VLEDNSVPQVK	10090	4	4	2	12.5	38.937	90270000	1097900	5853400	3329000	3393400	11382000	10032000	4648200	11506000	11615000	4319600	11774000	11320000	1248900	1779800	1931300	6221800	3103400	3220000	1474300	2739800	5449900	1859600	2799300	2776900
P27773	Protein disulfide-isomerase A3	Pdia3	sp|P27773|PDIA3_MOUSE Protein disulfide-isomerase A3 OS=Mus musculus OX=10090 GN=Pdia3 PE=1 SV=2	Mus musculus	ALEQFLQEYFDGNLKR;DGEEAGAYDGPR;DGKALEQFLQEYFDGNLKR;DLFSDGHSEFLK;DLLTAYYDVDYEK;DLLTAYYDVDYEKNAK;EATNPPIIQEEKPK;ELNDFISYLQR;FAHTNIESLVK;FISDKDASVVGFFR;GIVPLAKVDCTANTNTCNKYGVSGYPTLK;IFRDGEEAGAYDGPR;KTFSHELSDFGLESTTGEVPVVAIR;KYEGGRELNDFISYLQR;LAPEYEAAATR;LSKDPNIVIAK;MDATANDVPSPYEVK;TADGIVSHLKK;TFSHELSDFGLESTTGEVPVVAIR;VDCTANTNTCNK	10090	20	20	13	43.6	56.678	482830000	16957000	16646000	33872000	21089000	52602000	73869000	37945000	20529000	60854000	38280000	46445000	63747000	5954300	10233000	9498000	5287600	11317000	11142000	9217100	6259200	7735400	6226900	9462000	8089700
Q922R8	Protein disulfide-isomerase A6	Pdia6	sp|Q922R8|PDIA6_MOUSE Protein disulfide-isomerase A6 OS=Mus musculus OX=10090 GN=Pdia6 PE=1 SV=3	Mus musculus	AATALKDVVK;GSFSEQGINEFLR;GSTAPVGGGSFPTITPR;TGEAIVDAALSALR;VGAVNADKHQSLGGQYGVQGFPTIK;YGIKGFPTIKIFQK	10090	6	6	3	21.1	48.1	76613000	4110800	3789400	5018000	1929200	10569000	4555700	6900000	13973000	7036200	6772900	5534600	6424900	1566600	1721400	2467000	1765400	2954300	1707300	2758600	2661700	2164300	2091000	3470500	2124600
O70400	PDZ and LIM domain protein 1	Pdlim1	sp|O70400|PDLI1_MOUSE PDZ and LIM domain protein 1 OS=Mus musculus OX=10090 GN=Pdlim1 PE=1 SV=4	Mus musculus	GHFFVEDQIYCEK;LVGGKDFEQPLAISR;TTQQIVLQGPGPWGFR;TTQQIVLQGPGPWGFRLVGGKDFEQPLAISR	10090	4	4	2	13.5	35.774	143150000	8040600	12298000	5256400	13600000	10426000	8921000	7279100	5124100	17793000	6480800	32262000	15672000	6050900	6234300	3800200	9273000	5430700	3722700	4048300	3019900	8749600	5551100	11442000	6280400
O70209	PDZ and LIM domain protein 3	Pdlim3	sp|O70209|PDLI3_MOUSE PDZ and LIM domain protein 3 OS=Mus musculus OX=10090 GN=Pdlim3 PE=1 SV=1	Mus musculus	LSGGIDFNQPLVITR;PQNVVLPGPAPWGFR;PQNVVLPGPAPWGFRLSGGIDFNQPLVITR	10090	3	3	2	9.5	34.299	59186000	5644100	2715200	3449500	3550500	8392000	4234300	3905200	5907300	3763600	5781200	4428200	7414700	3273700	1283000	2124800	2293200	3815700	1561800	1829300	2432500	1595900	921610	3612400	2653300
Q8CI51	PDZ and LIM domain protein 5	Pdlim5	sp|Q8CI51|PDLI5_MOUSE PDZ and LIM domain protein 5 OS=Mus musculus OX=10090 GN=Pdlim5 PE=1 SV=4	Mus musculus	SSGTGASVGPPQPSDQDTLVQR	10090	1	1	1	3.7	63.299	23242000	1719100	986530	1176700	0	4037600	3408300	1874100	0	8752900	1287300	0	0	1746200	712420	1290000	0	2437900	1994600	1308700	0	5617900	1161000	0	0
Q3TJD7	PDZ and LIM domain protein 7	Pdlim7	sp|Q3TJD7|PDLI7_MOUSE PDZ and LIM domain protein 7 OS=Mus musculus OX=10090 GN=Pdlim7 PE=1 SV=1	Mus musculus	GAIFCPSCYDVR;LQGGKDFNVPLSISR;VLEEGGFFEEK;VVLEGPAPWGFR	10090	4	4	1	10.9	50.118	87004000	5541700	6695900	4035400	5467400	5246000	8972000	5360900	5634500	8529700	4512800	16082000	10926000	2803600	2704700	2248100	2907200	1932300	3553300	2660500	2519100	2254600	3212500	4152600	2497400
Q8K183	Pyridoxal kinase	Pdxk	sp|Q8K183|PDXK_MOUSE Pyridoxal kinase OS=Mus musculus OX=10090 GN=Pdxk PE=1 SV=1	Mus musculus	DKVVPVADIITPNQFEAELLSGR	10090	1	1	1	7.4	35.015	3669300	0	0	0	0	0	476560	724340	506520	849030	0	1112900	0	0	0	0	0	0	274570	497960	313650	536470	0	600110	0
Q08481	Platelet endothelial cell adhesion molecule	Pecam1	sp|Q08481|PECA1_MOUSE Platelet endothelial cell adhesion molecule OS=Mus musculus OX=10090 GN=Pecam1 PE=1 SV=1	Mus musculus	AKSDFQTLEVTSNDPATFTDKPTR;EGTSPITFQFYK;IAEESDSGEYSCTAGIGK;SDFQTLEVTSNDPATFTDKPTR	10090	4	4	4	7.4	81.262	66257000	1995100	4525100	6254200	3523600	11502000	15634000	460870	4661300	4051400	1660800	5872100	6115700	1974500	584190	4757100	1828700	3791200	3992100	1238900	1581600	2420700	2295900	2611900	2839000
P62962	Profilin-1	Pfn1	sp|P62962|PROF1_MOUSE Profilin-1 OS=Mus musculus OX=10090 GN=Pfn1 PE=1 SV=2	Mus musculus	SSFFVNGLTLGGQK;TFVSITPAEVGVLVGK;TFVSITPAEVGVLVGKDR	10090	3	3	3	22.9	14.957	136160000	4788000	9356200	5727200	4348800	15926000	13173000	11993000	11853000	8415900	13709000	19198000	17676000	4020100	5550700	5229500	4241700	8565000	7658700	6872000	5808800	4914400	8687600	8978100	7430600
P18669	Phosphoglycerate mutase 1	PGAM1	sp|P18669|PGAM1_HUMAN Phosphoglycerate mutase 1 OS=Homo sapiens OX=9606 GN=PGAM1 PE=1 SV=2	Homo sapiens	AAYKLVLIR;ALPFWNEEIVPQIK;MAAYKLVLIRHGESAWNLENR;VLIAAHGNSLR;YADLTEDQLPSCESLKDTIAR	9606	5	5	0	26.4	28.804	228320000	15553000	14138000	10801000	15315000	12766000	42922000	18798000	13912000	18906000	17749000	26024000	21436000	4367800	3442700	5720600	2990100	4711800	8300900	5105600	3727800	5954400	4698200	9744000	5925800
O70250	Phosphoglycerate mutase 2	Pgam2	sp|O70250|PGAM2_MOUSE Phosphoglycerate mutase 2 OS=Mus musculus OX=10090 GN=Pgam2 PE=1 SV=3	Mus musculus	VLIAAHGNSLR;YAGLKPEELPTCESLKDTIAR	10090	2	1	1	12.6	28.827	22462000	0	0	888950	2086300	2760600	0	10122000	0	3416100	0	3187800	0	0	0	1709500	2490500	2382700	0	4626500	0	2576700	0	1862700	0
P00558	Phosphoglycerate kinase 1	PGK1	sp|P00558|PGK1_HUMAN Phosphoglycerate kinase 1 OS=Homo sapiens OX=9606 GN=PGK1 PE=1 SV=3	Homo sapiens	ALESPERPFLAILGGAK;ITLPVDFVTADKFDENAK;LGDVYVNDAFGTAHR;NGVKITLPVDFVTADKFDENAK	9606	4	4	0	12.9	44.614	94583000	0	2317400	3633900	3547800	5157500	14413000	991810	18979000	9817500	5347100	20350000	10029000	0	1404600	3553300	1949800	2789900	2904100	1598400	4312500	3348000	3320200	7560400	3500000
Q8BZF8	Phosphoglucomutase-like protein 5	Pgm5	sp|Q8BZF8|PGM5_MOUSE Phosphoglucomutase-like protein 5 OS=Mus musculus OX=10090 GN=Pgm5 PE=1 SV=2	Mus musculus	DLEALVTDKSFIGQQFAVGSHIYSIAK;FNVANGGPAPDVVSDKIYQISK	10090	2	2	1	8.6	62.219	52748000	1224500	645500	1705100	2084500	2903100	0	5969000	16883000	2722000	3224200	6267000	9120400	1229000	460620	1829300	2022200	1948200	0	4118900	10493000	1440000	2786400	2813900	4002400
O00264	Membrane-associated progesterone receptor component 1	PGRMC1	sp|O00264|PGRC1_HUMAN Membrane-associated progesterone receptor component 1 OS=Homo sapiens OX=9606 GN=PGRMC1 PE=1 SV=3	Homo sapiens	FYGPEGPYGVFAGR;GRKFYGPEGPYGVFAGR;ILMAINGKVFDVTK;KFYGPEGPYGVFAGR	9606	4	4	0	15.9	21.671	109080000	2742300	1457600	6688700	6506300	5530400	18129000	7325400	17544000	5883000	16114000	13720000	7440000	4433400	1675200	3112700	4223500	3844000	4476600	6019600	1911600	3900200	4566300	5789200	3451600
Q8WWQ0	PH-interacting protein	PHIP	sp|Q8WWQ0|PHIP_HUMAN PH-interacting protein OS=Homo sapiens OX=9606 GN=PHIP PE=1 SV=2	Homo sapiens	MSCERKGLSELR	9606	1	1	1	0.7	206.69	6196900	0	0	961280	0	0	0	0	0	0	840190	1852400	2543000	0	0	939630	0	0	0	0	0	0	788440	926490	1421900
Q9DB26	Phytanoyl-CoA dioxygenase domain-containing protein 1	Phyhd1	sp|Q9DB26|PHYD1_MOUSE Phytanoyl-CoA dioxygenase domain-containing protein 1 OS=Mus musculus OX=10090 GN=Phyhd1 PE=1 SV=2	Mus musculus	MACLSPSQLK	10090	1	1	1	3.4	32.517	30733000	1928900	7116100	5561400	0	3502200	0	0	3184000	0	0	0	9440500	2675200	5088000	5665300	0	2032700	0	0	1711600	0	0	0	4997800
P52480	Pyruvate kinase PKM	Pkm	sp|P52480|KPYM_MOUSE Pyruvate kinase PKM OS=Mus musculus OX=10090 GN=Pkm PE=1 SV=4	Mus musculus	AEGSDVANAVLDGADCIMLSGETAKGDYPLEAVR;APIIAVTRNPQTAR;EATESFASDPILYRPVAVALDTK;EATESFASDPILYRPVAVALDTKGPEIR;GADFLVTEVENGGSLGSK;GADFLVTEVENGGSLGSKK;GDLGIEIPAEKVFLAQK;GVNLPGAAVDLPAVSEK;GVNLPGAAVDLPAVSEKDIQDLK;IYVDDGLISLQVK;KGVNLPGAAVDLPAVSEK;KGVNLPGAAVDLPAVSEKDIQDLK;LDIDSAPITAR;LNFSHGTHEYHAETIK;LNFSHGTHEYHAETIKNVR;NTGIICTIGPASR;TGLIKGSGTAEVELKK;YRPRAPIIAVTR	10090	18	18	3	39.7	57.844	1125900000	54165000	66482000	81438000	66756000	63729000	189000000	74911000	104700000	137580000	93691000	71022000	122440000	19979000	16244000	27718000	15652000	10704000	28239000	17610000	20476000	25313000	27172000	19751000	16471000
Q9QXS1	Plectin	Plec	sp|Q9QXS1|PLEC_MOUSE Plectin OS=Mus musculus OX=10090 GN=Plec PE=1 SV=3	Mus musculus	ALVPAAELLDSGVISHELYQQLQR;AQAELEAQELQR;ARNDESQLSPATR;DSQDAGGFGPEDR;EAQAVPATLQELEATK;GGELVYTDTEAR;GYLDKETNR;GYLNKDTHDQLSEPSEVR;IAEQQKAQAEVEGLGKGVAR;IISLETYNLFR;LAAEQELIR;LLDAQLSTGGIVDPSKSHRVPLDVAYAR;LLDPEDVDVPQPDEK;LLFNDVQTLK;LQAEEVAQQK;QTNLENLDQAFSVAER;QVQVALETAQR;RLAEDEAFQR;SDQLTGLSLLPLSEK;SFLSEKDSLLQR;SIQEELQHLRQSSEAEIQAK;SLAQADAEKQKEEAER;SSIAGLLLKPTNEKLSVYTALQR;TLQEEHVTVAQLR;VLALPEPSPAAPTLR;VYH…	10090	26	26	15	8.3	534.18	402820000	28407000	35838000	17688000	24190000	8607500	69424000	55258000	34368000	33550000	47767000	20611000	27114000	6114000	5963100	3908200	4765000	2321900	10562000	7684800	3001200	5329400	9795300	3190800	4787500
Q91VC4	Plasmalemma vesicle-associated protein	Plvap	sp|Q91VC4|PLVAP_MOUSE Plasmalemma vesicle-associated protein OS=Mus musculus OX=10090 GN=Plvap PE=1 SV=1	Mus musculus	QQQEQQVTEENLR	10090	1	1	1	3	49.933	4095700	688090	0	212280	0	413430	476720	549310	655320	353280	747280	0	0	662960	0	226700	0	303380	274430	377310	405450	223040	642860	0	0
Q9R0M4	Podocalyxin	Podxl	sp|Q9R0M4|PODXL_MOUSE Podocalyxin OS=Mus musculus OX=10090 GN=Podxl PE=1 SV=2	Mus musculus	ASFKPAEDLCTLHVAPILDNQAVAVKR;KVVNLNGELGDSWIVPLDNLTKDDLDEEEDTHL	10090	2	2	2	11.9	53.389	4900100	0	0	0	0	0	0	0	0	832490	0	4067600	0	0	0	0	0	0	0	0	0	1236800	0	1040200	0
P01193	Pro-opiomelanocortin	Pomc	sp|P01193|COLI_MOUSE Pro-opiomelanocortin OS=Mus musculus OX=10090 GN=Pomc PE=1 SV=1	Mus musculus	ACKLDLSLETPVFPGNGDEQPLTENPR;AEEEAVWGDGSPEPSPR	10090	2	2	2	18.7	26.707	10377000	0	0	0	0	10377000	0	0	0	0	0	0	0	0	0	0	0	0	0	0	0	0	0	0	0
Q62087	Serum paraoxonase/lactonase 3	Pon3	sp|Q62087|PON3_MOUSE Serum paraoxonase/lactonase 3 OS=Mus musculus OX=10090 GN=Pon3 PE=1 SV=2	Mus musculus	LLIYNPEDPPGSEVLR	10090	1	1	1	4.5	39.351	18059000	640690	2415600	1075500	451740	0	1648800	1295500	979460	3396800	2568600	1968200	1618100	650110	1742600	1166500	477740	0	953370	903700	615440	1967600	2244100	1077000	856610
Q62009	Periostin	Postn	sp|Q62009|POSTN_MOUSE Periostin OS=Mus musculus OX=10090 GN=Postn PE=1 SV=2	Mus musculus	AAAITSDLLESLGR;DGHFTLFAPTNEAFEKLPR;DQGPNVCALQQILGTK;ELLIGDKNALQNIILYHLTPGVYIGK;GSYTYFAPSNEAWENLDSDIRR;ISTGGGETGETLQK;NGAIHIFR;NGVIHLIDEVLIPDSAK	10090	8	8	5	16.2	93.142	200620000	17506000	2721600	7680200	13080000	39199000	14703000	21487000	11336000	27917000	7704200	23888000	13394000	6025200	1080400	4913900	4344700	11890000	7396400	6605700	4658500	6351600	3640100	6119100	4606700
O75334	Liprin-alpha-2	PPFIA2	sp|O75334|LIPA2_HUMAN Liprin-alpha-2 OS=Homo sapiens OX=9606 GN=PPFIA2 PE=1 SV=2	Homo sapiens	EYNNLLALGTERR;MGVRRDEPK	9606	2	2	0	1.8	143.29	23529000	1013500	655770	338610	580320	1027300	963600	18639000	0	0	311250	0	0	2723200	1847000	1627300	2025900	2241800	2118900	2124800	0	0	1400300	0	0
P17742	Peptidyl-prolyl cis-trans isomerase A	Ppia	sp|P17742|PPIA_MOUSE Peptidyl-prolyl cis-trans isomerase A OS=Mus musculus OX=10090 GN=Ppia PE=1 SV=2	Mus musculus	ALSTGEKGFGYK;FEDENFILK;GFGYKGSSFHR;KITISDCGQL;SIYGEKFEDENFILK;VNPTVFFDITADDEPLGR;VSFELFADKVPK;VSFELFADKVPKTAENFR	10090	8	8	3	48.2	17.971	567160000	46983000	26643000	36566000	17954000	47263000	33683000	25416000	66053000	70638000	15633000	103990000	76341000	19815000	7118100	12480000	7618400	13700000	7234400	8571900	16935000	17141000	6263500	20571000	14434000
P62136	Serine/threonine-protein phosphatase PP1-alpha catalytic subunit	PPP1CA	sp|P62136|PP1A_HUMAN Serine/threonine-protein phosphatase PP1-alpha catalytic subunit OS=Homo sapiens OX=9606 GN=PPP1CA PE=1 SV=1	Homo sapiens	SDSEKLNLDSIIGR	9606	1	1	0	4.2	37.512	8349000	0	0	0	0	0	1921600	2065100	0	714970	941550	1345400	1360400	0	0	0	0	0	1070800	1256800	0	436950	865020	803320	791610
P62140	Serine/threonine-protein phosphatase PP1-beta catalytic subunit	PPP1CB	sp|P62140|PP1B_HUMAN Serine/threonine-protein phosphatase PP1-beta catalytic subunit OS=Homo sapiens OX=9606 GN=PPP1CB PE=1 SV=3	Homo sapiens	ADGELNVDSLITR	9606	1	1	0	4	37.186	14692000	1839500	691660	917990	569610	1258000	895170	1100200	1176200	1818000	1385800	1299000	1740600	1983600	544850	914730	593680	906980	564690	752540	731540	1029600	1059300	710460	863120
P63330	Serine/threonine-protein phosphatase 2A catalytic subunit alpha isoform	Ppp2ca	sp|P63330|PP2AA_MOUSE Serine/threonine-protein phosphatase 2A catalytic subunit alpha isoform OS=Mus musculus OX=10090 GN=Ppp2ca PE=1 SV=1;sp|P62715|PP2AB_MOUSE Serine/threonine-protein phosphatase 2A catalytic subunit beta isoform OS=Mus musculus OX=10090	Mus musculus	GAGYTFGQDISETFNHANGLTLVSR;LFTKELDQWIEQLNECK	10090	2	2	1	13.6	35.608	92160000	0	2542300	3624900	12892000	7482400	2514300	0	2138500	10975000	13933000	8932100	27126000	0	3118900	6685800	9624000	8632700	2499700	0	2285100	3183300	4739600	8311600	4457800
E7EU14	Protein PPP5D1	PPP5D1	sp|E7EU14|PP5D1_HUMAN Protein PPP5D1 OS=Homo sapiens OX=9606 GN=PPP5D1 PE=2 SV=2	Homo sapiens	AEMRAWRPLVRPSLQCVK	9606	1	1	1	10.5	19.623	2336500	0	0	0	428980	0	0	1907500	0	0	0	0	0	0	0	0	414620	0	0	1311400	0	0	0	0	0
O88531	Palmitoyl-protein thioesterase 1	Ppt1	sp|O88531|PPT1_MOUSE Palmitoyl-protein thioesterase 1 OS=Mus musculus OX=10090 GN=Ppt1 PE=1 SV=2	Mus musculus	LQQGYNAIGFSQGGQFLR	10090	1	1	1	5.9	34.49	3937900	425060	0	416870	239530	0	0	1560600	0	1295800	0	0	0	535600	0	468650	395280	0	0	850940	0	743370	0	0	0
O60831	PRA1 family protein 2	PRAF2	sp|O60831|PRAF2_HUMAN PRA1 family protein 2 OS=Homo sapiens OX=9606 GN=PRAF2 PE=1 SV=1	Homo sapiens	SEVRLPPLRALDDFVLGSAR	9606	1	1	0	11.2	19.258	23959000	0	3472900	0	1300500	4858400	4217200	3179300	0	2032700	1744700	1226400	1926500	0	2241800	0	1274600	3293700	2463700	2216300	0	1302400	1523200	707940	1019100
Q61171	Peroxiredoxin-2	Prdx2	sp|Q61171|PRDX2_MOUSE Peroxiredoxin-2 OS=Mus musculus OX=10090 GN=Prdx2 PE=1 SV=3	Mus musculus	ASGNAQIGKSAPDFTATAVVDGAFKEIK;EGGLGPLNIPLLADVTK;GLFIIDAKGVLRQITVNDLPVGR;KEGGLGPLNIPLLADVTK;QITVNDLPVGR;SAPDFTATAVVDGAFKEIK;SLSQNYGVLKNDEGIAYR	10090	7	7	6	43.9	21.778	121620000	9562400	7420000	12354000	4411200	12318000	3873100	9034900	14446000	20237000	5347600	13354000	9258600	5186900	1749700	5035600	2705000	3744600	2999600	2507200	3017400	2673400	6448500	2677500	1791000
P20108	Thioredoxin-dependent peroxide reductase, mitochondrial	Prdx3	sp|P20108|PRDX3_MOUSE Thioredoxin-dependent peroxide reductase, mitochondrial OS=Mus musculus OX=10090 GN=Prdx3 PE=1 SV=1	Mus musculus	DYGVLLESAGIALR;GLFIIDPNGVVKHLSVNDLPVGR;HLSVNDLPVGR	10090	3	3	2	14.4	28.127	49070000	1358200	1359800	4606400	1548600	4159100	656830	4539000	9412200	5697500	3469500	5020100	7243000	1630800	805960	2797200	1797100	1104400	454380	1399500	3475800	4322600	1914600	3056700	1650300
Q13162	Peroxiredoxin-4	PRDX4	sp|Q13162|PRDX4_HUMAN Peroxiredoxin-4 OS=Homo sapiens OX=9606 GN=PRDX4 PE=1 SV=1	Homo sapiens	GLFIIDDKGILR;GLFIIDDKGILRQITLNDLPVGR;QITLNDLPVGR	9606	3	3	1	8.5	30.54	81092000	3390200	5435000	5981900	6598500	5992700	1710600	8893400	5304500	8421500	2978100	15041000	11345000	2897400	3137800	2587400	2689500	2402300	1562200	2662000	2367200	1978400	921010	3216500	2450700
O08709	Peroxiredoxin-6	Prdx6	sp|O08709|PRDX6_MOUSE Peroxiredoxin-6 OS=Mus musculus OX=10090 GN=Prdx6 PE=1 SV=3	Mus musculus	DFTPVCTTELGR;FHDFLGDSWGILFSHPR;PGGLLLGDEAPNFEANTTIGR;PGGLLLGDEAPNFEANTTIGRIR	10090	4	4	2	23.2	24.87	124920000	4057300	4692400	8961600	3097600	4916200	17649000	21745000	8763500	5917500	16075000	14838000	14206000	1631400	1511300	3306700	1443000	1189400	4474700	6037700	2282800	1239800	4629600	2986700	2454500
Q9JK53	Prolargin	Prelp	sp|Q9JK53|PRELP_MOUSE Prolargin OS=Mus musculus OX=10090 GN=Prelp PE=1 SV=2	Mus musculus	ECYCPPDFPSALYCDSR;IETIPNGYFKDFPNLAFIR;IPPGVFSKLENLLLLDLQHNR;LENLLLLDLQHNR;LSQNLISR;LSQNLISRIPPGVFSK;NLEQLRLSQNLISR;NLEQLRLSQNLISRIPPGVFSK;NQLEEVPSALPR;RVPVIPPR;WVNLDNNR;WVNLDNNRIR	10090	12	12	8	26.7	43.292	940190000	81700000	64866000	64137000	119880000	85988000	48245000	60982000	75222000	62124000	64006000	79956000	133090000	19807000	18643000	27802000	14515000	18766000	20283000	19244000	15743000	15924000	20634000	18789000	22417000
Q91VJ2	Protein kinase C delta-binding protein	Prkcdbp	sp|Q91VJ2|CAVN3_MOUSE Caveolae-associated protein 3 OS=Mus musculus OX=10090 GN=Cavin3 PE=1 SV=1	Mus musculus	GESALEPGPVPETPAGGPVHAVTVVTLLEK;RIQSGLGALSR;SHDTTSNTLTQLLAK	10090	3	3	2	21.5	27.853	60230000	1747900	5097600	730130	9340300	5774500	1060700	1295800	4707400	12161000	2408500	5597300	10308000	2312400	4877600	1180900	3999700	1893400	2646800	907760	1075300	3407100	1362900	1440500	5899500
Q922H1	Protein arginine N-methyltransferase 3	Prmt3	sp|Q922H1|ANM3_MOUSE Protein arginine N-methyltransferase 3 OS=Mus musculus OX=10090 GN=Prmt3 PE=1 SV=2	Mus musculus	MKQFAQDFVMNVDVR	10090	1	1	1	2.8	59.902	2918300	0	0	0	0	0	0	0	0	0	0	2918300	0	0	0	0	0	0	0	0	0	0	0	0	0
P15331	Peripherin	Prph	sp|P15331|PERI_MOUSE Peripherin OS=Mus musculus OX=10090 GN=Prph PE=1 SV=2	Mus musculus	ADQLCQQELR;DGLAEDLAALKQR;DGLAEDLAALKQRLEEETR;DRVQVER;ELELLGRER;FLEQQNAALR;FLEQQNAALRGELSQAR;GQEPARADQLCQQELR;KLLEGEESR;LLEGEESR;LLGSGSPSSSAR;NLQEAEEWYK;NLQEAEEWYKSK;SNEKQELQELNDR;SNEKQELQELNDRFANFIEK;VRFLEQQNAALRGELSQAR	10090	16	12	1	25.9	54.267	547250000	39994000	35325000	50028000	26486000	44542000	56837000	57755000	39172000	88635000	21034000	23093000	64349000	12896000	10182000	13745000	9487400	9635100	12987000	14468000	12704000	12900000	5294500	5760700	11852000
P35030	Trypsin-3	PRSS3	sp|P35030|TRY3_HUMAN Trypsin-3 OS=Homo sapiens OX=9606 GN=PRSS3 PE=1 SV=2	Homo sapiens	VLEGNEQFINAAK	9606	1	1	1	4.3	32.528	71518000	3809100	1873600	6303200	1740300	10210000	2825300	3465200	14032000	14234000	3650600	4379600	4996000	3690800	1290700	6527700	1629800	6614000	1577200	2308200	9200000	9492800	3045500	2288300	2525400
Q8NHM4	Putative trypsin-6	PRSS3P2	sp|Q8NHM4|TRY6_HUMAN Putative trypsin-6 OS=Homo sapiens OX=9606 GN=PRSS3P2 PE=5 SV=2;sp|P07478|TRY2_HUMAN Trypsin-2 OS=Homo sapiens OX=9606 GN=PRSS2 PE=1 SV=1;sp|P07477|TRY1_HUMAN Trypsin-1 OS=Homo sapiens OX=9606 GN=PRSS1 PE=1 SV=1	Homo sapiens	LGEHNIEVLEGNEQFINAAK	9606	1	1	1	8.1	26.537	102280000	1907100	7746300	3510200	5535300	2120600	16431000	9063000	1584900	8844900	12408000	15182000	17943000	2360900	7146500	2365400	3263300	1839900	5025500	2872600	1215000	3274100	6867800	5927200	6653900
O55103	Periaxin	Prx	sp|O55103|PRAX_MOUSE Periaxin OS=Mus musculus OX=10090 GN=Prx PE=1 SV=1	Mus musculus	AEAEAATGAGFTAPQIELVGPRLPSAEVGVPQVSVPK;GEGVEPQGPEAQR;LPKVPEAAIPDVQLPEVQLPK;LPSAEVGVPQVSVPK;SEGGIKLKLPTLGTGSR;SLSLQEGDQLLSAR;VAVGVGEVGFRVPSVEIVTPQLPTVEVEK;VPEAAIPDVQLPEVQLPK	10090	8	8	7	9.4	147.69	329620000	25472000	22331000	13371000	17073000	14325000	34632000	33037000	22646000	48908000	45753000	13505000	38568000	12886000	8292900	8572300	9979400	10326000	10292000	8873900	8607900	11520000	15489000	4403400	10316000
O35074	Prostacyclin synthase	Ptgis	sp|O35074|PTGIS_MOUSE Prostacyclin synthase OS=Mus musculus OX=10090 GN=Ptgis PE=1 SV=1	Mus musculus	DLQALTEAMYTNLR;IFDLQLPNFNPSEEK;LLLFPFLSPQKDPEIYTEPEVFKYNR;RPGEPPLDLGSIPWLGHALEFGR	10090	4	4	4	15.6	57.046	44694000	532070	744310	295950	2421700	3346200	4843000	3125600	2231600	2329200	2056600	13562000	9206400	1485700	1479600	1707500	1875600	1448600	2161400	1381300	1298300	1250000	1663600	3869000	2722800
P06454	Prothymosin alpha	PTMA	sp|P06454|PTMA_HUMAN Prothymosin alpha OS=Homo sapiens OX=9606 GN=PTMA PE=1 SV=2	Homo sapiens	EVVEEAENGR;SDAAVDTSSEITTKDLK	9606	2	2	0	24.3	12.203	53991000	3026100	3514100	5100100	4644200	871960	14078000	3766400	2756300	1174900	9372500	2173100	3514000	3019500	2492900	2896500	3812400	581710	5249000	2583700	1703000	740770	8052200	1169300	1829300
P20962	Parathymosin	PTMS	sp|P20962|PTMS_HUMAN Parathymosin OS=Homo sapiens OX=9606 GN=PTMS PE=1 SV=2	Homo sapiens	SEKSVEAAAELSAK;SEKSVEAAAELSAKDLK	9606	2	2	0	16.7	11.53	26314000	2056800	1933100	2337600	934120	2394700	5708900	1125600	3575100	2898100	1122200	2227700	0	1631700	1530600	2782700	419250	557030	1992700	861820	996680	1215200	1076100	910440	0
P28827	Receptor-type tyrosine-protein phosphatase mu	PTPRM	sp|P28827|PTPRM_HUMAN Receptor-type tyrosine-protein phosphatase mu OS=Homo sapiens OX=9606 GN=PTPRM PE=1 SV=2	Homo sapiens	TGCFIVIDIMLDMAER	9606	1	1	0	1.1	163.68	68291000	1984200	7670200	7731400	8786900	6674900	12747000	6229100	8163400	0	0	4169200	4135000	2275800	4465100	10680000	5999400	3906700	9491400	3800700	4245100	0	0	2473400	2406200
O54724	Polymerase I and transcript release factor	Ptrf	sp|O54724|CAVN1_MOUSE Caveolae-associated protein 1 OS=Mus musculus OX=10090 GN=Cavin1 PE=1 SV=1	Mus musculus	ATEEPSGTGSDELIK;ATEEPSGTGSDELIKSDQVNGVLVLSLLDK;IIGAVDQIQLTQAQLEER;KLEVNEAELLR;QAEMEGAVQSIQGELSK;QAEMEGAVQSIQGELSKLGK;SDQVNGVLVLSLLDK;SLKESEALPEK	10090	8	8	2	23	43.953	459490000	38183000	37323000	19910000	53952000	51809000	30157000	22179000	38788000	48453000	13904000	43925000	60910000	21864000	10292000	12797000	10487000	11579000	10818000	5725300	7775400	9488000	5229400	6766600	11065000
O35295	Transcriptional activator protein Pur-beta	Purb	sp|O35295|PURB_MOUSE Transcriptional activator protein Pur-beta OS=Mus musculus OX=10090 GN=Purb PE=1 SV=3	Mus musculus	GGGGGGGGPGGEQETQELASK	10090	1	1	1	6.5	33.901	13830000	0	0	1082700	0	2220700	3424800	2748200	2596200	1086000	0	671010	0	0	0	1338900	0	1516500	1748300	1710700	1578000	1031000	0	236890	0
P32848	Parvalbumin alpha	Pvalb	sp|P32848|PRVA_MOUSE Parvalbumin alpha OS=Mus musculus OX=10090 GN=Pvalb PE=1 SV=3	Mus musculus	SGFIEEDELGSILK;SGFIEEDELGSILKGFSSDAR;SMTDVLSAEDIKK;TLLAAGDKDGDGKIGVEEFSTLVAES	10090	4	4	4	54.5	11.93	229910000	27632000	25099000	8800400	4365500	32700000	34244000	6551300	12695000	11760000	11412000	40739000	13910000	19737000	9099300	5472800	3131400	13144000	20921000	4628000	6852100	4584100	6487500	14889000	4807300
Q9WUB3	Glycogen phosphorylase, muscle form	Pygm	sp|Q9WUB3|PYGM_MOUSE Glycogen phosphorylase, muscle form OS=Mus musculus OX=10090 GN=Pygm PE=1 SV=3	Mus musculus	ARPEFTLPVHFYGR;DYYFALAHTVR;NIATSGKFSSDR;QIIEQLSSGFFSPK;SRPLSDQDKR;WLVLCNPGLAEVIAER	10090	6	6	3	9.1	97.285	52777000	3126100	1697500	2978100	4689700	5387100	3452400	9867500	57274	7125400	3867300	7708700	2819800	1903200	922600	2026000	2295700	3034000	1410200	5286800	337950	2700000	2153900	1761500	1013300
Q8BML9	Glutamine--tRNA ligase	Qars	sp|Q8BML9|SYQ_MOUSE Glutamine--tRNA ligase OS=Mus musculus OX=10090 GN=Qars1 PE=1 SV=1	Mus musculus	ATPDSLALFTGLGLSENKAR	10090	1	1	1	2.6	87.676	4810900	0	401430	0	188770	592770	609540	1290600	0	936680	0	791120	0	0	290060	0	187480	402800	356930	901780	0	601540	0	380500	0
P61026	Ras-related protein Rab-10	RAB10	sp|P61026|RAB10_HUMAN Ras-related protein Rab-10 OS=Homo sapiens OX=9606 GN=RAB10 PE=1 SV=1	Homo sapiens	AFLTLAEDILR;NIDEHANEDVER	9606	2	2	0	11.5	22.541	18239000	0	2781600	246430	1367000	344710	1043400	1901100	2869100	2109700	925300	2566000	2085100	0	905670	664480	526680	581420	623040	786570	2273700	719900	556540	1426900	650330
P62492	Ras-related protein Rab-11A	Rab11a	sp|P62492|RB11A_MOUSE Ras-related protein Rab-11A OS=Mus musculus OX=10090 GN=Rab11a PE=1 SV=3;sp|P46638|RB11B_MOUSE Ras-related protein Rab-11B OS=Mus musculus OX=10090 GN=Rab11b PE=1 SV=3	Mus musculus	AQIWDTAGQER;FTRNEFNLESK;GTRDDEYDYLFK	10090	3	3	0	15.7	24.393	40942000	0	538780	2239000	1550500	5546700	2772100	1591800	3239900	12450000	773750	4072900	6166400	0	687500	2076800	1220000	3363500	1535600	1005600	1583700	2602200	991800	2109800	1196400
P61106	Ras-related protein Rab-14	RAB14	sp|P61106|RAB14_HUMAN Ras-related protein Rab-14 OS=Homo sapiens OX=9606 GN=RAB14 PE=1 SV=4	Homo sapiens	QFAEENGLLFLEASAK;TGENVEDAFLEAAK	9606	2	2	0	14	23.897	14377000	0	320700	947330	0	830100	1407300	1784500	3726200	2263100	478500	1302400	1316800	0	440520	1190200	0	797140	480380	570440	985790	366140	653540	932580	918960
P62820	Ras-related protein Rab-1A	RAB1A	sp|P62820|RAB1A_HUMAN Ras-related protein Rab-1A OS=Homo sapiens OX=9606 GN=RAB1A PE=1 SV=3;sp|Q9H0U4|RAB1B_HUMAN Ras-related protein Rab-1B OS=Homo sapiens OX=9606 GN=RAB1B PE=1 SV=1;sp|Q92928|RAB1C_HUMAN Putative Ras-related protein Rab-1C OS=Homo sapien	Homo sapiens	EFADSLGIPFLETSAK;KVVDYTTAKEFADSLGIPFLETSAK	9606	2	2	0	12.2	22.677	19781000	386970	1812800	1092000	0	1429400	3877400	912240	2824700	2030200	607150	2143000	2664800	478290	1519800	1376500	0	1127000	561640	739600	876630	1512800	622290	1245700	1464500
Q9D1G1	Ras-related protein Rab-1B	Rab1b	sp|Q9D1G1|RAB1B_MOUSE Ras-related protein Rab-1B OS=Mus musculus OX=10090 GN=Rab1b PE=1 SV=1	Mus musculus	EFADSLGVPFLETSAK;KVVDNTTAKEFADSLGVPFLETSAK	10090	2	2	2	12.4	22.187	23448000	274850	5903300	1879000	640350	1477300	2698100	0	658710	2855200	902510	3006900	3152000	560920	949490	1319800	1210700	1173700	1334000	0	683320	1613300	777690	1358600	1216000
P53994	Ras-related protein Rab-2A	Rab2a	sp|P53994|RAB2A_MOUSE Ras-related protein Rab-2A OS=Mus musculus OX=10090 GN=Rab2a PE=1 SV=1	Mus musculus	IQEGVFDINNEANGIK;TASNVEEAFINTAK;TASNVEEAFINTAKEIYEK	10090	3	3	0	16.5	23.547	44489000	2895800	8808500	3356600	1432700	4101400	3167000	4641600	3314100	4312800	3594900	4864100	0	1377400	4071300	1583500	1416600	1298900	1362100	2211000	1559000	2039600	2258000	1570700	0
P51149	Ras-related protein Rab-7a	RAB7A	sp|P51149|RAB7A_HUMAN Ras-related protein Rab-7a OS=Homo sapiens OX=9606 GN=RAB7A PE=1 SV=1	Homo sapiens	DPENFPFVVLGNK;DPENFPFVVLGNKIDLENR;EAINVEQAFQTIAR	9606	3	3	0	15.9	23.489	91022000	4854300	11981000	10372000	2873600	6346500	8676000	9157000	11019000	298860	5670400	9956600	9815800	4821800	5691500	6619300	2405200	3635400	4965200	4255500	4754800	0	4849600	3571700	4617900
A6NIZ1	Ras-related protein Rap-1b-like protein	RAP1B	sp|A6NIZ1|RP1BL_HUMAN Ras-related protein Rap-1b-like protein OS=Homo sapiens OX=9606 PE=2 SV=1;sp|P61224|RAP1B_HUMAN Ras-related protein Rap-1b OS=Homo sapiens OX=9606 GN=RAP1B PE=1 SV=1;sp|P62834|RAP1A_HUMAN Ras-related protein Rap-1A OS=Homo sapiens OX=	Homo sapiens	INVNEIFYDLVR;QWNNCAFLESSAK;SKINVNEIFYDLVR;VVGKEQGQNLAR	9606	4	4	0	21.2	20.925	156870000	2975400	17025000	4726300	3331100	9225000	36881000	12176000	14720000	12396000	15987000	10531000	16892000	2305300	10330000	5067700	3229900	3770100	16422000	8397300	8643000	5490700	6262000	4937400	5981800
Q09028	Histone-binding protein RBBP4	RBBP4	sp|Q09028|RBBP4_HUMAN Histone-binding protein RBBP4 OS=Homo sapiens OX=9606 GN=RBBP4 PE=1 SV=3;sp|Q16576|RBBP7_HUMAN Histone-binding protein RBBP7 OS=Homo sapiens OX=9606 GN=RBBP7 PE=1 SV=1	Homo sapiens	ADKEAAFDDAVEER;RLNVWDLSK	9606	2	2	0	5.4	47.655	22923000	596800	1217400	724330	858920	1424700	1676900	1115600	1049800	7211100	1059800	4424300	1563800	569760	826250	739110	792560	909400	922360	732200	620640	4700400	871140	2610200	778900
Q96E39	RNA binding motif protein, X-linked-like-1	RBMXL1	sp|Q96E39|RMXL1_HUMAN RNA binding motif protein, X-linked-like-1 OS=Homo sapiens OX=9606 GN=RBMXL1 PE=1 SV=1;sp|P38159|RBMX_HUMAN RNA-binding motif protein, X chromosome OS=Homo sapiens OX=9606 GN=RBMX PE=1 SV=3	Homo sapiens	VEADRPGKLFIGGLNTETNEK	9606	1	1	0	5.4	42.141	28458000	4844900	7276900	2389900	759630	0	2857900	2919400	0	2219600	998480	2169900	2021300	4844900	5173500	2554400	734210	0	1646500	2007000	0	1402500	859710	1170100	1054500
Q14257	Reticulocalbin-2	RCN2	sp|Q14257|RCN2_HUMAN Reticulocalbin-2 OS=Homo sapiens OX=9606 GN=RCN2 PE=1 SV=1	Homo sapiens	EALLGVQEDVDEYVK;QLHDDYFYHDEL	9606	2	2	0	8.5	36.876	16449000	1377100	0	1711500	540130	739330	2346300	975150	1915300	0	2740200	1802400	2302000	1369400	0	1306400	519130	0	995740	666640	1179400	0	2306000	966510	888870
Q8BH97	Reticulocalbin-3	Rcn3	sp|Q8BH97|RCN3_MOUSE Reticulocalbin-3 OS=Mus musculus OX=10090 GN=Rcn3 PE=1 SV=1	Mus musculus	AWIAHTQQR;EFDKLSPEESQAR	10090	2	2	1	6.7	38.001	11360000	0	230280	3540000	0	1950600	0	0	2984100	1442100	0	0	1213200	0	383510	3111700	0	1529700	0	0	1929800	996580	0	0	692250
Q9DC04	Regulator of G-protein signaling 3	Rgs3	sp|Q9DC04|RGS3_MOUSE Regulator of G-protein signaling 3 OS=Mus musculus OX=10090 GN=Rgs3 PE=1 SV=2	Mus musculus	KMFETEADEKEMPLVEGK	10090	1	1	1	1.9	106.22	159670000	0	0	0	0	13139000	0	0	0	21371000	82010000	0	43149000	0	0	0	0	7914900	0	0	0	10542000	73517000	0	23438000
Q9H4K1	RIB43A-like with coiled-coils protein 2	RIBC2	sp|Q9H4K1|RIBC2_HUMAN RIB43A-like with coiled-coils protein 2 OS=Homo sapiens OX=9606 GN=RIBC2 PE=1 SV=2	Homo sapiens	IMCILENR	9606	1	1	1	2.1	45.427	21402000	384870	3284100	880510	240770	2118800	3476100	1073500	2407000	1833900	2774200	1168400	1760000	690080	1699700	1079100	536610	1878100	1574200	955590	1358000	1197400	1719200	882960	1065900
P53026	60S ribosomal protein L10a	Rpl10a	sp|P53026|RL10A_MOUSE 60S ribosomal protein L10a OS=Mus musculus OX=10090 GN=Rpl10a PE=1 SV=3	Mus musculus	KYDAFLASESLIK;KYDAFLASESLIKQIPR	10090	2	2	0	7.8	24.916	27993000	0	758200	550840	461970	1067000	9162600	3055500	5169000	2039300	717940	2121600	2889100	0	777790	874700	686030	937580	3275700	1926100	1411100	825320	852160	1284600	1543800
P30050	60S ribosomal protein L12	RPL12	sp|P30050|RL12_HUMAN 60S ribosomal protein L12 OS=Homo sapiens OX=9606 GN=RPL12 PE=1 SV=1	Homo sapiens	CTGGEVGATSALAPK;QAQIEVVPSASALIIK	9606	2	2	0	18.8	17.818	14108000	788500	1898100	509100	3097500	692420	1192200	793160	1354000	1193000	0	1424600	1165400	974090	571260	765150	1936100	683000	888460	761750	1014800	1060000	0	496790	819100
P35980	60S ribosomal protein L18	Rpl18	sp|P35980|RL18_MOUSE 60S ribosomal protein L18 OS=Mus musculus OX=10090 GN=Rpl18 PE=1 SV=3	Mus musculus	ILTFDQLALESPK;TNRPPLSLSR	10090	2	2	1	12.2	21.644	15900000	0	485450	2216600	0	0	7846600	1252100	398480	0	482230	1251200	1967400	0	656630	824770	0	0	3226400	385040	401790	0	593610	428930	824570
P46777	60S ribosomal protein L5	RPL5	sp|P46777|RL5_HUMAN 60S ribosomal protein L5 OS=Homo sapiens OX=9606 GN=RPL5 PE=1 SV=3	Homo sapiens	GAVDGGLSIPHSTK;RFPGYDSESK;TTTGNKVFGALK;TTTGNKVFGALKGAVDGGLSIPHSTK;VGLTNYAAAYCTGLLLAR;VGLTNYAAAYCTGLLLARR	9606	6	6	0	18.5	34.362	71597000	0	0	7158600	1905700	2227800	28544000	1993000	4531800	3306200	759480	10346000	10825000	0	0	2073000	896910	886010	2622200	873550	1645900	5480100	494460	5447100	3628800
P47955	60S acidic ribosomal protein P1	Rplp1	sp|P47955|RLA1_MOUSE 60S acidic ribosomal protein P1 OS=Mus musculus OX=10090 GN=Rplp1 PE=1 SV=1	Mus musculus	AAGVSVEPFWPGLFAK	10090	1	1	1	14	11.475	76960000	1824400	6317700	3281900	4430300	7198600	17053000	6063400	5817100	4522900	5007200	7245000	8198600	1824400	4491500	3507800	4282000	4812900	9825000	4168400	3602200	2857900	4311300	3906900	4277300
Q91YQ5	Dolichyl-diphosphooligosaccharide--protein glycosyltransferase subunit 1	Rpn1	sp|Q91YQ5|RPN1_MOUSE Dolichyl-diphosphooligosaccharide--protein glycosyltransferase subunit 1 OS=Mus musculus OX=10090 GN=Rpn1 PE=1 SV=1	Mus musculus	ASSFVLALEPELESR;SEDVLDYGPFKDIPAYSQDTFK;SLETEHKAVTSEIAVLQSR;TILPAAAQDVYYR;YDYQRQPDSGISSIR	10090	5	5	3	13.8	68.527	113740000	2605100	16397000	2705900	1617700	2397100	8419400	11054000	13740000	10073000	28113000	8468900	8153900	2835000	4136100	3817900	1946400	3044900	4316300	8257400	5955400	4556000	5591300	3808400	4327900
Q9DBG6	Dolichyl-diphosphooligosaccharide--protein glycosyltransferase subunit 2	Rpn2	sp|Q9DBG6|RPN2_MOUSE Dolichyl-diphosphooligosaccharide--protein glycosyltransferase subunit 2 OS=Mus musculus OX=10090 GN=Rpn2 PE=1 SV=1	Mus musculus	LQVSNVLSQPLAQAAVK;YHVPVVVVPEGSTSDTQEQAILR	10090	2	2	2	6.3	69.062	26224000	0	1290400	818740	3183600	1946100	5731000	2774900	2415800	2584900	935920	1436100	3106400	0	1316500	1275700	2174800	695850	1747800	1256200	1823800	703720	460310	1175800	1057900
P62269	40S ribosomal protein S18	RPS18	sp|P62269|RS18_HUMAN 40S ribosomal protein S18 OS=Homo sapiens OX=9606 GN=RPS18 PE=1 SV=3	Homo sapiens	AGELTEDEVER;RAGELTEDEVER	9606	2	2	0	7.9	17.718	76884000	7691600	5157800	4693400	16831000	8543300	2297100	4074700	5596300	5036900	4462600	4185300	8313900	7760200	3699600	3987600	12927000	4398300	1335200	1959500	2858800	2395400	3876600	2277000	3379200
P23396	40S ribosomal protein S3	RPS3	sp|P23396|RS3_HUMAN 40S ribosomal protein S3 OS=Homo sapiens OX=9606 GN=RPS3 PE=1 SV=2	Homo sapiens	ELAEDGYSGVEVR	9606	1	1	0	5.3	26.688	23903000	1581700	1875900	1418300	1469100	1052600	3659400	3486200	970710	1134000	2435700	2343000	2476600	1581700	1333600	1515900	1419900	703740	2108300	2396700	601100	716510	2097200	1263400	1292000
P97461	40S ribosomal protein S5	Rps5	sp|P97461|RS5_MOUSE 40S ribosomal protein S5 OS=Mus musculus OX=10090 GN=Rps5 PE=1 SV=3	Mus musculus	TEWEAATPAVAETPDIKLFGK	10090	1	1	1	10.3	22.889	32626000	1793900	3760200	1801200	614330	4014200	6660500	2192400	3746000	3921600	0	2212200	1909700	1793900	2673300	1925200	593780	2683900	3837400	1507200	2319700	2478000	0	1192900	996310
P08865	40S ribosomal protein SA	RPSA	sp|P08865|RSSA_HUMAN 40S ribosomal protein SA OS=Homo sapiens OX=9606 GN=RPSA PE=1 SV=4	Homo sapiens	ADHQPLTEASYVNLPTIALCNTDSPLR;AIVAIENPADVSVISSR;AVLKFAAATGATPIAGR;SGALDVLQMKEEDVLK	9606	4	4	0	26.1	32.854	32228000	1234000	1073100	3967300	200170	4967900	783490	3266600	2046700	8742500	1099000	3409300	1438300	1595100	830640	1770100	451530	1076900	488940	3302800	0	1774200	2208400	1011300	0
P10833	Ras-related protein R-Ras	Rras	sp|P10833|RRAS_MOUSE Ras-related protein R-Ras OS=Mus musculus OX=10090 GN=Rras PE=1 SV=1	Mus musculus	DRDDFPIVLVGNKADLENQR;LNVDEAFEQLVR;LRLNVDEAFEQLVR	10090	3	3	1	15.6	23.764	23393000	2093600	0	1372800	575470	2040300	0	1158600	3143000	2903300	672820	4770700	4662500	1287000	0	1449800	334710	846670	0	768960	1240200	955990	695310	1629700	1263600
Q99PL5	Ribosome-binding protein 1	Rrbp1	sp|Q99PL5|RRBP1_MOUSE Ribosome-binding protein 1 OS=Mus musculus OX=10090 GN=Rrbp1 PE=1 SV=2	Mus musculus	AENSQLTER;TLQEQLENGPNTQLAR	10090	2	2	0	1.6	172.88	10753000	1717900	1211200	422040	0	0	4878200	0	0	0	1993600	0	530500	2762700	765200	1132900	0	0	725670	0	0	0	1090400	0	478150
Q9Y3I0	tRNA-splicing ligase RtcB homolog	RTCB	sp|Q9Y3I0|RTCB_HUMAN RNA-splicing ligase RtcB homolog OS=Homo sapiens OX=9606 GN=RTCB PE=1 SV=1	Homo sapiens	MSRSYNDELQFLEK	9606	1	1	1	2.8	55.21	2575400	0	0	0	0	0	0	0	0	0	2575400	0	0	0	0	0	0	0	0	0	0	0	0	0	0
Q7M732	Retrotransposon-like protein 1	Rtl1	sp|Q7M732|RTL1_MOUSE Retrotransposon-like protein 1 OS=Mus musculus OX=10090 GN=Rtl1 PE=2 SV=1	Mus musculus	MIEPSEDSFETMMELKNPSSK	10090	1	1	1	1.2	199.05	46258000	10094000	0	7847200	0	1147400	2000700	2709800	0	4720300	13734000	1179800	2824800	10514000	0	9009700	0	1227700	907640	1466900	0	2348500	11996000	311380	1160400
O70622	Reticulon-2	Rtn2	sp|O70622|RTN2_MOUSE Reticulon-2 OS=Mus musculus OX=10090 GN=Rtn2 PE=1 SV=1	Mus musculus	IPGTGTLAPTASVSGSK	10090	1	1	1	3.6	51.346	15982000	0	1520900	970130	820220	3167100	1132000	938080	4177200	1092200	2163800	0	0	0	1059900	1145900	924410	2028600	639300	783690	2380900	676480	1826200	0	0
Q5QGU6	Receptor-transporting protein 3	Rtp3	sp|Q5QGU6|RTP3_MOUSE Receptor-transporting protein 3 OS=Mus musculus OX=10090 GN=Rtp3 PE=1 SV=2	Mus musculus	MMEEDIGDTEQWR	10090	1	1	1	2.7	52.22	8006100	0	0	0	0	0	0	580890	1087800	2238800	377330	1035700	2685400	0	0	0	0	0	0	586900	757840	1104600	529360	694060	1099300
Q9WTM5	RuvB-like 2	Ruvbl2	sp|Q9WTM5|RUVB2_MOUSE RuvB-like 2 OS=Mus musculus OX=10090 GN=Ruvbl2 PE=1 SV=3	Mus musculus	ATVAATTKVPEIR;ATVAATTKVPEIRDVTR	10090	2	2	2	3.7	51.112	19669000	681320	385530	1238200	342290	2122900	1320600	1749500	623470	6715300	754070	1025100	2710200	702530	408720	1331300	466400	1403100	396230	719600	397710	2155200	780400	569440	761690
P08207	Protein S100-A10	S100a10	sp|P08207|S10AA_MOUSE Protein S100-A10 OS=Mus musculus OX=10090 GN=S100a10 PE=1 SV=2	Mus musculus	EFPGFLENQKDPLAVDK;FAGDKDHLTK;FAGDKDHLTKEDLR	10090	3	3	2	32	11.186	53424000	1173900	3976300	7338300	1538700	5380600	5486400	220720	0	4758800	9826000	8508400	5216500	1048600	3144300	6380700	1654100	4001200	1149900	175050	0	3344500	5904200	3241500	3027000
P31949	Protein S100-A11	S100A11	sp|P31949|S10AB_HUMAN Protein S100-A11 OS=Homo sapiens OX=9606 GN=S100A11 PE=1 SV=2	Homo sapiens	CIESLIAVFQK;NQKDPGVLDR	9606	2	2	0	20	11.74	34638000	414750	0	0	214600	486260	0	7938400	0	19057000	0	3051300	3475600	1143800	0	0	0	0	0	9395500	0	6163400	0	2278300	2391700
P06703	Protein S100-A6	S100A6	sp|P06703|S10A6_HUMAN Protein S100-A6 OS=Homo sapiens OX=9606 GN=S100A6 PE=1 SV=1	Homo sapiens	ELIQKELTIGSK;ELIQKELTIGSKLQDAEIAR;ELTIGSKLQDAEIAR	9606	3	3	0	22.2	10.18	313740000	7426400	5776900	21611000	28208000	64598000	19181000	50536000	8301300	45738000	3513000	32980000	25867000	5184000	3546000	16294000	13690000	25993000	6722600	18456000	4325800	17781000	2313600	14110000	9149000
Q6UGQ3	Secretoglobin family 2B member 2	Scgb2b2	sp|Q6UGQ3|SG2B2_MOUSE Secretoglobin family 2B member 2 OS=Mus musculus OX=10090 GN=Scgb2b2 PE=2 SV=1	Mus musculus	EAFEKIQDCYEEEGLKAK;IGLHTELAPFDPTVEEK	10090	2	2	2	30.7	12.857	4637100	0	0	0	0	0	0	0	0	0	4637100	0	0	0	0	0	0	0	0	0	0	0	0	0	0
Q8K2B3	Succinate dehydrogenase [ubiquinone] flavoprotein subunit, mitochondrial	Sdha	sp|Q8K2B3|SDHA_MOUSE Succinate dehydrogenase [ubiquinone] flavoprotein subunit, mitochondrial OS=Mus musculus OX=10090 GN=Sdha PE=1 SV=1	Mus musculus	AAFGLSEAGFNTACLTK;AFGGQSLKFGK;GEGGILINSQGER;TEDGKIYQR;VGSVLQEGCEK;VSDAISTQYPVVDHEFDAVVVGAGGAGLR	10090	6	6	3	13.6	72.585	144760000	18257000	2915600	11973000	7229200	7952300	24343000	10521000	8399100	8575800	14264000	17772000	12558000	7874500	1685400	3431300	2919000	3858200	3149700	4339500	3980400	3264800	5882700	5021700	4824800
P21912	Succinate dehydrogenase [ubiquinone] iron-sulfur subunit, mitochondrial	SDHB	sp|P21912|SDHB_HUMAN Succinate dehydrogenase [ubiquinone] iron-sulfur subunit, mitochondrial OS=Homo sapiens OX=9606 GN=SDHB PE=1 SV=3	Homo sapiens	DLVPDLSNFYAQYK	9606	1	1	0	5	31.629	14241000	145810	1848700	1376200	900310	1185500	576400	1862500	0	1496900	755620	2380500	1712400	154370	1351200	1512200	755430	814810	341400	1316300	0	972350	668830	1319700	773310
Q63918	Serum deprivation-response protein	Sdpr	sp|Q63918|CAVN2_MOUSE Caveolae-associated protein 2 OS=Mus musculus OX=10090 GN=Cavin2 PE=1 SV=3	Mus musculus	GEDAAQAEK;QINLEGSVKGIQNDLTK	10090	2	2	1	6.2	46.763	18090000	306090	0	0	517370	544630	2318600	946810	10186000	0	1928800	500290	841650	521730	0	0	1178100	1005300	463500	1344100	2180500	0	2146900	865320	1104000
P42208	Septin-2	Septin2	sp|P42208|SEPT2_MOUSE Septin-2 OS=Mus musculus OX=10090 GN=Septin2 PE=1 SV=2	Mus musculus	ASIPFSVVGSNQLIEAK	10090	1	1	0	4.7	41.525	14040000	1213400	0	0	0	0	2030500	1383800	1275600	2448100	4415300	0	1272900	1228500	0	0	0	0	1184400	963130	799660	1413900	3848700	0	698830
P07759	Serine protease inhibitor A3K	Serpina3k	sp|P07759|SPA3K_MOUSE Serine protease inhibitor A3K OS=Mus musculus OX=10090 GN=Serpina3k PE=1 SV=2	Mus musculus	ALYQTEAFTADFQQPTEAK;AVLDVAETGTEAAAATGVIGGIR;AVLDVAETGTEAAAATGVIGGIRK;DLQILAEFHEK;ISFDPQDTFESEFYLDEKR	10090	5	5	5	17.5	46.879	178950000	12479000	9297900	11233000	16529000	15513000	15073000	5484100	28402000	15936000	17134000	17666000	14202000	7985000	3278000	6441100	7411000	5537900	6225000	2548300	8136500	4122300	3099200	7991900	5113400
P01008	Antithrombin-III	SERPINC1	sp|P01008|ANT3_HUMAN Antithrombin-III OS=Homo sapiens OX=9606 GN=SERPINC1 PE=1 SV=1	Homo sapiens	TSDQIHFFFAK	9606	1	1	0	2.4	52.602	14050000	699470	740180	1041300	2268000	1288900	1284500	0	1092100	1485500	502350	2543900	1103600	699470	526220	1112900	2192100	861770	740080	0	676300	938660	432530	1371800	575750
P19324	Serpin H1	Serpinh1	sp|P19324|SERPH_MOUSE Serpin H1 OS=Mus musculus OX=10090 GN=Serpinh1 PE=1 SV=3	Mus musculus	GVVEVTHDLQK;LYGPSSVSFADDFVR;SALQSINEWASQTTDGKLPEVTKDVER	10090	3	3	1	12.7	46.533	91633000	636390	8461100	1983900	821720	10905000	18179000	5294600	4865500	15034000	4253900	14161000	7037500	874970	2527300	1609100	525520	5524600	6334700	2849500	2782700	6799100	2004100	5013600	2126900
Q5VUG0	Scm-like with four MBT domains protein 2	SFMBT2	sp|Q5VUG0|SMBT2_HUMAN Scm-like with four MBT domains protein 2 OS=Homo sapiens OX=9606 GN=SFMBT2 PE=1 SV=1	Homo sapiens	ESTLSASNMQDPSSSPLEK	9606	1	1	1	2.1	100.56	460910000	10214000	17746000	35766000	18297000	80173000	72986000	32076000	43197000	96816000	0	53640000	0	0	0	0	0	0	0	0	0	0	0	0	0
P23246	Splicing factor, proline- and glutamine-rich	SFPQ	sp|P23246|SFPQ_HUMAN Splicing factor, proline- and glutamine-rich OS=Homo sapiens OX=9606 GN=SFPQ PE=1 SV=2	Homo sapiens	LFVGNLPADITEDEFK;REEEMMIR	9606	2	2	0	3.4	76.149	4187200	140640	933240	482500	0	0	0	0	1379600	0	0	509990	741250	279100	606200	534450	0	0	0	0	687870	0	0	265430	462810
Q91V61	Sideroflexin-3	Sfxn3	sp|Q91V61|SFXN3_MOUSE Sideroflexin-3 OS=Mus musculus OX=10090 GN=Sfxn3 PE=1 SV=1	Mus musculus	AGVATPGLTEDQLWR;AQIQAQNPSIDVVYYNKGL;ELQVGIPVTDEAGQR;GDLPLNINIQEPR;NLLLSGEQLEASR	10090	5	5	5	23.4	35.406	40995000	2103000	1251000	2443300	2091800	4847300	7998600	0	2495500	4146500	3453600	4151300	6012800	1534100	978100	1201900	1207300	1306400	2682700	0	1137500	2226600	1095000	975020	1909200
P82347	Delta-sarcoglycan	Sgcd	sp|P82347|SGCD_MOUSE Delta-sarcoglycan OS=Mus musculus OX=10090 GN=Sgcd PE=1 SV=1	Mus musculus	LEGDSEFLQPLYAK;VLGAEGTVFPK	10090	2	2	0	8.7	32.133	23412000	1063300	2851200	3333800	1390900	0	0	3172900	0	3817900	259160	2962900	4560300	1061600	1247500	2564500	1201700	0	0	1687200	0	1434500	1105200	984310	1842800
Q9JJU8	SH3 domain-binding glutamic acid-rich-like protein	Sh3bgrl	sp|Q9JJU8|SH3L1_MOUSE SH3 domain-binding glutamic acid-rich-like protein OS=Mus musculus OX=10090 GN=Sh3bgrl PE=1 SV=1	Mus musculus	DIAANEENRK;ENNAVYAFLGLTAPPGSK;ENNAVYAFLGLTAPPGSKEAEAQANQQA	10090	3	3	1	33.3	12.811	41042000	0	1485100	2182200	1989600	5524600	9746900	2373800	1203900	2979300	1392900	5244800	6919100	0	705530	1185000	1071500	1993200	2910700	852160	1390100	1120600	1037500	1521500	2236200
Q91VW3	SH3 domain-binding glutamic acid-rich-like protein 3	Sh3bgrl3	sp|Q91VW3|SH3L3_MOUSE SH3 domain-binding glutamic acid-rich-like protein 3 OS=Mus musculus OX=10090 GN=Sh3bgrl3 PE=1 SV=1	Mus musculus	SGLRVYSTSVTGSR	10090	1	1	0	15.1	10.477	32654000	0	3429700	4363900	0	3148600	4604800	0	1629300	2823400	0	3791400	8862900	0	2438300	4664300	0	2105200	2653000	0	1008900	1784000	0	2044500	4623800
Q9UIU6	Homeobox protein SIX4	SIX4	sp|Q9UIU6|SIX4_HUMAN Homeobox protein SIX4 OS=Homo sapiens OX=9606 GN=SIX4 PE=1 SV=2	Homo sapiens	LVLQSVANMK	9606	1	1	1	1.3	82.932	12758000	0	1696300	1002600	784750	0	2780600	1537200	0	0	0	1242900	3713200	0	1221000	1105200	968300	0	1407200	1143000	0	0	0	910230	1547500
Q8WVK7	Spindle and kinetochore-associated protein 2	SKA2	sp|Q8WVK7|SKA2_HUMAN Spindle and kinetochore-associated protein 2 OS=Homo sapiens OX=9606 GN=SKA2 PE=1 SV=1	Homo sapiens	MEAEVDK	9606	1	1	0	5.8	14.188	1544800	636940	0	397700	510190	0	0	0	0	0	0	0	0	0	0	0	0	0	0	0	0	0	0	0	0
P53986	Monocarboxylate transporter 1	Slc16a1	sp|P53986|MOT1_MOUSE Monocarboxylate transporter 1 OS=Mus musculus OX=10090 GN=Slc16a1 PE=1 SV=1	Mus musculus	AAQSPQQHSSGDPTEEESPV;SDANTDLIGGSPK	10090	2	2	2	6.7	53.267	30817000	3238000	284030	628020	185060	1779000	8572800	2992400	1456300	3616300	2839400	5226000	0	3657100	287460	468860	124940	830790	5199400	2505900	629890	629800	2893500	2279500	0
Q9WTW5	Solute carrier family 22 member 3	Slc22a3	sp|Q9WTW5|S22A3_MOUSE Solute carrier family 22 member 3 OS=Mus musculus OX=10090 GN=Slc22a3 PE=2 SV=1	Mus musculus	MPTFDQALRK	10090	1	1	1	1.8	61.052	232210000	15786000	8936300	15167000	19943000	7806600	26015000	9429400	38219000	25270000	15967000	25706000	23964000	15987000	7718800	15557000	18757000	5008700	15338000	7844300	22104000	16134000	14314000	13302000	11998000
O75746	Calcium-binding mitochondrial carrier protein Aralar1	SLC25A12	sp|O75746|CMC1_HUMAN Calcium-binding mitochondrial carrier protein Aralar1 OS=Homo sapiens OX=9606 GN=SLC25A12 PE=1 SV=2	Homo sapiens	IAPLAEGALPYNLAELQR	9606	1	1	0	2.7	74.761	57988000	1051600	7027400	3285500	6178400	3038900	14074000	3008000	0	4743100	4747900	6353500	4479900	1009400	5202900	3657100	6218900	1796200	8444300	1824200	0	3121100	3311600	3568000	2434000
Q5U680	S-adenosylmethionine mitochondrial carrier protein	Slc25a26	sp|Q5U680|SAMC_MOUSE S-adenosylmethionine mitochondrial carrier protein OS=Mus musculus OX=10090 GN=Slc25a26 PE=1 SV=2	Mus musculus	MAAISMGGFIFLGAYDQAR	10090	1	1	1	6.9	29.026	1131400	0	0	0	0	0	0	0	0	1131400	0	0	0	0	0	0	0	0	0	0	0	0	0	0	0
Q8VEM8	Phosphate carrier protein, mitochondrial	Slc25a3	sp|Q8VEM8|MPCP_MOUSE Phosphate carrier protein, mitochondrial OS=Mus musculus OX=10090 GN=Slc25a3 PE=1 SV=1	Mus musculus	IQTQPGYANTLR;KLGLTE	10090	2	2	1	5	39.632	228380000	0	13039000	6874400	45496000	7115100	19511000	9642100	9572800	52910000	34087000	603040	29529000	0	9269900	6310400	43633000	4304000	10002000	6050800	5927800	31854000	29349000	0	15161000
P48962	ADP/ATP translocase 1	Slc25a4	sp|P48962|ADT1_MOUSE ADP/ATP translocase 1 OS=Mus musculus OX=10090 GN=Slc25a4 PE=1 SV=4	Mus musculus	DFLAGGIAAAVSK;EFNGLGDCLTK;LAADVGKGSSQR;LLLQVQHASK;VKLLLQVQHASK;YFPTQALNFAFK	10090	6	6	3	20.1	32.904	195790000	3261700	34293000	7923200	10134000	7294800	45523000	17528000	4082000	4375100	23335000	8358200	29685000	2345000	7857600	9012100	3502700	4552900	13503000	5821600	4052500	1636900	10075000	4098600	7096000
P05141	ADP/ATP translocase 2	SLC25A5	sp|P05141|ADT2_HUMAN ADP/ATP translocase 2 OS=Homo sapiens OX=9606 GN=SLC25A5 PE=1 SV=7;sp|P12236|ADT3_HUMAN ADP/ATP translocase 3 OS=Homo sapiens OX=9606 GN=SLC25A6 PE=1 SV=4;sp|P12235|ADT1_HUMAN ADP/ATP translocase 1 OS=Homo sapiens OX=9606 GN=SLC25A4 PE	Homo sapiens	DFLAGGVAAAISK;LLLQVQHASK;TDAAVSFAK;VKLLLQVQHASK;YFPTQALNFAFK	9606	5	2	0	15.4	32.852	42201000	1322400	3406600	1712200	1478900	4009100	7076400	3117900	2861100	7901400	2073700	3994600	3246200	1603300	1600500	2079100	1706200	1458900	3946200	2359400	2033700	1807900	2038500	2346000	1844500
P11166	Solute carrier family 2, facilitated glucose transporter member 1	SLC2A1	sp|P11166|GTR1_HUMAN Solute carrier family 2, facilitated glucose transporter member 1 OS=Homo sapiens OX=9606 GN=SLC2A1 PE=1 SV=2	Homo sapiens	TFDEIASGFR;TFDEIASGFRQGGASQSDKTPEELFHPLGADSQV	9606	2	2	0	6.9	54.083	14179000	1277700	0	1082300	1597400	0	1808000	2421300	0	0	4126200	1866100	0	1302500	0	1174100	1567000	0	1136800	1553700	0	0	1622800	1110900	0
Q9DCP2	Sodium-coupled neutral amino acid transporter 3	Slc38a3	sp|Q9DCP2|S38A3_MOUSE Sodium-coupled neutral amino acid transporter 3 OS=Mus musculus OX=10090 GN=Slc38a3 PE=1 SV=1	Mus musculus	MEIPRQTEMVELVPNGK	10090	1	1	1	3.4	55.591	7270500	0	0	0	498070	2052500	0	0	1322800	0	0	0	3397100	0	0	0	0	0	0	0	0	0	0	0	0
P10852	4F2 cell-surface antigen heavy chain	Slc3a2	sp|P10852|4F2_MOUSE 4F2 cell-surface antigen heavy chain OS=Mus musculus OX=10090 GN=Slc3a2 PE=1 SV=1	Mus musculus	LGASNLPAGISLPASAK	10090	1	1	1	3.2	58.336	40652000	0	8822300	1000000	1007500	2470100	3301700	4249400	3167100	2758100	6398500	3616600	3861200	0	6272100	1068900	973810	1651500	1902300	2921400	1961200	1742800	5509100	1950200	2014400
Q6X893	Choline transporter-like protein 1	Slc44a1	sp|Q6X893|CTL1_MOUSE Choline transporter-like protein 1 OS=Mus musculus OX=10090 GN=Slc44a1 PE=1 SV=3	Mus musculus	LVSGYDSYGNICGQR	10090	1	1	1	2.3	73.066	6457700	0	617990	0	910290	0	0	1011600	1799500	740910	0	690440	686990	0	495670	0	906730	0	0	673220	921860	517110	0	443880	369370
P04919	Band 3 anion transport protein	Slc4a1	sp|P04919|B3AT_MOUSE Band 3 anion transport protein OS=Mus musculus OX=10090 GN=Slc4a1 PE=1 SV=1	Mus musculus	ALLNLVPVQKELLR;ANFLEKPVLGFVR;ASGPGAAAQIQEVK;SGGASEPLLPHQPSLETQLYCGQAEGGSEGPSTSGTLK;SHAEDLGNLEGVKPAVLTR;SLESFLDCSLVLPPTDAPSEK	10090	6	6	6	12.8	103.13	491890000	4884700	37946000	9030400	15953000	73202000	86367000	41181000	109930000	21706000	36512000	23005000	32172000	5326300	20724000	5763000	12877000	35474000	34877000	15576000	31221000	12876000	23788000	10927000	11884000
Q9EPT5	Solute carrier organic anion transporter family member 2A1	Slco2a1	sp|Q9EPT5|SO2A1_MOUSE Solute carrier organic anion transporter family member 2A1 OS=Mus musculus OX=10090 GN=Slco2a1 PE=1 SV=2	Mus musculus	MEEDKSRGSLMDFIK	10090	1	1	1	2.3	70.146	46134000	2666700	6969400	2360200	3776900	3198400	6703400	2891200	2607300	5544100	0	5562300	3854100	2703900	5024000	2456700	3701500	2125900	3916100	2015400	1637100	3274300	0	3041300	2014400
O94813	Slit homolog 2 protein	SLIT2	sp|O94813|SLIT2_HUMAN Slit homolog 2 protein OS=Homo sapiens OX=9606 GN=SLIT2 PE=1 SV=1	Homo sapiens	QSTLNFDSPLYVGGMPGK	9606	1	1	0	1.2	169.87	51659000	6088500	4085500	10028000	2101300	3906100	1728900	4998400	9178700	3769600	1168400	4605500	0	0	0	0	0	0	0	0	0	0	0	0	0
Q3URD3	Sarcolemmal membrane-associated protein	Slmap	sp|Q3URD3|SLMAP_MOUSE Sarcolemmal membrane-associated protein OS=Mus musculus OX=10090 GN=Slmap PE=1 SV=2	Mus musculus	DKLLSAQDEILLLR;DTEISSTRDKLLSAQDEILLLR;ELVEAQELAR;ENVLLSSELQR;LLSAQDEILLLR	10090	5	5	4	5.1	96.932	63823000	769260	5336900	4504500	2655000	9204500	6631100	5653500	2166000	11611000	1553900	4645200	9092100	1207800	1517500	1971400	1881000	1539700	1535500	1683100	1233800	2286900	742120	1457300	3086500
Q921U8	Smoothelin	Smtn	sp|Q921U8|SMTN_MOUSE Smoothelin OS=Mus musculus OX=10090 GN=Smtn PE=1 SV=2	Mus musculus	ADEALAGLDEGALR;ADEALAGLDEGALRK;EAEQQAALAR;SPLSAEELTAIEDEGVLDK	10090	4	4	2	4.8	100.29	130040000	8590800	7033900	12885000	6297700	8874000	9695200	12769000	19998000	11306000	3501900	11073000	18013000	7144100	2471200	4650800	2161900	3155300	2285200	2861100	8897200	2327400	1654400	2954000	4472100
Q9Z0F7	Gamma-synuclein	Sncg	sp|Q9Z0F7|SYUG_MOUSE Gamma-synuclein OS=Mus musculus OX=10090 GN=Sncg PE=1 SV=1	Mus musculus	KEDLEPPAQDQEAK;KEDLEPPAQDQEAKEQEENEEAK	10090	2	2	2	18.7	13.159	50927000	3288700	0	286840	18159000	1133600	1260800	5204400	0	3045300	934360	0	17614000	2466900	0	1837500	17132000	739800	449710	1932200	0	1878300	785290	0	8970200
P08228	Superoxide dismutase [Cu-Zn]	Sod1	sp|P08228|SODC_MOUSE Superoxide dismutase [Cu-Zn] OS=Mus musculus OX=10090 GN=Sod1 PE=1 SV=2	Mus musculus	AVCVLKGDGPVQGTIHFEQK;DGVANVSIEDRVISLSGEHSIIGR;HVGDLGNVTAGK;HVGDLGNVTAGKDGVANVSIEDR;HVGDLGNVTAGKDGVANVSIEDRVISLSGEHSIIGR;VISLSGEHSIIGR	10090	6	6	6	36.4	15.942	866540000	40641000	40697000	17614000	29696000	165260000	118490000	43368000	161140000	157490000	27043000	26961000	38153000	23987000	16580000	10419000	15749000	66285000	32865000	11728000	41652000	38994000	12524000	12383000	12644000
P09671	Superoxide dismutase [Mn], mitochondrial	Sod2	sp|P09671|SODM_MOUSE Superoxide dismutase [Mn], mitochondrial OS=Mus musculus OX=10090 GN=Sod2 PE=1 SV=3	Mus musculus	AIWNVINWENVTER;GDVTTQVALQPALK;GELLEAIKR;GGGEPKGELLEAIKR	10090	4	4	2	19.4	24.603	165550000	15605000	10963000	6338000	29797000	7706300	11652000	11477000	7022400	11697000	18396000	12362000	22532000	5177600	5180800	5405700	6692200	5908200	2062300	3907300	4740100	6346900	5958100	6162800	5012100
Q62417	Sorbin and SH3 domain-containing protein 1	Sorbs1	sp|Q62417|SRBS1_MOUSE Sorbin and SH3 domain-containing protein 1 OS=Mus musculus OX=10090 GN=Sorbs1 PE=1 SV=2	Mus musculus	QFGTFPGNYVKPLYL	10090	1	1	0	1.2	143.07	2389800	0	0	0	0	0	822530	0	0	1567300	0	0	0	0	0	0	0	0	473900	0	0	990310	0	0	0
O94875	Sorbin and SH3 domain-containing protein 2	SORBS2	sp|O94875|SRBS2_HUMAN Sorbin and SH3 domain-containing protein 2 OS=Homo sapiens OX=9606 GN=SORBS2 PE=1 SV=3	Homo sapiens	KRGSLPDNSILHR;NEDELELR;RVDQNWYEGKIPGTNR;TKFFGTFPGNYVK;TQTYRPLSK	9606	5	5	1	5.4	124.11	235150000	36672000	23009000	8230800	12917000	10277000	16130000	4242100	31103000	28868000	35605000	20907000	7187000	10248000	4680600	7412200	8428000	7299500	5023400	3045400	13286000	20011000	13830000	8302800	4236900
Q64442	Sorbitol dehydrogenase	Sord	sp|Q64442|DHSO_MOUSE Sorbitol dehydrogenase OS=Mus musculus OX=10090 GN=Sord PE=1 SV=3	Mus musculus	AAPAKGENLSLVVHGPGDIR;LENYPIPELGPNDVLLK	10090	2	2	2	10.4	38.249	35816000	1952000	974040	1867500	1414400	2462100	5548800	1418200	3443000	8316200	1602800	4280700	2536500	1748800	2933800	1403000	1285900	1064900	2471800	873460	1276300	4205100	1236400	1451900	1185500
O43278	Kunitz-type protease inhibitor 1	SPINT1	sp|O43278|SPIT1_HUMAN Kunitz-type protease inhibitor 1 OS=Homo sapiens OX=9606 GN=SPINT1 PE=1 SV=2	Homo sapiens	MAPARTMAR	9606	1	1	1	1.7	58.397	737530	0	0	0	0	0	737530	0	0	0	0	0	0	0	0	0	0	0	0	0	0	0	0	0	0
Q64105	Sepiapterin reductase	Spr	sp|Q64105|SPRE_MOUSE Sepiapterin reductase OS=Mus musculus OX=10090 GN=Spr PE=1 SV=1	Mus musculus	LLLINNAATLGDVSK	10090	1	1	1	5.7	27.883	6851200	0	0	0	424430	566290	1460800	0	1019100	0	0	1538000	1842600	0	0	0	484050	465020	693320	0	600350	0	0	688250	1121200
Q6PJ21	SPRY domain-containing SOCS box protein 3	SPSB3	sp|Q6PJ21|SPSB3_HUMAN SPRY domain-containing SOCS box protein 3 OS=Homo sapiens OX=9606 GN=SPSB3 PE=1 SV=2	Homo sapiens	LGWVLSMSCSRR	9606	1	1	1	3.4	39.376	1451100	0	95040	1356000	0	0	0	0	0	0	0	0	0	0	0	0	0	0	0	0	0	0	0	0	0
P08032	Spectrin alpha chain, erythrocytic 1	Spta1	sp|P08032|SPTA1_MOUSE Spectrin alpha chain, erythrocytic 1 OS=Mus musculus OX=10090 GN=Spta1 PE=1 SV=3	Mus musculus	AEQVDGVINLGNSLIER;ALNAADPGSDLLSVQALQR;ESLSNAADLQR;LSEIAELKDQLVAGEHSQAK;TALINADELPTDVASGEALLAR	10090	5	5	5	3.7	279.86	75400000	551670	12110000	4608700	1427200	9261900	17272000	824590	13974000	3725600	1845700	6172900	3625300	1107200	6119000	1887300	949630	2552800	4755700	882190	2186300	804650	1189700	923380	1022200
P16546	Spectrin alpha chain, non-erythrocytic 1	Sptan1	sp|P16546|SPTN1_MOUSE Spectrin alpha chain, non-erythrocytic 1 OS=Mus musculus OX=10090 GN=Sptan1 PE=1 SV=4	Mus musculus	AGQKLIDVNHYAK;AGTFQAFEQFGQQLLAHGHYASPEIK;ALSSEGKPYVTKEELYQNLTR;AQLADSFHLQQFFR;AQLADSFHLQQFFRDSDELKSWVNEK;DAEELEKWIQEK;DEADSKTASPWKSAR;DLAALGDKVNSLGETAQR;DLSSVQTLLTK;DSDELKSWVNEK;DVDEIEAWISEK;DVEDEETWIR;DVEDEETWIREKEPIAASTNR;EAALTNEEVGADLEQVEVLQK;EAFLNTEDKGDSLDSVEALIK;EANELQQWITEK;EANQQQQFNR;EELITNWEQIR;EKEPIAASTNR;EKEPIVGSTDYGKDEDSAEALLK;EKLDILDQER;EKLSILSEER;ELELQKEQR;ELPTAFDYVEFTR;ENLLEEQGSIALR…	10090	58	58	17	28.4	284.59	2472500000	150920000	238570000	129490000	141780000	242230000	270690000	175550000	222520000	286890000	139340000	244550000	230010000	25618000	23933000	24379000	21803000	24486000	25954000	20255000	24998000	24918000	20746000	23996000	22153000
P15508	Spectrin beta chain, erythrocytic	Sptb	sp|P15508|SPTB1_MOUSE Spectrin beta chain, erythrocytic OS=Mus musculus OX=10090 GN=Sptb PE=1 SV=4	Mus musculus	DLGQDLAGVIAIQR;QAEAILSNQEYTLAHLEPPDSLAAAEAGIR;VIEGQTDPDYQLLGQR	10090	3	3	3	2.8	245.25	20370000	0	0	865000	0	0	0	381900	1625700	595070	0	0	16902000	0	0	517160	0	0	0	531100	581440	352810	0	0	0
Q62261	Spectrin beta chain, non-erythrocytic 1	Sptbn1	sp|Q62261|SPTB2_MOUSE Spectrin beta chain, non-erythrocytic 1 OS=Mus musculus OX=10090 GN=Sptbn1 PE=1 SV=2	Mus musculus	ALVADSHPESER;DALLSALSIQNYHLECNETK;DASVAEAWLLGQEPYLSSR;DLDDFQSWLSR;DLVAIEAK;DQNTVETLQR;DVEDEILWVGER;EAEKLESEHPDQAQAILSR;EASLGEASKLQQFLR;EIEELQSQAQALSQEGK;EIGQSVDEVEK;ENEVLEAWKSLLDACEGRR;EQWANLEQLSAIR;EVDDLEQWIAER;HQILEQAVEDYAETVHQLSK;LADLKQLWGLLIEETEKR;LLTQHENIKNEIDNYEEDYQK;LSDGNEYLFQAK;LSDLQKEAEKLESEHPDQAQAILSR;LTTLELLEVR;LVSDGNINSDRIQEK;LVSQDNFGFDLPAVEAATK;RLVSDGNINSDRIQEK;SALPAQSAATLPAR;SNAHYNL…	10090	28	28	5	16.3	274.22	897680000	60517000	71881000	36037000	47481000	67817000	120830000	82693000	93730000	58999000	58078000	116660000	82959000	9160100	11680000	11031000	9161500	12544000	14697000	14896000	12621000	9247900	8104500	12034000	11216000
P30626	Sorcin	SRI	sp|P30626|SORCN_HUMAN Sorcin OS=Homo sapiens OX=9606 GN=SRI PE=1 SV=1	Homo sapiens	SGTVDPQELQK	9606	1	1	0	5.6	21.676	140380000	1904600	42712000	0	2877300	8151400	14668000	14146000	27963000	27705000	0	251440	0	1981300	31589000	0	1726400	3073300	8791900	10117000	18014000	18212000	0	129600	0
Q7TQ48	Sarcalumenin	Srl	sp|Q7TQ48|SRCA_MOUSE Sarcalumenin OS=Mus musculus OX=10090 GN=Srl PE=1 SV=2	Mus musculus	TIEGIVMAADSAR;VTFVDTPGIIENR	10090	2	2	0	5.5	54.286	110110000	3810900	20910000	3172200	3539000	3804600	11228000	11122000	13148000	3299200	12003000	12332000	11741000	3811300	13722000	3391000	3420900	2544000	6469500	7646600	8142800	2084900	10335000	6139600	6126200
Q07955	Serine/arginine-rich splicing factor 1	SRSF1	sp|Q07955|SRSF1_HUMAN Serine/arginine-rich splicing factor 1 OS=Homo sapiens OX=9606 GN=SRSF1 PE=1 SV=2	Homo sapiens	SGGGVIRGPAGNNDCR	9606	1	1	0	6.5	27.744	22662000	0	0	650670	520520	2664700	6906400	0	2598100	2426000	3009200	2924600	962230	0	0	572230	413960	1963900	3587900	0	1819200	1261300	2600700	1792200	759510
P51571	Translocon-associated protein subunit delta	SSR4	sp|P51571|SSRD_HUMAN Translocon-associated protein subunit delta OS=Homo sapiens OX=9606 GN=SSR4 PE=1 SV=1	Homo sapiens	FFDEESYSLLR	9606	1	1	0	6.4	18.998	9706800	0	1769300	565600	0	893230	1138500	1175400	0	1463700	502750	882410	1315900	0	1120200	646590	0	640700	687400	802180	0	889460	503300	472380	681510
Q9JM90	Signal-transducing adaptor protein 1	Stap1	sp|Q9JM90|STAP1_MOUSE Signal-transducing adaptor protein 1 OS=Mus musculus OX=10090 GN=Stap1 PE=1 SV=1	Mus musculus	KEATAMLEK	10090	1	1	1	3	34.627	7977700	1529800	0	0	870250	468850	0	1861700	728410	0	1568000	298510	652110	0	0	0	0	0	0	0	0	0	0	0	0
Q86UX6	Serine/threonine-protein kinase 32C	STK32C	sp|Q86UX6|ST32C_HUMAN Serine/threonine-protein kinase 32C OS=Homo sapiens OX=9606 GN=STK32C PE=1 SV=1	Homo sapiens	RMGSSMSAATAR	9606	1	1	1	2.5	54.994	233760000	14312000	3355800	16346000	0	0	7619200	0	192120000	0	0	0	0	14312000	2385800	17472000	0	0	4389800	0	118970000	0	0	0	0
Q9Z2I9	Succinyl-CoA ligase [ADP-forming] subunit beta, mitochondrial	Sucla2	sp|Q9Z2I9|SUCB1_MOUSE Succinate--CoA ligase [ADP-forming] subunit beta, mitochondrial OS=Mus musculus OX=10090 GN=Sucla2 PE=1 SV=2	Mus musculus	IFDLQDWSQEDER	10090	1	1	1	2.8	50.113	1839000	0	0	444790	0	0	0	0	0	0	0	0	1394200	0	0	475400	0	0	0	0	0	0	0	0	727370
P53597	Succinyl-CoA ligase [ADP/GDP-forming] subunit alpha, mitochondrial	SUCLG1	sp|P53597|SUCA_HUMAN Succinate--CoA ligase [ADP/GDP-forming] subunit alpha, mitochondrial OS=Homo sapiens OX=9606 GN=SUCLG1 PE=1 SV=4	Homo sapiens	LIGPNCPGVINPGECK	9606	1	1	0	4.6	36.249	7976200	0	388190	0	0	0	1396700	699050	0	0	2018600	1476900	1996800	0	294680	0	0	0	601460	426530	0	0	2011700	597300	1205800
Q8R086	Sulfite oxidase, mitochondrial	Suox	sp|Q8R086|SUOX_MOUSE Sulfite oxidase, mitochondrial OS=Mus musculus OX=10090 GN=Suox PE=1 SV=2	Mus musculus	INSQRPFNAEPPPELLTEGYITPNPIFFTR	10090	1	1	1	5.5	60.755	10902000	0	0	818580	1369700	3134700	0	852990	0	1084400	0	1630700	2011300	0	0	876140	1325700	2098800	0	587220	0	686150	0	889890	1031100
O43761	Synaptogyrin-3	SYNGR3	sp|O43761|SNG3_HUMAN Synaptogyrin-3 OS=Homo sapiens OX=9606 GN=SYNGR3 PE=1 SV=2	Homo sapiens	MEGASFGAGRAGAALDPVSFAR	9606	1	1	1	9.6	24.555	18768000	0	0	3689700	0	1739500	0	0	0	4055100	0	0	9284100	0	0	3943700	0	1163000	0	0	0	2562300	0	0	4843600
Q70IV5	Synemin	Synm	sp|Q70IV5|SYNEM_MOUSE Synemin OS=Mus musculus OX=10090 GN=Synm PE=1 SV=2	Mus musculus	AALEALLGRLETERR;ENLLLEEELR;LCAQEADALRNQALELEQLR;SLRQQLDELNWSTALAEGER	10090	4	4	3	4.2	173.21	48211000	1502900	0	3828800	1872700	1889700	16486000	1298400	3554100	0	862400	5013200	11903000	3416500	0	2215300	1582300	0	5140900	1117700	1580300	0	1019400	1585500	4023700
P37804	Transgelin	Tagln	sp|P37804|TAGL_MOUSE Transgelin OS=Mus musculus OX=10090 GN=Tagln PE=1 SV=3	Mus musculus	AAEDYGVIKTDMFQTVDLYEGKDMAAVQR;ANKGPSYGMSR;DFTDSQLQEGK;IEKKYDEELEER;KYDEELEER;LVEWIVVQCGPDVGRPDR;LVNSLYPEGSKPVKVPENPPSMVFK;QMEQVAQFLK;TLMALGSLAVTK;YDEELEER	10090	10	10	4	63.7	22.576	828020000	85804000	77614000	34849000	107220000	37865000	32658000	45386000	78983000	79659000	42183000	93831000	111970000	31635000	28740000	13299000	25573000	7378200	8222500	18110000	15600000	16418000	16416000	10572000	14745000
Q9WVA4	Transgelin-2	Tagln2	sp|Q9WVA4|TAGL2_MOUSE Transgelin-2 OS=Mus musculus OX=10090 GN=Tagln2 PE=1 SV=4	Mus musculus	ANRGPSYGLSR;DDGLFSGDPNWFPK;DDGLFSGDPNWFPKK;TLMNLGGLAVAR	10090	4	4	0	19.1	22.395	641480000	28607000	28384000	42635000	19722000	52480000	112230000	45226000	94677000	26603000	20202000	143880000	26827000	25388000	26434000	42029000	35609000	33044000	33911000	29212000	30661000	32191000	17605000	46198000	24714000
P59551	Taste receptor type 2 member 60	TAS2R60	sp|P59551|T2R60_HUMAN Taste receptor type 2 member 60 OS=Homo sapiens OX=9606 GN=TAS2R60 PE=2 SV=1	Homo sapiens	NGDHMVLGSSVTDKK	9606	1	1	1	4.7	36.336	9311600	0	439950	1047200	961250	466340	0	1219300	1456800	0	0	1682000	2038600	0	291590	1047500	925150	446770	0	863840	907150	0	0	910450	991510
Q921I1	Serotransferrin	Tf	sp|Q921I1|TRFE_MOUSE Serotransferrin OS=Mus musculus OX=10090 GN=Tf PE=1 SV=1	Mus musculus	ASDTSITWNNLK;AVLTSQETLFGGSDCTGNFCLFK;AVSSFFSGSCVPCADPVAFPK;KNNGKEDLIWEILK;SAGWVIPIGLLFCK;SKDFQLFSSPLGKDLLFK;VKAVLTSQETLFGGSDCTGNFCLFK	10090	7	7	7	14.9	76.723	69525000	2190800	345920	3608600	5219900	6131300	3198700	4563300	33161000	4856700	1476100	2662500	2110500	1773400	330950	1915400	3793200	3541400	2365200	2636900	8284100	2212300	987430	1837500	1409100
P40630	Transcription factor A, mitochondrial	Tfam	sp|P40630|TFAM_MOUSE Transcription factor A, mitochondrial OS=Mus musculus OX=10090 GN=Tfam PE=1 SV=2	Mus musculus	EQLTPSQLMGMEK	10090	1	1	1	5.3	27.987	112190000	0	2820200	0	30198000	0	36130000	13420000	0	0	24292000	5326100	0	0	2637400	0	15724000	0	27940000	7296400	0	0	28074000	3351400	0
P21981	Protein-glutamine gamma-glutamyltransferase 2	Tgm2	sp|P21981|TGM2_MOUSE Protein-glutamine gamma-glutamyltransferase 2 OS=Mus musculus OX=10090 GN=Tgm2 PE=1 SV=4	Mus musculus	CDLEIQANGR;DLYLENPEIKIR;EDITHTYKYPEGSPEER;EYVLTQQGFIYQGSVK;GLLIEPAANSYLLAER;GLLIEPAANSYLLAERDLYLENPEIK;GYEASVDSLTFGAVTGPDPSEEAGTK;RSSPIYVGR;SEGTYCCGPVSVR;SLVVGQKISTK;SVEVSDPVPAGDLVK;YPEGSPEER	10090	12	12	10	21.1	77.06	769890000	42852000	56872000	54266000	27414000	61529000	78869000	71476000	71280000	60473000	33462000	120280000	91113000	13386000	15670000	15038000	11364000	16104000	21074000	23769000	14462000	15279000	18411000	18091000	18773000
P35441	Thrombospondin-1	Thbs1	sp|P35441|TSP1_MOUSE Thrombospondin-1 OS=Mus musculus OX=10090 GN=Thbs1 PE=1 SV=1	Mus musculus	DDFDHDNVPDIDDICPENFDISETDFR;DNCQYVYNVDQR;DNTGQIFSVVSNGK;FTGSQPFGR;FVFGTTPEDILR;GDVNDNFQGVLQNVR;GRSCDSLNNRCEGSSVQTR;GTSQNDPNWVVR;LRVAKGDVNDNFQGVLQNVR;NALWHTGNTPGQVR;RLVKGQDLSSPAFR;SCDSLNNRCEGSSVQTR;TIVTTLQDSIR;VAKGDVNDNFQGVLQNVR	10090	14	14	7	14	129.65	321650000	3318500	47218000	10080000	12599000	18772000	31311000	27026000	38915000	10145000	5321900	66977000	49967000	1792300	6196800	4226000	3781700	3959500	3208900	3776800	6758600	3296200	1919600	12915000	6944800
P29401	Transketolase	TKT	sp|P29401|TKT_HUMAN Transketolase OS=Homo sapiens OX=9606 GN=TKT PE=1 SV=3	Homo sapiens	ILATPPQEDAPSVDIANIR;ISSDLDGHPVPK	9606	2	2	0	5	67.877	48656000	2175500	1209700	3978200	1003500	655450	5288000	4041300	13496000	2363300	3650200	4045500	6749600	2173400	859180	4248000	968950	437810	3043800	2251300	4632700	1491900	1724800	1012300	1917600
P26039	Talin-1	Tln1	sp|P26039|TLN1_MOUSE Talin-1 OS=Mus musculus OX=10090 GN=Tln1 PE=1 SV=2	Mus musculus	ALDGDFTEENR;ASAGPQPLLVQSCK;AVAEQIPLLVQGVR;EADESLNFEEQILEAAK;GSQAQPDSPSAQLALIAASQSFLQPGGK;ILAQATSDLVNAIK;ILAQATSDLVNAIKADAEGESDLENSR;LAQAAQSSVATITR;LASQAKPAAVAAENEEIGAHIK;LGAASLGAEDPETQVVLINAVKDVAK;LLAALLEDEGGNGRPLLQAAK;LLGEIAQGNENYAGIAAR;LNEAAAGLNQAATELVQASR;LQAAGNAVKR;NGNLPEFGDAIATASK;QAAASATQTIAAAQHAASAPK;QEDVIATANLSR;QVAASTAQLLVACK;SNTSPEELGPLANQLTSDYGR;TLAESALQLLYTAK;TLAESALQLLYTAKEAGGNPK;VGA…	10090	23	23	6	15	269.82	503280000	42791000	41813000	32537000	36469000	36025000	58020000	27643000	38177000	60156000	30581000	46349000	52714000	8792200	5452000	5481600	6654400	6015600	6541300	5009700	4432700	6712700	6432500	6210400	6170000
Q99KF1	Transmembrane emp24 domain-containing protein 9	Tmed9	sp|Q99KF1|TMED9_MOUSE Transmembrane emp24 domain-containing protein 9 OS=Mus musculus OX=10090 GN=Tmed9 PE=1 SV=2	Mus musculus	DKLSELQLR;QLVEQVEQIQKEQNYQR	10090	2	2	0	11.1	27.127	26600000	0	3362500	2095200	1753400	1332000	1693200	3078100	0	6079400	665430	2563100	3977800	0	2101100	1194700	1769100	1282400	1342200	1976800	0	1786200	1028600	1597600	1957600
Q5SYH2	Transmembrane protein 199	Tmem199	sp|Q5SYH2|TM199_MOUSE Transmembrane protein 199 OS=Mus musculus OX=10090 GN=Tmem199 PE=1 SV=1	Mus musculus	MASSLLAGER	10090	1	1	0	4.8	23.099	84918000	3941200	29385000	3070300	0	8896400	21514000	11360000	0	6751200	0	0	0	4051100	28706000	3696600	0	4976800	7184400	5702600	0	4214700	0	0	0
Q61029	Lamina-associated polypeptide 2, isoforms beta/delta/epsilon/gamma	Tmpo	sp|Q61029|LAP2B_MOUSE Lamina-associated polypeptide 2, isoforms beta/delta/epsilon/gamma OS=Mus musculus OX=10090 GN=Tmpo PE=1 SV=4;sp|Q61033|LAP2A_MOUSE Lamina-associated polypeptide 2, isoforms alpha/zeta OS=Mus musculus OX=10090 GN=Tmpo PE=1 SV=4	Mus musculus	DVYVQLYLQHLTAR;LEDKDDLDVTELSNEELLDQLVR;NRPPLAAGANSK;PEFLEDPSVLTK	10090	4	4	2	13.5	50.372	19705000	0	342500	2200000	356220	2215500	1468200	2907500	2990900	1910100	848680	2863800	1601400	0	524940	448860	644200	0	0	2413500	1553600	845140	437100	855880	654480
Q8N394	Transmembrane and TPR repeat-containing protein 2	TMTC2	sp|Q8N394|TMTC2_HUMAN Protein O-mannosyl-transferase TMTC2 OS=Homo sapiens OX=9606 GN=TMTC2 PE=1 SV=1	Homo sapiens	EAIQKMPRQFAPQSLYNMMGEAYMR	9606	1	1	1	3	94.129	9435700	0	0	846560	0	1793700	0	2313800	0	0	1037300	0	3444300	0	0	838770	0	1308400	0	1506900	0	0	1129100	0	1601600
P02585	Troponin C, skeletal muscle	TNNC2	sp|P02585|TNNC2_HUMAN Troponin C, skeletal muscle OS=Homo sapiens OX=9606 GN=TNNC2 PE=1 SV=2	Homo sapiens	DGDKNNDGRIDFDEFLK;SYLSEEMIAEFK;TDQQAEAR	9606	3	3	0	23.1	18.122	226240000	14419000	23954000	6842000	4584200	30602000	3837900	10405000	39806000	6952800	10573000	42567000	31697000	7730500	15352000	6445000	4830200	7437800	2342400	4408400	16764000	3688200	5217900	15646000	12080000
P13412	Troponin I, fast skeletal muscle	Tnni2	sp|P13412|TNNI2_MOUSE Troponin I, fast skeletal muscle OS=Mus musculus OX=10090 GN=Tnni2 PE=2 SV=2	Mus musculus	DLRDVGDWRK;SVMLQIAATELEK	10090	2	2	0	12.6	21.357	164960000	0	84249000	0	3890700	22534000	8861800	22707000	10781000	0	0	11938000	0	0	36719000	0	6239800	21371000	6735900	20595000	9596600	0	0	9338700	0
Q9QZ47	Troponin T, fast skeletal muscle	Tnnt3	sp|Q9QZ47|TNNT3_MOUSE Troponin T, fast skeletal muscle OS=Mus musculus OX=10090 GN=Tnnt3 PE=1 SV=3	Mus musculus	ELWDTLYQLETDK;RKPLNIDHLSDDKLR	10090	2	2	2	10.3	32.24	37213000	0	1965200	378870	651590	9528500	450610	2871400	4437200	6607700	0	5166900	5155400	0	5102200	1408200	2034600	2639000	948100	935900	1675000	1640300	0	2385900	1959800
Q9H0E2	Toll-interacting protein	TOLLIP	sp|Q9H0E2|TOLIP_HUMAN Toll-interacting protein OS=Homo sapiens OX=9606 GN=TOLLIP PE=1 SV=1	Homo sapiens	ATTVSTQRGPVYIGELPQDFLR;GPVYIGELPQDFLR	9606	2	2	0	8	30.281	13865000	1187700	0	910580	326070	880950	1104100	1879200	1208400	2170600	932980	2086700	1177600	458010	0	671950	381210	785500	769460	863890	578720	944110	513460	693020	631870
P17751	Triosephosphate isomerase	Tpi1	sp|P17751|TPIS_MOUSE Triosephosphate isomerase OS=Mus musculus OX=10090 GN=Tpi1 PE=1 SV=5	Mus musculus	ELASQPDVDGFLVGGASLKPEFVDIINAKQ;IAVAAQNCYK;IIYGGSVTGATCK;SNVNDGVAQSTR;TATPQQAQEVHEK;VVLAYEPVWAIGTGK	10090	6	6	1	37.3	26.712	342190000	23616000	7863100	27693000	12681000	15695000	24374000	44637000	54160000	23893000	22649000	62903000	22023000	9597300	4436000	10546000	6074900	4809300	7154200	6828200	15888000	6819600	7453300	19969000	8869300
P58771	Tropomyosin alpha-1 chain	Tpm1	sp|P58771|TPM1_MOUSE Tropomyosin alpha-1 chain OS=Mus musculus OX=10090 GN=Tpm1 PE=1 SV=1	Mus musculus	AAEDRSKQLEDELVSLQK;AEERAELSEGK;AELSEGKCAELEEELK;AELSEGKCAELEEELKTVTNNLK;AISEELDHALNDMTSI;AQERLATALQKLEEAEK;AQKDEEKMEIQEIQLK;ATDAEADVASLNR;ATDAEADVASLNRR;CAELEEELK;CAELEEELKTVTNNLK;CAELEEELKTVTNNLKSLEAQAEK;EAETRAEFAER;ENALDRAEQAEADKK;HIAEDADRKYEEVAR;IQLVEEELDR;IQLVEEELDRAQER;IQLVEEELDRAQERLATALQK;KATDAEADVASLNR;KATDAEADVASLNRR;KLVIIESDLER;KLVIIESDLERAEER;LATALQKLEEAEK;LATALQKLEEAEKAADESER;LDKENALD…	10090	42	42	0	79.9	32.68	22264000000	1443700000	2121700000	1788400000	1517800000	1687000000	1790700000	1314700000	1528800000	3226200000	1647900000	2242900000	1954000000	405670000	307710000	384430000	356450000	309150000	207030000	266270000	266470000	283800000	313540000	255280000	325290000
P58774	Tropomyosin beta chain	Tpm2	sp|P58774|TPM2_MOUSE Tropomyosin beta chain OS=Mus musculus OX=10090 GN=Tpm2 PE=1 SV=1	Mus musculus	AEVAESKCGDLEEELKIVTNNLK;AQERLATALQKLEEAEK;ATDAEADVASLNR;ATDAEADVASLNRR;CGDLEEELK;CGDLEEELKIVTNNLK;CKQLEEEQQALQK;CKQLEEEQQALQKK;DAQEKLEQAEK;EAETRAEFAER;EDKYEEEIKLLEEK;GTEDEVEKYSESVK;GTEDEVEKYSESVKDAQEK;HIAEDSDRKYEEVAR;IQLVEEELDR;IQLVEEELDRAQER;IQLVEEELDRAQERLATALQK;KATDAEADVASLNR;KATDAEADVASLNRR;KLKGTEDEVEK;KLVILEGELER;KLVILEGELERSEER;LATALQKLEEAEK;LATALQKLEEAEKAADESER;LEEAEKAADESER;LEQAEKKATDAEAD…	10090	40	26	4	75	32.836	6610300000	535760000	253210000	302240000	694610000	448920000	373660000	495200000	359960000	706790000	580440000	563860000	1295700000	198000000	157260000	142590000	202450000	147130000	116460000	143320000	151920000	120440000	157060000	100800000	160450000
P06753	Tropomyosin alpha-3 chain	TPM3	sp|P06753|TPM3_HUMAN Tropomyosin alpha-3 chain OS=Homo sapiens OX=9606 GN=TPM3 PE=1 SV=2	Homo sapiens	AADAEAEVASLNR;AADAEAEVASLNRR;AEQAEAEQKQAEER;AISEELDHALNDMTSI;AQERLATALQKLEEAEK;CSELEEELKNVTNNLK;EAETRAEFAER;HIAEEADRKYEEVAR;IQLVEEELDR;IQLVEEELDRAQER;IQLVEEELDRAQERLATALQK;KLVIIEGDLER;KLVIIEGDLERTEER;LATALQKLEEAEK;LATALQKLEEAEKAADESER;LDKENALDR;LEEAEKAADESER;MELQEIQLK;MELQEIQLKEAK;RIQLVEEELDR;RIQLVEEELDRAQER;SLEAQAEKYSQK;TIDDLEDELYAQK;TIDDLEDELYAQKLK;YKAISEELDHALNDMTSI;YSQKEDKYEEEIK	9606	26	11	0	68.1	32.95	842100000	91746000	70953000	45371000	30065000	110080000	70861000	73594000	84768000	90720000	16567000	90457000	66921000	32099000	22751000	26071000	14145000	49654000	20086000	22709000	25011000	40835000	4624900	24953000	21337000
Q6IRU2	Tropomyosin alpha-4 chain	Tpm4	sp|Q6IRU2|TPM4_MOUSE Tropomyosin alpha-4 chain OS=Mus musculus OX=10090 GN=Tpm4 PE=1 SV=3	Mus musculus	AEVSELKCGDLEEELKNVTNNLK;AGLNSLEAVKR;AQEQLATALQNLEEAEK;CGDLEEELK;CGDLEEELKNVTNNLK;EAETRAEFAER;EENVGLHQTLDQTLNELNCI;IQALQQQADDAEDRAQGLQR;KIQALQQQADDAEDRAQGLQR;KLVILEGELK	10090	10	4	4	45.6	28.467	139480000	0	3252500	5501300	9541800	59653000	11433000	2673500	10826000	18732000	6405800	7526000	3937800	0	3911800	4599300	4476400	16620000	4290400	3672100	3513700	8360200	5669600	3110100	3475400
Q9CRB6	Tubulin polymerization-promoting protein family member 3	Tppp3	sp|Q9CRB6|TPPP3_MOUSE Tubulin polymerization-promoting protein family member 3 OS=Mus musculus OX=10090 GN=Tppp3 PE=1 SV=1	Mus musculus	AASTDIAGLEESFR;AASTDIAGLEESFRK	10090	2	2	2	8.5	18.965	238090000	14797000	9254400	15131000	20163000	13166000	40906000	32590000	22803000	16059000	9020300	17965000	26230000	14013000	8094700	15773000	17681000	8386300	21630000	20752000	12955000	9679800	7399900	9931400	14029000
F6ZDS4	Nucleoprotein TPR	Tpr	sp|F6ZDS4|TPR_MOUSE Nucleoprotein TPR OS=Mus musculus OX=10090 GN=Tpr PE=1 SV=1	Mus musculus	SLQEQTVQLQSELSR	10090	1	1	1	0.6	273.99	14148000	0	1143000	0	0	0	4885400	0	600570	1891400	1676000	774170	3177400	0	878770	0	0	0	2017100	0	733190	1314400	1444300	776820	1548000
P21845	Tryptase beta-2	Tpsb2	sp|P21845|TRYB2_MOUSE Tryptase beta-2 OS=Mus musculus OX=10090 GN=Tpsb2 PE=1 SV=2	Mus musculus	DSCQGDSGGPLVCK;EQYLYYGDQLLSLNR;VPIVENSLCDR;VPIVENSLCDRK;VQLREQYLYYGDQLLSLNR	10090	5	5	4	16.3	30.927	85695000	3481700	12098000	3007400	10747000	4935700	2560100	4714200	4889700	11694000	4474200	11830000	11262000	2130300	5126500	2491400	5640700	1020700	1840100	1286900	1968600	4130700	2480100	4518900	4428700
P63028	Translationally-controlled tumor protein	Tpt1	sp|P63028|TCTP_MOUSE Translationally-controlled tumor protein OS=Mus musculus OX=10090 GN=Tpt1 PE=1 SV=1	Mus musculus	DLISHDELFSDIYKIR	10090	1	1	1	9.3	19.462	6027900	0	0	1044000	0	0	0	916090	1394900	537360	332030	0	1803500	0	0	998470	0	0	0	681890	862490	339040	402750	0	891140
Q8TD43	Transient receptor potential cation channel subfamily M member 4	TRPM4	sp|Q8TD43|TRPM4_HUMAN Transient receptor potential cation channel subfamily M member 4 OS=Homo sapiens OX=9606 GN=TRPM4 PE=1 SV=1	Homo sapiens	MVVPEKEQSWIPKIFK	9606	1	1	1	1.3	134.3	2116400	0	0	0	0	0	0	0	2116400	0	0	0	0	0	0	0	0	0	0	0	0	0	0	0	0
Q8BJU2	Tetraspanin-9	Tspan9	sp|Q8BJU2|TSN9_MOUSE Tetraspanin-9 OS=Mus musculus OX=10090 GN=Tspan9 PE=1 SV=1	Mus musculus	EGLLLYNTENNVGLK	10090	1	1	1	6.3	26.738	1215700	0	0	0	0	0	0	665250	0	550420	0	0	0	0	0	0	0	0	0	457340	0	347790	0	0	0
P52196	Thiosulfate sulfurtransferase	Tst	sp|P52196|THTR_MOUSE Thiosulfate sulfurtransferase OS=Mus musculus OX=10090 GN=Tst PE=1 SV=3	Mus musculus	VLDASWYSPGTR;YLGTQPEPDIVGLDSGHIR	10090	2	2	1	10.4	33.466	9506700	466310	395550	422340	0	0	1303900	1072300	0	611370	2884300	1081200	1269400	478560	371630	444050	0	0	607410	601720	0	410780	1613800	535110	570310
A2ASS6	Titin	Ttn	sp|A2ASS6|TITIN_MOUSE Titin OS=Mus musculus OX=10090 GN=Ttn PE=1 SV=1	Mus musculus	SAANLIVEEEDLR;STGLTDGIAYEFR	10090	2	2	1	0.1	3906.4	264360000	91974000	67255000	8215300	9036700	41477000	34578000	9272000	0	720770	1396300	434710	0	46494000	69098000	8611100	9498500	20906000	13726000	9332500	0	12359000	11538000	8867100	0
P68369	Tubulin alpha-1A chain	Tuba1a	sp|P68369|TBA1A_MOUSE Tubulin alpha-1A chain OS=Mus musculus OX=10090 GN=Tuba1a PE=1 SV=1;sp|P68373|TBA1C_MOUSE Tubulin alpha-1C chain OS=Mus musculus OX=10090 GN=Tuba1c PE=1 SV=1;sp|P05214|TBA3_MOUSE Tubulin alpha-3 chain OS=Mus musculus OX=10090 GN=Tuba3	Mus musculus	AVFVDLEPTVIDEVR;IHFPLATYAPVISAEK;LIGQIVSSITASLR;QLFHPEQLITGKEDAANNYAR;TIGGGDDSFNTFFSETGAGK;TIQFVDWCPTGFK;VGINYQPPTVVPGGDLAK	10090	7	7	0	25.9	50.135	412740000	7015100	34882000	36083000	14353000	21641000	74204000	32002000	19569000	58456000	21940000	60801000	31792000	3645200	11627000	19003000	6108000	7589700	17241000	10749000	6221300	14748000	11068000	16232000	9152300
P68366	Tubulin alpha-4A chain	TUBA4A	sp|P68366|TBA4A_HUMAN Tubulin alpha-4A chain OS=Homo sapiens OX=9606 GN=TUBA4A PE=1 SV=1	Homo sapiens	AVFVDLEPTVIDEIR;IHFPLATYAPVISAEK;QLFHPEQLITGKEDAANNYAR;VGINYQPPTVVPGGDLAK	9606	4	1	0	15.6	49.924	4113600	0	0	0	0	0	0	0	1284000	0	0	2308800	520820	0	0	0	0	0	0	0	795070	0	0	1245000	271710
P07437	Tubulin beta chain	TUBB	sp|P07437|TBB5_HUMAN Tubulin beta chain OS=Homo sapiens OX=9606 GN=TUBB PE=1 SV=2;sp|Q9BVA1|TBB2B_HUMAN Tubulin beta-2B chain OS=Homo sapiens OX=9606 GN=TUBB2B PE=1 SV=1;sp|Q13885|TBB2A_HUMAN Tubulin beta-2A chain OS=Homo sapiens OX=9606 GN=TUBB2A PE=1 SV=	Homo sapiens	AILVDLEPGTMDSVR;ALTVPELTQQVFDAK;GHYTEGAELVDSVLDVVR;GHYTEGAELVDSVLDVVRK;LHFFMPGFAPLTSR;NSSYFVEWIPNNVK;SGPFGQIFRPDNFVFGQSGAGNNWAK	9606	7	2	0	23.2	49.67	59584000	2485600	5682800	2802000	3043300	4215100	9988600	8622300	8030300	6296600	1977100	4520000	1920600	800200	1838300	3657200	2104700	1722600	3649000	2160900	3113000	3130800	2078800	2976500	1223600
P68371	Tubulin beta-4B chain	TUBB4B	sp|P68371|TBB4B_HUMAN Tubulin beta-4B chain OS=Homo sapiens OX=9606 GN=TUBB4B PE=1 SV=1;sp|P04350|TBB4A_HUMAN Tubulin beta-4A chain OS=Homo sapiens OX=9606 GN=TUBB4A PE=1 SV=2	Homo sapiens	ALTVPELTQQMFDAK;AVLVDLEPGTMDSVR;GHYTEGAELVDSVLDVVR;GHYTEGAELVDSVLDVVRK;LHFFMPGFAPLTSR;NSSYFVEWIPNNVK;REIVHLQAGQCGNQIGAK;SGPFGQIFRPDNFVFGQSGAGNNWAK	9606	8	8	0	27.2	49.83	552950000	10257000	24708000	32967000	14468000	47183000	101430000	61375000	59728000	41302000	24976000	116340000	18218000	4276100	10882000	18234000	10548000	16675000	23793000	20154000	19889000	16924000	12020000	22887000	6751800
Q12792	Twinfilin-1	TWF1	sp|Q12792|TWF1_HUMAN Twinfilin-1 OS=Homo sapiens OX=9606 GN=TWF1 PE=1 SV=3	Homo sapiens	SHQTGIQASEDVKEIFAR	9606	1	1	0	5.1	40.282	9756700	1978900	0	627940	644010	1019000	0	0	2057500	1153200	1268100	0	1007900	2019700	0	647640	600640	657430	0	0	1384800	703160	1053600	0	507420
O95881	Thioredoxin domain-containing protein 12	TXNDC12	sp|O95881|TXD12_HUMAN Thioredoxin domain-containing protein 12 OS=Homo sapiens OX=9606 GN=TXNDC12 PE=1 SV=1	Homo sapiens	DEDFSPDGGYIPR	9606	1	1	0	7.6	19.206	19665000	1037200	635300	604580	1061500	954710	3218900	2524500	1079600	1910100	1807400	2310300	2521300	880120	425220	581740	871800	669820	1946100	1821200	599290	1266500	1633000	1307300	1380300
Q91W90	Thioredoxin domain-containing protein 5	Txndc5	sp|Q91W90|TXND5_MOUSE Thioredoxin domain-containing protein 5 OS=Mus musculus OX=10090 GN=Txndc5 PE=1 SV=2	Mus musculus	EFPGLSDVTIAEVDCTAER;SFEDTIAQGITFVK;VDCTADSDVCSAQGVR	10090	3	3	3	11.8	46.415	19948000	914340	455870	2523700	501660	2179300	6296100	825820	5088300	0	0	1162900	0	464030	618120	2357000	192560	1072600	2284700	1017900	1106900	0	0	1251200	0
Q02053	Ubiquitin-like modifier-activating enzyme 1	Uba1	sp|Q02053|UBA1_MOUSE Ubiquitin-like modifier-activating enzyme 1 OS=Mus musculus OX=10090 GN=Uba1 PE=1 SV=1	Mus musculus	AAVASLLQSVQVPEFTPK;DEFEGLFKQPAENVNQYLTDSKFVER;DNPGVVTCLDEAR;GGIVSQVKVPK;IHVSDQELQSANASVDDSRLEELK;LAGTQPLEVLEAVQR;NEEDATELVGLAQAVNAR;QFLFRPWDVTK	10090	8	8	3	12.9	117.81	151770000	6216400	8455500	6909500	7391000	12747000	15150000	17564000	10644000	19386000	4814700	26929000	15560000	2600200	2177500	2627700	2280300	2600700	3367300	3460400	3242900	3403900	2329000	3978500	2378400
P62987	Ubiquitin-60S ribosomal protein L40	UBA52	sp|P62987|RL40_HUMAN Ubiquitin-60S ribosomal protein L40 OS=Homo sapiens OX=9606 GN=UBA52 PE=1 SV=2;sp|P62979|RS27A_HUMAN Ubiquitin-40S ribosomal protein S27a OS=Homo sapiens OX=9606 GN=RPS27A PE=1 SV=2;sp|P0CG47|UBB_HUMAN Polyubiquitin-B OS=Homo sapiens O	Homo sapiens	LIFAGKQLEDGR;LIFAGKQLEDGRTLSDYNIQK;TITLEVEPSDTIENVK	9606	3	3	0	28.9	14.728	62461000	2306600	894140	2225800	5434300	9178400	879970	11550000	5042300	9199800	520050	11376000	3853200	3466200	955270	1620900	2241800	9221900	701400	1392500	2539800	3079600	630560	2714000	3021000
P61088	Ubiquitin-conjugating enzyme E2 N	UBE2N	sp|P61088|UBE2N_HUMAN Ubiquitin-conjugating enzyme E2 N OS=Homo sapiens OX=9606 GN=UBE2N PE=1 SV=1;sp|Q5JXB2|UE2NL_HUMAN Putative ubiquitin-conjugating enzyme E2 N-like OS=Homo sapiens OX=9606 GN=UBE2NL PE=1 SV=1	Homo sapiens	TNEAQAIETAR	9606	1	1	0	7.2	17.138	14678000	814620	0	0	2416600	834830	0	1787900	1983000	2383200	1069900	1407200	1981200	814620	0	0	2335700	558160	0	1229100	1227900	1505900	921230	758830	1033600
Q13404	Ubiquitin-conjugating enzyme E2 variant 1	UBE2V1	sp|Q13404|UB2V1_HUMAN Ubiquitin-conjugating enzyme E2 variant 1 OS=Homo sapiens OX=9606 GN=UBE2V1 PE=1 SV=2	Homo sapiens	AATTGSGVKVPR	9606	1	1	0	8.2	16.495	78944000	2568900	0	1450700	1346900	4716100	18128000	6898200	7080000	7297000	10432000	15203000	3823000	2568900	0	1550500	1213700	3153100	10445000	4742400	4384200	4610700	8981900	8198400	1994500
Q8BLN6	Protein unc-80 homolog	Unc80	sp|Q8BLN6|UNC80_MOUSE Protein unc-80 homolog OS=Mus musculus OX=10090 GN=Unc80 PE=1 SV=2	Mus musculus	QDELMYMLR	10090	1	1	0	0.3	363.5	161290	0	0	161290	0	0	0	0	0	0	0	0	0	0	0	0	0	0	0	0	0	0	0	0	0
Q9D855	Cytochrome b-c1 complex subunit 7	Uqcrb	sp|Q9D855|QCR7_MOUSE Cytochrome b-c1 complex subunit 7 OS=Mus musculus OX=10090 GN=Uqcrb PE=1 SV=3	Mus musculus	DDTLHETEDVK;DDTLHETEDVKEAIR;DQWTKYEEDKFYLEPYLK	10090	3	3	3	29.7	13.527	81147000	8862300	11708000	3819200	8549000	10532000	16041000	5191500	3255100	4012400	505940	4214200	4456200	4671500	3357100	2746000	3892300	5022700	8477900	2371100	1896300	13930000	2256100	2147500	2082400
Q9CZ13	Cytochrome b-c1 complex subunit 1, mitochondrial	Uqcrc1	sp|Q9CZ13|QCR1_MOUSE Cytochrome b-c1 complex subunit 1, mitochondrial OS=Mus musculus OX=10090 GN=Uqcrc1 PE=1 SV=2	Mus musculus	DICSKYFYDQCPAVAGYGPIEQLPDYNRIR;IPLAEWESR;LCTSATESEVTR;MVLAAAGGVEHQQLLDLAQKHLSSVSR;NALVSHLDGTTPVCEDIGR;VVELLADIVQNSSLEDSQIEK;VVELLADIVQNSSLEDSQIEKER;VYEEDAVPGLTPCR;VYEEDAVPGLTPCRFTGSEIR;YFYDQCPAVAGYGPIEQLPDYNRIR	10090	10	10	8	29.4	52.851	193790000	2959600	9390300	3554000	14450000	7907200	34700000	26693000	9397400	13730000	27914000	27606000	15493000	1433000	2402200	1296200	9009700	4829300	5352000	7445300	4823500	4433300	6757000	9886200	4408400
Q9DB77	Cytochrome b-c1 complex subunit 2, mitochondrial	Uqcrc2	sp|Q9DB77|QCR2_MOUSE Cytochrome b-c1 complex subunit 2, mitochondrial OS=Mus musculus OX=10090 GN=Uqcrc2 PE=1 SV=1	Mus musculus	AGSRYEDSNNLGTSHLLR;AVAQGNLSSADVQAAK;GNNTTSLLSQSVAK;IIENLHDVAYKNALANPLYCPDYR;NALANPLYCPDYR;RGNNTTSLLSQSVAK;SMAASGNLGHTPFLDEL;VKTSAAPGGVPLQPQDLEFTKLPNGLVIASLENYAPLSR	10090	8	8	7	28.5	48.234	256850000	4655100	16564000	16874000	8348800	20884000	46544000	11771000	30243000	15803000	45266000	24225000	15673000	3221600	5242200	5717900	4939900	3754400	9082400	3840400	10595000	3046600	21336000	5108500	3600700
Q9CR68	Cytochrome b-c1 complex subunit Rieske, mitochondrial	Uqcrfs1	sp|Q9CR68|UCRI_MOUSE Cytochrome b-c1 complex subunit Rieske, mitochondrial OS=Mus musculus OX=10090 GN=Uqcrfs1 PE=1 SV=1	Mus musculus	EIDQEAAVEVSQLR;EIDQEAAVEVSQLRDPQHDLDR;SGPFAPVLSATSR	10090	3	3	2	12.8	29.367	94024000	3478400	12358000	1022600	1791800	8517300	8535100	9222000	21569000	4575500	7929800	6222200	8802000	2121400	4582500	1425000	2257900	3387000	3077300	5948500	11791000	1189200	3778900	2654500	2426300
P99028	Cytochrome b-c1 complex subunit 6, mitochondrial	Uqcrh	sp|P99028|QCR6_MOUSE Cytochrome b-c1 complex subunit 6, mitochondrial OS=Mus musculus OX=10090 GN=Uqcrh PE=1 SV=2	Mus musculus	ERLELCDNRVSSR;SQTEEDCTEELFDFLHAR	10090	2	2	2	34.8	10.435	186260000	8026700	8304000	7175500	0	22864000	13670000	13868000	6004300	31181000	11547000	49254000	14363000	5840600	9736800	5739600	0	13020000	4941100	3958000	4878400	17146000	7329300	11448000	5507200
P46939	Utrophin	UTRN	sp|P46939|UTRO_HUMAN Utrophin OS=Homo sapiens OX=9606 GN=UTRN PE=1 SV=2	Homo sapiens	LEDSSNQVTQAVAK	9606	1	1	1	0.4	394.46	5672000	678720	0	1731700	293020	0	0	1600400	0	549730	0	0	818330	838880	0	1780200	231150	0	0	1205200	0	283500	0	0	348440
P63024	Vesicle-associated membrane protein 3	Vamp3	sp|P63024|VAMP3_MOUSE Vesicle-associated membrane protein 3 OS=Mus musculus OX=10090 GN=Vamp3 PE=1 SV=1;sp|P63044|VAMP2_MOUSE Vesicle-associated membrane protein 2 OS=Mus musculus OX=10090 GN=Vamp2 PE=1 SV=2	Mus musculus	ADALQAGASQFETSAAK;STGVPSGSSAATGSNRR	10090	2	2	1	33	11.48	38107000	9257300	1742500	0	1896400	0	1890400	12330000	0	0	4112600	818760	6059000	3304000	5295900	0	1919100	0	4965700	7116500	0	0	2043400	1600700	1930700
O95292	Vesicle-associated membrane protein-associated protein B/C	VAPB	sp|O95292|VAPB_HUMAN Vesicle-associated membrane protein-associated protein B/C OS=Homo sapiens OX=9606 GN=VAPB PE=1 SV=3	Homo sapiens	AKVEQVLSLEPQHELK	9606	1	1	0	6.6	27.228	39355000	5254600	1739800	1930900	1638100	2634900	4045800	7928100	0	2261500	2297400	4555300	5068700	5254600	1236900	2063800	1583300	1761600	2331000	5450400	0	1429000	1978100	2456500	2644400
Q9Z1Q9	Valine--tRNA ligase	Vars	sp|Q9Z1Q9|SYVC_MOUSE Valine--tRNA ligase OS=Mus musculus OX=10090 GN=Vars1 PE=1 SV=1	Mus musculus	SILYVSPHPDAFPSLR	10090	1	1	1	1.3	140.21	7088100	276350	579430	0	314480	955040	1229300	0	761100	0	1953600	0	1018800	276300	411860	0	303900	627150	708100	0	483420	0	1681800	0	531420
P13611	Versican core protein	VCAN	sp|P13611|CSPG2_HUMAN Versican core protein OS=Homo sapiens OX=9606 GN=VCAN PE=1 SV=3	Homo sapiens	AQCGGGLLGVR;LATVGELQAAWR	9606	2	2	0	0.7	372.82	21828000	1331300	829280	736970	1486200	0	0	1724600	1185600	4373400	915660	3999400	5245800	1408600	689400	856720	1344400	0	0	1164200	812650	1431600	834190	1515400	1349500
P18206	Vinculin	VCL	sp|P18206|VINC_HUMAN Vinculin OS=Homo sapiens OX=9606 GN=VCL PE=1 SV=4	Homo sapiens	AAAVGTANKSTVEGIQASVKTAR;AQQVSQGLDVLTAK;GILSGTSDLLLTFDEAEVRK;LTDELAPPKPPLPEGEVPPPRPPPPEEK;LVQAAQMLQSDPYSVPARDYLIDGSR;MSAEINEIIR;NQGIEEALKNR;TNLLQVCERIPTISTQLK;VGKETVQTTEDQILKR;WIDNPTVDDRGVGQAAIR	9606	10	10	0	16.2	123.8	961110000	190780000	94596000	18760000	56515000	59846000	45492000	32327000	65229000	117030000	138010000	81665000	60860000	43738000	47475000	45661000	36820000	38025000	29771000	30692000	38278000	64729000	52328000	43363000	35675000
P55072	Transitional endoplasmic reticulum ATPase	VCP	sp|P55072|TERA_HUMAN Transitional endoplasmic reticulum ATPase OS=Homo sapiens OX=9606 GN=VCP PE=1 SV=4	Homo sapiens	AFEEAEKNAPAIIFIDELDAIAPKR;ASGADSKGDDLSTAILK;ASGADSKGDDLSTAILKQK;EDEEESLNEVGYDDIGGCRK;ESIESEIRR;ETVVEVPQVTWEDIGGLEDVKR;EVDIGIPDATGRLEILQIHTK;LADDVDLEQVANETHGHVGADLAALCSEAALQAIR;LAGESESNLR;LAGESESNLRK;LGDVISIQPCPDVK;LIVDEAINEDNSVVSLSQPK;NRPNRLIVDEAINEDNSVVSLSQPK;QAAPCVLFFDELDSIAKAR;RIVSQLLTLMDGLKQR;WALSQSNPSALR	9606	16	16	0	30.8	89.321	589450000	24568000	44114000	48001000	31467000	34595000	90367000	58929000	43758000	51667000	42228000	61950000	57807000	11304000	9166400	16223000	10298000	10551000	12789000	15775000	10294000	14163000	9429800	13025000	10477000
P21796	Voltage-dependent anion-selective channel protein 1	VDAC1	sp|P21796|VDAC1_HUMAN Voltage-dependent anion-selective channel protein 1 OS=Homo sapiens OX=9606 GN=VDAC1 PE=1 SV=2	Homo sapiens	AVPPTYADLGKSAR;DVFTKGYGFGLIKLDLK;VTQSNFAVGYK	9606	3	3	1	14.8	30.772	56699000	1437000	6667200	1670800	4806600	1231100	14832000	1445000	3115400	3690500	10215000	1672400	5915800	1592800	1764200	841270	4356300	1098500	5492700	1387900	818330	570300	5279000	1167500	1843200
Q60931	Voltage-dependent anion-selective channel protein 3	Vdac3	sp|Q60931|VDAC3_MOUSE Voltage-dependent anion-selective channel protein 3 OS=Mus musculus OX=10090 GN=Vdac3 PE=1 SV=1	Mus musculus	LSQNNFALGYK	10090	1	1	0	3.9	30.752	12715000	0	1438900	0	1715900	0	4378000	0	920890	0	3523700	737820	0	0	897410	0	1687500	0	2566600	0	562270	0	3087200	404840	0
P20152	Vimentin	Vim	sp|P20152|VIME_MOUSE Vimentin OS=Mus musculus OX=10090 GN=Vim PE=1 SV=3	Mus musculus	DGQVINETSQHHDDLE;DVRQQYESVAAK;DVRQQYESVAAKNLQEAEEWYK;EEAESTLQSFR;EEAESTLQSFRQDVDNASLAR;EEAESTLQSFRQDVDNASLARLDLER;EKLQEEMLQR;ELRRQVDQLTNDK;ETNLESLPLVDTHSK;ETNLESLPLVDTHSKR;FADLSEAANR;FADLSEAANRNNDALR;FADLSEAANRNNDALRQAK;FANYIDKVR;FLEQQNKILLAELEQLKGQGK;HLREYQDLLNVK;ILLAELEQLKGQGK;ISLPLPTFSSLNLR;ISLPLPTFSSLNLRETNLESLPLVDTHSKR;KLLEGEESR;KVESLQEEIAFLK;KVESLQEEIAFLKK;LGDLYEEEMR;LHDEEIQELQAQIQEQHVQIDVD…	10090	55	55	8	73.2	53.687	16295000000	1348400000	1080500000	907210000	950900000	1937700000	1343800000	969710000	1509500000	1856500000	635140000	1909600000	1846300000	237930000	128520000	194100000	183690000	257480000	126960000	140250000	143170000	176770000	92915000	190110000	184740000
Q9EQH3	Vacuolar protein sorting-associated protein 35	Vps35	sp|Q9EQH3|VPS35_MOUSE Vacuolar protein sorting-associated protein 35 OS=Mus musculus OX=10090 GN=Vps35 PE=1 SV=1	Mus musculus	SDDPDQQYLILNTAR	10090	1	1	1	1.9	91.712	3858800	0	0	688300	0	0	0	0	0	701480	462500	1032000	974530	0	0	733620	0	0	0	0	0	442000	397100	552790	516560
P29788	Vitronectin	Vtn	sp|P29788|VTNC_MOUSE Vitronectin OS=Mus musculus OX=10090 GN=Vtn PE=1 SV=2	Mus musculus	LIQDVWGIEGPIDAAFTR	10090	1	1	1	3.8	54.848	6354700	0	722610	1009200	1388800	0	0	665180	0	1675100	0	0	893800	0	513730	1078700	1342300	0	0	457290	0	1058400	0	0	466300
Q8R2Z5	von Willebrand factor A domain-containing protein 1	Vwa1	sp|Q8R2Z5|VWA1_MOUSE von Willebrand factor A domain-containing protein 1 OS=Mus musculus OX=10090 GN=Vwa1 PE=1 SV=1	Mus musculus	SLRVSWAPALGPDSALGYHVQLGPLQGGSLER	10090	1	1	1	7.7	44.708	2395900	0	0	0	0	0	2395900	0	0	0	0	0	0	0	0	0	0	0	0	0	0	0	0	0	0
Q8CIZ8	von Willebrand factor	Vwf	sp|Q8CIZ8|VWF_MOUSE von Willebrand factor OS=Mus musculus OX=10090 GN=Vwf PE=1 SV=2	Mus musculus	AFLLSGVDELEQR;LSSETFGFAAR	10090	2	2	2	0.9	309.27	36416000	9751700	114990	281050	0	503500	1183500	884860	22863000	0	57938	0	775540	7406800	25917	522090	0	66583	1040100	116140	15060000	0	18645	0	801180
O88342	WD repeat-containing protein 1	Wdr1	sp|O88342|WDR1_MOUSE WD repeat-containing protein 1 OS=Mus musculus OX=10090 GN=Wdr1 PE=1 SV=3	Mus musculus	CFSIDNPGYEPEVVAVHPGGDTVAVGGTDGNVR;VYSILASTLKDEGK	10090	2	2	2	7.8	66.406	20004000	0	338640	796710	2023500	745270	1959300	836830	2013700	1018400	871980	4391100	5008100	0	334480	1036200	731680	577160	1065800	700070	1148400	699220	784930	1091600	1946000
Q8TBZ3	WD repeat-containing protein 20	WDR20	sp|Q8TBZ3|WDR20_HUMAN WD repeat-containing protein 20 OS=Homo sapiens OX=9606 GN=WDR20 PE=1 SV=2	Homo sapiens	MATEGGGKEMNEIKTQFTTR	9606	1	1	1	3.5	62.892	15185000	0	0	0	0	3651200	0	11534000	0	0	0	0	0	0	0	0	0	0	0	0	0	0	0	0	0
O70373	Xin actin-binding repeat-containing protein 1	Xirp1	sp|O70373|XIRP1_MOUSE Xin actin-binding repeat-containing protein 1 OS=Mus musculus OX=10090 GN=Xirp1 PE=1 SV=2	Mus musculus	ADAQMQVAPTPTIQMR;QETAAERTLR	10090	2	2	2	2.3	123.43	14421000	0	1131900	4111700	1054100	0	0	0	6237200	0	0	0	1885900	0	0	1553400	1038600	0	0	0	4531600	0	0	0	1020600
Q8N9L7	Putative uncharacterized protein FLJ36925	YV006	sp|Q8N9L7|YV006_HUMAN Putative uncharacterized protein FLJ36925 OS=Homo sapiens OX=9606 PE=5 SV=1	Homo sapiens	TMTMSYKAIEKIPR	9606	1	1	1	11.7	13.535	198200000	7253400	31954000	0	1512600	56075000	6337400	1698700	4042600	8741900	0	34003000	46580000	5314900	38426000	0	1827100	15889000	3363300	1572900	2615000	4432200	0	9862900	41105000
Q9CQV8	14-3-3 protein beta/alpha	Ywhab	sp|Q9CQV8|1433B_MOUSE 14-3-3 protein beta/alpha OS=Mus musculus OX=10090 GN=Ywhab PE=1 SV=3	Mus musculus	AVTEQGHELSNEER;NLLSVAYKNVVGAR;NLLSVAYKNVVGARR;QTTVSNSQQAYQEAFEISK;QTTVSNSQQAYQEAFEISKK;SSWRVISSIEQK;YLSEVASGENKQTTVSNSQQAYQEAFEISKK	10090	7	4	1	29.3	28.086	91459000	6480900	9725700	11451000	5910600	2076000	10467000	7296100	14419000	11761000	3489600	3396200	4986600	6584300	4365000	5043200	1651700	1101500	2969100	7255200	9344100	3513100	1984800	1571300	1736200
P62258	14-3-3 protein epsilon	YWHAE	sp|P62258|1433E_HUMAN 14-3-3 protein epsilon OS=Homo sapiens OX=9606 GN=YWHAE PE=1 SV=1	Homo sapiens	EAAENSLVAYK;MDDREDLVYQAK;NLLSVAYKNVIGAR;YLAEFATGNDRK;YLAEFATGNDRKEAAENSLVAYK	9606	5	5	0	19.2	29.174	181220000	4515000	11600000	20481000	8977700	12198000	8617900	9724700	21792000	19394000	10976000	33346000	19601000	3794800	5656600	11727000	6263000	6347500	3795900	4640700	10712000	6751400	6871600	5922300	5938400
P61981	14-3-3 protein gamma	YWHAG	sp|P61981|1433G_HUMAN 14-3-3 protein gamma OS=Homo sapiens OX=9606 GN=YWHAG PE=1 SV=2	Homo sapiens	AYSEAHEISK;NLLSVAYKNVVGAR;NLLSVAYKNVVGARR;NVTELNEPLSNEER;SSWRVISSIEQK;VDREQLVQK;VDREQLVQKAR;YLAEVATGEKR	9606	8	6	0	29.6	28.302	528790000	40549000	31042000	17698000	8011900	27224000	130600000	51093000	22129000	45495000	53900000	85020000	16025000	45335000	28154000	14054000	6796300	10093000	28605000	13928000	6419900	14975000	18693000	17947000	8233300
P68510	14-3-3 protein eta	Ywhah	sp|P68510|1433F_MOUSE 14-3-3 protein eta OS=Mus musculus OX=10090 GN=Ywhah PE=1 SV=2	Mus musculus	AVTELNEPLSNEDR;AVTELNEPLSNEDRNLLSVAYKNVVGAR;GDREQLLQR;NLLSVAYKNVVGAR;NLLSVAYKNVVGARR;NSVVEASEAAYK;NSVVEASEAAYKEAFEISK;SSWRVISSIEQK	10090	8	5	0	28	28.211	154650000	9668800	5719500	6853100	35955000	12516000	13123000	1301500	5472100	21740000	5989700	17124000	19188000	4134800	4412200	7979400	16203000	9793000	8431700	4723100	12528000	6526500	4353500	9384000	7352800
P68254	14-3-3 protein theta	Ywhaq	sp|P68254|1433T_MOUSE 14-3-3 protein theta OS=Mus musculus OX=10090 GN=Ywhaq PE=1 SV=1	Mus musculus	AVTEQGAELSNEER;KQTIENSQGAYQEAFDISKK;NLLSVAYKNVVGGR;QTIENSQGAYQEAFDISKK	10090	4	4	2	19.6	27.778	160260000	2261200	6277600	6192600	13762000	5360800	48084000	3231600	5576600	16582000	5004800	13946000	33979000	2822200	4813500	6445900	11702000	4092900	17717000	2563200	3556000	6514200	4410300	8195300	12564000
P63101	14-3-3 protein zeta/delta	Ywhaz	sp|P63101|1433Z_MOUSE 14-3-3 protein zeta/delta OS=Mus musculus OX=10090 GN=Ywhaz PE=1 SV=1	Mus musculus	GIVDQSQQAYQEAFEISK;GIVDQSQQAYQEAFEISKK;NLLSVAYKNVVGAR;NLLSVAYKNVVGARR;SSWRVVSSIEQK;SVTEQGAELSNEER;SVTEQGAELSNEERNLLSVAYK;SVTEQGAELSNEERNLLSVAYKNVVGAR;YLAEVAAGDDKK;YLAEVAAGDDKKGIVDQSQQAYQEAFEISK	10090	10	10	0	29.4	27.771	1044100000	66731000	109420000	51047000	96602000	68648000	130310000	79854000	47073000	83888000	50995000	131650000	127840000	26325000	19556000	32053000	19937000	18425000	31352000	22774000	14992000	23529000	23124000	29263000	26706000
Q62523	Zyxin	Zyx	sp|Q62523|ZYX_MOUSE Zyxin OS=Mus musculus OX=10090 GN=Zyx PE=1 SV=2	Mus musculus	AAPRPPPAISVSVSAPAFYAPQKK;CNTCGQPITDR;FAPVVAPKPK	10090	3	3	2	8	60.545	15528000	2985900	1016500	649590	496910	1373700	983490	742250	1629200	721710	0	839430	4089100	983140	961320	923580	638880	441270	753750	678790	1342000	606620	0	602140	673420

## Sheet: Table S3
	Supplementary Table S3: Total retinal proteins
Majority protein IDs	Protein names	Gene names	Fasta headers	Species	Peptide sequences	Taxonomy IDs	Peptides	Razor + unique peptides	Unique peptides	Sequence coverage [%]	Mol. weight [kDa]	Intensity	Intensity Retina_KO ω3_01	Intensity Retina_KO ω3_02	Intensity Retina_KO ω3_03	Intensity Retina_KO ω3_04	Intensity Retina_KO ω3_05	Intensity Retina_KO ω3_06	Intensity Retina_KO ω3_07	Intensity Retina_KO ω3_08	Intensity Retina_KO ω3_09	Intensity Retina_KO PBS_01	Intensity Retina_KO PBS_02	Intensity Retina_KO PBS_03	Intensity Retina_KO PBS_04	Intensity Retina_KO PBS_05	Intensity Retina_KO PBS_06	Intensity Retina_KO PBS_07	Intensity Retina_KO PBS_08	Intensity Retina_KO PBS_09	Intensity Retina_fl ω3_01	Intensity Retina_fl ω3_02	Intensity Retina_fl ω3_03	Intensity Retina_fl ω3_04	Intensity Retina_fl ω3_05	Intensity Retina_fl ω3_06	Intensity Retina_fl ω3_07	Intensity Retina_fl ω3_08	Intensity Retina_fl ω3_09	Intensity Retina_fl PBS_01	Intensity Retina_fl PBS_02	Intensity Retina_fl PBS_03	Intensity Retina_fl PBS_04	Intensity Retina_fl PBS_05	Intensity Retina_fl PBS_06	Intensity Retina_fl PBS_07	Intensity Retina_fl PBS_08	Intensity Retina_fl PBS_09	LFQ Intensity Retina_KO ω3_01
Q3UHJ0	AP2-associated protein kinase 1	Aak1	sp|Q3UHJ0|AAK1_MOUSE AP2-associated protein kinase 1 OS=Mus musculus OX=10090 GN=Aak1 PE=1 SV=2	Mus musculus	AAEDSNLISGFGVAEGSEK;AGQTQPNPGILPIQPALTPR;EQGSSGLGSGSSGGGGSSSGLGSGYIGR;ILSDVTHSAVFGVPASK;LTDPIPTTETSIAPR;NSSGSSESSLPNLAR;TSQQNVSNASEGSTWNPFDDDNFSKLTAEELLNKDFAK;VAEDEFDPIPVLITK	10090	8	8	3	17.4	103.35	731550000	31206000	32992000	19946000	22943000	13938000	32482000	22223000	24165000	16039000	13545000	16998000	22459000	16038000	15123000	16231000	17553000	19769000	28383000	37013000	12759000	22011000	17918000	25564000	19326000	19515000	16548000	12274000	15671000	9753900	9996900	17343000	25901000	14145000	27195000	22734000	23852000	10168000
Q8BGQ7	Alanine--tRNA ligase, cytoplasmic	Aars	sp|Q8BGQ7|SYAC_MOUSE Alanine--tRNA ligase, cytoplasmic OS=Mus musculus OX=10090 GN=Aars1 PE=1 SV=1	Mus musculus	ALNEALKLFK;DIINEEEVQFLK;IVAVTGAEAQK;QIWQNLGLDEAR	10090	4	4	1	4.6	106.91	228130000	12760000	5912200	10945000	5638200	5287300	5138700	10567000	6979800	6090400	10321000	2214200	4807900	3599800	7495000	1923000	8262800	5253900	6121400	12451000	8133600	9857600	5877700	5800400	5051000	5569200	5221400	6429500	3995100	5643900	0	3398800	8505600	2256000	6439300	7065900	7116800	8354800
Q3THG9	Alanyl-tRNA editing protein Aarsd1	Aarsd1	sp|Q3THG9|AASD1_MOUSE Alanyl-tRNA editing protein Aarsd1 OS=Mus musculus OX=10090 GN=Aarsd1 PE=1 SV=2	Mus musculus	ELSLDDPEVEQVR;RAEAQALLQDYVSTQSAEE	10090	2	2	2	7.8	44.97	174990000	4054600	3593100	5325600	2761000	0	3615100	9612700	11473000	5300700	4265800	4291200	5173000	3277200	3001000	6515400	4491200	5615900	7006600	5635300	3487100	1388800	1562300	4805000	5636500	11934000	7000600	2646900	6084800	2160100	1693700	3668500	6262500	10667000	0	5660000	5327900	2561600
P61922	4-aminobutyrate aminotransferase, mitochondrial	Abat	sp|P61922|GABT_MOUSE 4-aminobutyrate aminotransferase, mitochondrial OS=Mus musculus OX=10090 GN=Abat PE=1 SV=1	Mus musculus	AIHKIDIPSFDWPIAPFPR;CLEEVEDLIVK;GNYLVDVDGNR;GTFCSFDTPDEAIR;GTFCSFDTPDEAIRNKLILIAR;LKYPLEEFTTDNQQEEAR;MLDLYSQISSVPIGYNHPALAK;NKGVVLGGCGDK;NKGVVLGGCGDKSIR;QLNTIQNAEAVHFFCNYEESR;TVAGIIVEPIQSEGGDNHASDDFFR;VGKTLLTGLLDLQAQYPQFISR	10090	12	12	6	37.2	56.451	2148200000	90282000	67643000	37835000	49636000	46217000	44430000	74189000	71283000	83459000	114310000	29913000	86695000	85299000	29856000	47392000	64384000	54838000	74840000	75976000	66899000	29916000	42153000	60191000	71091000	45636000	60534000	59190000	63743000	40144000	26624000	47262000	33826000	54745000	65238000	60142000	92368000	23592000
O35600	Retinal-specific ATP-binding cassette transporter	Abca4	sp|O35600|ABCA4_MOUSE Retinal-specific phospholipid-transporting ATPase ABCA4 OS=Mus musculus OX=10090 GN=Abca4 PE=2 SV=1	Mus musculus	ELPGLVPGVCVK;EQAGLRHPCSAPTEK;FWGGILSDLSPR;ILFTPDSPAAR;LCVGVRPGECFGLLGVNGAGK;MLTGDTTVTSGDATVAGK;TTSFCNSLIQSLESNPLTK;VYSGSSSPAVDR	10090	8	8	6	5.2	260.21	563850000	13426000	16852000	20306000	22560000	18253000	14515000	27188000	17478000	15798000	18135000	17673000	19759000	12041000	6924000	17192000	12401000	12900000	13892000	20794000	13364000	13605000	12205000	26267000	13469000	17355000	11307000	20905000	11335000	13457000	11955000	7187700	13884000	12258000	9272300	22811000	15125000	3805700
P21439	Multidrug resistance protein 3	ABCB4	sp|P21439|MDR3_HUMAN Phosphatidylcholine translocator ABCB4 OS=Homo sapiens OX=9606 GN=ABCB4 PE=1 SV=2	Homo sapiens	ELEAAGKIATEAIENIR	9606	1	1	1	1.3	141.52	1303700000	0	99930000	55840000	62857000	25162000	31841000	0	0	48101000	59876000	41643000	55397000	20576000	0	89777000	0	66330000	25081000	47603000	0	77458000	0	65711000	0	0	52483000	53380000	0	0	0	0	0	224220000	0	57168000	43297000	0
Q99LR1	Monoacylglycerol lipase ABHD12	Abhd12	sp|Q99LR1|ABD12_MOUSE Lysophosphatidylserine lipase ABHD12 OS=Mus musculus OX=10090 GN=Abhd12 PE=1 SV=2	Mus musculus	CAASGSSSSGSAAAALDADCSLKQNLR;ETPPDALILESPFTNIR	10090	2	2	1	11.1	45.269	42271000	0	0	0	0	0	0	3525200	0	0	0	0	1447200	0	0	0	0	0	1295100	0	6256400	0	0	0	0	0	1402500	4454500	1064900	0	0	0	0	1693000	1746600	7966500	11419000	0
P00519	Tyrosine-protein kinase ABL1	ABL1	sp|P00519|ABL1_HUMAN Tyrosine-protein kinase ABL1 OS=Homo sapiens OX=9606 GN=ABL1 PE=1 SV=4	Homo sapiens	GAGEEEGRDISNGALAFTPLDTADPAK	9606	1	1	1	2.4	122.87	347760000	6067800	6280300	7754400	7635500	4279900	31381000	9403300	14202000	3662100	0	0	17332000	0	0	9161400	0	21736000	0	8110900	8249800	24325000	3737200	0	4140700	45239000	13585000	9295400	0	2929400	0	8966700	7800400	26525000	0	39013000	6942800	4730400
Q8K4G5	Actin-binding LIM protein 1	Ablim1	sp|Q8K4G5|ABLM1_MOUSE Actin-binding LIM protein 1 OS=Mus musculus OX=10090 GN=Ablim1 PE=1 SV=1	Mus musculus	AIYDIERPDLITYEPFYTSGYEDK;EEDEEELLR	10090	2	2	2	3.8	96.804	84723000	2135000	4918100	658170	3025400	3829300	2491400	507770	5475900	4448600	477960	2571500	0	2162300	1397900	4529400	0	0	3460600	797990	2160300	5186600	2577400	0	5425600	2234600	2495700	1642300	1397500	2038500	0	1770400	1786700	3238000	620280	3088000	6174000	1955100
Q921H8	3-ketoacyl-CoA thiolase A, peroxisomal	Acaa1a	sp|Q921H8|THIKA_MOUSE 3-ketoacyl-CoA thiolase A, peroxisomal OS=Mus musculus OX=10090 GN=Acaa1a PE=1 SV=1;sp|Q8VCH0|THIKB_MOUSE 3-ketoacyl-CoA thiolase B, peroxisomal OS=Mus musculus OX=10090 GN=Acaa1b PE=1 SV=1	Mus musculus	IAQFLSGIPETVPLSTVNR	10090	1	1	1	4.5	43.953	50491000	0	2004000	0	2712900	1263200	1461800	2491400	861780	0	0	1766600	1848900	0	0	4415600	2955200	1890300	3154100	0	0	2911100	986690	1407800	1301100	0	2429100	2137700	0	1266700	3064300	0	2351800	0	2024700	1489600	2294500	0
Q8BWT1	3-ketoacyl-CoA thiolase, mitochondrial	Acaa2	sp|Q8BWT1|THIM_MOUSE 3-ketoacyl-CoA thiolase, mitochondrial OS=Mus musculus OX=10090 GN=Acaa2 PE=1 SV=3	Mus musculus	ALDLDPSKTNVSGGAIALGHPLGGSGSR;DFSATDLTEFAAR;EDCDRYALQSQQR;VGVPTETGALTLNR	10090	4	4	4	17.1	41.829	218470000	23660000	3097800	31147000	486020	2965100	4094200	12128000	12579000	4502400	6444600	4891900	0	1617700	0	8061500	7173400	13809000	2740200	5635500	2011600	1992000	2994200	3345100	10232000	1655600	5128500	2280800	1560400	2676300	5531500	3691400	3798800	2567500	8010700	12935000	3026700	12683000
Q9D7B6	Isobutyryl-CoA dehydrogenase, mitochondrial	Acad8	sp|Q9D7B6|ACAD8_MOUSE Isobutyryl-CoA dehydrogenase, mitochondrial OS=Mus musculus OX=10090 GN=Acad8 PE=1 SV=2	Mus musculus	FASYCLTEPGSGSDAASLLTSAK	10090	1	1	0	5.6	45.019	32567000	2969500	1933200	0	0	0	0	4018300	1433500	1608900	0	1373800	0	0	0	0	0	0	0	0	3527400	0	0	0	0	2017900	1963200	0	0	0	830010	0	0	0	3060400	3043900	4786600	2900900
Q8JZN5	Acyl-CoA dehydrogenase family member 9, mitochondrial	Acad9	sp|Q8JZN5|ACAD9_MOUSE Complex I assembly factor ACAD9, mitochondrial OS=Mus musculus OX=10090 GN=Acad9 PE=1 SV=2	Mus musculus	AYICAHPLDR;ELFLGNIEQK;FFTEEVDSR;KIDQEGKIPVDTLEK	10090	4	4	2	7	68.721	270760000	13101000	7610000	11229000	2448700	5992800	10076000	10019000	11302000	9178400	1947200	14425000	1336000	4346800	3548300	14165000	2952200	4978600	0	12419000	1502100	9412800	4616300	8013900	1865200	12437000	15028000	4090700	6143800	2509900	2722300	5568300	17137000	6605600	11122000	5966200	14945000	5159900
P45952	Medium-chain specific acyl-CoA dehydrogenase, mitochondrial	Acadm	sp|P45952|ACADM_MOUSE Medium-chain specific acyl-CoA dehydrogenase, mitochondrial OS=Mus musculus OX=10090 GN=Acadm PE=1 SV=1	Mus musculus	AFTGFIVEADTPGIHIGKK;EEIIPVAPEYDK;ENVLIGEGAGFK;KGDEYVINGQK;TRPTVAAGAVGLAQR	10090	5	5	5	16.4	46.481	454500000	28525000	11659000	18742000	10791000	19047000	4013200	16928000	11022000	15369000	20186000	3519000	17628000	11355000	6759100	9511600	4932400	7106600	22087000	10530000	9029000	7085200	5103700	8764800	18408000	9347900	18645000	11449000	15719000	11114000	7258500	12531000	19271000	12168000	9712900	16424000	12760000	7222500
P45954	Short/branched chain specific acyl-CoA dehydrogenase, mitochondrial	ACADSB	sp|P45954|ACDSB_HUMAN Short/branched chain specific acyl-CoA dehydrogenase, mitochondrial OS=Homo sapiens OX=9606 GN=ACADSB PE=1 SV=1	Homo sapiens	IGTIYEGASNIQLNTIAK	9606	1	1	0	4.2	47.485	119390000	12595000	2606800	7974800	1859800	4208100	1627400	4276800	6052200	1793300	2595300	4469400	1389100	0	8175500	2959800	4736300	2303100	2359400	2477600	4737600	10644000	0	1431100	4643600	2599300	3584300	3191500	3827600	1500700	0	0	0	0	1941400	1954600	4872400	11766000
Q8QZT1	Acetyl-CoA acetyltransferase, mitochondrial	Acat1	sp|Q8QZT1|THIL_MOUSE Acetyl-CoA acetyltransferase, mitochondrial OS=Mus musculus OX=10090 GN=Acat1 PE=1 SV=1	Mus musculus	EVYMGNVIQGGEGQAPTR;FASEITPITISVK;GATPYGGVKLEDLIVK;LGTAAIQGAIEK;LNVKPLAR;QEQDTYALSSYTR;SKEAWDAGK;SKEAWDAGKFASEITPITISVK;TPIGSFLGSLASQPATK;TVFQKENGTITAANASTLNDGAAALVLMTAEAAQR	10090	10	10	10	33.3	44.816	2811500000	109690000	46929000	80763000	61548000	43795000	96269000	95529000	69851000	65043000	84941000	77090000	58032000	43952000	50065000	113070000	65496000	58353000	33370000	138360000	57797000	99129000	59788000	81503000	144520000	70915000	94523000	43401000	41738000	64537000	44512000	52174000	61005000	107110000	147530000	120890000	128320000	29591000
Q8CAY6	Acetyl-CoA acetyltransferase, cytosolic	Acat2	sp|Q8CAY6|THIC_MOUSE Acetyl-CoA acetyltransferase, cytosolic OS=Mus musculus OX=10090 GN=Acat2 PE=1 SV=2	Mus musculus	AKVAPEEVSEVIFGHVLTAGCGQNPTR;VAPEEVSEVIFGHVLTAGCGQNPTR	10090	2	2	2	6.8	41.297	55311000	0	0	1619900	0	0	0	3341100	0	1194900	3096900	0	4738300	0	0	7671900	2050200	7146900	0	0	1271000	0	1431900	0	2086900	1718000	3891600	0	7095600	0	0	2318000	0	0	0	1814400	2823100	0
Q9JIX8	Apoptotic chromatin condensation inducer in the nucleus	Acin1	sp|Q9JIX8|ACINU_MOUSE Apoptotic chromatin condensation inducer in the nucleus OS=Mus musculus OX=10090 GN=Acin1 PE=1 SV=3	Mus musculus	AAPCIYWLPLTESQIVQK;APVVLQPEQIVSEEETPPPLLTK;ETQIVSLPQEENEVK;QFEDEEGEER;SKLPEYSQTAEEEEDQETPSR;TVTQVVPAEGQENGQR;VSDESVLPLAQK;VTDLKAALEQR;WGASTAATQKKPSISITTESLK	10090	9	9	7	11.1	150.72	730820000	18671000	22773000	12354000	29331000	14833000	13258000	29231000	9698500	37656000	3689500	9722200	27498000	8490900	22611000	27794000	24057000	14234000	46861000	17707000	5254500	24719000	21013000	37480000	19812000	39125000	14391000	8977600	7204100	17407000	29567000	11402000	6763400	20286000	20492000	25408000	31049000	10261000
Q91V92	ATP-citrate synthase	Acly	sp|Q91V92|ACLY_MOUSE ATP-citrate synthase OS=Mus musculus OX=10090 GN=Acly PE=1 SV=1	Mus musculus	AGKDLVSSLTSGLLTIGDR;AISEQTGKELLYK;EAYPEEAYIADLDAK;GKLGLVGVNLSLDGVK;GKLGLVGVNLSLDGVKSWLKPR;GVTIIGPATVGGIKPGCFK;IGNTGGMLDNILASK;LGLVGVNLSLDGVK;LGLVGVNLSLDGVKSWLKPR;LLVGVDEKLNTEDIKR;LYRPGSVAYVSR;NQALKEAGVFVPR;RGGPNYQEGLR;SGASLKLTLLNPK;SGGMSNELNNIISR;TASFSESRADEVAPAKK;YICTTSAIQNR	10090	17	17	6	19.2	119.73	1499200000	38812000	22629000	43349000	44165000	39782000	14960000	46351000	40216000	49748000	37384000	82458000	38490000	25863000	25173000	37592000	46591000	36673000	56595000	78634000	38920000	78346000	21057000	35024000	33023000	59444000	43342000	37445000	29575000	18190000	38061000	20506000	76203000	59868000	46925000	22906000	34888000	21397000
Q99KI0	Aconitate hydratase, mitochondrial	Aco2	sp|Q99KI0|ACON_MOUSE Aconitate hydratase, mitochondrial OS=Mus musculus OX=10090 GN=Aco2 PE=1 SV=1	Mus musculus	AKDINQEVYNFLATAGAK;CKSQFTITPGSEQIR;CTTDHISAAGPWLK;DGYAQILR;DSSGQRVDVSPTSQR;DVGGIVLANACGPCIGQWDR;DVGGIVLANACGPCIGQWDRK;EHAALEPR;FKLEAPDADELPR;FNPETDFLTGKDGKK;FRGHLDNISNNLLIGAINIENGKANSVR;GHLDNISNNLLIGAINIENGK;GHLDNISNNLLIGAINIENGKANSVR;IVYGHLDDPANQEIER;KFKLEAPDADELPR;KGEKNTIVTSYNR;LEAPDADELPR;LNRPLTLSEK;LNRPLTLSEKIVYGHLDDPANQEIER;NAVTQEFGPVPDTAR;NFTGRNDANPETHAFVTSPEIVTALAIAGTLK;NTIVTSYNR;QGLLPLTFA…	10090	38	38	18	45.8	85.462	14263000000	580280000	339970000	716060000	451010000	362070000	214450000	434590000	383570000	486590000	379000000	439430000	388810000	350810000	294120000	482340000	488330000	482730000	472950000	424350000	303370000	347610000	226360000	383930000	520180000	336720000	383010000	330580000	333160000	304210000	275250000	216230000	397820000	355840000	440150000	486070000	450630000	98228000
Q8BWN8	Acyl-coenzyme A thioesterase 4	Acot4	sp|Q8BWN8|ACOT4_MOUSE Peroxisomal succinyl-coenzyme A thioesterase OS=Mus musculus OX=10090 GN=Acot4 PE=1 SV=1	Mus musculus	GPILFVAGQDDHCWR;SCWDEPLSIAVR	10090	2	2	1	6.4	46.48	110580000	2777600	1662900	2114100	2934500	1285300	4295000	2769300	3864400	6038100	6674100	3214700	4451800	2575300	2009400	5454100	2546800	4959900	1577200	3300400	3395600	3216700	4077600	1794200	1304900	3474700	5463700	0	1699100	2751400	0	4569300	3301000	1995600	4279000	2374800	2379400	1806700
Q91V12	Cytosolic acyl coenzyme A thioester hydrolase	Acot7	sp|Q91V12|BACH_MOUSE Cytosolic acyl coenzyme A thioester hydrolase OS=Mus musculus OX=10090 GN=Acot7 PE=1 SV=2	Mus musculus	ATLWYVPLSLK;VLEVPPIVYLR;YEAQKLER	10090	3	3	1	7.9	42.536	132760000	7295600	4773700	1652600	4483500	2560800	3431300	5559300	6202900	9089200	4198000	9660300	5878100	1609500	0	5215400	0	2365900	5136300	9326900	4978800	0	0	3284800	6048100	643340	0	4752100	0	513070	0	4273500	146420	2931400	7744900	4251400	4749200	6198800
P33121	Long-chain-fatty-acid--CoA ligase 1	ACSL1	sp|P33121|ACSL1_HUMAN Long-chain-fatty-acid--CoA ligase 1 OS=Homo sapiens OX=9606 GN=ACSL1 PE=1 SV=1	Homo sapiens	GIQVSNNGPCLGSR	9606	1	1	0	2	77.942	5058200	0	0	0	0	0	0	0	0	0	0	0	0	0	0	0	1009400	0	0	0	0	0	501860	0	0	0	0	0	0	1285500	0	1236900	0	0	1024500	0	0	0
Q9CZW4	Long-chain-fatty-acid--CoA ligase 3	Acsl3	sp|Q9CZW4|ACSL3_MOUSE Long-chain-fatty-acid--CoA ligase 3 OS=Mus musculus OX=10090 GN=Acsl3 PE=1 SV=2	Mus musculus	THYQADIER;WLCTGDIGEFDPDGCLK	10090	2	2	1	3.6	80.491	19751000	1071600	0	0	1266700	0	0	713440	0	4660000	0	0	0	0	0	715990	705270	778560	528970	315540	0	0	941320	0	0	648030	696970	0	1053900	1555700	0	0	0	1283800	0	1190000	1625600	908700
Q91WC3	Long-chain-fatty-acid--CoA ligase 6	Acsl6	sp|Q91WC3|ACSL6_MOUSE Long-chain-fatty-acid--CoA ligase 6 OS=Mus musculus OX=10090 GN=Acsl6 PE=1 SV=1	Mus musculus	ALRPTIFPVVPR;LAQGEYVAPEKIENIYIR;RAEFLGSGLLQHDCK;VGFFQGDIR	10090	4	4	2	7.7	78.016	139560000	5856300	1822200	5742700	10403000	5174600	5691400	6976100	4648500	6430400	5500600	6185800	3720300	2940700	1210900	4218800	5712500	10383000	2380200	3398600	808440	0	2938200	2198800	1929500	3485800	4164000	3876200	1032100	2945600	1224000	1133200	1169600	2575100	2648600	6722000	2311600	2269200
Q91VA0	Acyl-coenzyme A synthetase ACSM1, mitochondrial	Acsm1	sp|Q91VA0|ACSM1_MOUSE Acyl-coenzyme A synthetase ACSM1, mitochondrial OS=Mus musculus OX=10090 GN=Acsm1 PE=1 SV=1	Mus musculus	MQWLKSFQICK	10090	1	1	1	1.9	64.76	564680000	0	0	0	10553000	0	0	0	0	15329000	0	21801000	30630000	0	0	0	56482000	37186000	47475000	39053000	44277000	0	9808500	0	0	0	0	0	25012000	13378000	25527000	19268000	34201000	27338000	31480000	30878000	45006000	0
P68133	Actin, alpha skeletal muscle	ACTA1	sp|P68133|ACTS_HUMAN Actin, alpha skeletal muscle OS=Homo sapiens OX=9606 GN=ACTA1 PE=1 SV=1;sp|P68032|ACTC_HUMAN Actin, alpha cardiac muscle 1 OS=Homo sapiens OX=9606 GN=ACTC1 PE=1 SV=1;sp|P63267|ACTH_HUMAN Actin, gamma-enteric smooth muscle OS=Homo sapie	Homo sapiens	AGFAGDDAPR;AVFPSIVGRPR;DSYVGDEAQSK;DSYVGDEAQSKR;EITALAPSTMK;GILTLKYPIEHGIITNWDDMEK;GILTLKYPIEHGIITNWDDMEKIWHHTFYNELR;IWHHTFYNELR;SYELPDGQVITIGNER	9606	9	2	0	24.7	42.051	953010000	98953000	17027000	7047000	2473300	23639000	51196000	16894000	7126400	9099100	0	95948000	11232000	6692100	3838500	84037000	41121000	10967000	44820000	68426000	15113000	102260000	7932000	15225000	70483000	20532000	10214000	2575100	11059000	25160000	7787400	0	10089000	3292000	2812700	19709000	28226000	77516000
P60709	Actin, cytoplasmic 1	ACTB	sp|P60709|ACTB_HUMAN Actin, cytoplasmic 1 OS=Homo sapiens OX=9606 GN=ACTB PE=1 SV=1	Homo sapiens	AGFAGDDAPR;AVFPSIVGRPR;CDVDIRKDLYANTVLSGGTTMYPGIADR;DDDIAALVVDNGSGMCK;DLYANTVLSGGTTMYPGIADR;DSYVGDEAQSK;DSYVGDEAQSKR;EITALAPSTMK;GYSFTTTAER;IWHHTFYNELR;LCYVALDFEQEMATAASSSSLEK;QEYDESGPSIVHR;SYELPDGQVITIGNER;TTGIVMDSGDGVTHTVPIYEGYALPHAILR;VAPEEHPVLLTEAPLNPK;VAPEEHPVLLTEAPLNPKANR	9606	16	16	0	56.8	41.736	76388000000	3372100000	1442100000	2687700000	2638000000	2686700000	980680000	3581500000	886390000	2660100000	2667200000	2231200000	2092000000	1442500000	1203400000	2225900000	2260700000	2359400000	2642700000	3148300000	1841100000	1689300000	1318600000	1905900000	2932500000	2286100000	2040800000	1212400000	2595800000	1665300000	1800300000	2302000000	1604800000	1343800000	1616300000	2787200000	2237400000	852710000
P63260	Actin, cytoplasmic 2	Actg1	sp|P63260|ACTG_MOUSE Actin, cytoplasmic 2 OS=Mus musculus OX=10090 GN=Actg1 PE=1 SV=1	Mus musculus	AGFAGDDAPR;AVFPSIVGRPR;CDVDIRKDLYANTVLSGGTTMYPGIADR;DLYANTVLSGGTTMYPGIADR;DSYVGDEAQSK;DSYVGDEAQSKR;EEEIAALVIDNGSGMCK;EITALAPSTMK;GYSFTTTAER;IWHHTFYNELR;LCYVALDFEQEMATAASSSSLEK;QEYDESGPSIVHR;SYELPDGQVITIGNER;TTGIVMDSGDGVTHTVPIYEGYALPHAILR;VAPEEHPVLLTEAPLNPK;VAPEEHPVLLTEAPLNPKANR	10090	16	1	0	56.8	41.792	485680000	0	8007100	8235600	18322000	10597000	6578100	0	16660000	16233000	7597100	10922000	15851000	9293600	9960300	17253000	21082000	13887000	21726000	31814000	13034000	13925000	10221000	16685000	20664000	14094000	13541000	18624000	0	9111900	10600000	17839000	14869000	10012000	15455000	19505000	23480000	0
Q9Z2N8	Actin-like protein 6A	Actl6a	sp|Q9Z2N8|ACL6A_MOUSE Actin-like protein 6A OS=Mus musculus OX=10090 GN=Actl6a PE=1 SV=2	Mus musculus	AGYAGEDCPKVDFPTAIGVVLER;QGGPTYYIDTNALR;QGGPTYYIDTNALRVPR;VDFPTAIGVVLER	10090	4	4	2	9.3	47.447	126290000	7541700	3445700	0	1997100	1624600	4891600	4034000	3446000	7517100	1136200	3909800	5968800	825840	2371400	2707500	2152500	8038500	3007900	6035100	6270500	6267200	2983200	1344000	0	6787500	4685100	2057900	4964800	2984600	1112900	3813900	1301300	4991900	0	4701300	1375300	2979200
O43707	Alpha-actinin-4	ACTN4	sp|O43707|ACTN4_HUMAN Alpha-actinin-4 OS=Homo sapiens OX=9606 GN=ACTN4 PE=1 SV=2	Homo sapiens	CQLEINFNTLQTK;DLLLDPAWEK;DYETATLSDIK;DYETATLSDIKALIR;ETTDTDTADQVIASFK;IAESNHIKLSGSNPYTTVTPQIINSK;LASDLLEWIR;LASDLLEWIRR;LSGSNPYTTVTPQIINSK;TINEVENQILTR;VEQIAAIAQELNELDYYDSHNVNTR;VGWEQLLTTIAR;VLAGDKNFITAEELR	9606	13	13	0	17	104.85	856060000	37072000	26793000	12868000	29412000	18595000	37502000	25075000	18036000	28416000	15420000	19410000	18960000	12689000	20990000	30362000	37989000	19673000	28782000	31193000	20999000	7465500	11421000	25930000	18748000	27677000	33034000	26578000	14615000	15848000	11611000	8968600	23564000	48561000	17196000	40224000	34377000	8368000
P61163	Alpha-centractin	ACTR1A	sp|P61163|ACTZ_HUMAN Alpha-centractin OS=Homo sapiens OX=9606 GN=ACTR1A PE=1 SV=1	Homo sapiens	AGFAGDQIPK;AQYYLPDGSTIEIGPSR;IWQYVYSKDQLQTFSEEHPVLLTEAPLNPR;LYSTWIGGSILASLDTFKK;TLFSNIVLSGGSTLFK	9606	5	5	0	24.5	42.613	714070000	38787000	15449000	8617600	14482000	16016000	10816000	19540000	30247000	12933000	14942000	14069000	27041000	24585000	18071000	34289000	19926000	14166000	19143000	41848000	26153000	24833000	13482000	17187000	31949000	35135000	19623000	16211000	7902900	19619000	8877400	15891000	12673000	7098600	15257000	40120000	7089000	21099000
P61160	Actin-related protein 2	ACTR2	sp|P61160|ARP2_HUMAN Actin-related protein 2 OS=Homo sapiens OX=9606 GN=ACTR2 PE=1 SV=1	Homo sapiens	CGYAGSNFPEHIFPALVGRPIIR;KVVVCDNGTGFVK;VVVCDNGTGFVK	9606	3	3	0	9.1	44.76	455270000	10641000	8092500	4102300	31935000	7466700	8246400	16206000	17077000	17402000	28055000	28167000	5149200	4613500	8979500	9570700	8329900	21190000	23394000	12246000	4356000	11206000	6378300	10534000	8428700	20640000	10514000	7979000	28854000	9516300	16325000	7963900	13522000	2097900	5953100	13819000	6316200	8812800
P61158	Actin-related protein 3	ACTR3	sp|P61158|ARP3_HUMAN Actin-related protein 3 OS=Homo sapiens OX=9606 GN=ACTR3 PE=1 SV=3	Homo sapiens	AGRLPACVVDCGTGYTK;DYEEIGPSICR;LGYAGNTEPQFIIPSCIAIK;LGYAGNTEPQFIIPSCIAIKESAK;LKLSEELSGGR;YSYVCPDLVK	9606	6	6	0	17.5	47.371	1103800000	55880000	21343000	22531000	30341000	26442000	18776000	32810000	32391000	29483000	22805000	17371000	28677000	22858000	18074000	30740000	44983000	34382000	25099000	34818000	32953000	41913000	24496000	27131000	20980000	56113000	35286000	52082000	19997000	17159000	20778000	28825000	39948000	27791000	49936000	29082000	29560000	24901000
P56376	Acylphosphatase-1	Acyp1	sp|P56376|ACYP1_MOUSE Acylphosphatase-1 OS=Mus musculus OX=10090 GN=Acyp1 PE=1 SV=2	Mus musculus	ANFNNEKVIANLDYSDFQIVK;VIANLDYSDFQIVK	10090	2	2	2	21.2	11.241	130360000	0	0	0	1381500	0	1366300	23217000	11283000	0	10891000	0	4056600	6531800	0	0	15568000	18024000	0	0	0	975790	0	0	0	0	0	18312000	9075800	0	0	0	0	0	0	7946900	1730800	0
Q9QYC0	Alpha-adducin	Add1	sp|Q9QYC0|ADDA_MOUSE Alpha-adducin OS=Mus musculus OX=10090 GN=Add1 PE=1 SV=2	Mus musculus	AIIEKEYQPHVIVSTTGPNPFNTLTDR;EYQPHVIVSTTGPNPFNTLTDR;GSEENLDETR;GSTNLGVNQAGFTLHSAVYAARPDAK;KQKGSEENLDETR;QKGSEENLDETR;SLVQGELVTASK;TSTSAVPNLFVPLNTNPK;VDENNPEYLR;VNLQGDIVDR;WLHSGRGDDASEEGQNGSSPK;YFDRVDENNPEYLR;YSDVEVPASVTGHSFASDGDSGTCSPLR	10090	13	13	9	23	80.646	1066700000	33381000	15799000	43896000	37222000	37895000	35815000	60814000	38822000	25109000	47520000	38751000	33285000	23504000	17244000	34537000	35126000	42368000	17574000	29827000	26317000	17451000	17485000	31049000	27191000	17207000	32468000	20419000	35531000	32256000	12646000	19172000	19323000	24541000	11327000	59447000	14402000	15502000
Q9QYB8	Beta-adducin	Add2	sp|Q9QYB8|ADDB_MOUSE Beta-adducin OS=Mus musculus OX=10090 GN=Add2 PE=1 SV=4	Mus musculus	FSEDDPEYLR;QDIKSAGPQSQLLASVIAEK;SAGPQSQLLASVIAEK	10090	3	3	2	4.1	80.641	179510000	5595000	4503600	8045700	6148000	4428400	6239000	7188900	8893800	7322800	5833500	4686300	3900700	4224300	2716300	4345300	5027400	5750700	6004800	2946000	2441400	4086500	4404300	5054700	4731000	1939200	10499000	4382700	4279400	1436500	3556400	2034100	2026500	5731000	8555300	4233200	6313800	3724300
Q9QYB5	Gamma-adducin	Add3	sp|Q9QYB5|ADDG_MOUSE Gamma-adducin OS=Mus musculus OX=10090 GN=Add3 PE=1 SV=2	Mus musculus	HKSDVEIPATVTAFSFEDDSAPLSPLK;INESDPEYLR;YFDRINESDPEYLR	10090	3	3	3	5.8	78.776	304970000	10191000	6306300	2259000	11310000	5084500	6625200	12624000	24108000	15030000	8496400	17007000	11755000	4900300	15423000	6339000	9144600	6760800	3047900	14401000	6630000	20833000	3928200	12835000	7583300	5971900	2365800	1748700	7678200	10513000	6159000	2923000	1831000	10043000	2434900	2048400	8632900	8182700
P28474	Alcohol dehydrogenase class-3	Adh5	sp|P28474|ADHX_MOUSE Alcohol dehydrogenase class-3 OS=Mus musculus OX=10090 GN=Adh5 PE=1 SV=3	Mus musculus	AAVAWEAGKPLSIEEIEVAPPKAHEVR;AGDTVIPLYIPQCGECK;AGDTVIPLYIPQCGECKFCLNPK;AKEFGASECISPQDFSK;EFGASECISPQDFSK;IIGIDINKDKFAK;LKAGDTVIPLYIPQCGECKFCLNPK	10090	7	7	3	21.9	39.547	676960000	32323000	5967300	13952000	16581000	19859000	12143000	22436000	34823000	26234000	23298000	13355000	48342000	8678400	11990000	20159000	14407000	27355000	23005000	28294000	13091000	17755000	9742500	12214000	17224000	25593000	17232000	4930800	5100100	8133400	7751000	16074000	25096000	13279000	23707000	32219000	24623000	16746000
P55264	Adenosine kinase	Adk	sp|P55264|ADK_MOUSE Adenosine kinase OS=Mus musculus OX=10090 GN=Adk PE=1 SV=2	Mus musculus	AAADEPKPK;SLVANLAAANCYKK	10090	2	2	2	6.4	40.148	88693000	2787800	1019900	3032200	6186500	0	0	6270000	2371100	1268500	0	1148800	0	0	744890	0	0	0	13646000	2260500	1598100	2446600	0	0	1010100	1607700	1676900	1532100	1965700	3950000	1706900	0	1785100	1375300	4450400	9581900	13270000	2239800
P54923	[Protein ADP-ribosylarginine] hydrolase	Adprh	sp|P54923|ADPRH_MOUSE [Protein ADP-ribosylarginine] hydrolase OS=Mus musculus OX=10090 GN=Adprh PE=1 SV=1	Mus musculus	ALYSLGSKEDPVLDP	10090	1	1	1	4.1	40.068	48256000	2943700	0	2475900	0	0	1782200	0	0	0	1984400	2591400	2418100	0	0	0	0	4768000	3584100	2719300	0	1651000	0	2820700	3738800	0	2031700	0	2809100	0	0	0	1858000	5150100	0	0	2929500	2921300
P54822	Adenylosuccinate lyase	Adsl	sp|P54822|PUR8_MOUSE Adenylosuccinate lyase OS=Mus musculus OX=10090 GN=Adsl PE=1 SV=2	Mus musculus	AASGDPGSAESYRSPLAAR;QEGGDNDLIER;VLSQQAAAVVK	10090	3	3	2	8.5	54.866	215690000	6971200	8511900	6177200	8860400	5595100	4003600	5765300	5628200	7296900	6325800	1796200	5565500	1701100	3665000	6811600	6935200	9307900	4524400	6254100	4103000	8112700	1289000	11328000	11230000	1483600	6204700	2955800	6076100	8050400	8456900	6584000	5989100	3846200	5632200	6996100	5658100	5579000
P28650	Adenylosuccinate synthetase isozyme 1	Adssl1	sp|P28650|PURA1_MOUSE Adenylosuccinate synthetase isozyme 1 OS=Mus musculus OX=10090 GN=Adss1 PE=1 SV=2	Mus musculus	ICDLLSDFDEFSAR;VVDLLATDADIVSR	10090	2	2	2	6.1	50.254	22603000	536330	0	0	0	0	0	0	616850	709630	1055600	1187900	0	2050300	483690	1490100	2247500	0	326650	0	0	0	1375400	0	2218300	3580700	1440600	1491400	956360	0	0	0	835380	0	0	0	0	713830
Q9D517	1-acyl-sn-glycerol-3-phosphate acyltransferase gamma	Agpat3	sp|Q9D517|PLCC_MOUSE 1-acyl-sn-glycerol-3-phosphate acyltransferase gamma OS=Mus musculus OX=10090 GN=Agpat3 PE=1 SV=2	Mus musculus	GSSYGNQELK;RFPLEDIPADETSAAQWLHK;RFPLEDIPADETSAAQWLHKLYQEK	10090	3	3	3	9.3	43.295	426100000	25108000	16952000	13888000	13411000	8390200	1405800	4816600	7907000	8407100	6961400	0	7474100	15601000	10565000	13691000	12981000	34746000	11604000	14134000	10480000	8510100	10607000	19154000	11658000	2204100	7673900	16283000	9472100	3526200	19858000	14523000	17389000	8395300	7174400	15105000	16037000	14093000
P23526	Adenosylhomocysteinase	AHCY	sp|P23526|SAHH_HUMAN Adenosylhomocysteinase OS=Homo sapiens OX=9606 GN=AHCY PE=1 SV=4	Homo sapiens	GISEETTTGVHNLYK;KLDEAVAEAHLGKLNVK;SDKLPYKVADIGLAAWGR;SKFDNLYGCR;VADIGLAAWGR;VPAINVNDSVTK	9606	6	6	0	16.7	47.716	2169700000	88904000	52995000	37511000	78132000	83448000	40697000	59762000	63084000	72513000	50831000	37200000	37679000	28890000	54748000	46453000	86213000	108530000	36596000	51694000	80853000	60777000	23836000	36119000	51138000	35521000	38731000	49613000	66808000	45701000	73519000	89263000	26108000	117050000	67986000	78075000	112760000	34930000
Q68FL4	Putative adenosylhomocysteinase 3	Ahcyl2	sp|Q68FL4|SAHH3_MOUSE Putative adenosylhomocysteinase 3 OS=Mus musculus OX=10090 GN=Ahcyl2 PE=1 SV=1;sp|Q80SW1|SAHH2_MOUSE S-adenosylhomocysteine hydrolase-like protein 1 OS=Mus musculus OX=10090 GN=Ahcyl1 PE=1 SV=1	Mus musculus	SVQVVSAAAAAKVPEVELK;TPELTWER;YKQDVYLLPK	10090	3	3	0	6	66.899	406040000	13247000	12901000	7454600	9938300	8928800	6886100	10063000	7593600	7388800	12039000	6518700	6622500	9507100	8398900	12081000	9270100	21349000	11262000	15918000	15084000	5753800	9115100	19857000	9501700	15796000	12874000	12288000	5430600	17652000	6592300	10032000	4892400	19598000	13850000	16015000	14338000	10381000
Q8R010	Aminoacyl tRNA synthase complex-interacting multifunctional protein 2	Aimp2	sp|Q8R010|AIMP2_MOUSE Aminoacyl tRNA synthase complex-interacting multifunctional protein 2 OS=Mus musculus OX=10090 GN=Aimp2 PE=1 SV=2	Mus musculus	SCENLAPFSTALQLLK;TTSPATDAGHVQETSEPSLQALESR	10090	2	2	2	12.8	35.377	59200000	1990200	1490200	0	3572500	793960	1363700	2630100	2269800	1317800	1215500	1393800	1060900	1346100	1099100	937220	0	914490	1227000	1829700	1546300	5156200	2817500	0	3682600	1586900	985610	1628200	0	1712800	0	0	1042500	2783300	5117000	3334600	1354700	2319700
O08915	AH receptor-interacting protein	Aip	sp|O08915|AIP_MOUSE AH receptor-interacting protein OS=Mus musculus OX=10090 GN=Aip PE=1 SV=1	Mus musculus	TLHSDNEGSVIDDSR;VLELDPALAPVVSR	10090	2	2	1	8.8	37.605	106360000	5742200	0	0	0	0	0	11880000	0	5121300	4591900	2757300	0	0	3978500	0	6575800	5768800	6028900	5749400	0	0	0	0	8301700	0	4916000	6005400	3156400	0	2770100	3471500	4680100	0	3078600	6801400	4980200	5615800
Q924K1	Aryl-hydrocarbon-interacting protein-like 1	Aipl1	sp|Q924K1|AIPL1_MOUSE Aryl-hydrocarbon-interacting protein-like 1 OS=Mus musculus OX=10090 GN=Aipl1 PE=2 SV=2	Mus musculus	ETWNLNNEER	10090	1	1	1	3	38.212	83874000	3524800	1491800	2276700	7874100	2342900	2969100	5869400	1424300	0	0	2833100	5469700	3662900	2178500	2417800	3141200	2872700	1941400	4629700	1046100	5344300	2066300	0	0	0	1309100	0	2944300	3132100	2438300	2405100	0	2243300	2220600	0	1803900	3678800
Q9R0Y5	Adenylate kinase isoenzyme 1	Ak1	sp|Q9R0Y5|KAD1_MOUSE Adenylate kinase isoenzyme 1 OS=Mus musculus OX=10090 GN=Ak1 PE=1 SV=1	Mus musculus	EVKQGEEFEQK;IIFVVGGPGSGKGTQCEK;IVQKYGYTHLSTGDLLR;LETYYNATEPVISFYDKR;QGEEFEQK;RLETYYNATEPVISFYDKR;VDSSNGFLIDGYPR;YGYTHLSTGDLLR	10090	8	8	5	40.7	21.539	1672600000	60820000	49992000	50623000	38487000	44666000	38963000	86689000	49600000	49498000	30938000	32285000	49970000	18177000	38718000	44206000	31717000	37066000	38958000	90094000	55894000	39545000	37950000	63987000	18511000	33902000	59698000	50583000	34466000	24489000	46913000	87646000	61411000	52954000	62900000	38056000	22245000	16624000
Q9WUR9	Adenylate kinase 4, mitochondrial	Ak4	sp|Q9WUR9|KAD4_MOUSE Adenylate kinase 4, mitochondrial OS=Mus musculus OX=10090 GN=Ak4 PE=1 SV=1	Mus musculus	GLLVPDHVITR;VYNLDFNPPQVQGIDDITGEPLVQQEDDKPEAVAAR	10090	2	2	2	21.1	25.061	271270000	3714500	10993000	1514900	5329400	671610	6020600	0	10640000	4462900	1677200	2533100	7766900	991280	6096000	21402000	3513000	12343000	5232200	4513300	14859000	1916800	3711600	3049400	6277900	7085000	26178000	0	1503400	6873500	4482700	3809500	12931000	45146000	6858400	6928900	10249000	3536400
Q9JII6	Alcohol dehydrogenase [NADP(+)]	Akr1a1	sp|Q9JII6|AK1A1_MOUSE Aldo-keto reductase family 1 member A1 OS=Mus musculus OX=10090 GN=Akr1a1 PE=1 SV=3	Mus musculus	AWRHPDEPVLLEEPVVLALAEK;DAGHPLYPFNDPY;GLEVTAYSPLGSSDR;MPLIGLGTWK;TASSVLLHTGQK	10090	5	5	2	22.2	36.586	856730000	21340000	20399000	24996000	28585000	20860000	13577000	18768000	29136000	18388000	15276000	17588000	19543000	21879000	23094000	20616000	22040000	20697000	40219000	28288000	8707900	27626000	16869000	24404000	20517000	22170000	36820000	19846000	23150000	17251000	17155000	32629000	30408000	22624000	50114000	21532000	39614000	11063000
P45376	Aldose reductase	Akr1b1	sp|P45376|ALDR_MOUSE Aldo-keto reductase family 1 member B1 OS=Mus musculus OX=10090 GN=Akr1b1 PE=1 SV=3	Mus musculus	ASHLELNNGTK;TIGVSNFNPLQIER	10090	2	2	2	7.9	35.732	340280000	8151200	7101800	6424900	9235900	9871400	5331800	8811400	10138000	5583600	21200000	14948000	7089200	0	9148900	14967000	0	2718000	7352600	20963000	21503000	7199500	7221900	10964000	4870500	4064900	8342200	6844000	9638100	10131000	9680900	11472000	14274000	5855500	18696000	9614700	10873000	5180200
Q9DCT1	1,5-anhydro-D-fructose reductase	Akr1e2	sp|Q9DCT1|AKCL2_MOUSE 1,5-anhydro-D-fructose reductase OS=Mus musculus OX=10090 GN=Akr1e2 PE=1 SV=1	Mus musculus	LATFPTTENHQDYPFHIEY;LLDKPGLR	10090	2	2	2	9	34.46	336830000	11186000	8067100	7203600	3588000	10995000	10805000	10613000	3214300	23718000	16575000	4884100	4441500	17821000	7086600	6737000	2886100	0	12266000	11687000	22665000	9620600	14686000	9732400	18027000	9342300	1513800	5595000	2687900	10623000	1673500	5603000	4523000	8095100	9545300	5846700	23273000	7455400
Q8CG76	Aflatoxin B1 aldehyde reductase member 2	Akr7a2	sp|Q8CG76|ARK72_MOUSE Aflatoxin B1 aldehyde reductase member 2 OS=Mus musculus OX=10090 GN=Akr7a2 PE=1 SV=3	Mus musculus	FYAYNPLAGGLLTGK;VDLFYLHAPDHSTPVEETLR	10090	2	2	1	9.5	40.612	41140000	0	0	0	0	0	4851500	771270	919710	10234000	0	0	0	0	1119200	5693900	759730	3323100	738420	1532800	0	0	0	0	0	4982900	0	0	0	753730	0	0	695390	1820100	0	943290	2000800	0
P07724	Serum albumin	Alb	sp|P07724|ALBU_MOUSE Albumin OS=Mus musculus OX=10090 GN=Alb PE=1 SV=3	Mus musculus	AADKDTCFSTEGPNLVTR;AETFTFHSDICTLPEKEK;APQVSTPTLVEAAR;CCSGSLVER;CCTLPEDQRLPCVEDYLSAILNR;ENYGELADCCTK;KQTALAELVK;LGEYGFQNAILVR;LQTCCDKPLLK;LSQTFPNADFAEITK;LVQEVTDFAK;RHPDYSVSLLLR;RPCFSALTVDETYVPK;RPCFSALTVDETYVPKEFK;SLHTLFGDKLCAIPNLR;SLHTLFGDKLCAIPNLRENYGELADCCTK;TCVADESAANCDK;TNCDLYEK;VNKECCHGDLLECADDR;VNKECCHGDLLECADDRAELAK;YTQKAPQVSTPTLVEAAR	10090	21	21	21	40.8	68.692	4060500000	195650000	89548000	194760000	178810000	74879000	77936000	156310000	81624000	136580000	137890000	63796000	142490000	99585000	75576000	144940000	102400000	163410000	114490000	201630000	126080000	79231000	61247000	89493000	74692000	78958000	142830000	44369000	92115000	124710000	55940000	88721000	116990000	91452000	81237000	94287000	185880000	36546000
P24549	Retinal dehydrogenase 1	Aldh1a1	sp|P24549|AL1A1_MOUSE Retinal dehydrogenase 1 OS=Mus musculus OX=10090 GN=Aldh1a1 PE=1 SV=5	Mus musculus	ANNTTYGLAAGLFTK;FKSVDDVIK;FKSVDDVIKR;IFINNEWHNSVSGK;IFVEESVYDEFVKR;IGPALSCGNTVVVKPAEQTPLTALHLASLIK;ILDLIESGKK;QAFQIGSPWR;SSPAQPAVPAPLADLKIQHTK;VAFTGSTQVGK;VFANAYLSDLGGCIK	10090	11	11	9	30.1	54.467	1001300000	31428000	15996000	55256000	24928000	29745000	18546000	43041000	17570000	23002000	22537000	27045000	38501000	23553000	24346000	28773000	18082000	18836000	27627000	25674000	32084000	22649000	11758000	23945000	28633000	26919000	26381000	22114000	23234000	23760000	22895000	22557000	72533000	37432000	25105000	25338000	39497000	14989000
Q8R0Y6	Cytosolic 10-formyltetrahydrofolate dehydrogenase	Aldh1l1	sp|Q8R0Y6|AL1L1_MOUSE Cytosolic 10-formyltetrahydrofolate dehydrogenase OS=Mus musculus OX=10090 GN=Aldh1l1 PE=1 SV=1	Mus musculus	RPQPEEGATYEGIQKK	10090	1	1	1	1.8	98.708	42144000	7409600	0	0	0	1135600	0	1594800	2848100	0	0	634920	0	0	0	0	4144700	0	2394200	5241000	3067000	3121700	0	0	1069900	0	1526300	0	1375700	0	1694200	1834100	0	1559700	0	222330	1270400	9821500
P47738	Aldehyde dehydrogenase, mitochondrial	Aldh2	sp|P47738|ALDH2_MOUSE Aldehyde dehydrogenase, mitochondrial OS=Mus musculus OX=10090 GN=Aldh2 PE=1 SV=1	Mus musculus	LLCGGGAAADR;TEQGPQVDETQFK;VAEQTPLTALYVANLIK	10090	3	3	1	7.9	56.537	32312000	569660	0	941550	0	2320400	2205800	723430	1036600	0	607980	1755200	0	456870	432890	730560	1862400	274930	2322100	983290	2047400	0	1566800	0	2198100	0	0	791880	1016600	665160	550380	3478200	2066200	0	0	707110	0	802690
P47740	Fatty aldehyde dehydrogenase	Aldh3a2	sp|P47740|AL3A2_MOUSE Aldehyde dehydrogenase family 3 member A2 OS=Mus musculus OX=10090 GN=Aldh3a2 PE=1 SV=2	Mus musculus	NVDEAINFINDR;YLAPTILTDVDPNSK	10090	2	2	2	5.6	53.97	58781000	1227500	0	0	2373000	1534400	0	2663900	3557500	0	6243100	3601700	5075700	1170200	1302000	3068900	0	1661500	1760300	2200700	1221000	0	1332300	2458200	2454300	0	2712400	0	0	1287500	1549400	0	1568200	2645700	0	4111600	0	1895100
Q8BWF0	Succinate-semialdehyde dehydrogenase, mitochondrial	Aldh5a1	sp|Q8BWF0|SSDH_MOUSE Succinate-semialdehyde dehydrogenase, mitochondrial OS=Mus musculus OX=10090 GN=Aldh5a1 PE=1 SV=1	Mus musculus	AAYDAFNSWKGVSVK;AVEKVEKQVNDAVAK;EVGEVLCTDPLVSK;HQSGGNFFEPTLLSNVTR;ISFTGSTATGK;LGTVADCGVPEAR;SLRVGNGFEEGTTQGPLINEK;VGNGFEEGTTQGPLINEK;WLPAPATFPVYDPASGAK	10090	9	9	8	23.9	55.968	1875700000	59882000	71816000	34432000	81092000	75206000	32876000	45499000	51981000	41990000	34082000	52072000	70528000	45032000	44308000	38941000	83227000	41216000	34367000	42021000	27932000	72460000	37894000	49107000	46092000	50711000	65330000	52338000	61426000	41181000	44489000	56037000	46786000	64949000	76236000	63975000	38175000	19189000
Q9EQ20	Methylmalonate-semialdehyde dehydrogenase [acylating], mitochondrial	Aldh6a1	sp|Q9EQ20|MMSA_MOUSE Methylmalonate-semialdehyde dehydrogenase [acylating], mitochondrial OS=Mus musculus OX=10090 GN=Aldh6a1 PE=1 SV=1	Mus musculus	AISFVGSNQAGEYIFER;VNAGDQPGADLGPLITPQAK	10090	2	2	1	6.9	57.915	220090000	9651000	14355000	6034800	9338800	5880600	4049700	7240700	6242200	7291800	3645600	7944900	5814500	2986500	5883900	7677300	8557700	9138600	4400900	3769500	2823200	3430500	1508100	3135800	5380000	2289200	7083700	3308600	0	5393500	10492000	5196900	9542200	7483700	9473100	7338700	6302600	6328800
Q9DBF1	Alpha-aminoadipic semialdehyde dehydrogenase	Aldh7a1	sp|Q9DBF1|AL7A1_MOUSE Alpha-aminoadipic semialdehyde dehydrogenase OS=Mus musculus OX=10090 GN=Aldh7a1 PE=1 SV=4	Mus musculus	EDNEGVYNGSWGGR;GEVITTYCPANNEPIAR;GSDCGIVNVNIPTSGAEIGGAFGGEK;STCTINYSTSLPLAQGIKFQ;VGNPWDPNILYGPLHTK	10090	5	5	3	17.4	58.861	613420000	17108000	9477200	27988000	26327000	17997000	19134000	34006000	18857000	9453000	23498000	19480000	10038000	13432000	11651000	18865000	10013000	33764000	4905800	14535000	14930000	12336000	14235000	13435000	21683000	16971000	25618000	18191000	19654000	13926000	12264000	4629600	5314500	9338000	42687000	13413000	14263000	9033200
Q9JLJ2	4-trimethylaminobutyraldehyde dehydrogenase	Aldh9a1	sp|Q9JLJ2|AL9A1_MOUSE 4-trimethylaminobutyraldehyde dehydrogenase OS=Mus musculus OX=10090 GN=Aldh9a1 PE=1 SV=1	Mus musculus	ANDTTFGLAAGVFTR;LGDPLLEDTR;STGTFVVSQPLNYR;STGTFVVSQPLNYRGGAR	10090	4	4	1	8.7	53.514	292540000	10520000	7258600	3782600	12233000	9159400	2652300	8273900	8632500	10618000	9936600	8738800	7121100	6289900	3693300	10663000	8735600	19274000	6862800	5965900	4665000	9072800	3191800	9425700	9596800	10548000	8927100	8934900	4896900	10826000	3933000	5032400	11034000	5405400	6530200	13062000	7042900	4647800
P05064	Fructose-bisphosphate aldolase A	Aldoa	sp|P05064|ALDOA_MOUSE Fructose-bisphosphate aldolase A OS=Mus musculus OX=10090 GN=Aldoa PE=1 SV=2	Mus musculus	AAQEEYIKR;ADDGRPFPQVIK;ALANSLACQGK;ALANSLACQGKYTPSGQSGAAASESLFISNHAY;ALQASALKAWGGK;ALQASALKAWGGKK;AWGGKKENLK;CAQYKKDGADFAK;CPLLKPWALTFSYGR;CQYVTEK;CQYVTEKVLAAVYK;CVLKIGEHTPSALAIMENANVLAR;DGADFAKWR;ELSDIAHR;ELSDIAHRIVAPGK;ELSDIAHRIVAPGKGILAADESTGSIAK;ENLKAAQEEYIK;ENLKAAQEEYIKR;FSNEEIAMATVTALR;FSNEEIAMATVTALRR;GGVVGIKVDK;GGVVGIKVDKGVVPLAGTNGETTTQGLDGLSER;GILAADESTGSIAK;GILAADESTGSIAKR;GVVPLAGTNGETT…	10090	44	44	12	90.7	39.355	135970000000	6679000000	3380900000	5095800000	3564600000	2612700000	2246900000	3024700000	3333200000	4960300000	4418200000	2949900000	3601900000	1916800000	3440100000	5907800000	3041000000	3010500000	2395300000	7087900000	5146000000	3938300000	2710800000	5222300000	4134300000	2828700000	3247300000	2625000000	3039200000	3757700000	2486700000	2442500000	4437800000	2578800000	6627000000	4201900000	3875000000	1158200000
P05063	Fructose-bisphosphate aldolase C	Aldoc	sp|P05063|ALDOC_MOUSE Fructose-bisphosphate aldolase C OS=Mus musculus OX=10090 GN=Aldoc PE=1 SV=4	Mus musculus	AEMNGLAAQGR;ALQASALNAWR;ALQASALNAWRGQR;CAQYKKDGADFAK;CPLPRPWALTFSYGR;CQYVTEK;CQYVTEKVLAAVYK;DGADFAKWR;DNAGAATEEFIK;DNAGAATEEFIKR;ELSDIALR;GVVPLAGTDGETTTQGLDGLLER;ISDRTPSALAILENANVLAR;KELSDIALR;LSQIGVENTEENR;LSQIGVENTEENRR;PHSYPALSAEQK;PHSYPALSAEQKK;PHSYPALSAEQKKELSDIALR;RLSQIGVENTEENRR;TPSALAILENANVLAR;TVPPAVPGVTFLSGGQSEEEASLNLNAINR;YASICQQNGIVPIVEPEILPDGDHDLK;YASICQQNGIVPIVEPEILPDGDHDLKR;YEGSGDG…	10090	25	19	5	66.1	39.394	13780000000	415520000	301200000	388200000	324640000	469300000	223420000	447800000	359300000	239050000	367770000	405040000	283730000	238190000	195650000	270680000	448820000	323760000	394810000	580390000	582360000	423160000	230750000	814630000	593650000	479100000	354530000	390570000	279230000	268730000	345640000	202900000	429230000	424490000	454530000	360520000	468740000	120560000
O08583	THO complex subunit 4	Alyref	sp|O08583|THOC4_MOUSE THO complex subunit 4 OS=Mus musculus OX=10090 GN=Alyref PE=1 SV=3	Mus musculus	NSKQQLSAEELDAQLDAYNAR;QLPDKWQHDLFDSGFGGGAGVETGGK;QQLSAEELDAQLDAYNAR;SLGTADVHFER	10090	4	4	0	22.7	26.94	1214100000	80691000	30737000	31419000	35180000	15990000	21688000	25198000	32514000	41493000	21645000	16790000	51454000	33262000	27963000	75740000	26863000	21792000	23054000	32300000	46269000	56737000	12936000	47210000	37613000	42616000	20581000	19931000	24127000	31143000	17236000	18266000	24218000	45939000	38616000	48606000	36312000	22812000
Q01433	AMP deaminase 2	AMPD2	sp|Q01433|AMPD2_HUMAN AMP deaminase 2 OS=Homo sapiens OX=9606 GN=AMPD2 PE=1 SV=2	Homo sapiens	SAPYEFPEESPIEQLEER	9606	1	1	0	2	100.69	72548000	5259700	2213100	0	1826700	1732500	1394300	1718000	0	6291500	1856100	4484900	3690100	0	0	2395500	3156500	3408500	4325500	4637200	3415900	1213100	0	2174100	0	0	1207600	1210500	1667200	1767300	1515300	1834400	886050	2891300	0	2257300	2117300	5370300
Q7TQF7	Amphiphysin	Amph	sp|Q7TQF7|AMPH_MOUSE Amphiphysin OS=Mus musculus OX=10090 GN=Amph PE=1 SV=1	Mus musculus	AALPAGEGGSPEGAK;ADETKDEQFEEYVQNFKR;ADIKTGIFAK;AFSIQGAPSDSGPLR;DEQFEEYVQNFKR;EAAEDVAAQGSAGEK;EEAVIPPATDTGETVETAVPTEGAPVEEAEAEK;KGPPVPPLPK;KLVDYDSAR;LGDQHADKAFSIQGAPSDSGPLR;LVDGSLLTLDTYLGQFPDIKNR	10090	11	11	5	22.6	75.012	1956400000	63966000	62168000	58249000	66876000	57819000	25735000	62955000	55537000	39518000	50680000	82162000	39285000	30618000	65463000	37569000	59730000	22445000	59741000	45067000	36645000	81388000	63529000	74496000	74709000	66034000	44747000	31637000	60165000	57265000	45240000	42927000	42732000	54524000	64452000	66539000	63742000	18460000
Q8C8R3	Ankyrin-2	Ank2	sp|Q8C8R3|ANK2_MOUSE Ankyrin-2 OS=Mus musculus OX=10090 GN=Ank2 PE=1 SV=2	Mus musculus	AGEEEPGEPFEIVER;AGNLDKVVEYLK;AGNLDKVVEYLKGGIDINTCNQNGLNALHLAAK;ATFSPIVTLEPR;DFPQYFAVVSR;EGHVGLVQELLGR;ERAEGFESESEDGATKPK;GADSGLLTEPVIR;GGIDINTCNQNGLNALHLAAK;GLVHQAICNLNITLPIYAK;GSPIVQEPEEASEPK;ILGNKATFSPIVTLEPR;SGHDQVVELLLER;SGLTSLHLAAQEDKVNVADILTK;SRDVEVLEGKPIYVDCFGNLVPLTK;SVIEIPTAPVDNVPSAESKPQIPIR;SYIETETESR;TEWQPSPTDIPLQK;TRDGLTPLHCAAR	10090	19	19	8	7.1	426.26	1098400000	52322000	27299000	41285000	22619000	20200000	33317000	28979000	33395000	50883000	41409000	30960000	34642000	24686000	10465000	36952000	30348000	40827000	16703000	47214000	32187000	19404000	14066000	29704000	27543000	26606000	26545000	33611000	14279000	19525000	13582000	30404000	37522000	32666000	53919000	23807000	38483000	13922000
G5E8K5	Ankyrin-3	Ank3	sp|G5E8K5|ANK3_MOUSE Ankyrin-3 OS=Mus musculus OX=10090 GN=Ank3 PE=1 SV=1	Mus musculus	DFPQYFAVVSR;LNLQEEEGSTR;TEEPVSPLTAYQK	10090	3	2	2	1.8	214.06	9636100	664120	0	0	0	826990	150920	0	0	0	0	0	0	0	0	594600	1347800	1501700	776180	0	0	537200	314600	0	0	0	373070	1290500	0	0	0	0	0	0	964970	0	293420	803740
Q9UPS8	Ankyrin repeat domain-containing protein 26	ANKRD26	sp|Q9UPS8|ANR26_HUMAN Ankyrin repeat domain-containing protein 26 OS=Homo sapiens OX=9606 GN=ANKRD26 PE=1 SV=4	Homo sapiens	KNLEATYGTVRTGNR	9606	1	1	1	0.9	196.41	199400000	8637400	4296600	5592100	0	7466600	777750	6119500	0	1258300	1424500	11413000	830120	1676700	3387100	18101000	0	1184500	18432000	4842700	10670000	13169000	1822400	4273000	4666000	0	7803800	2846800	1583900	6327700	7038300	3211400	5339000	1347500	2112800	23451000	8292600	9506000
O35381	Acidic leucine-rich nuclear phosphoprotein 32 family member A	Anp32a	sp|O35381|AN32A_MOUSE Acidic leucine-rich nuclear phosphoprotein 32 family member A OS=Mus musculus OX=10090 GN=Anp32a PE=1 SV=1	Mus musculus	DLSTIEPLKK;DLSTIEPLKKLENLK;ELVLDNCK;ELVLDNCKSIEGK;ISGDLEVLAEK;ISGDLEVLAEKCPNLK;ISGDLEVLAEKCPNLKHLNLSGNK;KLELSENR;KREPDDEGEEDD;LENLKSLDLFNCEVTNLNAYR;LENLKSLDLFNCEVTNLNAYRENVFK;LKKLELSENR;NRTPSDVKELVLDNCK;SLDLFNCEVTNLNAYR;SLDLFNCEVTNLNAYRENVFK;TPSDVKELVLDNCK	10090	16	16	11	41.7	28.537	8938500000	493670000	286820000	391740000	308870000	173880000	238610000	320310000	245550000	160190000	128610000	183520000	225350000	183580000	125250000	212610000	163390000	205120000	179800000	336410000	279690000	336700000	224180000	237210000	248380000	273210000	197910000	409290000	235150000	201500000	180010000	134850000	264180000	308940000	221060000	369950000	253020000	108440000
Q92688	Acidic leucine-rich nuclear phosphoprotein 32 family member B	ANP32B	sp|Q92688|AN32B_HUMAN Acidic leucine-rich nuclear phosphoprotein 32 family member B OS=Homo sapiens OX=9606 GN=ANP32B PE=1 SV=1	Homo sapiens	ELVLDNCK;KLELSENR;LKDISTLEPLK;LKDISTLEPLKK;LKKLELSENR	9606	5	2	2	12	28.787	1219300000	120400000	29317000	49337000	13115000	44734000	14491000	130270000	12449000	9549300	29079000	12353000	54170000	5377600	21605000	17964000	72502000	59976000	60082000	15246000	8213300	7833100	24703000	2824900	14405000	30916000	10469000	64223000	49300000	7531000	6230400	3546400	10304000	69283000	94649000	2185200	40656000	89941000
P97822	Acidic leucine-rich nuclear phosphoprotein 32 family member E	Anp32e	sp|P97822|AN32E_MOUSE Acidic leucine-rich nuclear phosphoprotein 32 family member E OS=Mus musculus OX=10090 GN=Anp32e PE=1 SV=2	Mus musculus	CPNLTYLNLSGNK;CPNLTYLNLSGNKIK;DEIQDEEDDDDYVDEGEEEEEEEEEGLRGEK;DEIQDEEDDDDYVDEGEEEEEEEEEGLRGEKR;DLSTVEALQNLK;DLSTVEALQNLKNLK;IKDLSTVEALQNLK;IKDLSTVEALQNLKNLK;KLELSDNIISGGLEVLAEK;KLELSDNIISGGLEVLAEKCPNLTYLNLSGNK;KRDAEDDGEEDDD;LELSDNIISGGLEVLAEK;LPSLNKLR	10090	13	13	3	39.2	29.622	4161400000	225480000	133160000	182000000	87724000	84735000	104410000	152330000	108250000	102070000	102430000	95768000	101420000	47357000	63339000	148180000	162210000	191740000	261250000	171840000	109990000	93654000	71553000	54699000	142760000	146060000	90484000	55747000	85271000	69923000	47653000	48584000	148490000	133970000	109150000	94452000	133230000	67163000
P10107	Annexin A1	Anxa1	sp|P10107|ANXA1_MOUSE Annexin A1 OS=Mus musculus OX=10090 GN=Anxa1 PE=1 SV=2	Mus musculus	ALLALAKGDR;CQDLSVNQDLADTDAR;DITSDTSGDFRK;DLAKDITSDTSGDFRK;FLENQEQEYVQAVK;GTDVNVFTTILTSR;GVDEATIIDILTK;GVDEATIIDILTKR;KGTDVNVFTTILTSR;RKGTDVNVFTTILTSR;TPAQFDADELR	10090	11	11	8	28	38.734	834100000	34099000	21932000	21352000	33337000	24991000	18479000	41688000	20638000	10890000	12729000	19870000	29892000	25772000	14763000	41799000	43812000	32467000	20257000	28087000	25152000	14621000	13856000	19043000	24038000	16683000	26870000	32595000	17137000	12846000	8223600	15983000	22852000	16742000	37209000	12728000	20663000	9146700
P48036	Annexin A5	Anxa5	sp|P48036|ANXA5_MOUSE Annexin A5 OS=Mus musculus OX=10090 GN=Anxa5 PE=1 SV=1	Mus musculus	ATRGTVTDFPGFDGR;DLVDDLKSELTGKFEK;GLGTDEDSILNLLTSR;GTVTDFPGFDGR;GTVTDFPGFDGRADAEVLR;GTVTDFPGFDGRADAEVLRK;SNAQRQEIAQEFK;SNAQRQEIAQEFKTLFGR;VLTEIIASR	10090	9	9	8	25.7	35.752	1724000000	59443000	64417000	51366000	61839000	56011000	21006000	41227000	70487000	59742000	62149000	26678000	64248000	30918000	32413000	52356000	47238000	59890000	45120000	68184000	43881000	23937000	28763000	39069000	61336000	60275000	46858000	28666000	38212000	30392000	12605000	14589000	51020000	54173000	89753000	68244000	57508000	28082000
Q07076	Annexin A7	Anxa7	sp|Q07076|ANXA7_MOUSE Annexin A7 OS=Mus musculus OX=10090 GN=Anxa7 PE=1 SV=2	Mus musculus	GFGTDEQAIVDVVSNR	10090	1	1	1	3.5	49.925	90401000	3938200	0	0	1647300	1994700	2938200	3954300	1456800	3632000	4262300	2344500	1795800	4229600	3891200	4376600	6181600	2456700	3767400	2874100	1847000	1478600	1404200	1326000	2709900	2751600	2302300	0	2571000	1678200	0	0	0	3190700	3853000	4629900	4917400	3936800
O35643	AP-1 complex subunit beta-1	Ap1b1	sp|O35643|AP1B1_MOUSE AP-1 complex subunit beta-1 OS=Mus musculus OX=10090 GN=Ap1b1 PE=1 SV=2	Mus musculus	CAIKVEQSAER;DCEDPNPLIR;DCPLNTEAASNKLQSSNIFTVAK;DCPLNTEAASNKLQSSNIFTVAKR;DIANENEAQFQIR;KGEIFELK;TDSKYFTTTK	10090	7	7	3	8.1	103.93	910830000	19704000	13703000	21159000	21500000	22730000	19929000	24507000	28426000	22638000	29404000	41158000	14751000	12689000	18009000	37181000	39374000	22261000	37946000	11147000	12605000	6924400	56529000	28913000	20588000	24474000	39868000	10204000	23019000	18535000	11323000	33316000	17971000	35973000	40145000	50418000	21811000	11493000
Q9DB50	AP-1 complex subunit sigma-2	Ap1s2	sp|Q9DB50|AP1S2_MOUSE AP-1 complex subunit sigma-2 OS=Mus musculus OX=10090 GN=Ap1s2 PE=1 SV=1	Mus musculus	AIEQADLLQEDAK	10090	1	1	1	8.1	18.929	35328000	938730	1133400	2342900	1547500	0	688970	0	938740	617680	571460	0	0	753940	545810	3898000	1034300	1150700	0	891060	0	0	1453800	830550	0	1166600	1049200	2418200	0	0	926060	1119500	928840	1609200	1162000	2402800	3208100	1052800
O95782	AP-2 complex subunit alpha-1	AP2A1	sp|O95782|AP2A1_HUMAN AP-2 complex subunit alpha-1 OS=Homo sapiens OX=9606 GN=AP2A1 PE=1 SV=3	Homo sapiens	GLAVFISDIRNCK;INKELANIR;KNPDDFKTCVSLAVSR;LVECLETVLNK;NADVELQQR;THIDTVINALKTER;VGGYILGEFGNLIAGDPR	9606	7	3	1	9.2	107.54	159890000	4690400	5467700	0	1462100	11572000	798120	7317200	9612600	7691100	2445900	0	2526700	1496900	1708900	3822800	0	16079000	1958600	6281000	0	3433900	5561400	0	6442400	0	9997200	0	1326900	0	2552100	847440	5124000	10246000	13957000	1646500	13826000	3601100
P17427	AP-2 complex subunit alpha-2	Ap2a2	sp|P17427|AP2A2_MOUSE AP-2 complex subunit alpha-2 OS=Mus musculus OX=10090 GN=Ap2a2 PE=1 SV=2	Mus musculus	GLAVFISDIRNCK;INKELANIR;KGPSTVTDLEETKR;NADVELQQR;QLSNPQQEVQNIFK;THIETVINALKTER;VGGYILGEFGNLIAGDPR;WKQLSNPQQEVQNIFK	10090	8	8	1	9.9	104.02	571460000	14039000	12820000	27574000	9025400	27143000	16469000	25771000	24784000	8252400	5786100	7656400	9491000	8934100	4597500	13888000	31176000	8587400	6178400	53007000	23486000	23447000	5310100	30071000	16922000	27151000	15752000	21422000	6402000	11372000	15620000	4486500	9349200	18927000	11978000	10482000	4103600	7546900
P63010	AP-2 complex subunit beta	AP2B1	sp|P63010|AP2B1_HUMAN AP-2 complex subunit beta OS=Homo sapiens OX=9606 GN=AP2B1 PE=1 SV=1	Homo sapiens	CAIKVEQSAER;DCEDPNPLIR;KGEIFELK;LLSTDPVTAK;LQNNNVYTIAK;TDSKYFTTNK	9606	6	3	0	6.4	104.55	81687000	6397400	2098000	1806400	5507400	3038800	856590	3222500	1199900	2282000	1112800	551850	1033800	0	3581900	1480200	2426500	1901300	1876900	2298500	2496800	3841500	2021900	0	930140	6313900	2562100	639010	2029700	4787900	1248700	2157700	1742700	2159300	2170800	2356700	1555700	3098800
P84091	AP-2 complex subunit mu	Ap2m1	sp|P84091|AP2M1_MOUSE AP-2 complex subunit mu OS=Mus musculus OX=10090 GN=Ap2m1 PE=1 SV=1	Mus musculus	LNYSDHDVIKWVR;SGKQSIAIDDCTFHQCVR	10090	2	2	0	7.1	49.654	161820000	5270400	2717000	2557300	18755000	3824500	1317900	6760500	23797000	8003200	3574100	2247100	0	1973500	0	0	2801700	0	0	21822000	12033000	6744800	0	3863100	15681000	3259900	3189900	0	2324000	0	0	1360200	4715200	0	3228000	0	0	5859600
Q13367	AP-3 complex subunit beta-2	AP3B2	sp|Q13367|AP3B2_HUMAN AP-3 complex subunit beta-2 OS=Homo sapiens OX=9606 GN=AP3B2 PE=1 SV=2	Homo sapiens	ATGYQELPDWPEEAPDPSVR;DHFQLGSLSHLLNAK;QLIVPSEQGGALSR	9606	3	3	0	4.5	119.06	180030000	9845300	2563600	3508500	6399100	5853100	3064700	3971200	4063300	6917400	5454100	4937800	6999400	0	1125600	3339800	7094400	11489000	4651700	3837600	9135900	1167100	3403600	4609100	2796400	1362100	4850000	8516200	7355300	1748800	2031000	4882200	4650100	9441600	7205900	9431700	2322500	7031100
P13798	Acylamino-acid-releasing enzyme	APEH	sp|P13798|ACPH_HUMAN Acylamino-acid-releasing enzyme OS=Homo sapiens OX=9606 GN=APEH PE=1 SV=4	Homo sapiens	QYLVFHDGDSVVFAGPAGNSVETR	9606	1	1	0	3.3	81.224	69395000	0	1816600	2859700	0	0	0	4093200	1041000	1669000	3148000	4498000	0	1715400	4681200	0	5293300	0	1587000	0	0	3235700	4758200	4282500	8688200	2200700	1597000	0	3566300	1266800	1165800	0	1793800	1663900	0	0	2773700	0
P28352	DNA-(apurinic or apyrimidinic site) lyase	Apex1	sp|P28352|APEX1_MOUSE DNA-(apurinic or apyrimidinic site) endonuclease OS=Mus musculus OX=10090 GN=Apex1 PE=1 SV=2	Mus musculus	ALGSDHCPITLYLAL;EAAGEGPVLYEDPPDQK;EAAGEGPVLYEDPPDQKTSPSGK;EEAPDILCLQETK;EGYSGVGLLSR;NAGFTPQER;SKALGSDHCPITLYLAL	10090	7	7	2	23	35.49	739950000	29415000	27882000	23531000	40189000	23600000	13566000	13034000	8183000	14834000	10585000	21932000	20551000	20171000	12386000	23434000	22776000	13341000	14267000	30754000	9108600	32492000	17547000	25224000	22120000	28432000	30207000	23414000	13678000	16386000	19241000	12591000	19193000	36474000	25776000	12930000	10705000	7896300
O35841	Apoptosis inhibitor 5	Api5	sp|O35841|API5_MOUSE Apoptosis inhibitor 5 OS=Mus musculus OX=10090 GN=Api5 PE=1 SV=2	Mus musculus	ELPQFATGENLPR;NYGILADATEQVGQHKDAYQVILDGVK;PTVEELYR;QAIKELPQFATGENLPR;STVTLSWKPVQK	10090	5	5	0	12.7	56.784	655620000	26036000	23592000	30253000	14140000	8405200	4857400	25729000	17733000	13406000	12533000	16791000	11338000	9728700	22500000	30749000	19357000	11218000	20541000	25434000	21723000	28494000	17949000	14442000	22577000	12656000	32175000	9312900	2099400	14589000	10704000	20884000	26131000	28338000	20669000	12612000	15918000	8790800
Q9D7N9	Adipocyte plasma membrane-associated protein	Apmap	sp|Q9D7N9|APMAP_MOUSE Adipocyte plasma membrane-associated protein OS=Mus musculus OX=10090 GN=Apmap PE=1 SV=1	Mus musculus	LENGEIETIAR;TRDDEPTCGRPLGIR	10090	2	2	1	6.3	46.434	75241000	2081200	2393900	1478300	2421500	1736700	1573800	2054900	3068200	1418900	1004300	1113500	5877700	899570	3376500	3757100	2405100	1417600	3322100	2598000	2550200	0	1753900	1978800	1939000	3209600	2817500	1624900	1062300	1580300	1798000	0	1194100	5638500	0	1115600	2979500	2358500
Q8K4Z3	NAD(P)H-hydrate epimerase	Apoa1bp	sp|Q8K4Z3|NNRE_MOUSE NAD(P)H-hydrate epimerase OS=Mus musculus OX=10090 GN=Naxe PE=1 SV=1	Mus musculus	GNPSGIQPDLLISLTAPK;KYQLNLPSYPDTECVYR;KYQLNLPSYPDTECVYRLQ;LFGYQPTIYYPK;RPNKPLFTGLVTQCQK;SPPTVLVICGPGNNGGDGLVCAR;YQLNLPSYPDTECVYR;YQLNLPSYPDTECVYRLQ	10090	8	8	7	31.2	30.972	721920000	24201000	11443000	39848000	15076000	21895000	5125200	11182000	21020000	41447000	26556000	8812800	18799000	13627000	9478600	19754000	24720000	20710000	22333000	35160000	36609000	10968000	18022000	21654000	15388000	12899000	26545000	10675000	11416000	16760000	11319000	11797000	18161000	24523000	34625000	17912000	31462000	9525200
Q9DCZ4	Apolipoprotein O	Apoo	sp|Q9DCZ4|MIC26_MOUSE MICOS complex subunit Mic26 OS=Mus musculus OX=10090 GN=Apoo PE=1 SV=2	Mus musculus	IDELSLYSVPEGQSK;TQLEENISQLR	10090	2	2	2	13.1	22.604	89493000	0	0	0	4098000	1305500	2476100	6034200	3471700	7925700	0	930320	0	0	3046800	6309700	2873800	742290	0	3246300	0	1962700	1420300	5200700	7191900	3633400	4741900	0	1049800	0	4505500	5485800	4202500	3098800	0	4539300	0	0
Q8K3H0	DCC-interacting protein 13-alpha	Appl1	sp|Q8K3H0|DP13A_MOUSE DCC-interacting protein 13-alpha OS=Mus musculus OX=10090 GN=Appl1 PE=1 SV=1	Mus musculus	ENDKVK;PGIDKLPIEETLEDSPQTR	10090	2	2	0	3.5	79.327	93089000	5396900	4467000	6085400	3607500	4493500	2621900	10233000	2651700	876510	4170000	3615900	4057900	4330500	1648700	2189600	7126700	0	0	3883000	4793400	2546400	0	2723900	3303300	171320	4527100	0	3292200	0	0	0	0	0	0	0	275940	4261100
Q02013	Aquaporin-1	Aqp1	sp|Q02013|AQP1_MOUSE Aquaporin-1 OS=Mus musculus OX=10090 GN=Aqp1 PE=1 SV=3	Mus musculus	SFGSAVLTR;VWTSGQVEEYDLDADDINSR	10090	2	2	1	10.8	28.793	201160000	13205000	4968500	6453100	8126200	7835400	0	6817000	4680700	6350100	6313000	3550700	11236000	4483800	4030600	7552500	8609700	11823000	2827700	7961700	5135200	14849000	5270400	5556300	3050500	4223300	5409500	0	0	6678800	0	7743400	3868000	3132800	7649200	1769400	0	4155200
P55088	Aquaporin-4	Aqp4	sp|P55088|AQP4_MOUSE Aquaporin-4 OS=Mus musculus OX=10090 GN=Aqp4 PE=1 SV=2	Mus musculus	GKDSSGEVLSSV;KGKDSSGEVLSSV;SQVETEDLILKPGVVHVIDIDR;SQVETEDLILKPGVVHVIDIDRGEEK	10090	4	4	4	12.1	34.436	1092200000	39682000	33492000	30711000	14585000	23353000	22238000	24274000	48065000	23988000	56178000	13796000	25427000	20288000	34786000	23888000	41971000	61328000	35469000	32283000	14171000	6251600	20470000	16795000	31607000	16809000	16138000	23316000	46970000	26609000	14865000	46716000	21096000	41972000	48628000	50637000	43349000	23457000
P48444	Coatomer subunit delta	ARCN1	sp|P48444|COPD_HUMAN Coatomer subunit delta OS=Homo sapiens OX=9606 GN=ARCN1 PE=1 SV=1	Homo sapiens	LFTAESLIGLKNPEK;NTLEWCLPVIDAK	9606	2	2	0	5.5	57.21	49798000	2549700	2258700	1491300	923500	1137300	3486400	2823600	3319500	0	0	1360600	2593800	0	0	889990	1488200	1924500	945400	0	1305800	0	1462800	1820000	0	3309700	1372600	1489900	1676500	900250	433640	0	2257000	0	4252000	1184100	1141200	1592900
Q5FWK3	Rho GTPase-activating protein 1	Arhgap1	sp|Q5FWK3|RHG01_MOUSE Rho GTPase-activating protein 1 OS=Mus musculus OX=10090 GN=Arhgap1 PE=1 SV=1	Mus musculus	FLLDHQGELFPSTDAQGV;SPGQDPIPIVLR	10090	2	2	2	6.8	50.41	208590000	7260600	5710000	0	6289900	8839900	9967600	9993800	14837000	4017400	3831800	2925600	4716900	5006500	4685300	1736300	6409600	4758200	3227200	3670700	2821200	3603500	4210800	5613900	7709400	6229200	6518100	8877100	4827200	7197200	2280300	5359800	5985000	7476300	12557000	4109000	5334100	7177000
Q99PT1	Rho GDP-dissociation inhibitor 1	Arhgdia	sp|Q99PT1|GDIR1_MOUSE Rho GDP-dissociation inhibitor 1 OS=Mus musculus OX=10090 GN=Arhgdia PE=1 SV=3	Mus musculus	AEQEPTAEQLAQIAAENEEDEHSVNYKPPAQK;SIQEIQELDKDDESLR;SIQEIQELDKDDESLRK;VAVSADPNVPNVIVTR	10090	4	4	1	31.9	23.407	3206500000	90703000	63097000	165890000	23873000	56077000	27131000	45105000	92549000	68934000	57833000	47159000	285530000	29946000	75473000	27693000	50223000	138800000	248100000	248940000	160050000	34846000	76596000	79968000	29054000	110130000	211670000	11833000	40013000	28228000	109290000	134210000	43639000	66340000	49326000	132120000	46151000	91675000
Q9WUL7	ADP-ribosylation factor-like protein 3	Arl3	sp|Q9WUL7|ARL3_MOUSE ADP-ribosylation factor-like protein 3 OS=Mus musculus OX=10090 GN=Arl3 PE=1 SV=1	Mus musculus	FEETGQELTELLEEEK;GLLSILRK;ILLLGLDNAGK;ILLLGLDNAGKTTLLK;LSCVPVLIFANKQDLLTAAPASEIAEGLNLHTIR;QLASEDISHITPTQGFNIK;SVQSQGFKLNVWDIGGQR;SVQSQGFKLNVWDIGGQRK	10090	8	8	1	61.5	20.486	1777000000	76048000	54033000	96266000	44243000	43898000	29781000	68539000	39577000	56107000	49544000	40662000	93699000	36659000	33872000	56305000	30606000	42426000	61653000	75415000	57754000	31131000	16385000	38569000	57419000	48113000	68979000	47520000	47229000	23251000	21787000	26181000	36366000	59497000	32189000	67673000	67587000	25967000
Q9D7A8	Armadillo repeat-containing protein 1	Armc1	sp|Q9D7A8|ARMC1_MOUSE Armadillo repeat-containing protein 1 OS=Mus musculus OX=10090 GN=Armc1 PE=1 SV=1	Mus musculus	VGSHPEGGASWLSTAANFLSR	10090	1	1	0	7.4	31.246	85792000	6328800	0	987070	0	1909300	1888400	3999300	1946700	7657200	2349400	2796100	11620000	5054900	0	0	3912600	7657500	2352100	0	1507600	0	1811600	0	3161900	4057000	2964000	0	1585200	932890	0	1339000	0	2342600	0	2552900	3078400	6920500
Q9D0L7	Armadillo repeat-containing protein 10	Armc10	sp|Q9D0L7|ARM10_MOUSE Armadillo repeat-containing protein 10 OS=Mus musculus OX=10090 GN=Armc10 PE=1 SV=1	Mus musculus	ALNALNNLSVNVENQTK;ALVTLGNNAAFSTNQAIIR	10090	2	2	2	11.8	33.31	58403000	1791500	1308100	4329500	1326300	758400	593820	3367600	1602200	2644500	1088700	3677800	5521200	0	461200	1698200	2916700	2226800	642230	2285800	0	1506200	2170900	1552100	1225800	1464700	787030	1333500	0	0	763470	0	762500	1707300	2915600	2608600	1364400	2048500
Q92747	Actin-related protein 2/3 complex subunit 1A	ARPC1A	sp|Q92747|ARC1A_HUMAN Actin-related protein 2/3 complex subunit 1A OS=Homo sapiens OX=9606 GN=ARPC1A PE=1 SV=2	Homo sapiens	SLHQFLLEPITCHAWNR;SLHQFLLEPITCHAWNRDR	9606	2	2	0	5.1	41.569	616410000	15672000	50441000	0	26952000	12974000	19667000	25297000	23666000	11335000	11814000	5047000	38228000	15454000	10516000	24417000	34354000	8616300	15262000	17449000	12033000	8781800	31052000	23879000	14506000	10772000	14171000	17324000	13167000	9397300	11420000	8186100	14860000	11797000	11895000	18165000	17841000	15623000
P59998	Actin-related protein 2/3 complex subunit 4	ARPC4	sp|P59998|ARPC4_HUMAN Actin-related protein 2/3 complex subunit 4 OS=Homo sapiens OX=9606 GN=ARPC4 PE=1 SV=3	Homo sapiens	ELLLQPVTISR;TATLRPYLSAVR	9606	2	2	0	13.7	19.667	276880000	8798500	0	19930000	6277900	6201900	5565200	13381000	9285700	8299500	6847400	7900600	9231500	5961000	7336100	9787900	5780100	12193000	7519200	9633100	7747000	7435900	5968800	6654500	14014000	8571500	2879400	10655000	5474200	5127500	1996400	5960300	7736400	8804700	0	7640500	10287000	7413800
Q9BPX5	Actin-related protein 2/3 complex subunit 5-like protein	ARPC5L	sp|Q9BPX5|ARP5L_HUMAN Actin-related protein 2/3 complex subunit 5-like protein OS=Homo sapiens OX=9606 GN=ARPC5L PE=1 SV=1	Homo sapiens	ALAVGGLGSIIR	9606	1	1	0	7.8	16.941	63976000	2770300	0	3889700	2319200	0	3670300	0	3002500	3784100	2712100	0	0	0	3905400	0	4250900	3580000	2134500	0	2188800	0	0	0	0	0	0	9690500	0	0	0	0	5559800	5461500	0	2954000	2102700	2893200
Q9D0A3	Arpin	Arpin	sp|Q9D0A3|ARPIN_MOUSE Arpin OS=Mus musculus OX=10090 GN=Arpin PE=1 SV=1	Mus musculus	LPGTWDPATHQGGNGILLEGELVDVSR	10090	1	1	1	11.9	25.193	38092000	0	0	0	0	0	6518700	1073800	2276500	0	836670	0	0	1729800	0	1369200	1586600	0	2668000	3284700	0	1435300	0	0	2101000	0	0	1789000	0	0	5989300	0	5433800	0	0	0	0	0
P49407	Beta-arrestin-1	ARRB1	sp|P49407|ARRB1_HUMAN Beta-arrestin-1 OS=Homo sapiens OX=9606 GN=ARRB1 PE=1 SV=2;sp|P36575|ARRC_HUMAN Arrestin-C OS=Homo sapiens OX=9606 GN=ARR3 PE=1 SV=2;sp|P32121|ARRB2_HUMAN Beta-arrestin-2 OS=Homo sapiens OX=9606 GN=ARRB2 PE=1 SV=2	Homo sapiens	GLALDGKLK;RGLALDGK;VYTLTPFLANNR;VYVTLTCAFR	9606	4	3	0	7.7	47.065	1254400000	14235000	38404000	88014000	64723000	6351400	10053000	5115700	110950000	15856000	133710000	32757000	4093700	42730000	18873000	25640000	50760000	73829000	0	138100000	25074000	23793000	14457000	7265300	100530000	41758000	7626700	0	5092000	0	0	17412000	11881000	70994000	0	15222000	39128000	36420000
Q91WU5	Arsenite methyltransferase	As3mt	sp|Q91WU5|AS3MT_MOUSE Arsenite methyltransferase OS=Mus musculus OX=10090 GN=As3mt PE=1 SV=2	Mus musculus	AASRDADEIHK;FAPDFLFTPVDASLPAPQGR	10090	2	2	2	8.2	41.793	145850000	1655300	4613200	2108300	5270100	3130300	0	1926200	3848200	4583400	3239300	2157900	5070000	2027900	2646600	4085200	7143600	4302500	2948800	5237300	3998100	3187000	4593100	3361800	0	10367000	3334600	11925000	1917200	6385800	3812300	2838300	3929300	0	5978300	7175600	7048700	1655300
O54984	ATPase Asna1	Asna1	sp|O54984|GET3_MOUSE ATPase GET3 OS=Mus musculus OX=10090 GN=Get3 PE=1 SV=2	Mus musculus	GADKVNTFSALLLEPYKPPSTQ;LEETLPVIR;LLNFPTIVER	10090	3	3	1	11.8	38.822	139720000	6451700	4075800	6003300	3398200	4323600	3155000	9962000	851250	5240600	5790900	2359500	2240000	3607200	3934600	4980300	8240000	3585000	2522600	8234300	5645300	2486900	2563900	0	5384500	3536700	4193200	3726000	2782300	1124400	1037600	1758000	3286600	6609800	3284300	0	3344700	3811800
Q8BSY0	Aspartyl/asparaginyl beta-hydroxylase	Asph	sp|Q8BSY0|ASPH_MOUSE Aspartyl/asparaginyl beta-hydroxylase OS=Mus musculus OX=10090 GN=Asph PE=1 SV=1	Mus musculus	GGGGNSSSSGSGSGSGSGSPSTGSSGSSSSPGAR;GGGGNSSSSGSGSGSGSGSPSTGSSGSSSSPGARR	10090	2	2	2	4.7	83.041	39050000	2638100	4731700	0	0	4808000	1272000	352880	323700	1478800	0	1026900	0	0	0	0	0	0	0	0	1956800	2772200	0	0	0	875150	2688400	579430	0	0	1508400	4134800	0	1543100	2768600	3591500	0	2293400
Q8C0M9	Isoaspartyl peptidase/L-asparaginase	Asrgl1	sp|Q8C0M9|ASGL1_MOUSE Isoaspartyl peptidase/L-asparaginase OS=Mus musculus OX=10090 GN=Asrgl1 PE=1 SV=1	Mus musculus	GNLAYATSTGGIVNK;LQAGIDLCETR;WTSASMPWAAVKNGKLQAGIDLCETR	10090	3	3	3	12.6	33.95	135850000	7246500	3328400	2702000	5101100	0	3141400	9877400	7885500	4571700	5868300	5761900	3247300	4546700	1254800	4247000	0	4732900	2826500	1551600	624550	3539900	2066200	2051400	1589800	3666600	3463800	1793700	4793600	4379400	3340300	2921400	6576800	1563900	7386100	6168600	2031000	4390200
P16460	Argininosuccinate synthase	Ass1	sp|P16460|ASSY_MOUSE Argininosuccinate synthase OS=Mus musculus OX=10090 GN=Ass1 PE=1 SV=1	Mus musculus	TQDPAKAPNSPDVLEIEFK;TQDPAKAPNSPDVLEIEFKK	10090	2	2	2	4.9	46.584	225690000	5616700	2755000	11547000	6836600	5416600	9895700	30214000	6403300	4424100	7012300	5491500	3844100	3581800	0	16076000	18435000	3881700	5122300	3963600	0	1883500	1834300	0	2052900	2522100	8437300	9061500	14700000	12111000	1279200	3014300	4757800	2974000	0	4060900	6485000	5583800
Q9Z2A5	Arginyl-tRNA--protein transferase 1	Ate1	sp|Q9Z2A5|ATE1_MOUSE Arginyl-tRNA--protein transferase 1 OS=Mus musculus OX=10090 GN=Ate1 PE=1 SV=2	Mus musculus	FNQDPEAEDEGR;SLEDLIFQSLPENASHKLEVR	10090	2	2	2	6.4	59.146	59473000	3679300	1117200	1386200	1035000	1103900	485360	2575400	683610	1741100	379770	2542000	687700	1205500	0	513720	3880200	371270	2832600	3372000	728880	1303900	1262500	3612900	1690800	561480	1108800	2678200	3044500	1253600	1000600	4499400	625500	640920	5869100	0	0	4393100
Q9CWJ9	Bifunctional purine biosynthesis protein PURH	Atic	sp|Q9CWJ9|PUR9_MOUSE Bifunctional purine biosynthesis protein ATIC OS=Mus musculus OX=10090 GN=Atic PE=1 SV=2	Mus musculus	APSQLALFSVSDKTGLVEFAR;DGQVIGIGAGQQSR;EVSDGIVAPGYEEEALK;MSSFGDFVALSDICDVPTAK;SLASLGLSLVASGGTAK	10090	5	5	5	15	64.217	305060000	12570000	7716300	0	11188000	5931100	5742600	5900400	6442700	3364700	7214300	6657000	4871300	11552000	6487500	5850500	10809000	6703300	5584500	9375100	5708200	10252000	4410800	11362000	9390800	6371100	982950	9999100	5282500	5159800	17669000	7191600	22597000	5676200	9765200	21797000	17486000	6072500
O08997	Copper transport protein ATOX1	Atox1	sp|O08997|ATOX1_MOUSE Copper transport protein ATOX1 OS=Mus musculus OX=10090 GN=Atox1 PE=1 SV=1	Mus musculus	VCIDSEHSSDTLLATLNKTGK;VLNKLGGVEFNIDLPNKK	10090	2	2	2	57.4	7.3384	322910000	7901000	6408200	11921000	2895700	2218000	17587000	8911800	7455300	11857000	12814000	22956000	13324000	0	2399900	5445700	12477000	12320000	12866000	9342700	7695000	9449600	3978400	6879100	2767400	14577000	6378300	4855900	2705800	1799000	8591800	6145900	5115600	17705000	17125000	14685000	11353000	5796500
P54707	Potassium-transporting ATPase alpha chain 2	ATP12A	sp|P54707|AT12A_HUMAN Potassium-transporting ATPase alpha chain 2 OS=Homo sapiens OX=9606 GN=ATP12A PE=1 SV=3	Homo sapiens	LIFDNLKK;LIIVEGCQR;LYPGSWWDK;SAGIKVIMVTGDHPITAK;TSPQQKLIIVEGCQR;VAEIPFNSTNK	9606	6	1	0	5.9	115.51	52199000	0	0	0	0	0	0	0	0	0	0	0	0	0	0	0	0	0	0	0	0	0	0	0	0	0	0	0	0	0	0	0	52199000	0	0	0	0	0
Q8VDN2	Sodium/potassium-transporting ATPase subunit alpha-1	Atp1a1	sp|Q8VDN2|AT1A1_MOUSE Sodium/potassium-transporting ATPase subunit alpha-1 OS=Mus musculus OX=10090 GN=Atp1a1 PE=1 SV=1	Mus musculus	ACVVHGSDLK;ACVVHGSDLKDMTSEELDDILR;AIAKGVGIISEGNETVEDIAAR;AVAGDASESALLK;AVFQANQENLPILK;AVFQANQENLPILKR;CSSILLHGK;DAFQNAYLELGGLGER;DGPNALTPPPTTPEWVK;DMTSEELDDILR;GGDRIPADLR;GVGIISEGNETVEDIAAR;GVGIISEGNETVEDIAARLNIPVNQVNPR;IISANGCKVDNSSLTGESEPQTR;IMESFKNMVPQQALVIR;IVEIPFNSTNK;IVEIPFNSTNKYQLSIHKNPNASEPK;KYGTDLSR;LIFDNLKK;LIIVEGCQR;LNIPVNQVNPR;MSINAEDVVVGDLVEVK;NIAFFSTNCVEGTAR;NLEAVETLGSTSTICSDK;NLEAV…	10090	33	19	6	34.2	112.98	8978900000	253390000	417310000	189220000	209590000	197540000	250080000	274000000	258100000	238310000	183470000	361840000	308500000	260610000	177040000	244110000	348220000	226180000	132970000	244510000	197410000	400410000	184510000	198270000	285100000	231180000	240970000	271150000	281750000	228720000	235210000	232670000	241470000	279200000	294490000	188880000	212490000	87735000
P50993	Sodium/potassium-transporting ATPase subunit alpha-2	ATP1A2	sp|P50993|AT1A2_HUMAN Sodium/potassium-transporting ATPase subunit alpha-2 OS=Homo sapiens OX=9606 GN=ATP1A2 PE=1 SV=1	Homo sapiens	ACVVHGSDLK;AIAKGVGIISEGNETVEDIAAR;DGPNALTPPPTTPEWVK;DMTSEQLDEILKNHTEIVFAR;GGDRVPADLR;GVGIISEGNETVEDIAAR;LIFDNLKK;LIIVEGCQR;NLEAVETLGSTSTICSDK;NLEAVETLGSTSTICSDKTGTLTQNR;NMVPQQALVIR;QGAIVAVTGDGVNDSPALK;QGAIVAVTGDGVNDSPALKK;SAGIKVIMVTGDHPITAK;TSPQQKLIIVEGCQR;VAEIPFNSTNK;VDNSSLTGESEPQTR	9606	17	1	1	20	112.26	249670000	0	0	0	62392000	12695000	0	0	0	0	2745100	6582800	3669100	0	5446900	0	0	19901000	0	18145000	0	0	12624000	0	4309100	14309000	0	48157000	0	0	5358100	0	14405000	0	0	18931000	0	0
Q6PIC6	Sodium/potassium-transporting ATPase subunit alpha-3	Atp1a3	sp|Q6PIC6|AT1A3_MOUSE Sodium/potassium-transporting ATPase subunit alpha-3 OS=Mus musculus OX=10090 GN=Atp1a3 PE=1 SV=1	Mus musculus	ACVIHGTDLK;ACVIHGTDLKDFTSEQIDEILQNHTEIVFAR;ADIGVAMGIAGSDVSK;AIAKGVGIISEGNETVEDIAAR;AIAKGVGIISEGNETVEDIAARLNIPVSQVNPR;AVFKGGQDNIPVLK;AVFKGGQDNIPVLKR;CATILLQGK;CIELSSGSVK;CIELSSGSVKLMR;DFTSEQIDEILQNHTEIVFAR;DGPNALTPPPTTPEWVK;DLDDLKK;DLDDLKKEVAMTEHK;DVAGDASESALLK;DVAGDASESALLKCIELSSGSVK;EAFQNAYLELGGLGER;EGEKMQVNAEEVVVGDLVEIK;GGDRVPADLR;GGQDNIPVLKR;GVGIISEGNETVEDIAAR;GVGIISEGNETVEDIAARLNIPVSQVNPR;GVV…	10090	58	58	1	54.3	111.69	88276000000	3165500000	2745400000	2638900000	2626700000	2535400000	1214200000	3145100000	2372000000	2611800000	2685800000	2156100000	2258300000	1264100000	1790800000	2278600000	2960500000	2762400000	2613500000	2500800000	2318700000	3192800000	1928300000	3085500000	3407400000	2631700000	2248000000	2535700000	1961900000	1722100000	1465400000	2102300000	1852900000	2457800000	3176900000	2833900000	3028900000	557710000
Q9WV27	Sodium/potassium-transporting ATPase subunit alpha-4	Atp1a4	sp|Q9WV27|AT1A4_MOUSE Sodium/potassium-transporting ATPase subunit alpha-4 OS=Mus musculus OX=10090 GN=Atp1a4 PE=1 SV=3	Mus musculus	IMESFKNMVPQQALVIR;LIFDNLKK;LIIVEGCQR;MTVAHLWFDK;NLEAVETLGSTSTICSDK;NLEAVETLGSTSTICSDKTGTLTQNR;NMVPQQALVIR;SAGIKVIMVTGDHPITAK;TSPQQKLIIVEGCQR;VAEIPFNSTNK	10090	10	1	1	10.2	114.89	163720000	0	512110	5960700	5349500	3419200	2182300	10427000	8405100	0	0	5074200	0	3715000	7250400	0	3214900	0	0	0	4796900	9376000	8148300	9622300	6447200	5765000	9136600	3432100	4663600	3026500	12283000	0	5683000	13388000	12441000	0	0	0
P14094	Sodium/potassium-transporting ATPase subunit beta-1	Atp1b1	sp|P14094|AT1B1_MOUSE Sodium/potassium-transporting ATPase subunit beta-1 OS=Mus musculus OX=10090 GN=Atp1b1 PE=1 SV=1	Mus musculus	AYGENIGYSEK;EGKPCIIIKLNR;FIWNSEKK;SYEAYVLNIIR;TEISFRPNDPK;TEISFRPNDPKSYEAYVLNIIR;VAPPGLTQIPQIQK;YKDSAQKDDMIFEDCGNVPSEPK;YNPNVLPVQCTGK;YNPNVLPVQCTGKR	10090	10	10	3	34.2	35.194	7074000000	384820000	249180000	215250000	220350000	191200000	103260000	143270000	136710000	162050000	151960000	119100000	208610000	121140000	224380000	167280000	313820000	187910000	151070000	241550000	132260000	276120000	147160000	215900000	169900000	219040000	202050000	177760000	194080000	139240000	121690000	214410000	179700000	344600000	308170000	208680000	130290000	86806000
P14231	Sodium/potassium-transporting ATPase subunit beta-2	Atp1b2	sp|P14231|AT1B2_MOUSE Sodium/potassium-transporting ATPase subunit beta-2 OS=Mus musculus OX=10090 GN=Atp1b2 PE=1 SV=2	Mus musculus	FLNVTPNVEVNVECR;INAANIATDDER;INAANIATDDERDKFAGR;KSCGQVVEEWK;LATPGLMIRPK;SCGQVVEEWK;SCGQVVEEWKEFVWNPR;TQLGDCSGIGDPTHYGYSTGQPCVFIK;YYEQPDNGVLNYPK	10090	9	9	1	35.5	33.344	4377800000	157180000	108800000	149990000	117720000	137900000	66681000	179330000	122060000	62978000	128850000	139220000	153770000	66465000	68674000	90609000	135380000	93962000	124850000	97436000	57464000	75180000	233560000	105680000	134620000	114780000	124720000	68560000	285410000	115640000	84195000	146820000	131620000	92794000	183490000	64960000	156430000	102150000
P97370	Sodium/potassium-transporting ATPase subunit beta-3	Atp1b3	sp|P97370|AT1B3_MOUSE Sodium/potassium-transporting ATPase subunit beta-3 OS=Mus musculus OX=10090 GN=Atp1b3 PE=1 SV=1	Mus musculus	ACQFPVSLLEECSGVTDANFGYSK;ACQFPVSLLEECSGVTDANFGYSKGQPCILVK;IIDLIPDGYPQISCLPK;LFIYNPSSGEFLGR	10090	4	4	4	22.7	31.775	663190000	41995000	29620000	0	56473000	11855000	38121000	3254400	11651000	26351000	17319000	21363000	21018000	5736200	4759400	7225900	4698100	31279000	3856500	4910700	9225900	26657000	6924100	7676900	7487900	9627700	19282000	24674000	17056000	8346600	6400700	5197500	20697000	27173000	23703000	35342000	66232000	14919000
O55143	Sarcoplasmic/endoplasmic reticulum calcium ATPase 2	Atp2a2	sp|O55143|AT2A2_MOUSE Sarcoplasmic/endoplasmic reticulum calcium ATPase 2 OS=Mus musculus OX=10090 GN=Atp2a2 PE=1 SV=2	Mus musculus	DIVPGDIVEIAVGDKVPADIR;EFDELSPSAQR;IGIFGQDEDVTSK;TVEEVLGHFGVNESTGLSLEQVKK;VGEATETALTCLVEK	10090	5	5	1	8	114.86	610510000	16683000	9665000	29229000	16817000	10391000	14321000	11164000	13623000	16598000	61988000	16686000	14139000	4490200	14850000	9362600	11096000	16015000	21957000	21883000	14585000	26137000	24615000	14322000	9620600	12676000	16229000	7821300	17386000	10402000	6778000	14016000	6842500	11943000	40075000	21843000	24266000	10377000
G5E829	Plasma membrane calcium-transporting ATPase 1	Atp2b1	sp|G5E829|AT2B1_MOUSE Plasma membrane calcium-transporting ATPase 1 OS=Mus musculus OX=10090 GN=Atp2b1 PE=1 SV=1	Mus musculus	ADVGFAMGIAGTDVAK;EANHDGDFGITLTELR;EASDIILTDDNFTSIVK;EEIPEEELAEDVEEIDHAER;ELRRGQILWFR;GGQVIQIPVADITVGDIAQVK;GIIDSTVSEQR;IDESSLTGESDHVKK;IEDSEPHIPLIDDTDAEDDAPTKR;IEQEQKFTVIR;IEQEQKFTVIRGGQVIQIPVADITVGDIAQVK;IQESYGDVYGICTK;IRNEKGEIEQER;LKTSPNEGLSGNPADLER;NSLKEANHDGDFGITLTELR;QVVAVTGDGTNDGPALK;QVVAVTGDGTNDGPALKK;SATSSSPGSPLHSLETSL;SSLYEGLEKPESR;TSPNEGLSGNPADLER;YGDLLPADGILIQGNDLK;YGDLLPADGILIQGNDLKID…	10090	22	22	3	22.7	134.75	3821800000	126950000	122450000	94191000	93986000	102980000	47694000	94922000	95992000	210180000	81683000	91577000	96585000	63031000	84182000	105380000	100780000	109860000	103150000	165450000	106010000	123460000	77131000	98238000	93698000	169640000	112690000	76516000	103010000	93807000	63385000	103680000	65786000	114450000	165880000	161230000	102220000	31314000
Q01814	Plasma membrane calcium-transporting ATPase 2	ATP2B2	sp|Q01814|AT2B2_HUMAN Plasma membrane calcium-transporting ATPase 2 OS=Homo sapiens OX=9606 GN=ATP2B2 PE=1 SV=2	Homo sapiens	ADVGFAMGIAGTDVAK;EASDIILTDDNFSSIVK;EEIPEEELNEDVEEIDHAER;ELRRGQILWFR;GIIDSTHTEQR;IDESSLTGESDQVR;IDESSLTGESDQVRK;IRNEKGEIEQER;QIFGQNFIPPK;QVVAVTGDGTNDGPALK;QVVAVTGDGTNDGPALKK;SSLYEGLEKPESR;TSPVEGLPGTAPDLEK;YGDLLPADGLFIQGNDLK	9606	14	8	0	14.3	136.87	337280000	7347800	3098000	6702800	23491000	12777000	10168000	20011000	4062800	5972300	11110000	5833700	7809600	4081800	13018000	17071000	19282000	4310900	9543700	6038100	5065800	7896100	9922300	15098000	10578000	8736500	7735100	3890800	4008000	13095000	12326000	12509000	11155000	4887000	7864700	4910300	5875200	7568700
Q16720	Plasma membrane calcium-transporting ATPase 3	ATP2B3	sp|Q16720|AT2B3_HUMAN Plasma membrane calcium-transporting ATPase 3 OS=Homo sapiens OX=9606 GN=ATP2B3 PE=1 SV=3	Homo sapiens	ADVGFAMGIAGTDVAK;EASDIILTDDNFTSIVK;ELRRGQILWFR;GIIDSTTGEQR;IEQEQKFTVIR;IRNEKGEIEQER;QVVAVTGDGTNDGPALK;QVVAVTGDGTNDGPALKK;YGDLLPADGVLIQANDLK	9606	9	2	2	9.3	134.2	12413000	0	0	0	0	0	0	445650	0	0	0	0	1016100	0	0	0	0	689460	294500	0	0	0	0	0	524110	0	0	0	0	0	0	0	738100	0	0	8705200	0	0
Q6Q477	Calcium-transporting ATPase	Atp2b4	sp|Q6Q477|AT2B4_MOUSE Plasma membrane calcium-transporting ATPase 4 OS=Mus musculus OX=10090 GN=Atp2b4 PE=1 SV=1	Mus musculus	ADVGFAMGIAGTDVAK;DNMVRNVIEPMASEGLR;EASDIILTDDNFTSIVK;GIIDSTAGEQR;IDESSLTGESDHVKK;QVVAVTGDGTNDGPALK;QVVAVTGDGTNDGPALKK;YGDLLPADGILIQGNDLK;YGDLLPADGILIQGNDLKIDESSLTGESDHVKK	10090	9	2	2	9.3	133.07	86615000	2162300	0	14884000	2943200	1860200	2841300	1500700	5493900	786070	1413900	4448600	1870700	1752900	1671100	4246200	2945000	1330100	462600	3036300	2015000	0	1581400	2389400	0	488960	2177800	1748600	1661800	2257100	4663000	2556800	1939600	3608600	1536900	949260	1392000	2114300
Q03265	ATP synthase subunit alpha, mitochondrial	Atp5a1	sp|Q03265|ATPA_MOUSE ATP synthase subunit alpha, mitochondrial OS=Mus musculus OX=10090 GN=Atp5f1a PE=1 SV=1	Mus musculus	AVDSLVPIGR;AVDSLVPIGRGQR;DNGKHALIIYDDLSK;EAYPGDVFYLHSR;ELIIGDRQTGK;ELIIGDRQTGKTSIAIDTIINQK;FENAFLSHVISQHQSLLGNIR;GIRPAINVGLSVSR;GMSLNLEPDNVGVVVFGNDKLIK;GVRLTELLK;HALIIYDDLSK;HALIIYDDLSKQAVAYR;ILGADTSVDLEETGR;ILGADTSVDLEETGRVLSIGDGIAR;ISEQSDAKLK;ISVREPMQTGIK;ISVREPMQTGIKAVDSLVPIGR;LKEIVTNFLAGFEP;NVQAEEMVEFSSGLK;QTGKTSIAIDTIINQK;QTGKTSIAIDTIINQKR;RPPGREAYPGDVFYLHSR;RTGAIVDVPVGEELLGR;RVGLKAPGIIPR;SD…	10090	36	36	3	52.8	59.752	41334000000	1420100000	1052000000	1149500000	857650000	1155600000	786100000	1388800000	1819700000	1473000000	950660000	1248400000	1389900000	668900000	847950000	1751400000	1563600000	766150000	1544900000	1316600000	1332400000	873200000	626130000	921260000	1106500000	1276700000	1106100000	1243700000	1013900000	673220000	630810000	765890000	701990000	1121900000	1881000000	1485000000	1422700000	327020000
P56480	ATP synthase subunit beta, mitochondrial	Atp5b	sp|P56480|ATPB_MOUSE ATP synthase subunit beta, mitochondrial OS=Mus musculus OX=10090 GN=Atp5f1b PE=1 SV=2	Mus musculus	ADKLAEEHGS;AHGGYSVFAGVGER;AIAELGIYPAVDPLDSTSR;DSRLVLEVAQHLGESTVR;EGNDLYHEMIESGVINLK;EGNDLYHEMIESGVINLKDATSK;FLSQPFQVAEVFTGHMGK;FTQAGSEVSALLGR;GQKVLDSGAPIKIPVGPETLGR;GSITSVQAIYVPADDLTDPAPATTFAHLDATTVLSR;GVQKILQDYK;IGLFGGAGVGK;IMDPNIVGNEHYDVAR;IMNVIGEPIDER;IMNVIGEPIDERGPIK;IMNVIGEPIDERGPIKTK;ITTTKKGSITSVQAIYVPADDLTDPAPATTFAHLDATTVLSR;KGSITSVQAIYVPADDLTDPAPATTFAHLDATTVLSR;LVLEVAQHLGESTVR;TIAMDGTEGLV…	10090	26	26	3	52	56.3	49224000000	1547600000	1950100000	1879100000	1054300000	904130000	921880000	1632700000	1335500000	1587400000	1088800000	975060000	1318200000	995990000	1232000000	1575400000	1873500000	1191900000	1214300000	1348900000	1090800000	1445800000	753030000	1012000000	1746400000	1476700000	1312400000	2002300000	906410000	855770000	1107100000	948970000	2415500000	2392200000	1705600000	1151700000	1275200000	451670000
Q91VR2	ATP synthase subunit gamma, mitochondrial	Atp5c1	sp|Q91VR2|ATPG_MOUSE ATP synthase subunit gamma, mitochondrial OS=Mus musculus OX=10090 GN=Atp5f1c PE=1 SV=1	Mus musculus	ELKPARVYGTGSLALYEK;GLCGAIHSSVAK;HLIIGVSSDRGLCGAIHSSVAK;VYGTGSLALYEK	10090	4	4	4	13.4	32.886	1054800000	29279000	18008000	64077000	29526000	54759000	15389000	33482000	19400000	23297000	17750000	39651000	44478000	36357000	19176000	0	51377000	11030000	50323000	13401000	40445000	29615000	13544000	26522000	26465000	29951000	26203000	85387000	22263000	26855000	15389000	2219500	12284000	23783000	44041000	39304000	19755000	20645000
Q9D3D9	ATP synthase subunit delta, mitochondrial	Atp5d	sp|Q9D3D9|ATPD_MOUSE ATP synthase subunit delta, mitochondrial OS=Mus musculus OX=10090 GN=Atp5f1d PE=1 SV=1	Mus musculus	ANLEKAQSELSGAADEAAR;AQSELSGAADEAAR;IEANEALVK	10090	3	3	2	16.7	17.6	4884800000	193730000	121670000	209090000	117320000	155900000	79576000	259560000	151420000	148030000	57265000	216740000	83369000	117970000	63879000	115610000	124660000	78264000	49014000	158310000	87135000	189760000	107050000	141670000	66840000	106220000	162490000	100110000	105850000	187180000	83775000	95608000	142680000	132250000	364430000	72553000	237810000	107150000
P56382	ATP synthase subunit epsilon, mitochondrial	Atp5e	sp|P56382|ATP5E_MOUSE ATP synthase subunit epsilon, mitochondrial OS=Mus musculus OX=10090 GN=Atp5f1e PE=1 SV=2	Mus musculus	ANAEKTSGSSIKIVK;DALKTEFKANAEK	10090	2	2	1	44.2	5.8378	79208000	1634000	964800	1603200	7847100	8519600	2293600	4651900	7875200	1037400	0	791080	704330	1734300	720430	8006300	1136900	0	581520	0	1668000	2641300	2186200	3349700	1299300	3142500	2793100	0	1258900	0	3428200	4900500	0	0	2438800	0	0	1938400
Q9CQQ7	ATP synthase F(0) complex subunit B1, mitochondrial	Atp5f1	sp|Q9CQQ7|AT5F1_MOUSE ATP synthase F(0) complex subunit B1, mitochondrial OS=Mus musculus OX=10090 GN=Atp5pb PE=1 SV=1	Mus musculus	CIEDLKLLAK;HYLFDVQR;IAQLEEVK;SISVQQEKETIAK	10090	4	4	3	15.2	28.948	545730000	21876000	16520000	2224500	14203000	15318000	13430000	21310000	18865000	5510500	6856300	14623000	19202000	13813000	12985000	18839000	11191000	7787400	13617000	17528000	8457700	22177000	11131000	24078000	24686000	16387000	19279000	19217000	9472000	21866000	14731000	17204000	11755000	20391000	17945000	12377000	8872400	10874000
Q9DCX2	ATP synthase subunit d, mitochondrial	Atp5h	sp|Q9DCX2|ATP5H_MOUSE ATP synthase subunit d, mitochondrial OS=Mus musculus OX=10090 GN=Atp5pd PE=1 SV=3	Mus musculus	AIGNALKSWNETFHAR;ANVAKPGLVDDFEK;ANVAKPGLVDDFEKK;EDVKSCAEFVSGSQLR;IPVPEDKYTALVDQEEK;IQEYEK;IQEYEKQLEK;KYPYWPHQPIENL;LASLSEKPPAIDWAYYR;SCAEFVSGSQLR;SWNETFHAR;YNALKIPVPEDKYTALVDQEEK;YTALVDQEEK	10090	13	13	12	67.7	18.749	8341200000	342740000	182000000	377350000	309120000	169570000	129930000	224070000	258810000	206510000	247820000	419230000	181100000	176270000	215660000	292320000	204910000	206450000	163940000	266330000	208520000	315550000	137240000	259690000	195260000	178190000	177920000	176450000	161110000	287320000	113330000	141810000	287130000	222100000	284180000	283420000	337790000	115600000
Q06185	ATP synthase subunit e, mitochondrial	Atp5i	sp|Q06185|ATP5I_MOUSE ATP synthase subunit e, mitochondrial OS=Mus musculus OX=10090 GN=Atp5me PE=1 SV=2	Mus musculus	ELAEAQDDSILK;IERELAEAQDDSILK;VPPVQVSPLIK	10090	3	3	2	36.6	8.2355	2785000000	78036000	51484000	109980000	56991000	94624000	44512000	107850000	102720000	48035000	49489000	72949000	52092000	50627000	58525000	125960000	102100000	53785000	78857000	68933000	50219000	59297000	52779000	71589000	67320000	84643000	84681000	108650000	54292000	39344000	42791000	53433000	45059000	97027000	127540000	121090000	217690000	84744000
P97450	ATP synthase-coupling factor 6, mitochondrial	Atp5j	sp|P97450|ATP5J_MOUSE ATP synthase-coupling factor 6, mitochondrial OS=Mus musculus OX=10090 GN=Atp5pf PE=1 SV=1	Mus musculus	FDDPKFEVIDKPQS;FEVIDKPQS;QASGGPVDIGPEYQQDLDR;QASGGPVDIGPEYQQDLDRELYKLK;RQASGGPVDIGPEYQQDLDR	10090	5	5	5	37	12.496	2508400000	66309000	50318000	77087000	62397000	49957000	71238000	57976000	77169000	56055000	103890000	72717000	56185000	41130000	44660000	70915000	66344000	57980000	96300000	103320000	80317000	62345000	43563000	105840000	99537000	139990000	49709000	50153000	42764000	74276000	34735000	64698000	52529000	80175000	97949000	86542000	61380000	36649000
P56135	ATP synthase subunit f, mitochondrial	Atp5j2	sp|P56135|ATPK_MOUSE ATP synthase subunit f, mitochondrial OS=Mus musculus OX=10090 GN=Atp5mf PE=1 SV=3	Mus musculus	ASLVPLK;ASLVPLKEK;ASLVPLKEKK;DFTPSGIAGAFR;DFTPSGIAGAFRR;GYDRYYNKYINVR;LGELPSWIMMR;YYNKYINVR	10090	8	8	8	53.4	10.344	4685600000	157770000	105050000	175600000	214670000	186480000	70996000	152240000	133700000	155530000	121220000	112450000	121520000	107080000	97511000	141380000	232520000	133140000	49322000	166640000	108360000	130440000	85939000	121720000	214670000	112280000	100500000	112950000	102850000	125750000	89943000	136190000	84280000	115390000	168000000	144560000	96976000	81732000
Q9CPQ8	ATP synthase subunit g, mitochondrial	Atp5l	sp|Q9CPQ8|ATP5L_MOUSE ATP synthase subunit g, mitochondrial OS=Mus musculus OX=10090 GN=Atp5mg PE=1 SV=1	Mus musculus	LATFWHYAK;NFAEKAPSMVAAAVTYSKPR;VELVPPTPAEIPTAIQSVK;VELVPPTPAEIPTAIQSVKK	10090	4	4	4	47.6	11.424	486460000	15279000	7346100	25962000	0	12250000	6023700	18782000	11291000	8482000	15860000	24970000	39375000	9962300	0	3390900	0	24441000	22288000	14856000	4842100	14212000	5243700	50598000	26370000	15555000	8747200	7400000	2645100	6533000	8740800	10784000	2525700	18041000	29115000	6609200	7938700	11313000
Q9DB20	ATP synthase subunit O, mitochondrial	Atp5o	sp|Q9DB20|ATPO_MOUSE ATP synthase subunit O, mitochondrial OS=Mus musculus OX=10090 GN=Atp5po PE=1 SV=1	Mus musculus	EKFSPLTANLMNLLAENGR;KLDQVEKELLR;LVRPPVQVYGIEGR;SLNDITKR;VGQLLKDPKVSLAVLNPYIK;VSLAVLNPYIK;VSLAVLNPYIKR;YATALYSAASK;YATALYSAASKEK	10090	9	9	7	40.4	23.363	4256600000	212080000	118710000	137090000	115990000	90855000	86689000	130940000	151880000	93439000	73271000	76322000	186220000	61629000	87506000	117190000	144310000	83729000	119250000	142460000	115760000	149090000	66419000	161030000	160210000	116060000	128200000	83187000	83239000	88453000	81806000	105630000	108590000	165390000	160900000	142150000	110940000	44336000
Q15904	V-type proton ATPase subunit S1	ATP6AP1	sp|Q15904|VAS1_HUMAN V-type proton ATPase subunit S1 OS=Homo sapiens OX=9606 GN=ATP6AP1 PE=1 SV=2	Homo sapiens	EVLTGNDEVIGQVLSTLK	9606	1	1	0	3.8	52.025	15353000	4680500	0	1600200	0	0	0	0	0	0	0	0	1000900	0	0	0	0	0	0	0	0	1686400	0	0	0	0	0	1169100	0	0	0	0	0	0	1958900	1971100	1285500	4077400
Q9Z1G4	V-type proton ATPase 116 kDa subunit a isoform 1	Atp6v0a1	sp|Q9Z1G4|VPP1_MOUSE V-type proton ATPase 116 kDa subunit a1 OS=Mus musculus OX=10090 GN=Atp6v0a1 PE=1 SV=3	Mus musculus	ASLYPCPETPQER;DLNPDVNVFQR;DLNPDVNVFQRK;EINTNQEALKR;ERIPTFER;FTHGFQNIVDAYGIGTYR;GAPLRLGFVAGVINR;GTEHSGSTVPSILNR;HLGTLNFGGIR;IENELKEINTNQEALKR;LGFVAGVINR;MQTNQTPPTYNK;NFLELTELK;RGTEHSGSTVPSILNR	10090	14	14	2	15.6	96.466	1731700000	38852000	28452000	84327000	82905000	32958000	42196000	58475000	68149000	67151000	39596000	52192000	34024000	46433000	30837000	53568000	45762000	62738000	33985000	44378000	41877000	37839000	26289000	48967000	57030000	55519000	36380000	60059000	21652000	37617000	35691000	30700000	63040000	72412000	70303000	43124000	46257000	12487000
P51863	V-type proton ATPase subunit d 1	Atp6v0d1	sp|P51863|VA0D1_MOUSE V-type proton ATPase subunit d 1 OS=Mus musculus OX=10090 GN=Atp6v0d1 PE=1 SV=2	Mus musculus	ADDYEQVKNVADYYPEYK;AKIDNYIPIF;LLFEGAGSNPGDK;LLFEGAGSNPGDKTLEDR;LYPEGLAQLAR;NVADYYPEYK	10090	6	6	0	16.2	40.301	1133700000	48671000	27149000	42682000	35624000	37026000	34377000	30500000	36508000	21920000	30753000	26121000	30884000	12918000	32907000	27100000	10544000	24079000	35910000	45179000	25718000	29173000	10116000	34088000	40689000	33492000	48371000	18099000	21212000	6624400	19528000	44922000	57393000	50599000	40564000	22040000	40266000	28656000
P50516	V-type proton ATPase catalytic subunit A	Atp6v1a	sp|P50516|VATA_MOUSE V-type proton ATPase catalytic subunit A OS=Mus musculus OX=10090 GN=Atp6v1a PE=1 SV=2	Mus musculus	AKEILQEEEDLAEIVQLVGK;ALDEYYDKHFTEFVPLR;ASLAETDKITLEVAK;DIKWEFIPSK;DIKWEFIPSKNLR;IKADYAQLLEDMQNAFR;LAEMPADSGYPAYLGAR;LIKDDFLQQNGYTPYDR;MDFSKLPK;TALVANTSNMPVAAR;VGHSELVGEIIR;VGSHITGGDIYGIVNENSLIK;VGSHITGGDIYGIVNENSLIKHK;VLDALFPCVQGGTTAIPGAFGCGK;YSNSDVIIYVGCGER	10090	15	15	5	34.5	68.325	3237100000	76225000	73150000	86750000	95860000	68286000	53104000	97937000	113340000	83449000	78092000	80467000	113790000	46692000	61197000	99498000	84576000	71752000	79715000	135780000	97899000	102000000	71828000	77273000	144540000	108330000	124400000	94470000	119320000	32956000	60466000	38879000	128360000	117760000	117510000	89999000	111430000	30117000
P21281	V-type proton ATPase subunit B, brain isoform	ATP6V1B2	sp|P21281|VATB2_HUMAN V-type proton ATPase subunit B, brain isoform OS=Homo sapiens OX=9606 GN=ATP6V1B2 PE=1 SV=3	Homo sapiens	AVVQVFEGTSGIDAK;AVVQVFEGTSGIDAKK;GFPGYMYTDLATIYER;GQKIPIFSAAGLPHNEIAAQICR;IPIFSAAGLPHNEIAAQICR;IPQSTLSEFYPR;KTSCEFTGDILR;LTYKTVSGVNGPLVILDHVKFPR;QIYPPINVLPSLSR;QLHNRQIYPPINVLPSLSR;SGQVLEVSGSK;SGQVLEVSGSKAVVQVFEGTSGIDAK;SGQVLEVSGSKAVVQVFEGTSGIDAKK;TPVSEDMLGR;TSCEFTGDILR;TVSGVNGPLVILDHVKFPR;VFNGSGKPIDR;YAEIVHLTLPDGTKR	9606	18	18	0	32.7	56.5	7461500000	300430000	263850000	237520000	174930000	158210000	114920000	394160000	126220000	158600000	254380000	95981000	192840000	192350000	197920000	287690000	293980000	254890000	218450000	227070000	158700000	183490000	109800000	222140000	186210000	157790000	204170000	228680000	111860000	92825000	127520000	158820000	241210000	252610000	399220000	212730000	269380000	96371000
P21283	V-type proton ATPase subunit C 1	ATP6V1C1	sp|P21283|VATC1_HUMAN V-type proton ATPase subunit C 1 OS=Homo sapiens OX=9606 GN=ATP6V1C1 PE=1 SV=4	Homo sapiens	ASAYNNLKGNLQNLER;ASAYNNLKGNLQNLERK;GVTQIDNDLK;GVTQIDNDLKSR;KNAGSLLTR;SSNVLSEDQDSYLCNVTLFR;SSNVLSEDQDSYLCNVTLFRK;TCQQTWEK	9606	8	8	0	17.3	43.941	2198600000	122370000	47889000	48028000	46440000	29080000	67535000	69217000	87331000	100660000	80468000	35726000	51086000	25646000	56650000	48518000	57066000	33440000	42046000	49150000	70313000	38445000	30958000	56287000	301880000	75257000	46732000	27471000	16964000	23605000	43972000	48562000	64853000	48262000	102210000	49897000	54578000	37061000
P57746	V-type proton ATPase subunit D	Atp6v1d	sp|P57746|VATD_MOUSE V-type proton ATPase subunit D OS=Mus musculus OX=10090 GN=Atp6v1d PE=1 SV=1	Mus musculus	AAGEVMEPANLLAEEK;AKKDNVAGVTLPVFEHYHEGTDSYELTGLAR;FTAGDFSTTVIQNVNK;FTAGDFSTTVIQNVNKAQVK	10090	4	4	1	27.1	28.369	350940000	8844600	6670000	5971500	9593300	8211700	11667000	16994000	4552100	7457200	8322100	6888600	5528800	4251000	7891900	6694700	19787000	9073000	16356000	29657000	7937800	32449000	2357100	5852500	21449000	7706000	14582000	2982700	3078800	4694000	7102900	5112100	3064400	6721600	2943600	12284000	16213000	6365400
P36543	V-type proton ATPase subunit E 1	ATP6V1E1	sp|P36543|VATE1_HUMAN V-type proton ATPase subunit E 1 OS=Homo sapiens OX=9606 GN=ATP6V1E1 PE=1 SV=1	Homo sapiens	AEEEFNIEK;AEEEFNIEKGR;AEEEFNIEKGRLVQTQR;ALSDADVQKQIK;ARDDLITDLLNEAK;ARDDLITDLLNEAKQR;GALFGANANR;GALFGANANRK;GALFGANANRKFLD;IKVSNTLESR;KQDFPLVK	9606	11	11	0	34.1	26.145	4600000000	114990000	112160000	101280000	117680000	97799000	88700000	123310000	164910000	170530000	141430000	166740000	150750000	83386000	118080000	196160000	114810000	88995000	100620000	181930000	114610000	118680000	88375000	130210000	125900000	203320000	121890000	101610000	78682000	125150000	83082000	88820000	138470000	153030000	303800000	112550000	77571000	44811000
Q9CR51	V-type proton ATPase subunit G 1	Atp6v1g1	sp|Q9CR51|VATG1_MOUSE V-type proton ATPase subunit G 1 OS=Mus musculus OX=10090 GN=Atp6v1g1 PE=1 SV=3	Mus musculus	AKEAAALGSHGSCSSEVEK;AKEAAALGSHGSCSSEVEKETR;ASQSQGIQQLLQAEK;ASQSQGIQQLLQAEKR;EAAALGSHGSCSSEVEK;EAAALGSHGSCSSEVEKETR;EEAQAEIEQYR;EEAQAEIEQYRLQR;MTVLQNYFEQNR	10090	9	9	5	54.2	13.724	4535100000	134790000	114900000	145030000	117320000	87588000	78204000	118540000	137730000	99715000	140950000	68223000	226080000	105110000	90413000	151020000	158020000	154380000	153080000	172660000	108920000	150230000	22538000	69182000	163690000	116180000	165180000	89245000	128250000	102150000	81369000	87603000	193380000	97545000	187120000	114910000	203890000	79565000
Q9WTT4	V-type proton ATPase subunit G 2	Atp6v1g2	sp|Q9WTT4|VATG2_MOUSE V-type proton ATPase subunit G 2 OS=Mus musculus OX=10090 GN=Atp6v1g2 PE=1 SV=1	Mus musculus	ASQTQGIQQLLQAEK;ASQTQGIQQLLQAEKR	10090	2	2	2	13.6	13.651	2037300000	60794000	116500000	74217000	83384000	35737000	79435000	113470000	59317000	70558000	40457000	37138000	51506000	20725000	55690000	88321000	37955000	49187000	37406000	46310000	51063000	32737000	21519000	88545000	45787000	58013000	55810000	65821000	29754000	28208000	28719000	31896000	42903000	108650000	82327000	66037000	41346000	38749000
Q8BVE3	V-type proton ATPase subunit H	Atp6v1h	sp|Q8BVE3|VATH_MOUSE V-type proton ATPase subunit H OS=Mus musculus OX=10090 GN=Atp6v1h PE=1 SV=1	Mus musculus	ENAVRLNEKNYELLK;GAVDAAVPTNIIAAK;LGESVQDLSSFDEYSSELK;LLEVSDDPQVLAVAAHDVGEYVR;LNEKNYELLK;QLQSEQPQTAAAR	10090	6	6	0	17.6	55.854	1178000000	26004000	23801000	22262000	47475000	28360000	47387000	50800000	39806000	30881000	24832000	25137000	28939000	18676000	29512000	48526000	68119000	25607000	25505000	29972000	36062000	21895000	15080000	38226000	57589000	38317000	65171000	25628000	28003000	15258000	21557000	22077000	2656000	24862000	69648000	29862000	24516000	20513000
O35143	ATPase inhibitor, mitochondrial	Atpif1	sp|O35143|ATIF1_MOUSE ATPase inhibitor, mitochondrial OS=Mus musculus OX=10090 GN=Atp5if1 PE=1 SV=2	Mus musculus	EAGGAFGKR;EKAEEDRYFR;HHEDEIDHHSKEIER;TKEQLAALR	10090	4	4	3	40.6	12.159	144680000	1818300	4483900	5656100	2925700	1926100	601880	3028300	5146900	8770800	10592000	14584000	523250	9331100	859140	1607700	6222100	8691200	1595300	9416700	3815500	0	1029100	1115300	0	2148200	0	0	1458400	3301400	1227000	851290	2824700	5001900	10911000	10568000	2647900	3083300
P28658	Ataxin-10	Atxn10	sp|P28658|ATX10_MOUSE Ataxin-10 OS=Mus musculus OX=10090 GN=Atxn10 PE=1 SV=2	Mus musculus	NLTEDNSQNQDVIAK	10090	1	1	1	3.2	53.706	24823000	0	0	2531700	1241900	0	256230	938530	638520	0	2930600	601720	733270	678580	790630	1268900	715570	719980	0	987500	1105200	1250000	0	0	1394300	1392800	0	516310	0	979990	1441400	0	996540	0	0	712890	0	0
Q13825	Methylglutaconyl-CoA hydratase, mitochondrial	AUH	sp|Q13825|AUHM_HUMAN Methylglutaconyl-CoA hydratase, mitochondrial OS=Homo sapiens OX=9606 GN=AUH PE=1 SV=1	Homo sapiens	AVGLISHVLEQNQEGDAAYRK;SEVPGIFCAGADLK	9606	2	2	0	10.3	35.608	536730000	38483000	6245300	6590500	3166900	6005500	7794400	7662300	27123000	17567000	24695000	5110800	28223000	4816100	9266400	7265500	5279000	23172000	42200000	15651000	7029100	12443000	4269800	12348000	33499000	20838000	23670000	7962200	2086300	2835200	6539500	7230500	24915000	12087000	15191000	15440000	42033000	29223000
Q8IXM2	Chromatin complexes subunit BAP18	BAP18	sp|Q8IXM2|BAP18_HUMAN Chromatin complexes subunit BAP18 OS=Homo sapiens OX=9606 GN=BAP18 PE=1 SV=1	Homo sapiens	VGEIFSAAGAAFTK	9606	1	1	0	8.1	17.9	15943000	0	0	0	0	1048000	1657700	1004400	0	0	0	1371400	0	892620	0	0	0	0	1420000	0	0	702590	734410	0	1604700	1111100	0	0	799500	0	694820	0	808840	952740	0	0	1139900	0
Q91XV3	Brain acid soluble protein 1	Basp1	sp|Q91XV3|BASP1_MOUSE Brain acid soluble protein 1 OS=Mus musculus OX=10090 GN=Basp1 PE=1 SV=3	Mus musculus	AEGAGTEEEGTPK;AEGAGTEEEGTPKESEPQAAADATEVK;AEPEKSEGAAEEQPEPAPAPEQEAAAPGPAAGGEAPK;AGEASAESTGAADGAAPEEGEAK;AGEASAESTGAADGAAPEEGEAKK;AGEASAESTGAADGAAPEEGEAKKTEAPAAAGPEAK;APAPAAPAAAEPQAEAPAAAASSEQSVAVK;APAPAAPAAAEPQAEAPAAAASSEQSVAVKE;DAADGEAKAEEK;EEAPKAEPEKSEGAAEEQPEPAPAPEQEAAAPGPAAGGEAPK;ESEPQAAADATEVK;ESEPQAAADATEVKESTEEKPK;ESEPQAAADATEVKESTEEKPKDAADGEAK;ETPAASEAPSSAAK;ETPAASEAPSSAAKAPAPAAPAAAEPQAEA…	10090	22	22	22	85.4	22.086	43523000000	1370500000	981260000	2032000000	2425800000	1088700000	318800000	795600000	1119900000	769150000	1816200000	971640000	1723000000	979980000	948740000	723800000	1634300000	1056400000	847510000	1421000000	1236600000	1744100000	554220000	1231200000	1062800000	1295700000	1220700000	1273300000	799220000	1175700000	915180000	1317800000	445200000	1621800000	2549800000	934460000	1121400000	442120000
Q9CWF6	Bardet-Biedl syndrome 2 protein homolog	Bbs2	sp|Q9CWF6|BBS2_MOUSE Bardet-Biedl syndrome 2 protein homolog OS=Mus musculus OX=10090 GN=Bbs2 PE=1 SV=1	Mus musculus	GNLLDTSVEQDLIR;SNNINTLFR	10090	2	2	2	3.2	79.931	67940000	3936200	1572000	459740	3156700	1593600	2839500	6327700	1523500	3871600	1034300	2979800	1131500	1288500	1221000	7137400	4196800	1916700	0	2425400	1579900	2595400	1909000	0	2229400	1719000	1647300	1488000	1646600	1152800	991330	0	2369600	0	0	0	0	2516200
O75934	Pre-mRNA-splicing factor SPF27	BCAS2	sp|O75934|SPF27_HUMAN Pre-mRNA-splicing factor SPF27 OS=Homo sapiens OX=9606 GN=BCAS2 PE=1 SV=1	Homo sapiens	EAAAALVEEETR;EAAAALVEEETRR	9606	2	2	0	5.8	26.131	97694000	856140	2112700	0	4079200	1944200	1512800	0	8542200	2384800	0	902400	2505300	984030	1493900	8195500	4217000	1718500	0	3220400	8319800	2808200	3153200	2048500	5840500	8054100	0	4159600	1398200	1361900	1528700	2412100	1495800	0	2591200	2833100	5020300	1787500
P24288	Branched-chain-amino-acid aminotransferase, cytosolic	Bcat1	sp|P24288|BCAT1_MOUSE Branched-chain-amino-acid aminotransferase, cytosolic OS=Mus musculus OX=10090 GN=Bcat1 PE=1 SV=2	Mus musculus	DLIITPATVLK;GSEEVAETFR	10090	2	2	2	5.4	42.791	158460000	4278400	4026500	7388100	3911300	4675800	4401700	2900400	6951500	4886500	6108800	9222200	4709300	3857100	2889100	5516900	3475600	3136000	2173400	6843300	3170900	2851200	3959800	0	4124400	6401200	4765900	3439700	2921300	2305000	5264000	3034400	6086700	7254900	3993900	2857600	4673400	1272900
P59017	Bcl-2-like protein 13	Bcl2l13	sp|P59017|B2L13_MOUSE Bcl-2-like protein 13 OS=Mus musculus OX=10090 GN=Bcl2l13 PE=1 SV=2	Mus musculus	AEGAAQLSEER;ALQTILSQPVTYEAYR	10090	2	2	2	6.2	46.719	28270000	950070	456200	2779600	1786000	828060	439680	1349700	1294500	482970	0	199710	442880	1099200	1583100	0	350550	708620	2237800	0	0	0	1814000	1336000	546660	338400	587370	356640	636000	0	0	1026500	1043700	0	0	1851000	1745200	903550
Q80XN0	D-beta-hydroxybutyrate dehydrogenase, mitochondrial	Bdh1	sp|Q80XN0|BDH_MOUSE D-beta-hydroxybutyrate dehydrogenase, mitochondrial OS=Mus musculus OX=10090 GN=Bdh1 PE=1 SV=2	Mus musculus	TIQLNVCNSEEVEK;VSVVEPGNFIAATSLYSPER	10090	2	2	2	9.9	38.299	102330000	2874000	4466300	0	0	1836600	2351700	10751000	3084900	1573100	3348200	1733600	2049200	2738300	2307800	834830	3092700	9254100	4798500	3314700	380580	0	2053200	5394200	4143500	4473800	2139800	1891000	1927600	844760	0	0	1116400	1263400	2870200	8590300	4834600	2607400
O08539	Myc box-dependent-interacting protein 1	Bin1	sp|O08539|BIN1_MOUSE Myc box-dependent-interacting protein 1 OS=Mus musculus OX=10090 GN=Bin1 PE=1 SV=1	Mus musculus	GVFPENFTERVQ;IAKPVSLLEK;KLVDYDSAR;LNQNLNDVLVSLEK;NQAEEELIK;VNHEPEPASGASPGATIPK;VQAQHDYTATDTDELQLK	10090	7	6	3	15.5	64.469	583400000	33826000	19574000	21363000	25442000	33763000	13958000	29693000	12437000	5566200	12290000	14463000	33488000	13566000	9284800	16594000	16943000	17017000	26467000	12074000	8592300	5343600	8110000	15751000	14520000	10288000	21520000	13796000	15648000	22631000	15377000	11328000	8201000	10967000	15608000	10626000	7283200	8461600
Q9ULD4	Bromodomain and PHD finger-containing protein 3	BRPF3	sp|Q9ULD4|BRPF3_HUMAN Bromodomain and PHD finger-containing protein 3 OS=Homo sapiens OX=9606 GN=BRPF3 PE=1 SV=2	Homo sapiens	VQQAAMELELMPFNVLLR	9606	1	1	1	1.5	135.74	23118000	0	0	0	0	0	0	0	0	0	0	0	0	0	0	0	0	0	0	0	0	0	0	0	0	0	0	10065000	0	0	13053000	0	0	0	0	0	0	0
P18572	Basigin	Bsg	sp|P18572|BASI_MOUSE Basigin OS=Mus musculus OX=10090 GN=Bsg PE=1 SV=2	Mus musculus	AQASVVVLEPGTIQTSVQEVNSK;ETISLRVR;GGKVLQEDTLPDLHTK;GGKVLQEDTLPDLHTKYIVDADDR;KSEHSSEGELAKLVCK;LVCKSDASYPPITDWFWFK;QHAASSLSVDGLTAEDTGTYECR;SEHSSEGELAKLVCK;SEINVEGPPR;SEINVEGPPRIK;SGEYSCIFLPEPVGR;VLQEDTLPDLHTK;VLQEDTLPDLHTKYIVDADDR;YIVDADDR	10090	14	14	14	35	42.444	8214100000	244810000	291660000	317740000	201810000	182270000	142140000	276460000	239550000	216200000	259240000	262540000	248470000	189820000	173940000	223590000	220730000	369710000	249460000	242590000	146410000	283680000	144350000	239000000	175590000	208660000	182810000	209830000	195240000	217150000	154660000	191790000	196870000	304660000	225520000	311760000	273440000	67717000
Q96K17	Transcription factor BTF3 homolog 4	BTF3L4	sp|Q96K17|BT3L4_HUMAN Transcription factor BTF3 homolog 4 OS=Homo sapiens OX=9606 GN=BTF3L4 PE=1 SV=1	Homo sapiens	APKPEDIDEEDDDVPDLVENFDEASK;APKPEDIDEEDDDVPDLVENFDEASKNEAN	9606	2	2	0	19	17.27	167400000	3975800	0	0	5656900	2142300	7634500	9281100	4992500	2687800	3416300	1106800	1359400	6529800	2857900	9180600	6927300	0	0	7157800	2774700	9790100	7526700	4529200	5368400	2559000	0	0	1501800	5352800	13625000	4005600	5795000	12410000	3471300	10876000	2905600	3091800
O35658	Complement component 1 Q subcomponent-binding protein, mitochondrial	C1qbp	sp|O35658|C1QBP_MOUSE Complement component 1 Q subcomponent-binding protein, mitochondrial OS=Mus musculus OX=10090 GN=C1qbp PE=1 SV=1	Mus musculus	AFVEFLTDEIK	10090	1	1	1	4	31.013	56943000	1354500	3326700	0	0	1668900	2698200	2445200	0	0	1523900	0	1116900	1330900	0	2456700	2944300	3472000	2811700	2943900	2054900	0	1011300	2221300	3070700	1755300	0	2330300	1319000	1402900	2475600	0	0	3712200	2533300	2962500	0	1433500
Q80X80	C2 domain-containing protein 2-like	C2cd2l	sp|Q80X80|C2C2L_MOUSE Phospholipid transfer protein C2CD2L OS=Mus musculus OX=10090 GN=C2cd2l PE=1 SV=3	Mus musculus	DEEQPELSTVEELIK;ELTLKVLR;ERDEEQPELSTVEELIK;ESHLSNGLDPVAETAIR;GLLASLFAFK;RQVCPLTPGPGK;SDISERPSVDDVESETGSTGALETR	10090	7	7	5	12.6	76.328	696040000	38347000	4617300	24099000	9984300	9820000	22875000	26543000	24623000	21415000	37900000	18393000	25622000	12593000	21247000	18602000	30782000	11673000	10769000	32752000	22910000	22492000	9483700	9798400	29091000	11812000	10037000	15303000	3281300	9542600	40629000	8016200	11855000	19532000	19720000	20749000	29135000	16334000
Q9WVT6	Carbonic anhydrase 14	Ca14	sp|Q9WVT6|CAH14_MOUSE Carbonic anhydrase 14 OS=Mus musculus OX=10090 GN=Ca14 PE=1 SV=1	Mus musculus	ELFPQQLEQFFR;LQETLSSTEEDPSEPLVQNYR;LQETLSSTEEDPSEPLVQNYRVPQPLNQR	10090	3	3	3	12.2	37.505	794340000	49886000	26477000	11169000	58862000	6803300	25119000	22167000	19893000	5485100	18695000	11690000	37259000	7456500	29800000	11230000	20906000	16751000	7466400	19911000	16346000	30853000	7710000	7562900	12343000	18821000	19454000	50073000	20509000	6296500	11914000	16683000	12463000	41595000	40814000	17416000	56458000	41024000
[truncated: 1,211 more rows]
[truncated: 35 more columns]

## Sheet: Table S4
		Supplementary Table S4: Differentially expressed proteins identified from the ophthalmic artery
					KO PBS/ fl PBS		KO ω3/ KO PBS		fl ω3/ fl PBS
	Protein IDs	Protein names	Gene names	Species	p-value	Log2 fold difference	p-value	Log2 fold difference	p-value	Log2 fold difference
	P08752	Guanine nucleotide-binding protein G(i) subunit alpha-2	Gnai2	Mus musculus	0.000977212	-0.73974	n.s		n.s
	P10107	Annexin A1	Anxa1	Mus musculus	0.00247141	0.550629	n.s		n.s
	Q8WWQ0	PH-interacting protein	PHIP	Homo sapiens	0.00352667	-2.035	n.s		0.017555	-1.39358
	P17710	Hexokinase-1	Hk1	Mus musculus	0.00688074	3.69715	0.039238	-3.32661	n.s
	P30626	Sorcin	SRI	Homo sapiens	0.00774328	4.01418	n.s		0.000291822	6.06513
	Q8K2B3	Succinate dehydrogenase [ubiquinone] flavoprotein subunit, mitochondrial	Sdha	Mus musculus	0.0107901	-0.668836	n.s		0.0407491	-0.445896
[truncated: 54 more rows]

## Sheet: Table S5
		Supplementary Table S5: Differentially expressed retinal proteins
[truncated: 146 more rows]
